# Supplementary material for: Comparative RNA-Seq Transcriptome Analysis on Pulmonary Inflammation in a Mouse Model of Asthma–COPD Overlap Syndrome
Source: Front Cell Dev Biol. 2021 Mar 25;9:628957. doi: 10.3389/fcell.2021.628957 (PMC8044804; doi:10.3389/fcell.2021.628957)
Supplement: Supplementary file 2 [file Table_2.XLSX]

## Sheet: c_vs_asthma
Table S2. Fragments per kilobase of exon per million fragments mapped of differential gene expressions in comparisons of every two groups of control, asthma, COPD, and ACO groups.
gene_ID	log2FoldChange	pvalue	padj
ENSMUSG00000000028	1.76541	3.41143e-11	2.92471e-09
ENSMUSG00000000088	0.956377	0.00507457	0.0646703
ENSMUSG00000000120	0.920782	0.0139875	0.133966
ENSMUSG00000000126	-0.575032	0.017394	0.155982
ENSMUSG00000000182	4.33402	2.86326e-18	5.6141e-16
ENSMUSG00000000202	1.62103	0.00114991	0.0201577
ENSMUSG00000000204	0.847625	0.0179381	0.159203
ENSMUSG00000000216	-0.465119	0.0343518	0.241362
ENSMUSG00000000247	1.9146	0.000180903	0.00425173
ENSMUSG00000000266	-0.807354	0.00126794	0.0217636
ENSMUSG00000000290	1.05531	7.70768e-06	0.00026757
ENSMUSG00000000308	1.01362	6.15545e-05	0.00166899
ENSMUSG00000000318	2.41817	8.4758e-14	1.08123e-11
ENSMUSG00000000320	-0.758841	0.00219757	0.0344301
ENSMUSG00000000325	-0.617317	0.0139662	0.133823
ENSMUSG00000000384	0.537101	0.0195132	0.167148
ENSMUSG00000000386	1.9887	4.55932e-07	2.00307e-05
ENSMUSG00000000392	1.07674	0.0129165	0.126657
ENSMUSG00000000409	0.713238	0.0169806	0.153602
ENSMUSG00000000416	-1.12349	0.00253559	0.0381076
ENSMUSG00000000486	0.728396	0.00428994	0.057319
ENSMUSG00000000530	-0.796141	0.0138939	0.133311
ENSMUSG00000000538	-0.519484	0.0292291	0.217712
ENSMUSG00000000552	1.29622	1.86746e-05	0.000594666
ENSMUSG00000000562	1.21147	2.03083e-05	0.000639953
ENSMUSG00000000567	1.05859	0.00546609	0.0685722
ENSMUSG00000000594	0.500192	0.0158118	0.146589
ENSMUSG00000000617	1.80566	0.00015622	0.00378503
ENSMUSG00000000682	1.64138	3.03453e-07	1.37306e-05
ENSMUSG00000000686	-0.653336	0.0190348	0.164582
ENSMUSG00000000791	1.23671	6.22487e-05	0.00168274
ENSMUSG00000000861	0.953768	0.00139706	0.0234608
ENSMUSG00000000869	0.844841	0.0307629	0.224246
ENSMUSG00000000982	1.989	1.33874e-07	6.44299e-06
ENSMUSG00000001020	1.55341	3.3864e-05	0.00100015
ENSMUSG00000001056	0.88093	0.00384769	0.0528396
ENSMUSG00000001095	1.01412	0.0166587	0.151727
ENSMUSG00000001128	2.77922	1.19205e-30	6.64288e-28
ENSMUSG00000001131	3.98684	3.45902e-36	2.44161e-33
ENSMUSG00000001228	2.59991	4.67403e-15	6.77926e-13
ENSMUSG00000001300	-0.680377	0.00184056	0.0296167
ENSMUSG00000001334	-0.902002	0.0476799	0.291559
ENSMUSG00000001348	2.19283	1.90119e-16	3.1952e-14
ENSMUSG00000001403	2.99727	2.52673e-31	1.48628e-28
ENSMUSG00000001444	0.796908	0.0456104	0.283156
ENSMUSG00000001473	1.40744	3.38449e-10	2.46288e-08
ENSMUSG00000001497	1.39319	0.00454107	NA
ENSMUSG00000001504	-0.547675	0.0216737	0.179633
ENSMUSG00000001506	0.63186	0.0423978	0.272727
ENSMUSG00000001521	-0.476685	0.0400407	0.263733
ENSMUSG00000001525	1.86692	6.26086e-09	3.76648e-07
ENSMUSG00000001588	0.770406	0.0148033	0.13942
ENSMUSG00000001707	0.665077	0.0479401	0.292113
ENSMUSG00000001750	1.00725	4.59902e-05	0.00129805
ENSMUSG00000001768	-0.466207	0.028579	0.214987
ENSMUSG00000001986	-0.73853	0.0158245	0.146589
ENSMUSG00000001999	0.651956	0.0424398	0.272831
ENSMUSG00000002033	0.731361	0.00511196	0.0650155
ENSMUSG00000002055	2.75243	7.31789e-15	1.05417e-12
ENSMUSG00000002068	2.33764	1.38343e-11	1.27372e-09
ENSMUSG00000002111	1.4955	6.83757e-09	4.05581e-07
ENSMUSG00000002228	0.673288	0.0384699	0.258287
ENSMUSG00000002257	0.66115	0.0316129	0.228087
ENSMUSG00000002297	1.12305	4.59461e-05	0.00129805
ENSMUSG00000002458	0.784593	0.000431782	0.00899942
ENSMUSG00000002565	4.32515	5.38132e-40	4.74812e-37
ENSMUSG00000002578	-0.760617	0.00673047	0.0798456
ENSMUSG00000002588	-1.67264	2.38954e-05	0.000734411
ENSMUSG00000002603	0.614335	0.0109323	0.112598
ENSMUSG00000002633	0.60511	0.00753534	0.0865338
ENSMUSG00000002668	0.646036	0.0333037	0.236536
ENSMUSG00000002688	-0.735719	0.000710096	0.0136081
ENSMUSG00000002699	1.4491	7.75697e-07	3.30506e-05
ENSMUSG00000002767	0.486777	0.0368584	0.251616
ENSMUSG00000002769	-0.919133	0.0229969	0.186226
ENSMUSG00000002835	1.1943	1.60417e-05	0.000518625
ENSMUSG00000002870	1.13205	8.58195e-05	0.00223257
ENSMUSG00000002900	-0.520879	0.0163849	0.150361
ENSMUSG00000002944	-0.467841	0.0446728	0.280211
ENSMUSG00000002983	0.669774	0.0182505	0.160512
ENSMUSG00000002992	1.21749	0.018752	0.163181
ENSMUSG00000003051	0.874534	0.00030262	0.00660249
ENSMUSG00000003190	0.616907	0.0179823	0.159328
ENSMUSG00000003206	0.851352	0.002476	0.0376125
ENSMUSG00000003227	-0.810948	0.0328639	0.234319
ENSMUSG00000003228	-0.841742	0.000149711	0.00365661
ENSMUSG00000003355	1.14143	0.000847967	0.0157929
ENSMUSG00000003363	0.9545	9.49522e-06	0.000324308
ENSMUSG00000003411	-1.33193	0.0100177	0.105434
ENSMUSG00000003418	0.770298	0.0201083	0.170735
ENSMUSG00000003420	0.826123	0.00253376	0.0381072
ENSMUSG00000003438	0.539922	0.0134884	0.130664
ENSMUSG00000003484	1.67881	2.25633e-07	1.05011e-05
ENSMUSG00000003500	-0.655261	0.00308474	0.0444069
ENSMUSG00000003518	-0.617457	0.0393998	0.261345
ENSMUSG00000003617	0.66693	0.0288786	0.216115
ENSMUSG00000003746	0.568829	0.013824	0.133062
ENSMUSG00000003779	2.31589	3.42278e-09	2.1444e-07
ENSMUSG00000003824	1.49992	1.00872e-05	0.000343224
ENSMUSG00000003873	0.639779	0.0135765	0.131277
ENSMUSG00000003882	0.884826	0.000321001	0.00693644
ENSMUSG00000004035	-0.953001	0.00242789	0.0370379
ENSMUSG00000004043	0.574041	0.0488927	0.295984
ENSMUSG00000004085	-0.545277	0.0188563	0.163652
ENSMUSG00000004105	-0.537218	0.0182524	0.160512
ENSMUSG00000004207	1.06967	1.67866e-06	6.69441e-05
ENSMUSG00000004264	0.484557	0.0288387	0.216096
ENSMUSG00000004266	0.788647	0.00239136	0.0366686
ENSMUSG00000004317	0.679072	0.0228711	0.185562
ENSMUSG00000004359	1.19018	0.00251671	0.0380127
ENSMUSG00000004446	0.92475	0.000374362	0.00794898
ENSMUSG00000004473	0.992724	0.000176848	0.00417961
ENSMUSG00000004552	0.858259	0.00123846	0.0214086
ENSMUSG00000004558	-0.749364	0.00163236	0.0267545
ENSMUSG00000004609	0.993682	0.000110347	0.00282553
ENSMUSG00000004626	0.546399	0.0216646	0.179628
ENSMUSG00000004631	-0.733388	0.0216832	0.179641
ENSMUSG00000004642	0.557686	0.0228257	0.185468
ENSMUSG00000004655	-0.650142	0.00293663	0.042681
ENSMUSG00000004698	0.958608	0.0137465	0.132376
ENSMUSG00000004707	0.918194	0.00220029	0.034437
ENSMUSG00000004730	1.68153	1.82588e-13	2.18445e-11
ENSMUSG00000004791	0.76853	0.00224554	0.0349902
ENSMUSG00000004798	-0.424401	0.0493634	0.297844
ENSMUSG00000004814	4.18238	1.17648e-36	8.59077e-34
ENSMUSG00000004864	1.22607	2.24362e-08	1.21823e-06
ENSMUSG00000004885	2.49299	1.29974e-06	5.29294e-05
ENSMUSG00000004892	-0.697215	0.0295986	0.218834
ENSMUSG00000004902	0.924948	0.0228648	0.185562
ENSMUSG00000004933	3.2055	8.76463e-28	4.12444e-25
ENSMUSG00000004952	0.659127	0.0122124	0.121985
ENSMUSG00000004988	4.25546	5.80099e-20	1.30683e-17
ENSMUSG00000005054	1.19127	3.17889e-05	0.000941485
ENSMUSG00000005057	1.67634	1.7836e-06	7.05972e-05
ENSMUSG00000005089	-0.605436	0.0288885	0.216115
ENSMUSG00000005142	0.614716	0.0107685	0.111181
ENSMUSG00000005220	1.33487	2.37616e-06	9.09902e-05
ENSMUSG00000005233	2.37617	9.8944e-19	1.99547e-16
ENSMUSG00000005268	-1.13352	0.0193954	0.166552
ENSMUSG00000005338	0.986017	0.0221291	0.182107
ENSMUSG00000005339	1.51403	0.00307638	0.0443166
ENSMUSG00000005360	-0.465578	0.0229961	0.186226
ENSMUSG00000005364	0.808126	0.0394067	0.261345
ENSMUSG00000005410	1.62563	6.09312e-11	5.07984e-09
ENSMUSG00000005413	0.879354	0.00225096	0.0350231
ENSMUSG00000005417	-0.527385	0.0223981	0.183412
ENSMUSG00000005465	0.784279	0.00371565	0.0513594
ENSMUSG00000005470	2.45327	4.9024e-20	1.13114e-17
ENSMUSG00000005540	0.987674	0.00698436	0.0820304
ENSMUSG00000005583	-0.90358	0.0260506	0.202291
ENSMUSG00000005628	-0.744741	0.0202799	0.171848
ENSMUSG00000005667	1.79424	1.5727e-09	1.05391e-07
ENSMUSG00000005698	-0.469831	0.0440368	0.278282
ENSMUSG00000005716	1.64585	0.00138263	0.0232739
ENSMUSG00000005800	0.644238	0.0153796	0.143534
ENSMUSG00000005968	-0.538485	0.0257231	0.200335
ENSMUSG00000006014	0.962262	0.038765	0.259174
ENSMUSG00000006057	-0.735864	0.0250034	0.196976
ENSMUSG00000006127	-0.556075	0.0388088	0.25933
ENSMUSG00000006269	1.94075	1.42215e-06	5.75822e-05
ENSMUSG00000006281	0.628194	0.0321415	0.230721
ENSMUSG00000006301	-0.417063	0.0473404	0.290153
ENSMUSG00000006310	0.91579	0.000474518	0.0097747
ENSMUSG00000006313	-1.95908	7.85528e-08	3.85054e-06
ENSMUSG00000006344	0.833864	0.000683775	0.0131633
ENSMUSG00000006345	-0.896077	0.0127314	0.125512
ENSMUSG00000006360	0.754515	0.0345988	0.242147
ENSMUSG00000006386	-0.721989	0.000760241	0.014374
ENSMUSG00000006392	0.54387	0.0417008	0.269951
ENSMUSG00000006398	2.6407	3.38182e-23	1.08505e-20
ENSMUSG00000006403	1.68531	0.000127064	0.00315442
ENSMUSG00000006442	0.702835	0.00182403	0.0294178
ENSMUSG00000006463	0.718995	0.0216422	0.179583
ENSMUSG00000006494	-0.540774	0.0138532	0.133101
ENSMUSG00000006517	0.875669	4.6035e-05	0.00129805
ENSMUSG00000006519	1.25644	1.38079e-05	0.000454737
ENSMUSG00000006542	-0.878436	0.000579295	0.011551
ENSMUSG00000006567	-0.633109	0.0254958	0.199055
ENSMUSG00000006585	1.47897	1.29169e-09	8.73889e-08
ENSMUSG00000006589	0.839705	0.00231334	0.0357571
ENSMUSG00000006642	-1.06844	0.0127155	0.125414
ENSMUSG00000006651	-0.546214	0.0356758	0.246931
ENSMUSG00000006675	-0.556393	0.0312457	0.226363
ENSMUSG00000006711	-0.830752	0.0478989	0.292112
ENSMUSG00000006715	0.828553	0.010926	0.112588
ENSMUSG00000006731	0.647426	0.0145201	0.137697
ENSMUSG00000006777	-0.555996	0.0297798	0.219574
ENSMUSG00000006800	1.0665	3.14916e-05	0.000935295
ENSMUSG00000006920	-0.502985	0.0296558	0.219118
ENSMUSG00000007029	0.595383	0.0211388	0.176582
ENSMUSG00000007034	0.562205	0.0138383	0.133101
ENSMUSG00000007038	0.463066	0.046268	0.285686
ENSMUSG00000007041	0.610658	0.0189832	0.1644
ENSMUSG00000007050	0.537682	0.0232701	0.187578
ENSMUSG00000007080	1.7631	3.68681e-07	1.6333e-05
ENSMUSG00000007279	-1.3005	7.95973e-05	0.00209126
ENSMUSG00000007379	-0.56928	0.0354827	0.245819
ENSMUSG00000007682	1.49304	0.000168588	0.00403393
ENSMUSG00000007815	0.825802	0.00457051	0.0602273
ENSMUSG00000007833	0.76411	0.000484886	0.00993129
ENSMUSG00000007877	-1.06016	0.0198405	0.169139
ENSMUSG00000007946	1.89452	0.000246026	0.00556608
ENSMUSG00000007989	-0.660095	0.0268919	0.206973
ENSMUSG00000008036	0.641144	0.0360241	0.248252
ENSMUSG00000008193	0.858987	0.0110509	0.113488
ENSMUSG00000008206	-0.973306	3.90555e-05	0.00113464
ENSMUSG00000008226	-0.680319	0.0112454	0.11494
ENSMUSG00000008318	1.38662	1.39919e-05	0.000459369
ENSMUSG00000008496	1.01443	0.00507558	0.0646703
ENSMUSG00000008845	3.16836	1.8784e-27	8.37388e-25
ENSMUSG00000008999	-0.603644	0.0414268	0.269013
ENSMUSG00000009185	7.00825	2.51392e-67	5.91497e-64
ENSMUSG00000009214	2.59638	2.23513e-09	1.46084e-07
ENSMUSG00000009291	-1.30131	0.000386995	0.0081705
ENSMUSG00000009654	0.76451	0.0102065	0.106732
ENSMUSG00000009687	0.611979	0.00502596	0.0643162
ENSMUSG00000009731	0.904742	0.0095645	0.101983
ENSMUSG00000009828	-0.536416	0.0479062	0.292112
ENSMUSG00000010048	0.501635	0.0285491	0.21485
ENSMUSG00000010122	-0.852453	0.0118189	0.119187
ENSMUSG00000010142	0.931706	0.00162192	0.026604
ENSMUSG00000010307	0.907474	5.88976e-05	0.00161348
ENSMUSG00000010797	-0.631474	0.0207514	0.174586
ENSMUSG00000010830	0.769135	0.0246524	0.195447
ENSMUSG00000011008	2.80334	2.74041e-22	8.05985e-20
ENSMUSG00000011034	2.42454	2.45465e-20	6.18807e-18
ENSMUSG00000011171	-1.21848	1.46955e-08	8.23262e-07
ENSMUSG00000011752	0.404942	0.0435804	0.276775
ENSMUSG00000012396	1.00234	0.0445264	0.279789
ENSMUSG00000012428	1.32178	8.92808e-07	3.72902e-05
ENSMUSG00000012443	2.46623	8.071e-14	1.04214e-11
ENSMUSG00000012889	1.46973	2.21358e-05	0.000691369
ENSMUSG00000013076	-0.643677	0.0474135	0.290291
ENSMUSG00000013155	0.735209	0.0154368	0.143689
ENSMUSG00000013338	1.29855	0.00989166	0.104628
ENSMUSG00000013367	1.01542	0.0255022	0.199055
ENSMUSG00000013465	-0.491618	0.0207795	0.174683
ENSMUSG00000013483	-0.691973	0.0343924	0.241557
ENSMUSG00000013611	-1.40844	0.00391783	0.0536029
ENSMUSG00000013707	1.35077	4.05311e-06	0.000149267
ENSMUSG00000013766	1.21653	0.0043796	0.0582187
ENSMUSG00000013846	-0.698367	0.00929794	0.100098
ENSMUSG00000013974	0.758648	0.0273651	0.209351
ENSMUSG00000014158	1.84893	9.01068e-12	8.55651e-10
ENSMUSG00000014243	0.714741	0.028722	0.215642
ENSMUSG00000014361	-0.615403	0.0182672	0.160576
ENSMUSG00000014453	0.775229	0.0362419	0.249094
ENSMUSG00000014496	-0.613134	0.049813	0.299415
ENSMUSG00000014547	0.833048	0.0444188	0.279533
ENSMUSG00000014599	0.600695	0.0210192	0.176
ENSMUSG00000014668	0.483136	0.0249472	0.196966
ENSMUSG00000014813	-0.991131	5.91516e-05	0.00161834
ENSMUSG00000014932	-0.645892	0.0174048	0.155982
ENSMUSG00000015027	0.914757	0.000391474	0.00824862
ENSMUSG00000015112	0.530055	0.0346022	0.242147
ENSMUSG00000015134	4.65028	4.48193e-55	6.77924e-52
ENSMUSG00000015305	-0.570356	0.0456575	0.2832
ENSMUSG00000015314	1.32733	7.37262e-06	0.000257628
ENSMUSG00000015335	0.766569	0.00999507	0.105354
ENSMUSG00000015340	0.927404	0.000523118	0.0105904
ENSMUSG00000015354	-0.691155	0.0157049	0.145735
ENSMUSG00000015355	1.1445	0.00016439	0.00395132
ENSMUSG00000015396	1.45662	1.45496e-11	1.33378e-09
ENSMUSG00000015405	-0.671114	0.0113002	0.115322
ENSMUSG00000015437	1.20599	8.48144e-05	0.00220914
ENSMUSG00000015652	1.40415	0.000622489	0.0121941
ENSMUSG00000015665	1.80838	0.000386029	0.00815823
ENSMUSG00000015709	1.03818	0.00256057	0.0383294
ENSMUSG00000015745	0.834625	0.000200468	0.00464964
ENSMUSG00000015766	0.844543	0.000595131	0.0117891
ENSMUSG00000015776	1.0922	0.0123212	0.122577
ENSMUSG00000015852	1.65332	1.2885e-08	7.27607e-07
ENSMUSG00000015854	3.42424	1.88212e-13	2.23908e-11
ENSMUSG00000015880	2.91206	4.37292e-22	1.25136e-19
ENSMUSG00000015947	1.32051	2.33163e-06	8.94466e-05
ENSMUSG00000015950	1.55358	2.7895e-10	2.08271e-08
ENSMUSG00000015968	-0.752459	0.0106353	0.110128
ENSMUSG00000015981	-0.547636	0.0227739	0.185405
ENSMUSG00000016024	0.619473	0.00461906	0.0607158
ENSMUSG00000016239	-0.544994	0.0425119	0.273016
ENSMUSG00000016256	1.34633	2.48757e-07	1.14628e-05
ENSMUSG00000016283	1.94569	1.76357e-05	0.000564983
ENSMUSG00000016319	0.6418	0.00917325	0.099091
ENSMUSG00000016386	-0.516029	0.044359	0.279401
ENSMUSG00000016487	-0.581635	0.00588549	0.0724376
ENSMUSG00000016495	0.586619	0.0390738	0.260512
ENSMUSG00000016496	0.684545	0.00568272	0.0708365
ENSMUSG00000016498	4.22721	4.64279e-40	4.2746e-37
ENSMUSG00000016529	3.54429	6.41508e-13	6.90275e-11
ENSMUSG00000016664	0.479611	0.0377396	0.255521
ENSMUSG00000016763	-0.761854	0.0363861	0.249622
ENSMUSG00000016933	-0.535375	0.0276771	0.211052
ENSMUSG00000017002	1.27256	0.000314481	0.00683021
ENSMUSG00000017146	1.78157	1.63459e-06	6.54331e-05
ENSMUSG00000017309	-0.573093	0.0441657	0.278753
ENSMUSG00000017344	-0.582709	0.0131369	0.128315
ENSMUSG00000017400	1.86282	1.16354e-08	6.64125e-07
ENSMUSG00000017499	2.24747	2.5679e-10	1.9349e-08
ENSMUSG00000017550	0.920478	0.000803697	0.0150878
ENSMUSG00000017607	1.28823	0.000128613	0.00318538
ENSMUSG00000017652	0.691547	0.00217739	0.0342406
ENSMUSG00000017667	-0.48777	0.0496416	0.298809
ENSMUSG00000017697	1.19298	8.40937e-07	3.56812e-05
ENSMUSG00000017716	3.03121	8.34556e-18	1.57791e-15
ENSMUSG00000017724	1.05447	0.0102755	0.107347
ENSMUSG00000017760	0.747607	0.000400519	0.00841407
ENSMUSG00000017830	0.746696	0.0125312	0.124116
ENSMUSG00000017832	0.942173	0.0405151	0.265866
ENSMUSG00000017861	1.68388	7.34623e-07	3.14907e-05
ENSMUSG00000017929	0.68852	0.0123764	0.122765
ENSMUSG00000017978	-0.529328	0.0191956	0.165239
ENSMUSG00000018001	-0.587409	0.00648882	0.0776688
ENSMUSG00000018008	1.31358	2.05641e-06	8.01963e-05
ENSMUSG00000018143	-0.500217	0.039598	0.262225
ENSMUSG00000018168	0.709186	0.0418969	0.270738
ENSMUSG00000018199	-0.473102	0.0401422	0.264155
ENSMUSG00000018217	-0.768485	0.00188805	0.0303119
ENSMUSG00000018362	0.764822	0.0473588	0.290182
ENSMUSG00000018363	-0.520723	0.0350795	0.244035
ENSMUSG00000018377	-0.495035	0.0304292	0.222897
ENSMUSG00000018379	-0.697082	0.0112464	0.11494
ENSMUSG00000018411	-0.956491	2.64978e-05	0.00079606
ENSMUSG00000018415	-0.85357	0.000116972	0.00293483
ENSMUSG00000018417	-0.433547	0.0495336	0.298494
ENSMUSG00000018427	-0.463827	0.0284558	0.214441
ENSMUSG00000018459	1.16583	0.0156666	0.145444
ENSMUSG00000018486	1.11351	0.0234271	0.188407
ENSMUSG00000018500	0.787266	0.00115744	0.0202729
ENSMUSG00000018507	0.694409	0.00476283	0.0619642
ENSMUSG00000018554	2.17893	2.29652e-05	0.000709944
ENSMUSG00000018585	0.823732	0.00997479	0.105235
ENSMUSG00000018604	-0.572172	0.0461288	0.285287
ENSMUSG00000018740	0.805584	0.00224403	0.0349902
ENSMUSG00000018761	0.470805	0.0413136	0.268826
ENSMUSG00000018774	1.6495	1.83055e-10	1.40449e-08
ENSMUSG00000018800	-0.792882	0.0032663	0.0464209
ENSMUSG00000018849	-0.567454	0.0228135	0.185451
ENSMUSG00000018861	0.713361	0.00933118	0.100254
ENSMUSG00000018893	-1.0574	0.0380213	0.257151
ENSMUSG00000018907	4.6707	1.13264e-26	4.52541e-24
ENSMUSG00000018919	1.77583	0.00023299	0.0052979
ENSMUSG00000018920	0.623374	0.0050266	0.0643162
ENSMUSG00000018924	2.47294	2.0393e-16	3.40033e-14
ENSMUSG00000018927	2.74122	1.80423e-17	3.38109e-15
ENSMUSG00000018930	1.97028	3.03415e-08	1.60228e-06
ENSMUSG00000019102	-0.854912	0.0027264	0.0403736
ENSMUSG00000019122	3.96786	2.109e-39	1.65408e-36
ENSMUSG00000019124	-0.609809	0.0035069	0.048921
ENSMUSG00000019139	0.540489	0.0169553	0.153504
ENSMUSG00000019189	-0.410315	0.0472472	0.28975
ENSMUSG00000019214	1.66651	4.85651e-08	2.45445e-06
ENSMUSG00000019278	-0.959726	0.000459456	0.00950141
ENSMUSG00000019320	1.07183	1.24499e-05	0.00041518
ENSMUSG00000019326	0.593691	0.0181773	0.160298
ENSMUSG00000019359	-0.977474	0.0405719	0.265909
ENSMUSG00000019368	-0.742611	0.000986188	0.0179258
ENSMUSG00000019539	0.580595	0.0182046	0.160358
ENSMUSG00000019558	0.47253	0.0382221	0.257522
ENSMUSG00000019577	-0.776484	0.00569007	0.0708365
ENSMUSG00000019647	-0.597652	0.0256416	0.199922
ENSMUSG00000019699	-0.875152	2.5761e-05	0.000780421
ENSMUSG00000019762	-1.28482	2.54951e-05	0.000774582
ENSMUSG00000019773	1.38595	3.0006e-08	1.58852e-06
ENSMUSG00000019817	-1.03709	0.0209912	0.175915
ENSMUSG00000019820	-0.769642	0.0227948	0.185405
ENSMUSG00000019832	1.10621	4.88747e-06	0.00017783
ENSMUSG00000019845	0.83076	0.0169794	0.153602
ENSMUSG00000019853	1.36268	2.88964e-05	0.000864281
ENSMUSG00000019889	-0.564581	0.0178464	0.158788
ENSMUSG00000019894	-0.966861	0.00486175	0.062891
ENSMUSG00000019899	-0.600916	0.0451964	0.281411
ENSMUSG00000019942	2.74836	4.89416e-17	8.5748e-15
ENSMUSG00000019943	-0.7018	0.0362694	0.249182
ENSMUSG00000019951	0.520308	0.0262806	0.203554
ENSMUSG00000019978	-0.531593	0.0251763	0.19749
ENSMUSG00000019982	0.691175	0.00149029	0.0248296
ENSMUSG00000019987	6.32308	1.60238e-103	1.6966e-99
ENSMUSG00000019989	1.01148	0.000388691	0.00819812
ENSMUSG00000020000	2.01673	1.16239e-05	0.000390711
ENSMUSG00000020009	-0.80565	0.000441683	0.00918771
ENSMUSG00000020010	0.634152	0.0412783	0.268826
ENSMUSG00000020017	4.37803	1.35216e-66	2.86333e-63
ENSMUSG00000020018	0.917488	0.00564253	0.0704933
ENSMUSG00000020019	-0.769581	0.000641782	0.0125027
ENSMUSG00000020023	-0.703852	0.00245005	0.0372985
ENSMUSG00000020053	1.89991	1.86253e-12	1.87814e-10
ENSMUSG00000020059	-0.975574	0.00968555	0.102756
ENSMUSG00000020072	0.795674	0.00272494	0.0403736
ENSMUSG00000020077	0.659691	0.0479498	0.292113
ENSMUSG00000020089	0.68047	0.0259891	0.202035
ENSMUSG00000020120	1.01166	0.000764323	0.0144383
ENSMUSG00000020143	0.85922	0.00274802	0.0405802
ENSMUSG00000020154	-0.810496	0.00449478	0.0594885
ENSMUSG00000020169	-0.731235	0.029059	0.216674
ENSMUSG00000020173	-0.649455	0.00244999	0.0372985
ENSMUSG00000020177	-1.08949	0.0305591	0.22353
ENSMUSG00000020182	-0.725657	0.0119816	0.120381
ENSMUSG00000020183	-0.778159	0.00329394	0.046678
ENSMUSG00000020185	2.33513	6.66372e-10	4.67255e-08
ENSMUSG00000020241	0.740059	0.00656177	0.0782829
ENSMUSG00000020261	1.22734	0.0053699	0.0678478
ENSMUSG00000020265	0.563694	0.0125514	0.124258
ENSMUSG00000020279	1.18757	0.00206798	0.0328027
ENSMUSG00000020284	0.497418	0.048174	0.293061
ENSMUSG00000020295	-1.36732	0.00514082	NA
ENSMUSG00000020307	0.677298	0.0154411	0.143689
ENSMUSG00000020310	1.58185	0.00159801	NA
ENSMUSG00000020315	-0.781436	0.00510407	0.0649542
ENSMUSG00000020328	0.689236	0.00712637	0.0831908
ENSMUSG00000020330	2.78953	2.31427e-16	3.76977e-14
ENSMUSG00000020334	1.09884	0.00515044	0.0654264
ENSMUSG00000020374	-1.1416	0.0201665	0.171092
ENSMUSG00000020377	1.13166	0.00130949	0.0222729
ENSMUSG00000020383	5.18578	6.81243e-29	3.27864e-26
ENSMUSG00000020387	-0.483156	0.0453734	0.282145
ENSMUSG00000020388	1.4602	4.27183e-07	1.88459e-05
ENSMUSG00000020399	1.16621	0.00325528	0.0463266
ENSMUSG00000020413	-0.513215	0.0369967	0.252235
ENSMUSG00000020415	1.77356	1.71059e-07	8.04965e-06
ENSMUSG00000020422	-0.663467	0.00381923	0.0525852
ENSMUSG00000020423	-0.605042	0.0108675	0.112122
ENSMUSG00000020427	-1.1722	4.12018e-06	0.000151211
ENSMUSG00000020437	1.23237	5.31542e-05	0.00146753
ENSMUSG00000020440	0.528667	0.0408839	0.267038
ENSMUSG00000020469	-1.17439	0.0229807	0.186226
ENSMUSG00000020486	-0.566176	0.0454766	0.282491
ENSMUSG00000020493	1.97709	6.32523e-09	3.79442e-07
ENSMUSG00000020519	-0.652644	0.00137445	0.0231546
ENSMUSG00000020524	-1.25931	7.57702e-09	4.45697e-07
ENSMUSG00000020534	0.764057	0.00298328	0.0432403
ENSMUSG00000020571	0.585168	0.0280132	0.212467
ENSMUSG00000020573	0.553215	0.0321092	0.230603
ENSMUSG00000020581	2.46515	1.91666e-06	7.53009e-05
ENSMUSG00000020589	-1.09579	0.00232911	0.0359452
ENSMUSG00000020604	0.548911	0.0322714	0.231184
ENSMUSG00000020609	1.32139	0.00433128	0.0577577
ENSMUSG00000020620	-0.830376	0.00118008	0.0205844
ENSMUSG00000020623	-0.693912	0.00861499	0.0950161
ENSMUSG00000020642	-1.3196	4.70854e-05	0.00132414
ENSMUSG00000020649	2.64637	1.80878e-21	5.03983e-19
ENSMUSG00000020650	0.954301	0.000637752	0.012447
ENSMUSG00000020651	5.87297	1.53594e-136	3.25251e-132
ENSMUSG00000020658	-0.589381	0.0248982	0.196829
ENSMUSG00000020668	-1.09797	1.81521e-06	7.17145e-05
ENSMUSG00000020674	-0.553226	0.0178101	0.15859
ENSMUSG00000020676	4.0342	1.30763e-39	1.10762e-36
ENSMUSG00000020681	-0.637052	0.0435034	0.276412
ENSMUSG00000020682	-0.686402	0.021016	0.176
ENSMUSG00000020702	1.51399	0.0023306	0.0359452
ENSMUSG00000020717	-0.56279	0.00616097	0.0748718
ENSMUSG00000020728	-0.631087	0.023859	0.190728
ENSMUSG00000020732	1.11126	0.000115577	0.00291017
ENSMUSG00000020734	-0.517542	0.044555	0.279816
ENSMUSG00000020737	0.836713	0.00130794	0.0222645
ENSMUSG00000020744	0.58962	0.0229874	0.186226
ENSMUSG00000020787	1.40635	5.81873e-08	2.90607e-06
ENSMUSG00000020798	2.24102	1.86083e-09	1.23526e-07
ENSMUSG00000020805	2.28189	1.03156e-05	0.000350069
ENSMUSG00000020808	2.77488	4.80133e-13	5.27034e-11
ENSMUSG00000020810	0.551262	0.0220867	0.1819
ENSMUSG00000020814	-0.432981	0.0400201	0.263679
ENSMUSG00000020821	-0.593378	0.0288899	0.216115
ENSMUSG00000020836	-0.99068	0.0138519	0.133101
ENSMUSG00000020857	0.794139	0.00587027	0.0723854
ENSMUSG00000020865	-0.655334	0.0182873	0.160686
ENSMUSG00000020866	-1.31374	0.00744044	0.0858163
ENSMUSG00000020883	-0.472083	0.0482345	0.293173
ENSMUSG00000020884	-1.72855	0.000156954	0.0037942
ENSMUSG00000020891	1.37527	0.00781909	0.0891122
ENSMUSG00000020897	3.03209	5.61853e-29	2.76693e-26
ENSMUSG00000020900	-0.667067	0.0210592	0.176265
ENSMUSG00000020901	1.23375	1.22301e-05	0.000408493
ENSMUSG00000020914	2.69745	7.54673e-19	1.55155e-16
ENSMUSG00000020974	0.865635	0.0101241	0.106291
ENSMUSG00000021032	-1.40357	1.85181e-05	0.00059057
ENSMUSG00000021033	-0.822025	0.00331714	0.0468605
ENSMUSG00000021055	-1.15051	0.00016429	0.00395132
ENSMUSG00000021062	0.593495	0.016633	0.151608
ENSMUSG00000021070	-0.619161	0.0211626	0.176641
ENSMUSG00000021090	-1.15252	0.0259318	0.201739
ENSMUSG00000021091	2.58237	1.12847e-29	5.82842e-27
ENSMUSG00000021108	-0.568882	0.0121864	0.121786
ENSMUSG00000021112	-0.801757	0.00681218	0.0805442
ENSMUSG00000021115	0.799422	0.00136841	0.0230897
ENSMUSG00000021125	0.830624	0.00217965	0.0342406
ENSMUSG00000021156	-0.794898	0.0288776	0.216115
ENSMUSG00000021175	0.707399	0.00861396	0.0950161
ENSMUSG00000021176	0.986514	0.00482906	0.0626211
ENSMUSG00000021190	1.29419	1.56875e-07	7.46512e-06
ENSMUSG00000021203	-0.675719	0.00749133	0.0862623
ENSMUSG00000021214	3.18012	5.21942e-10	3.68422e-08
ENSMUSG00000021224	-0.487003	0.0287685	0.2158
ENSMUSG00000021236	-0.576966	0.0393347	0.261086
ENSMUSG00000021262	0.546743	0.0167364	0.152238
ENSMUSG00000021265	-0.509587	0.0285506	0.21485
ENSMUSG00000021268	0.708615	0.0235947	0.18933
ENSMUSG00000021278	0.870414	0.0491519	NA
ENSMUSG00000021281	0.80309	0.00836928	0.0931798
ENSMUSG00000021298	0.836361	0.00407603	0.0552233
ENSMUSG00000021302	-0.642529	0.00798382	0.090361
ENSMUSG00000021313	-1.20315	0.00662814	0.0788525
ENSMUSG00000021314	-0.654946	0.00397111	0.0540786
ENSMUSG00000021319	2.24675	1.51735e-12	1.56738e-10
ENSMUSG00000021322	1.33423	7.20905e-05	0.00192024
ENSMUSG00000021338	-0.792796	0.00334926	0.0471882
ENSMUSG00000021356	1.68624	9.01937e-11	7.18072e-09
ENSMUSG00000021360	-0.548982	0.010587	0.109789
ENSMUSG00000021361	0.738331	0.0206752	0.174014
ENSMUSG00000021384	1.35971	1.69168e-06	6.71406e-05
ENSMUSG00000021390	-0.69306	0.0180468	0.159679
ENSMUSG00000021391	1.59445	0.00012132	0.00302243
ENSMUSG00000021411	-0.693111	0.00322678	0.0460137
ENSMUSG00000021423	2.16326	1.81376e-14	2.51033e-12
ENSMUSG00000021451	0.767812	0.00955012	0.101956
ENSMUSG00000021453	1.2961	7.07735e-08	3.49347e-06
ENSMUSG00000021457	0.922883	0.000754801	0.0142967
ENSMUSG00000021474	0.563847	0.00912627	0.0988868
ENSMUSG00000021476	-0.574825	0.0190837	0.164811
ENSMUSG00000021482	-0.589529	0.0131755	0.128574
ENSMUSG00000021485	2.87415	6.34812e-24	2.10043e-21
ENSMUSG00000021486	0.471832	0.0449727	0.280818
ENSMUSG00000021506	1.25008	0.0153391	0.14325
ENSMUSG00000021536	-0.512965	0.0344933	0.241784
ENSMUSG00000021559	0.604852	0.0409989	0.26763
ENSMUSG00000021565	1.4243	0.00501158	0.0642015
ENSMUSG00000021569	1.61948	9.81371e-09	5.66284e-07
ENSMUSG00000021573	-0.917421	0.0047313	0.0617314
ENSMUSG00000021587	0.998671	0.00796643	0.0902606
ENSMUSG00000021591	0.807621	0.00404482	0.0548769
ENSMUSG00000021608	-0.68494	0.0405426	0.265909
ENSMUSG00000021614	1.6449	1.33182e-05	0.000439979
ENSMUSG00000021624	0.807842	0.00811948	0.0912139
ENSMUSG00000021640	1.94073	5.47961e-05	0.00150958
ENSMUSG00000021662	-1.02507	0.000385289	0.00815073
ENSMUSG00000021665	1.01848	0.00023833	0.00540931
ENSMUSG00000021669	-0.81072	0.0129193	0.126657
ENSMUSG00000021684	-0.743708	0.000341002	0.00731617
ENSMUSG00000021690	-0.550672	0.0449137	0.280818
ENSMUSG00000021697	1.67127	1.0545e-08	6.05154e-07
ENSMUSG00000021702	1.37559	0.00439789	0.0584012
ENSMUSG00000021704	-0.567656	0.0182023	0.160358
ENSMUSG00000021707	0.968859	0.000219646	0.00502292
ENSMUSG00000021708	-0.583748	0.0441132	0.278539
ENSMUSG00000021714	1.92158	1.78399e-05	0.000569801
ENSMUSG00000021720	0.954233	0.000182946	0.00428547
ENSMUSG00000021730	1.09645	0.00234225	0.0360986
ENSMUSG00000021749	5.05736	2.5947e-27	1.07736e-24
ENSMUSG00000021750	-0.86345	0.00691148	0.081355
ENSMUSG00000021759	-0.597419	0.0152821	0.142812
ENSMUSG00000021763	-0.619819	0.0493688	0.297844
ENSMUSG00000021765	1.27795	3.24384e-06	0.000121578
ENSMUSG00000021768	1.5557	0.00231322	0.0357571
ENSMUSG00000021773	0.833988	0.00181802	0.0293656
ENSMUSG00000021790	-1.20577	0.019489	0.167084
ENSMUSG00000021795	0.941359	0.000116073	0.00291573
ENSMUSG00000021798	-0.783346	0.0469582	0.288563
ENSMUSG00000021811	0.484235	0.0459499	0.284491
ENSMUSG00000021823	-0.674011	0.029703	0.21916
ENSMUSG00000021838	-0.604563	0.0386079	0.258445
ENSMUSG00000021880	0.772325	0.0100434	0.105653
ENSMUSG00000021886	1.91577	3.99584e-14	5.32175e-12
ENSMUSG00000021892	-0.566804	0.0146808	0.138874
ENSMUSG00000021903	-1.36212	1.44934e-07	6.94369e-06
ENSMUSG00000021904	-0.487198	0.0292829	0.217806
ENSMUSG00000021913	1.40347	0.000972473	0.0177527
ENSMUSG00000021922	0.884357	2.19942e-05	0.000688978
ENSMUSG00000021932	0.864727	0.00311391	0.0446858
ENSMUSG00000021939	1.27211	2.48969e-09	1.61723e-07
ENSMUSG00000021948	0.866984	0.000510322	0.0104009
ENSMUSG00000021957	0.644625	0.0047667	0.0619642
ENSMUSG00000021959	-0.583269	0.0047841	0.0621522
ENSMUSG00000021965	2.26119	2.77258e-09	1.77378e-07
ENSMUSG00000021978	-0.766556	0.00169865	0.0276696
ENSMUSG00000021982	-0.518662	0.0218886	0.180848
ENSMUSG00000021991	-1.07326	0.0345905	0.242147
ENSMUSG00000021994	0.480868	0.0288055	0.215924
ENSMUSG00000021998	0.895737	0.000222363	0.00507408
ENSMUSG00000022010	-0.609926	0.0184586	0.161628
ENSMUSG00000022014	1.31183	1.64371e-06	6.5674e-05
ENSMUSG00000022015	1.92764	6.88868e-06	0.00024272
ENSMUSG00000022021	1.78096	4.9476e-06	0.000179401
ENSMUSG00000022033	3.17034	2.85591e-17	5.25884e-15
ENSMUSG00000022034	2.6559	9.82671e-13	1.04045e-10
ENSMUSG00000022070	1.0637	0.000156957	0.0037942
ENSMUSG00000022094	0.862003	0.000375614	0.00795401
ENSMUSG00000022099	-0.623201	0.00714882	0.0833609
ENSMUSG00000022102	1.66382	6.62449e-10	4.66047e-08
ENSMUSG00000022111	0.759513	0.0203826	0.172396
ENSMUSG00000022123	-0.617659	0.00507565	0.0646703
ENSMUSG00000022126	4.20247	3.98277e-20	9.47631e-18
ENSMUSG00000022144	-0.634193	0.0249892	0.196966
ENSMUSG00000022150	0.75554	0.0279283	0.212053
ENSMUSG00000022157	3.26295	6.24747e-22	1.76395e-19
ENSMUSG00000022177	0.594366	0.0410651	0.26782
ENSMUSG00000022180	1.37274	4.30215e-05	0.00123445
ENSMUSG00000022216	0.530587	0.0420612	0.271138
ENSMUSG00000022218	2.05103	1.72089e-14	2.39748e-12
ENSMUSG00000022220	-0.588389	0.0304559	0.222967
ENSMUSG00000022221	0.611253	0.00923356	0.0996076
ENSMUSG00000022225	1.08072	0.00445874	0.0590612
ENSMUSG00000022226	1.22457	0.0107053	0.1108
ENSMUSG00000022227	3.26165	1.99029e-12	1.99746e-10
ENSMUSG00000022272	-0.636784	0.00908054	0.0985954
ENSMUSG00000022292	-0.583588	0.0158429	0.146589
ENSMUSG00000022297	-0.510312	0.0174805	0.156453
ENSMUSG00000022303	2.53327	6.41536e-09	3.8268e-07
ENSMUSG00000022309	-0.828828	0.000233171	0.0052979
ENSMUSG00000022322	2.48482	3.18002e-13	3.67834e-11
ENSMUSG00000022346	1.35052	3.91826e-09	2.43323e-07
ENSMUSG00000022357	-0.94415	0.0153984	0.143646
ENSMUSG00000022360	0.991423	9.7678e-05	0.00251634
ENSMUSG00000022364	0.859767	0.000658377	0.0127322
ENSMUSG00000022367	1.06434	0.00587601	0.0723854
ENSMUSG00000022372	0.910407	0.000870698	0.0161736
ENSMUSG00000022376	-0.615986	0.00932481	0.100254
ENSMUSG00000022378	1.00012	0.000462886	0.00956299
ENSMUSG00000022383	-0.969037	0.00678014	0.0803041
ENSMUSG00000022385	2.23595	1.8037e-08	9.94666e-07
ENSMUSG00000022391	0.536854	0.0112697	0.115067
ENSMUSG00000022408	0.801497	0.0469004	0.288291
ENSMUSG00000022422	2.3322	1.80025e-08	9.94666e-07
ENSMUSG00000022436	0.647743	0.0361606	0.248777
ENSMUSG00000022438	-0.666923	0.0121384	0.121495
ENSMUSG00000022440	0.450267	0.0449818	0.280818
ENSMUSG00000022441	-0.74851	0.0102658	0.1073
ENSMUSG00000022464	-0.946591	0.000108929	0.00279938
ENSMUSG00000022479	0.56451	0.0238478	0.190711
ENSMUSG00000022483	-0.976291	0.0307105	0.224173
ENSMUSG00000022488	1.05503	2.18687e-05	0.000687079
ENSMUSG00000022500	0.814237	0.000221035	0.00504923
ENSMUSG00000022503	0.538195	0.0185376	0.161997
ENSMUSG00000022504	1.49712	1.00977e-05	0.000343224
ENSMUSG00000022505	-0.712538	0.00109744	0.0195125
ENSMUSG00000022534	1.59963	6.03244e-05	0.00164617
ENSMUSG00000022537	-0.592155	0.0168078	0.152691
ENSMUSG00000022570	0.484021	0.047832	0.292057
ENSMUSG00000022571	0.703976	0.018811	0.163523
ENSMUSG00000022574	0.810202	0.0023545	0.0362346
ENSMUSG00000022586	1.5741	6.80531e-05	0.00181956
ENSMUSG00000022595	1.40295	0.000213217	0.00489706
ENSMUSG00000022607	-0.480774	0.0190304	0.164582
ENSMUSG00000022650	4.51467	2.6935e-20	6.63228e-18
ENSMUSG00000022651	1.87727	3.72948e-08	1.93567e-06
ENSMUSG00000022656	-0.446838	0.0374293	0.254529
ENSMUSG00000022657	0.614867	0.0166385	0.151608
ENSMUSG00000022665	1.06548	0.000794938	0.0149367
ENSMUSG00000022667	1.97374	2.37072e-11	2.07448e-09
ENSMUSG00000022673	0.667134	0.00653096	0.0779591
ENSMUSG00000022679	-1.07697	0.000968491	0.0177258
ENSMUSG00000022708	-1.04579	0.0104615	0.108968
ENSMUSG00000022724	0.486564	0.0424224	0.272802
ENSMUSG00000022756	-0.699118	0.00752052	0.0864702
ENSMUSG00000022762	-1.01323	0.0444727	0.279618
ENSMUSG00000022769	2.01485	2.43219e-14	3.32285e-12
ENSMUSG00000022779	-1.03174	0.0085132	0.0943357
ENSMUSG00000022793	-0.496258	0.0211096	0.176438
ENSMUSG00000022797	0.715087	0.00470406	0.0615276
ENSMUSG00000022803	-0.79558	0.00388381	0.0531976
ENSMUSG00000022831	1.04874	1.04367e-05	0.000353611
ENSMUSG00000022841	0.525955	0.0235159	0.188889
ENSMUSG00000022842	0.64105	0.035462	0.245808
ENSMUSG00000022860	1.73184	0.000818521	0.0153118
ENSMUSG00000022868	2.14643	3.07666e-09	1.95064e-07
ENSMUSG00000022871	1.59937	2.94352e-08	1.57008e-06
ENSMUSG00000022876	1.53416	3.76472e-10	2.70243e-08
ENSMUSG00000022881	1.35274	4.40568e-05	0.00125734
ENSMUSG00000022893	-0.491052	0.0438314	0.277564
ENSMUSG00000022901	1.04109	0.000175197	0.00415449
ENSMUSG00000022905	-0.917019	0.0150675	0.141432
ENSMUSG00000022945	1.29384	2.39943e-07	1.11182e-05
ENSMUSG00000022947	0.77182	0.00494199	0.0635793
ENSMUSG00000022960	0.483823	0.0348383	0.243317
ENSMUSG00000022965	0.460281	0.0317319	0.228634
ENSMUSG00000022978	0.697436	0.014378	0.137025
ENSMUSG00000022987	-0.744743	0.0100679	0.105858
ENSMUSG00000022996	-0.650594	0.0267203	0.206256
ENSMUSG00000023004	0.609044	0.0436881	0.276905
ENSMUSG00000023011	-1.08036	0.00404528	0.0548769
ENSMUSG00000023015	1.94538	3.19614e-13	3.67834e-11
ENSMUSG00000023019	0.51055	0.0494477	0.298222
ENSMUSG00000023031	1.78786	4.98192e-05	0.0013863
ENSMUSG00000023045	2.45051	6.25305e-07	2.70234e-05
ENSMUSG00000023048	0.495095	0.0344417	0.241762
ENSMUSG00000023051	0.59688	0.0168938	0.153221
ENSMUSG00000023067	-0.59285	0.00452618	0.0598665
ENSMUSG00000023078	3.53726	1.10223e-24	3.70491e-22
ENSMUSG00000023087	0.544289	0.0139396	0.133689
ENSMUSG00000023092	-0.58975	0.0105456	0.10954
ENSMUSG00000023169	0.731504	0.00716094	0.0834563
ENSMUSG00000023247	1.31386	0.00971028	0.102915
ENSMUSG00000023262	0.523761	0.033795	0.239084
ENSMUSG00000023272	0.593953	0.0192611	0.165658
ENSMUSG00000023277	0.497702	0.0316081	0.228087
ENSMUSG00000023345	0.682073	0.0209801	0.175915
ENSMUSG00000023349	0.670279	0.0449186	0.280818
ENSMUSG00000023367	0.780964	0.000408057	0.00854699
ENSMUSG00000023393	0.93365	0.00723814	0.0841244
ENSMUSG00000023460	-0.483107	0.0440214	0.278268
ENSMUSG00000023473	1.0295	0.0180923	0.159834
ENSMUSG00000023505	3.10907	1.53224e-23	4.99181e-21
ENSMUSG00000023809	-0.657095	0.0325983	0.232901
ENSMUSG00000023845	-0.462728	0.0364706	0.249935
ENSMUSG00000023903	2.02953	8.46885e-08	4.14172e-06
ENSMUSG00000023908	1.46106	2.02663e-08	1.10608e-06
ENSMUSG00000023913	1.53016	6.54637e-11	5.41508e-09
ENSMUSG00000023919	1.01458	0.00198191	0.0316508
ENSMUSG00000023940	2.60774	8.44506e-14	1.08123e-11
ENSMUSG00000023947	1.10095	1.31407e-05	0.000435472
ENSMUSG00000023951	-0.463299	0.0247088	0.195821
ENSMUSG00000023959	-0.632899	0.0237412	0.189948
ENSMUSG00000023961	-0.478375	0.0212147	0.17696
ENSMUSG00000023971	0.580376	0.0296988	0.21916
ENSMUSG00000023982	1.1318	0.00930428	0.100116
ENSMUSG00000023992	3.16981	1.89812e-27	8.37388e-25
ENSMUSG00000024013	0.86831	0.000899008	0.0166411
ENSMUSG00000024014	1.11971	2.15108e-06	8.37339e-05
ENSMUSG00000024028	4.56818	1.50846e-25	5.4141e-23
ENSMUSG00000024030	0.47213	0.0392208	0.260521
ENSMUSG00000024032	1.47353	0.00297041	NA
ENSMUSG00000024039	-1.4194	3.90608e-05	0.00113464
ENSMUSG00000024041	4.36903	4.89335e-19	1.0159e-16
ENSMUSG00000024043	-0.473812	0.0375565	0.254927
ENSMUSG00000024044	-0.658989	0.0139567	0.133792
ENSMUSG00000024052	-0.888253	0.0270417	0.207476
ENSMUSG00000024053	1.30086	8.22873e-06	0.000285191
ENSMUSG00000024056	2.21785	1.05873e-11	9.96431e-10
ENSMUSG00000024065	-0.587449	0.0436615	0.276905
ENSMUSG00000024074	-0.537299	0.0178574	0.158793
ENSMUSG00000024084	0.825991	0.00948334	0.101424
ENSMUSG00000024087	0.765	0.025262	0.197755
ENSMUSG00000024098	-0.636373	0.00309035	0.0444151
ENSMUSG00000024121	0.637232	0.022524	0.184087
ENSMUSG00000024124	1.43717	0.000432567	0.00900692
ENSMUSG00000024131	-1.05517	0.0398005	0.262887
ENSMUSG00000024164	1.81592	1.54148e-09	1.03627e-07
ENSMUSG00000024168	-0.617174	0.00696878	0.0819197
ENSMUSG00000024177	1.06236	0.00082358	0.0153929
ENSMUSG00000024190	-0.787301	0.00571684	0.0710444
ENSMUSG00000024194	0.625839	0.0320615	0.230484
ENSMUSG00000024209	0.911235	0.0330973	0.23547
ENSMUSG00000024215	1.61639	3.78944e-05	0.00110989
ENSMUSG00000024220	-0.75102	0.0128855	0.12656
ENSMUSG00000024238	-0.591138	0.0201241	0.170801
ENSMUSG00000024242	-0.479884	0.0246092	0.195324
ENSMUSG00000024300	1.02405	0.000208506	0.00479927
ENSMUSG00000024301	1.7055	2.73196e-09	1.75309e-07
ENSMUSG00000024330	0.773713	0.0215448	0.179125
ENSMUSG00000024338	0.816015	0.00649563	0.0776688
ENSMUSG00000024340	0.90961	0.0268978	0.206973
ENSMUSG00000024349	1.23263	1.59762e-07	7.57657e-06
ENSMUSG00000024352	0.708384	0.0195373	0.167228
ENSMUSG00000024353	1.21831	0.00140064	0.0235024
ENSMUSG00000024376	-0.736784	0.00224963	0.0350231
ENSMUSG00000024397	2.16626	3.31022e-10	2.42551e-08
ENSMUSG00000024399	0.863443	0.00743299	0.0858163
ENSMUSG00000024401	1.87777	1.17168e-08	6.66974e-07
ENSMUSG00000024402	0.971092	0.0096503	0.102485
ENSMUSG00000024424	1.05297	9.32308e-05	0.00241057
ENSMUSG00000024427	-0.488596	0.0446196	0.280126
ENSMUSG00000024440	-0.702775	0.0300569	0.220848
ENSMUSG00000024480	0.715893	0.0174636	0.156395
ENSMUSG00000024500	-0.756927	0.00841131	0.0935003
ENSMUSG00000024516	0.635739	0.0241556	0.192445
ENSMUSG00000024525	0.966051	0.00215947	0.0339993
ENSMUSG00000024526	-0.872701	0.013405	0.130168
ENSMUSG00000024534	-0.6954	0.0226121	0.184451
ENSMUSG00000024539	0.58552	0.0252265	0.197704
ENSMUSG00000024556	0.542157	0.0115754	0.117299
ENSMUSG00000024575	1.03948	0.000302684	0.00660249
ENSMUSG00000024579	0.56173	0.0245539	0.194958
ENSMUSG00000024589	-0.55276	0.0261212	0.202691
ENSMUSG00000024590	1.23537	2.14064e-07	1.0051e-05
ENSMUSG00000024593	-1.07631	0.0172131	0.154888
ENSMUSG00000024610	1.0507	4.20715e-05	0.00121212
ENSMUSG00000024620	-0.58456	0.0338292	0.239108
ENSMUSG00000024621	1.09759	1.31702e-06	5.35303e-05
ENSMUSG00000024640	0.874683	0.00536722	0.0678478
ENSMUSG00000024642	-1.32943	5.28766e-05	0.00146177
ENSMUSG00000024644	0.600118	0.0251806	0.19749
ENSMUSG00000024660	1.45476	1.14722e-07	5.55917e-06
ENSMUSG00000024663	2.46668	7.13695e-20	1.59086e-17
ENSMUSG00000024669	1.12607	7.6195e-05	0.00201688
ENSMUSG00000024670	0.986341	0.00265443	0.039529
ENSMUSG00000024672	3.01843	9.79653e-16	1.52538e-13
ENSMUSG00000024673	0.896585	0.00315473	0.0451329
ENSMUSG00000024675	0.886123	0.00153723	0.0254515
ENSMUSG00000024677	0.631125	0.00683816	0.0807652
ENSMUSG00000024678	-0.783915	0.000465934	0.00961659
ENSMUSG00000024679	2.73452	8.52229e-26	3.16611e-23
ENSMUSG00000024682	1.26205	0.00959774	0.102151
ENSMUSG00000024696	1.90363	4.83923e-09	2.96172e-07
ENSMUSG00000024730	1.66392	9.7474e-07	4.03146e-05
ENSMUSG00000024737	0.73957	0.00304891	0.0439682
ENSMUSG00000024754	-0.788197	0.000250841	0.00565087
ENSMUSG00000024764	0.443372	0.0433573	0.276048
ENSMUSG00000024769	-0.768412	0.00893843	0.0976423
ENSMUSG00000024770	1.85009	0.000319026	0.00690766
ENSMUSG00000024791	2.72075	4.163e-15	6.07971e-13
ENSMUSG00000024795	1.59257	1.93355e-05	0.000613866
ENSMUSG00000024798	2.14882	1.38769e-05	0.000456301
ENSMUSG00000024803	-0.713004	0.00669908	0.0795624
ENSMUSG00000024810	1.13318	0.000321166	0.00693644
ENSMUSG00000024833	0.581621	0.0159144	0.146971
ENSMUSG00000024892	0.714906	0.00697107	0.0819197
ENSMUSG00000024899	-0.548124	0.0144786	0.13755
ENSMUSG00000024921	-0.755125	0.00851911	0.0943518
ENSMUSG00000024924	-0.805276	0.000247358	0.00559025
ENSMUSG00000024937	0.657301	0.00355996	0.0495307
ENSMUSG00000024965	1.17701	4.47549e-05	0.00127041
ENSMUSG00000024972	0.69024	0.00908385	0.0985954
ENSMUSG00000024989	2.74058	6.29273e-18	1.20049e-15
ENSMUSG00000024998	-0.716011	0.0176326	0.157481
ENSMUSG00000025001	1.95257	5.67771e-12	5.51519e-10
ENSMUSG00000025006	-0.719429	0.0060611	0.0739342
ENSMUSG00000025007	1.07027	4.60057e-05	0.00129805
ENSMUSG00000025027	0.432511	0.0420262	0.270995
ENSMUSG00000025044	2.17663	1.64715e-11	1.497e-09
ENSMUSG00000025058	0.944658	0.0132505	0.128962
ENSMUSG00000025064	-0.455213	0.0471006	0.28916
ENSMUSG00000025068	0.952658	0.000117132	0.00293537
ENSMUSG00000025089	-1.02467	6.4829e-05	0.00173995
ENSMUSG00000025092	-0.614821	0.031257	0.226367
ENSMUSG00000025104	-0.423656	0.0487633	0.295793
ENSMUSG00000025105	-0.766195	0.0347683	0.243068
ENSMUSG00000025134	0.560492	0.0230922	0.186712
ENSMUSG00000025140	1.4926	5.8031e-05	0.00159179
ENSMUSG00000025154	1.39635	1.72055e-05	0.000552873
ENSMUSG00000025161	0.933886	0.00113516	0.019936
ENSMUSG00000025163	0.681755	0.03011	0.221162
ENSMUSG00000025165	1.71657	0.000807022	0.0151101
ENSMUSG00000025188	0.703397	0.0136109	0.131387
ENSMUSG00000025192	0.488292	0.049547	0.298494
ENSMUSG00000025213	-0.660695	0.0160135	0.147692
ENSMUSG00000025217	-0.502383	0.0178094	0.15859
ENSMUSG00000025225	0.85802	0.000547943	0.0109671
ENSMUSG00000025226	0.554032	0.0271402	0.208157
ENSMUSG00000025227	0.595821	0.00846765	0.0938801
ENSMUSG00000025232	0.946222	0.000207179	0.0047739
ENSMUSG00000025237	-0.47844	0.0444195	0.279533
ENSMUSG00000025270	-0.738834	0.00232944	0.0359452
ENSMUSG00000025279	1.22462	0.00110521	0.0196178
ENSMUSG00000025289	0.842016	0.00832197	0.0930358
ENSMUSG00000025321	1.07405	0.000616677	0.0121026
ENSMUSG00000025348	0.842338	0.00189542	0.0303841
ENSMUSG00000025351	0.738708	0.00881496	0.0966584
ENSMUSG00000025355	1.59737	4.20889e-07	1.8607e-05
ENSMUSG00000025395	0.810029	0.00706036	0.082648
ENSMUSG00000025403	0.636385	0.00824369	0.092462
ENSMUSG00000025421	-0.598603	0.0129679	0.127075
ENSMUSG00000025422	0.797367	0.0346732	0.242563
ENSMUSG00000025453	-0.692565	0.0165342	0.151243
ENSMUSG00000025464	0.548135	0.0339957	0.239565
ENSMUSG00000025466	1.13092	0.00152798	0.025322
ENSMUSG00000025469	6.67944	3.1411e-62	6.04691e-59
ENSMUSG00000025473	2.3443	1.2528e-11	1.16869e-09
ENSMUSG00000025477	-0.487647	0.0180747	0.159745
ENSMUSG00000025479	-0.818627	0.047009	0.288791
ENSMUSG00000025488	-1.10829	0.0261142	0.202691
ENSMUSG00000025498	1.29871	8.46323e-05	0.00220711
ENSMUSG00000025507	1.1689	0.000917867	0.0169457
ENSMUSG00000025511	0.982684	6.06665e-05	0.00165296
ENSMUSG00000025521	0.576632	0.0286892	0.21551
ENSMUSG00000025534	1.0333	4.32946e-05	0.0012406
ENSMUSG00000025558	-0.658881	0.0123268	0.122577
ENSMUSG00000025574	2.56477	3.66712e-19	7.76549e-17
ENSMUSG00000025597	-0.584078	0.0464176	0.2864
ENSMUSG00000025608	-0.534949	0.0316389	0.228197
ENSMUSG00000025610	1.07837	0.000171559	0.00409114
ENSMUSG00000025648	0.786538	0.00149984	0.0249691
ENSMUSG00000025701	0.61188	0.0488447	0.295964
ENSMUSG00000025702	-0.439878	0.0389689	0.260153
ENSMUSG00000025746	2.926	3.40946e-11	2.92471e-09
ENSMUSG00000025747	1.34253	4.73082e-08	2.39944e-06
ENSMUSG00000025758	1.14855	3.80242e-05	0.00111062
ENSMUSG00000025766	-1.13431	0.00328323	0.0465678
ENSMUSG00000025776	-0.62493	0.0242442	0.192861
ENSMUSG00000025779	0.715259	0.0312146	0.226293
ENSMUSG00000025786	-0.549335	0.00615223	0.0748718
ENSMUSG00000025789	-0.869196	0.01039	0.108286
ENSMUSG00000025790	-0.448621	0.0470644	0.289047
ENSMUSG00000025795	-0.427992	0.0442874	0.279116
ENSMUSG00000025804	2.23854	1.00514e-13	1.25945e-11
ENSMUSG00000025808	0.924585	0.0122695	0.122326
ENSMUSG00000025815	-0.746069	0.0164022	0.150361
ENSMUSG00000025854	0.873575	0.000194007	0.00451958
ENSMUSG00000025855	-0.591199	0.016358	0.150346
ENSMUSG00000025877	1.49732	2.20906e-11	1.94913e-09
ENSMUSG00000025885	-0.630824	0.0152602	0.142734
ENSMUSG00000025888	0.730541	0.00809618	0.0910607
ENSMUSG00000025903	1.7219	9.99021e-10	6.8686e-08
ENSMUSG00000025912	0.688963	0.0421507	0.27155
ENSMUSG00000025915	0.771872	0.00205291	0.032588
ENSMUSG00000025929	1.42318	0.00390811	NA
ENSMUSG00000025936	-0.785688	0.00165963	0.027123
ENSMUSG00000025938	-0.723345	0.0354868	0.245819
ENSMUSG00000025978	-0.875075	1.70677e-05	0.000549279
ENSMUSG00000026009	1.73559	4.35334e-13	4.85192e-11
ENSMUSG00000026011	2.30017	8.899e-11	7.16522e-09
ENSMUSG00000026012	0.690345	0.0201082	0.170735
ENSMUSG00000026014	-1.17179	0.00396507	0.0540311
ENSMUSG00000026031	-0.696646	0.0427711	0.27388
ENSMUSG00000026039	2.16662	3.85302e-11	3.27083e-09
ENSMUSG00000026042	0.763696	0.000741275	0.0141035
ENSMUSG00000026043	1.14363	3.54064e-07	1.58513e-05
ENSMUSG00000026062	-0.756618	0.0325105	0.232582
ENSMUSG00000026069	1.51222	3.12041e-10	2.30066e-08
ENSMUSG00000026070	-0.574988	0.0163983	0.150361
ENSMUSG00000026073	1.36174	7.93097e-05	0.00208629
ENSMUSG00000026077	-0.974678	0.00111637	0.0197661
ENSMUSG00000026080	0.777541	0.0451573	0.281333
ENSMUSG00000026095	0.934954	0.0077314	0.0882112
ENSMUSG00000026107	0.823627	0.0203236	0.172081
ENSMUSG00000026109	-0.74625	0.00376659	0.0519617
ENSMUSG00000026117	0.636703	0.0243194	0.193241
ENSMUSG00000026126	0.619204	0.0142281	0.135963
ENSMUSG00000026163	-1.67286	1.41366e-05	0.000463401
ENSMUSG00000026177	1.18739	4.03594e-05	0.00116755
ENSMUSG00000026185	-0.584696	0.0200608	0.170537
ENSMUSG00000026193	0.966017	0.00342038	0.0479034
ENSMUSG00000026196	1.41888	2.91034e-05	0.000868019
ENSMUSG00000026235	-0.634906	0.00543195	0.0683464
ENSMUSG00000026271	1.58476	3.22817e-09	2.03451e-07
ENSMUSG00000026274	1.60897	4.96066e-07	2.16591e-05
ENSMUSG00000026285	2.9783	1.16919e-15	1.79411e-13
ENSMUSG00000026301	-0.794876	0.00321572	0.0459133
ENSMUSG00000026303	0.543103	0.0425454	0.273095
ENSMUSG00000026311	-0.678815	0.0278326	0.211628
ENSMUSG00000026321	0.901826	0.000513283	0.0104312
ENSMUSG00000026335	-0.807365	0.000186349	0.00435555
ENSMUSG00000026344	0.962491	0.0175812	0.157221
ENSMUSG00000026355	1.67713	1.25158e-09	8.52202e-08
ENSMUSG00000026358	2.81871	1.76902e-15	2.6568e-13
ENSMUSG00000026380	-0.546008	0.0420131	0.270995
ENSMUSG00000026384	-0.465558	0.0414796	0.269109
ENSMUSG00000026389	0.537326	0.0338076	0.239084
ENSMUSG00000026395	0.783968	0.00195947	0.031316
ENSMUSG00000026405	1.4176	0.00620692	0.0752794
ENSMUSG00000026414	-1.00542	0.023129	0.186867
ENSMUSG00000026415	1.11508	0.0144193	0.137233
ENSMUSG00000026417	2.39747	8.91655e-23	2.77672e-20
ENSMUSG00000026429	1.62363	5.96953e-06	0.000212098
ENSMUSG00000026442	1.90791	0.000217789	0.00498584
ENSMUSG00000026458	1.04702	0.000217734	0.00498584
ENSMUSG00000026475	1.6194	0.000114084	0.0028885
ENSMUSG00000026480	1.37159	2.1709e-07	1.01654e-05
ENSMUSG00000026494	-0.682959	0.0255818	0.199529
ENSMUSG00000026495	-0.562253	0.0156327	0.14532
ENSMUSG00000026520	0.504228	0.0390798	0.260512
ENSMUSG00000026525	0.731031	0.0310861	0.226135
ENSMUSG00000026532	-0.916671	0.00251521	0.0380127
ENSMUSG00000026535	1.79591	2.51605e-09	1.62936e-07
ENSMUSG00000026536	0.853909	0.0428413	0.274104
ENSMUSG00000026548	1.46889	2.44362e-05	0.000747776
ENSMUSG00000026571	-0.495972	0.0185107	0.161976
ENSMUSG00000026579	1.33814	2.24109e-05	0.00069695
ENSMUSG00000026580	2.23787	9.06066e-11	7.18609e-09
ENSMUSG00000026582	2.33987	4.73633e-08	2.39944e-06
ENSMUSG00000026596	0.810004	0.0334947	0.237537
ENSMUSG00000026604	-0.756861	0.043672	0.276905
ENSMUSG00000026605	2.49052	6.76113e-11	5.52794e-09
ENSMUSG00000026622	0.978161	3.69296e-05	0.00108614
ENSMUSG00000026628	1.33146	3.44057e-08	1.8034e-06
ENSMUSG00000026630	2.54042	5.6677e-13	6.15483e-11
ENSMUSG00000026638	-0.508158	0.022085	0.1819
ENSMUSG00000026650	0.771421	0.0269903	0.207307
ENSMUSG00000026656	3.68672	6.39906e-50	8.46916e-47
ENSMUSG00000026669	2.342	9.52921e-11	7.5295e-09
ENSMUSG00000026683	2.90755	2.61304e-20	6.50986e-18
ENSMUSG00000026691	-2.09485	7.97174e-12	7.60403e-10
ENSMUSG00000026700	1.93438	0.00017668	0.00417961
ENSMUSG00000026701	-0.592458	0.0385351	0.258424
ENSMUSG00000026708	0.736425	0.015422	0.143677
ENSMUSG00000026712	1.83949	2.20796e-10	1.67583e-08
ENSMUSG00000026725	-0.475963	0.0390859	0.260512
ENSMUSG00000026726	-0.999806	0.00879497	0.0965486
ENSMUSG00000026728	0.579551	0.0181103	0.159893
ENSMUSG00000026749	0.616829	0.00907041	0.0985505
ENSMUSG00000026768	-0.743089	0.00136972	0.0230934
ENSMUSG00000026770	1.85672	7.9562e-12	7.60403e-10
ENSMUSG00000026779	2.0389	3.66425e-10	2.64826e-08
ENSMUSG00000026784	0.754184	0.00752559	0.0864702
ENSMUSG00000026786	0.787702	0.00164995	0.027001
ENSMUSG00000026814	-0.510401	0.0443887	0.279505
ENSMUSG00000026815	1.15249	0.0046553	0.0610407
ENSMUSG00000026822	2.63392	1.33986e-27	6.16799e-25
ENSMUSG00000026826	-0.500362	0.0404365	0.265484
ENSMUSG00000026833	0.853845	0.000112794	0.00286394
ENSMUSG00000026836	-0.647817	0.002516	0.0380127
ENSMUSG00000026840	-0.696804	0.0309757	0.225564
ENSMUSG00000026856	0.522874	0.0392129	0.260521
ENSMUSG00000026864	0.574947	0.0185217	0.161997
ENSMUSG00000026866	1.65426	4.11258e-09	2.54643e-07
ENSMUSG00000026873	1.81371	2.13328e-09	1.39859e-07
ENSMUSG00000026888	-0.437631	0.0438736	0.277748
ENSMUSG00000026928	0.777372	0.00260651	0.0389248
ENSMUSG00000026938	2.34048	5.23132e-09	3.17417e-07
ENSMUSG00000026941	-2.88532	8.04554e-16	1.26202e-13
ENSMUSG00000026950	0.835274	0.041935	0.270763
ENSMUSG00000026955	2.39753	2.11723e-11	1.87592e-09
ENSMUSG00000026958	0.921822	0.0011769	0.0205627
ENSMUSG00000026980	0.552631	0.0154088	0.143677
ENSMUSG00000026981	0.890979	0.000505405	0.0103206
ENSMUSG00000026991	-0.706307	0.000517195	0.0105006
ENSMUSG00000027016	0.870533	0.0023647	0.0363389
ENSMUSG00000027018	0.805587	0.00299323	0.0433251
ENSMUSG00000027068	1.8226	1.51764e-08	8.47954e-07
ENSMUSG00000027072	0.906684	0.0425708	NA
ENSMUSG00000027073	3.8238	5.56763e-21	1.49241e-18
ENSMUSG00000027076	0.824584	0.0107441	0.111038
ENSMUSG00000027107	0.852787	0.0487973	0.295829
ENSMUSG00000027115	0.959587	0.00539817	0.0681099
ENSMUSG00000027160	0.638066	0.012681	0.125132
ENSMUSG00000027163	0.496283	0.0384914	0.25835
ENSMUSG00000027187	-0.645077	0.00175853	0.0285353
ENSMUSG00000027188	-0.501633	0.0294785	0.218188
ENSMUSG00000027189	-0.601477	0.0362399	0.249094
ENSMUSG00000027199	2.86755	2.73706e-22	8.05985e-20
ENSMUSG00000027203	0.796907	0.00386341	0.0529868
ENSMUSG00000027208	-0.509603	0.0471101	0.28916
ENSMUSG00000027217	-0.699656	0.00995842	0.105132
ENSMUSG00000027219	1.0378	0.00109521	0.0195125
ENSMUSG00000027220	1.622	0.00158183	0.0260879
ENSMUSG00000027221	-0.60358	0.0181141	0.159893
ENSMUSG00000027224	1.06751	0.032419	0.232038
ENSMUSG00000027239	0.729704	0.0134119	0.130168
ENSMUSG00000027248	0.579459	0.0391398	0.260521
ENSMUSG00000027259	-0.557827	0.0416597	0.269815
ENSMUSG00000027276	-0.504866	0.029365	0.218111
ENSMUSG00000027281	1.08214	0.00119151	0.0207495
ENSMUSG00000027293	-0.604811	0.00362865	0.050321
ENSMUSG00000027306	2.53607	4.96616e-20	1.13114e-17
ENSMUSG00000027309	-0.539449	0.0328139	0.234057
ENSMUSG00000027314	-0.518979	0.0136483	0.13161
ENSMUSG00000027317	1.11158	0.00424224	0.0568913
ENSMUSG00000027318	-0.566244	0.0389158	0.25988
ENSMUSG00000027322	1.33683	1.28448e-05	0.000426336
ENSMUSG00000027323	2.50426	1.12949e-13	1.39872e-11
ENSMUSG00000027326	3.23351	1.53373e-13	1.86657e-11
ENSMUSG00000027330	0.563604	0.0103518	0.108091
ENSMUSG00000027331	1.97176	8.00385e-09	4.68203e-07
ENSMUSG00000027342	0.908845	0.000888374	0.016473
ENSMUSG00000027347	0.871867	0.00359655	0.0499413
ENSMUSG00000027356	-1.02202	0.00289773	0.0422897
ENSMUSG00000027359	0.801357	0.0462742	0.285686
ENSMUSG00000027360	0.569919	0.00839422	0.0934083
ENSMUSG00000027368	0.891085	0.00724947	0.0841638
ENSMUSG00000027379	2.06289	1.79511e-13	2.15985e-11
ENSMUSG00000027380	-0.948575	0.00275585	0.0406675
ENSMUSG00000027381	-0.74936	0.00274701	0.0405802
ENSMUSG00000027394	-0.490402	0.0376102	0.255161
ENSMUSG00000027398	0.617605	0.0275936	0.210666
ENSMUSG00000027408	1.54114	1.07192e-12	1.12371e-10
ENSMUSG00000027423	0.929546	0.00160702	0.0264416
ENSMUSG00000027435	-0.614689	0.031078	0.226135
ENSMUSG00000027446	-0.516047	0.01866	0.162779
ENSMUSG00000027454	1.60713	1.59932e-07	7.57657e-06
ENSMUSG00000027460	-0.864128	0.0129132	0.126657
ENSMUSG00000027469	2.5246	2.78127e-16	4.49589e-14
ENSMUSG00000027485	5.54516	5.08318e-45	5.66534e-42
ENSMUSG00000027490	0.673448	0.00413912	0.0559707
ENSMUSG00000027495	-0.644334	0.00226688	0.035219
ENSMUSG00000027496	2.1773	1.55412e-18	3.10472e-16
ENSMUSG00000027506	0.707579	0.002519	0.0380202
ENSMUSG00000027510	0.984359	0.00109657	0.0195125
ENSMUSG00000027514	1.99235	1.29134e-11	1.19936e-09
ENSMUSG00000027520	-1.18639	0.00854229	0.0945591
ENSMUSG00000027524	-0.57425	0.00440018	0.0584012
ENSMUSG00000027533	0.876674	0.0138447	0.133101
ENSMUSG00000027536	-0.555635	0.023416	0.188396
ENSMUSG00000027555	1.21109	3.08337e-07	1.39218e-05
ENSMUSG00000027575	0.727908	0.00315649	0.0451329
ENSMUSG00000027589	-0.530636	0.0265312	0.20512
ENSMUSG00000027635	0.75398	0.00166515	0.0271867
ENSMUSG00000027641	0.609592	0.0148071	0.13942
ENSMUSG00000027654	1.8064	2.19889e-06	8.52814e-05
ENSMUSG00000027670	3.67257	1.68519e-22	5.17182e-20
ENSMUSG00000027674	-1.05161	0.0165471	0.151296
ENSMUSG00000027684	-0.43711	0.0396125	0.262225
ENSMUSG00000027692	-0.489065	0.0395875	0.262225
ENSMUSG00000027699	2.14813	2.84683e-17	5.25884e-15
ENSMUSG00000027715	2.65292	3.06613e-18	5.95672e-16
ENSMUSG00000027716	-0.687825	0.0103909	0.108286
ENSMUSG00000027718	1.93337	0.000189666	0.00442819
ENSMUSG00000027720	1.06874	0.0216449	NA
ENSMUSG00000027737	1.79941	1.28184e-08	7.25783e-07
ENSMUSG00000027784	-0.635208	0.0218682	0.18075
ENSMUSG00000027793	2.54861	1.26886e-10	9.91487e-09
ENSMUSG00000027796	-0.964968	0.000112968	0.00286493
ENSMUSG00000027797	1.39817	2.24983e-05	0.00069857
ENSMUSG00000027811	0.992022	0.00489969	0.0631502
ENSMUSG00000027820	-0.626411	0.0213268	0.177731
ENSMUSG00000027832	1.66202	8.0797e-07	3.43566e-05
ENSMUSG00000027840	-0.868064	0.00643057	0.0771139
ENSMUSG00000027843	0.896107	0.00028588	0.00632504
ENSMUSG00000027861	-1.55405	0.00131706	0.0223836
ENSMUSG00000027863	0.882672	0.000906452	0.0167642
ENSMUSG00000027875	-1.2239	1.2284e-08	6.9739e-07
ENSMUSG00000027901	0.468829	0.0403908	0.265379
ENSMUSG00000027938	0.716487	0.0187544	0.163181
ENSMUSG00000027962	0.541565	0.031394	0.226972
ENSMUSG00000027993	-0.470246	0.0345748	0.242147
ENSMUSG00000027994	0.979477	2.79721e-05	0.000839006
ENSMUSG00000027996	1.01434	0.00342841	0.0479842
ENSMUSG00000028007	0.662746	0.0136033	0.131387
ENSMUSG00000028011	1.4795	2.80499e-06	0.000105691
ENSMUSG00000028019	1.77856	4.69594e-11	3.94608e-09
ENSMUSG00000028033	-0.56893	0.0300531	0.220848
ENSMUSG00000028036	-0.815148	0.000358833	0.00766765
ENSMUSG00000028037	0.862249	0.00596854	0.0730154
ENSMUSG00000028044	1.80205	2.37776e-08	1.28121e-06
ENSMUSG00000028064	0.702863	0.00405331	0.0549506
ENSMUSG00000028066	1.32774	1.94799e-06	7.63901e-05
ENSMUSG00000028068	2.80836	4.49802e-12	4.40972e-10
ENSMUSG00000028071	1.16539	0.000933766	0.0171943
ENSMUSG00000028072	1.78088	4.29008e-06	0.000156903
ENSMUSG00000028086	-0.605367	0.0402957	0.264918
ENSMUSG00000028088	-0.765546	0.00106043	0.018982
ENSMUSG00000028096	-0.645901	0.00810184	0.091064
ENSMUSG00000028111	2.94904	4.28748e-19	8.98928e-17
ENSMUSG00000028128	0.731313	0.00135451	0.0229099
ENSMUSG00000028159	0.531486	0.0213605	0.177872
ENSMUSG00000028175	2.5328	3.04603e-13	3.5441e-11
ENSMUSG00000028197	1.74291	0.000259954	0.00583134
ENSMUSG00000028207	-0.567286	0.044924	0.280818
ENSMUSG00000028212	1.30416	5.49134e-06	0.000197763
ENSMUSG00000028238	1.37673	1.6931e-06	6.71406e-05
ENSMUSG00000028251	0.533024	0.0241509	0.192445
ENSMUSG00000028262	1.43118	0.00373106	NA
ENSMUSG00000028268	0.519692	0.0220933	0.1819
ENSMUSG00000028312	1.14397	2.80279e-05	0.000839489
ENSMUSG00000028327	1.83493	2.3001e-06	8.87193e-05
ENSMUSG00000028328	-0.577562	0.0110609	0.113537
ENSMUSG00000028333	0.571654	0.0352838	0.245054
ENSMUSG00000028334	0.807905	0.000202467	0.00468061
ENSMUSG00000028337	1.15922	2.45804e-05	0.00075002
ENSMUSG00000028339	0.820145	0.00644093	0.0771891
ENSMUSG00000028341	0.725933	0.0149496	0.140511
ENSMUSG00000028359	-1.01358	0.0408017	0.26659
ENSMUSG00000028362	1.24232	7.42962e-05	0.00197402
ENSMUSG00000028373	-0.564822	0.0299967	0.220712
ENSMUSG00000028378	0.595693	0.026758	0.206346
ENSMUSG00000028402	-0.502081	0.0376399	0.255161
ENSMUSG00000028434	-0.762936	0.000745936	0.0141668
ENSMUSG00000028435	1.79865	1.47197e-05	0.000479545
ENSMUSG00000028444	-1.08925	0.000114726	0.0028991
ENSMUSG00000028459	1.05462	0.000650043	0.0126111
ENSMUSG00000028464	0.910276	0.00125408	0.0216258
ENSMUSG00000028468	0.766152	0.0357739	0.247242
ENSMUSG00000028469	-0.673967	0.00251494	0.0380127
ENSMUSG00000028476	-0.731492	0.000266727	0.00596433
ENSMUSG00000028480	0.798214	0.000627969	0.0122787
ENSMUSG00000028517	-0.406972	0.0397957	0.262887
ENSMUSG00000028532	-0.489902	0.0413271	0.268826
ENSMUSG00000028544	0.913939	0.0367162	0.250807
ENSMUSG00000028581	0.635916	0.044557	0.279816
ENSMUSG00000028587	1.92614	9.73458e-07	4.03146e-05
ENSMUSG00000028599	0.784189	0.000511108	0.010407
ENSMUSG00000028602	2.01411	5.582e-06	0.000200346
ENSMUSG00000028610	2.69872	2.85396e-08	1.53001e-06
ENSMUSG00000028613	1.70061	2.22632e-06	8.603e-05
ENSMUSG00000028614	0.51314	0.0488701	0.295964
ENSMUSG00000028633	0.486241	0.0174667	0.156395
ENSMUSG00000028634	0.628049	0.0494851	0.298291
ENSMUSG00000028645	0.471201	0.0290255	0.216576
ENSMUSG00000028649	-0.706284	0.021636	0.179583
ENSMUSG00000028654	0.652973	0.0052055	0.0660862
ENSMUSG00000028655	1.00468	0.0006104	0.0120352
ENSMUSG00000028671	1.35079	1.0582e-07	5.13957e-06
ENSMUSG00000028678	2.93169	3.50235e-25	1.21583e-22
ENSMUSG00000028681	1.00259	0.00253374	0.0381072
ENSMUSG00000028693	0.682796	0.00904783	0.0983556
ENSMUSG00000028698	-0.568748	0.0369219	0.251968
ENSMUSG00000028699	0.496389	0.0464304	0.2864
ENSMUSG00000028713	-0.755027	0.00507116	0.0646703
ENSMUSG00000028718	2.68009	2.78887e-14	3.76161e-12
ENSMUSG00000028744	0.89078	0.000128893	0.0031886
ENSMUSG00000028751	2.02974	7.17881e-05	0.00191459
ENSMUSG00000028773	-1.33421	0.00113632	0.019936
ENSMUSG00000028780	-0.751616	0.00756427	0.086772
ENSMUSG00000028786	1.06508	0.000169364	0.0040479
ENSMUSG00000028792	1.11147	3.8631e-08	1.99039e-06
ENSMUSG00000028793	0.553209	0.0254762	0.199055
ENSMUSG00000028838	-0.891244	0.0183678	0.161176
ENSMUSG00000028843	1.00379	0.000180751	0.00425173
ENSMUSG00000028860	0.636595	0.018949	0.16425
ENSMUSG00000028865	0.830569	0.0426356	0.273322
ENSMUSG00000028871	-0.783864	0.0108702	0.112122
ENSMUSG00000028873	2.94125	1.81462e-30	9.85291e-28
ENSMUSG00000028874	1.21765	4.72766e-06	0.000172312
ENSMUSG00000028884	0.519905	0.0275967	0.210666
ENSMUSG00000028885	0.897723	0.00158106	0.0260879
ENSMUSG00000028894	-0.518025	0.0222309	0.182536
ENSMUSG00000028896	1.02333	4.45797e-05	0.00126884
ENSMUSG00000028923	0.485788	0.0304611	0.222967
ENSMUSG00000028926	-0.637932	0.0318529	0.229268
ENSMUSG00000028931	1.30406	3.71405e-06	0.000138181
ENSMUSG00000028937	0.699507	0.00096093	0.0176179
ENSMUSG00000028961	0.515938	0.0261515	0.202851
ENSMUSG00000028965	2.43996	3.86149e-11	3.27083e-09
ENSMUSG00000028967	-0.994684	3.05216e-06	0.000114597
ENSMUSG00000028973	0.554383	0.0234064	0.18839
ENSMUSG00000028989	-0.683049	0.0404444	0.265484
ENSMUSG00000029053	-0.596467	0.0121015	0.121278
ENSMUSG00000029075	1.78011	1.9023e-05	0.000604852
ENSMUSG00000029090	-0.582949	0.0205022	0.173108
ENSMUSG00000029102	0.901846	0.00445971	0.0590612
ENSMUSG00000029120	-1.10399	0.00141245	0.023663
ENSMUSG00000029121	1.06714	0.00808034	0.0909672
ENSMUSG00000029122	-0.516615	0.042845	0.274104
ENSMUSG00000029123	1.40263	0.00677417	0.0803041
ENSMUSG00000029126	-0.444648	0.044117	0.278539
ENSMUSG00000029136	0.59641	0.0429059	0.274328
ENSMUSG00000029161	1.45984	6.09574e-05	0.00165704
ENSMUSG00000029163	0.736553	0.00587588	0.0723854
ENSMUSG00000029177	1.78279	3.12303e-09	1.97413e-07
ENSMUSG00000029189	0.997811	2.28994e-05	0.000708944
ENSMUSG00000029193	-0.511929	0.0126595	0.124978
ENSMUSG00000029196	-0.644182	0.0130709	0.127819
ENSMUSG00000029204	0.830504	0.00384425	0.0528266
ENSMUSG00000029217	0.870818	0.00126352	0.0217354
ENSMUSG00000029231	-0.740456	0.000305719	0.00666039
ENSMUSG00000029245	0.992488	0.00112879	0.0199029
ENSMUSG00000029254	1.06015	0.000161077	0.0038805
ENSMUSG00000029273	-0.715769	0.0134334	0.130309
ENSMUSG00000029275	1.68037	1.4907e-05	0.0004849
ENSMUSG00000029287	-0.825426	0.000148901	0.00364104
ENSMUSG00000029298	0.988922	0.0134518	0.130369
ENSMUSG00000029304	2.12582	1.78519e-12	1.81746e-10
ENSMUSG00000029307	3.58368	1.43049e-12	1.48491e-10
ENSMUSG00000029314	-0.551602	0.0168724	0.153146
ENSMUSG00000029321	-0.83921	0.000933369	0.0171943
ENSMUSG00000029322	0.838302	0.0172973	0.155404
ENSMUSG00000029334	-0.857143	0.000111723	0.00285041
ENSMUSG00000029335	-0.698424	0.00302804	0.0437393
ENSMUSG00000029363	0.742975	0.0415739	0.269556
ENSMUSG00000029366	1.05865	2.32584e-05	0.00071697
ENSMUSG00000029368	-1.08351	0.0305728	0.223553
ENSMUSG00000029371	2.96367	5.05533e-12	4.93325e-10
ENSMUSG00000029372	-0.869639	0.000580829	0.0115707
ENSMUSG00000029373	0.930494	0.0036026	0.0499926
ENSMUSG00000029379	5.24191	1.31123e-52	1.8511e-49
ENSMUSG00000029380	1.70602	3.67265e-07	1.6333e-05
ENSMUSG00000029401	0.832816	0.0009842	0.0179204
ENSMUSG00000029403	-0.469746	0.0377823	0.255616
ENSMUSG00000029413	0.73145	0.00136444	0.0230469
ENSMUSG00000029414	2.84513	1.26026e-12	1.31465e-10
ENSMUSG00000029417	4.05242	1.3926e-26	5.46106e-24
ENSMUSG00000029430	0.606034	0.0270333	0.207476
ENSMUSG00000029436	0.732039	0.00881867	0.0966584
ENSMUSG00000029442	-0.544406	0.0219664	0.181279
ENSMUSG00000029449	0.574586	0.0267381	0.206268
ENSMUSG00000029482	0.657248	0.00328163	0.0465678
ENSMUSG00000029490	0.747439	0.00505355	0.064583
ENSMUSG00000029516	1.0091	0.00591891	0.0725369
ENSMUSG00000029521	0.925431	0.00135256	0.0228952
ENSMUSG00000029530	1.46176	8.38585e-06	0.000288938
ENSMUSG00000029553	2.46043	2.13267e-16	3.50088e-14
ENSMUSG00000029559	0.778204	0.00695404	0.0818105
ENSMUSG00000029560	0.912779	0.000528199	0.0106424
ENSMUSG00000029563	-0.675078	0.00914627	0.0990191
ENSMUSG00000029578	-0.680297	0.0275904	0.210666
ENSMUSG00000029580	0.589492	0.0213401	0.177772
ENSMUSG00000029581	0.871667	0.000972182	0.0177527
ENSMUSG00000029587	0.870097	0.00881326	0.0966584
ENSMUSG00000029591	1.89068	4.69241e-11	3.94608e-09
ENSMUSG00000029602	1.03393	0.0377064	0.255429
ENSMUSG00000029610	0.604338	0.0218269	0.180549
ENSMUSG00000029616	1.02895	0.000966419	0.0177032
ENSMUSG00000029622	1.04249	9.74295e-06	0.000332233
ENSMUSG00000029625	0.492803	0.024109	0.192218
ENSMUSG00000029648	-0.668321	0.0116189	0.117667
ENSMUSG00000029660	0.831591	0.00575909	0.0713616
ENSMUSG00000029664	1.44342	6.69386e-06	0.000236249
ENSMUSG00000029675	-0.712737	0.000995609	0.0180505
ENSMUSG00000029683	-1.08359	0.0191075	0.164893
ENSMUSG00000029685	-1.1313	0.0151	0.141611
ENSMUSG00000029687	0.855024	0.000157255	0.00379707
ENSMUSG00000029695	0.624548	0.0315479	0.227773
ENSMUSG00000029715	0.47101	0.042665	0.273366
ENSMUSG00000029720	0.534098	0.0200064	0.170276
ENSMUSG00000029730	0.855375	0.000944119	0.0173698
ENSMUSG00000029765	-0.637362	0.0432701	0.275824
ENSMUSG00000029771	0.918254	9.12321e-05	0.00236466
ENSMUSG00000029811	2.07257	3.59892e-11	3.07301e-09
ENSMUSG00000029816	1.02117	2.47238e-05	0.000753311
ENSMUSG00000029821	0.65989	0.0382204	0.257522
ENSMUSG00000029828	-1.24949	0.00111328	0.0197445
ENSMUSG00000029829	1.86881	7.47466e-06	0.000260763
ENSMUSG00000029832	-0.615685	0.0110455	0.113488
ENSMUSG00000029869	-0.750116	0.0146664	0.138874
ENSMUSG00000029910	1.28146	5.30463e-07	2.30659e-05
ENSMUSG00000029915	2.01381	1.92443e-09	1.27349e-07
ENSMUSG00000029919	1.43842	8.09064e-05	0.00212039
ENSMUSG00000029925	2.15635	5.83843e-16	9.36626e-14
ENSMUSG00000029999	-0.71831	0.00354404	0.0493741
ENSMUSG00000030020	-0.725011	0.0103622	0.108135
ENSMUSG00000030043	1.3511	0.00436924	0.058154
ENSMUSG00000030074	0.926391	0.00101617	0.0183043
ENSMUSG00000030077	3.85695	4.39013e-20	1.03295e-17
ENSMUSG00000030087	-0.798361	0.00688617	0.0811472
ENSMUSG00000030092	-0.966459	0.0328792	NA
ENSMUSG00000030093	-0.490729	0.0360256	0.248252
ENSMUSG00000030094	-0.619888	0.00201669	0.0321335
ENSMUSG00000030103	1.1748	8.81437e-07	3.6961e-05
ENSMUSG00000030104	0.451647	0.0350932	0.244051
ENSMUSG00000030107	0.531006	0.0246385	0.19541
ENSMUSG00000030109	1.87987	0.0002838	0.00628636
ENSMUSG00000030114	1.08832	0.00386248	0.0529868
ENSMUSG00000030117	1.60099	0.00191894	0.0307147
ENSMUSG00000030124	2.16405	4.71446e-13	5.22688e-11
ENSMUSG00000030125	0.612246	0.00995916	0.105132
ENSMUSG00000030126	1.05605	2.32602e-05	0.00071697
ENSMUSG00000030144	0.834839	0.00550944	0.0690342
ENSMUSG00000030147	0.984753	0.0222536	0.182652
ENSMUSG00000030148	2.11092	1.33564e-09	9.00749e-08
ENSMUSG00000030154	1.02634	0.00109539	0.0195125
ENSMUSG00000030161	-0.720842	0.0212378	0.177059
ENSMUSG00000030162	1.38767	2.58745e-07	1.18854e-05
ENSMUSG00000030187	0.796168	0.0397739	0.262887
ENSMUSG00000030201	-0.539737	0.0499495	0.299525
ENSMUSG00000030203	-0.702804	0.00155537	0.0257316
ENSMUSG00000030214	0.863242	0.000173714	0.00413786
ENSMUSG00000030218	1.14947	0.000722485	0.0138081
ENSMUSG00000030220	0.984537	0.000950672	0.0174721
ENSMUSG00000030222	-0.685635	0.00745372	0.085876
ENSMUSG00000030223	1.54815	9.72339e-10	6.75091e-08
ENSMUSG00000030225	0.711005	0.0012812	0.021915
ENSMUSG00000030237	-1.13071	0.0202114	NA
ENSMUSG00000030249	-0.627072	0.0417905	0.270381
ENSMUSG00000030263	1.1143	0.00011107	0.00283718
ENSMUSG00000030268	3.04072	4.80343e-13	5.27034e-11
ENSMUSG00000030275	-0.450456	0.0381214	0.257291
ENSMUSG00000030278	-0.556716	0.0366209	0.250399
ENSMUSG00000030283	0.748624	0.0151376	0.141838
ENSMUSG00000030322	0.618028	0.0491274	0.296811
ENSMUSG00000030336	0.81452	0.0364483	0.249864
ENSMUSG00000030361	1.42077	0.000150268	0.00366599
ENSMUSG00000030413	1.63181	5.60983e-08	2.80836e-06
ENSMUSG00000030427	-0.93581	0.0235177	0.188889
ENSMUSG00000030443	-0.701484	0.0222133	0.182463
ENSMUSG00000030468	1.11895	0.000738128	0.0140563
ENSMUSG00000030483	-0.660556	0.00492095	0.0633695
ENSMUSG00000030495	-0.622275	0.00703891	0.0824881
ENSMUSG00000030513	-0.66775	0.0241697	0.192448
ENSMUSG00000030516	-0.622933	0.0333	0.236536
ENSMUSG00000030525	0.965487	0.0260317	0.202218
ENSMUSG00000030545	-0.446856	0.037479	0.25454
ENSMUSG00000030551	-0.728383	0.00804884	0.0907573
ENSMUSG00000030553	1.51701	0.00338486	0.0475002
ENSMUSG00000030560	0.678201	0.00262005	0.0390995
ENSMUSG00000030562	-0.582039	0.0269266	0.207026
ENSMUSG00000030579	1.03025	0.00237958	0.0365146
ENSMUSG00000030592	0.831746	0.0186639	0.162779
ENSMUSG00000030616	-0.68025	0.00125869	0.0216876
ENSMUSG00000030621	-0.613808	0.0391838	0.260521
ENSMUSG00000030641	1.71648	1.21082e-05	0.000405702
ENSMUSG00000030649	0.803426	0.00419447	0.0565986
ENSMUSG00000030650	1.94938	0.00014335	0.00352563
ENSMUSG00000030651	1.48998	0.00242047	0.0369811
ENSMUSG00000030670	1.07359	0.0289275	0.21622
ENSMUSG00000030674	1.48058	0.000736125	0.0140308
ENSMUSG00000030677	2.49095	1.18313e-15	1.80245e-13
ENSMUSG00000030701	-0.558948	0.0230609	0.186581
ENSMUSG00000030707	0.985159	0.000349827	0.00749791
ENSMUSG00000030711	-0.741472	0.0122959	0.122531
ENSMUSG00000030742	0.829999	0.00455152	0.0600517
ENSMUSG00000030745	1.26137	4.77104e-05	0.00133817
ENSMUSG00000030757	-0.960603	0.049201	0.297171
ENSMUSG00000030761	0.71603	0.00652437	0.0779244
ENSMUSG00000030772	-0.564706	0.00584478	0.072136
ENSMUSG00000030789	2.09743	6.54618e-16	1.03449e-13
ENSMUSG00000030790	-0.913748	0.00127207	0.021794
ENSMUSG00000030793	1.35446	4.80392e-05	0.00134471
ENSMUSG00000030798	0.834632	0.00951019	0.10166
ENSMUSG00000030826	0.674108	0.00488732	0.063106
ENSMUSG00000030834	1.91779	1.19464e-06	4.91217e-05
ENSMUSG00000030844	0.964979	0.00386705	0.0530023
ENSMUSG00000030865	1.2259	9.26781e-05	0.00239921
ENSMUSG00000030866	3.87965	1.69872e-14	2.38226e-12
ENSMUSG00000030867	2.63153	3.61803e-17	6.54832e-15
ENSMUSG00000030873	-0.577169	0.0135343	0.130988
ENSMUSG00000030878	-0.54404	0.00955236	0.101956
ENSMUSG00000030905	-0.536328	0.0273501	0.209312
ENSMUSG00000030924	0.675441	0.0249011	0.196829
ENSMUSG00000030930	-0.616067	0.0178695	0.158793
ENSMUSG00000030967	-0.774688	0.00505701	0.0645882
ENSMUSG00000030972	-1.04304	0.0381271	0.257291
ENSMUSG00000030978	0.727828	0.0055488	0.0694453
ENSMUSG00000030979	0.613838	0.0249375	0.196966
ENSMUSG00000030980	-0.954706	0.00253978	0.0381435
ENSMUSG00000031004	2.74215	3.49386e-13	3.97774e-11
ENSMUSG00000031027	-0.656837	0.0236375	0.18953
ENSMUSG00000031093	0.542371	0.047922	0.292112
ENSMUSG00000031101	0.980386	4.65173e-05	0.00130991
ENSMUSG00000031142	1.37749	0.00732964	0.0848714
ENSMUSG00000031147	-0.658654	0.0232094	0.187231
ENSMUSG00000031155	0.822634	0.00241567	0.0369345
ENSMUSG00000031162	1.48519	0.00100539	0.0181656
ENSMUSG00000031165	0.855527	0.000951329	0.0174721
ENSMUSG00000031209	-0.583299	0.0382568	0.257567
ENSMUSG00000031210	-1.24738	0.00940906	NA
ENSMUSG00000031217	-0.638575	0.0267268	0.206256
ENSMUSG00000031246	-0.57413	0.0383564	0.257689
ENSMUSG00000031262	2.3746	3.1837e-11	2.76303e-09
ENSMUSG00000031264	1.09514	3.17849e-05	0.000941485
ENSMUSG00000031266	0.615051	0.0318504	0.229268
ENSMUSG00000031274	-0.679971	0.00150823	0.0250889
ENSMUSG00000031278	0.449801	0.0416649	0.269815
ENSMUSG00000031283	-0.97867	0.000118875	0.00297201
ENSMUSG00000031289	4.57297	2.25133e-21	6.19144e-19
ENSMUSG00000031304	0.471991	0.03745	0.254534
ENSMUSG00000031312	-1.3949	0.00103817	0.0186465
ENSMUSG00000031340	-0.731449	0.0374711	0.25454
ENSMUSG00000031343	-0.529838	0.048575	0.294988
ENSMUSG00000031362	1.11561	0.00720317	0.0839022
ENSMUSG00000031375	-0.615627	0.00330704	0.0467652
ENSMUSG00000031377	-0.685375	0.0300229	0.220751
ENSMUSG00000031380	-0.852162	0.000292184	0.00641834
ENSMUSG00000031381	0.736417	0.0109767	0.112891
ENSMUSG00000031389	0.899158	0.00489625	0.0631443
ENSMUSG00000031430	0.977644	0.00689462	0.0812016
ENSMUSG00000031431	-0.658268	0.0046256	0.0607641
ENSMUSG00000031438	1.21057	4.70569e-07	2.05884e-05
ENSMUSG00000031443	2.03213	1.01473e-13	1.26399e-11
ENSMUSG00000031444	2.89937	2.81716e-29	1.42039e-26
ENSMUSG00000031465	-0.630405	0.00475095	0.0619115
ENSMUSG00000031480	-0.682713	0.00291466	0.0424724
ENSMUSG00000031489	-0.695311	0.00783324	0.0891456
ENSMUSG00000031494	1.15456	0.000574733	0.0114708
ENSMUSG00000031495	3.33354	4.7247e-17	8.40758e-15
ENSMUSG00000031497	1.04465	8.39143e-06	0.000288938
ENSMUSG00000031506	1.54065	0.000154307	0.00375587
ENSMUSG00000031523	-0.594418	0.0283606	0.214105
ENSMUSG00000031527	0.508485	0.0357108	0.247047
ENSMUSG00000031543	-0.977652	0.0401127	0.264112
ENSMUSG00000031548	0.980657	0.000324144	0.00698988
ENSMUSG00000031562	1.68236	0.000591745	0.011744
ENSMUSG00000031574	-0.618738	0.0201818	0.171153
ENSMUSG00000031586	-0.427859	0.0413911	0.268947
ENSMUSG00000031594	2.76273	9.27612e-08	4.52606e-06
ENSMUSG00000031596	1.38059	5.68979e-05	0.00156477
ENSMUSG00000031608	1.08057	5.77452e-06	0.000206441
ENSMUSG00000031609	0.623311	0.00735022	0.0850537
ENSMUSG00000031613	-0.798394	0.00160836	0.0264431
ENSMUSG00000031618	-0.51072	0.0291527	0.217219
ENSMUSG00000031629	1.09491	0.00332806	0.0469833
ENSMUSG00000031639	-0.60744	0.00805456	0.0907735
ENSMUSG00000031654	1.08598	0.0192678	0.165658
ENSMUSG00000031662	1.21681	9.86082e-07	4.07042e-05
ENSMUSG00000031667	-0.582117	0.0134497	0.130369
ENSMUSG00000031698	-0.937986	0.00589051	0.0724376
ENSMUSG00000031725	-0.981956	0.000654583	0.0126704
ENSMUSG00000031753	-0.616899	0.00410205	0.0555048
ENSMUSG00000031755	-0.540622	0.0251347	0.197482
ENSMUSG00000031756	1.99421	1.72144e-08	9.54271e-07
ENSMUSG00000031762	1.8687	2.49879e-10	1.8898e-08
ENSMUSG00000031765	1.20734	8.45436e-05	0.00220711
ENSMUSG00000031775	-0.70471	0.00424481	0.0568913
ENSMUSG00000031779	3.17109	3.1489e-32	1.90518e-29
ENSMUSG00000031780	2.71712	2.10564e-16	3.48352e-14
ENSMUSG00000031789	-0.822704	0.0122324	0.1221
ENSMUSG00000031805	0.963029	0.00330068	0.0467214
ENSMUSG00000031807	0.87405	0.00305011	0.0439682
ENSMUSG00000031821	1.94602	9.89032e-10	6.82207e-08
ENSMUSG00000031827	1.65937	2.19543e-10	1.67232e-08
ENSMUSG00000031838	1.58057	9.01999e-11	7.18072e-09
ENSMUSG00000031841	-0.943384	0.00162032	0.0265983
ENSMUSG00000031848	0.829645	0.0024156	0.0369345
ENSMUSG00000031871	-0.702707	0.0123774	0.122765
ENSMUSG00000031877	-0.723484	0.00118279	0.0206147
ENSMUSG00000031897	0.635289	0.0152027	0.14226
ENSMUSG00000031903	0.728826	0.00304776	0.0439682
ENSMUSG00000031906	0.781782	0.00802645	0.0906497
ENSMUSG00000031910	1.13888	0.00862811	0.0951113
ENSMUSG00000031933	1.05519	0.00883795	0.0967696
ENSMUSG00000031963	-0.469701	0.0308133	0.224537
ENSMUSG00000031966	-1.38677	0.000227133	0.00517736
ENSMUSG00000031971	0.734429	0.0433281	0.276027
ENSMUSG00000031983	-0.541418	0.0114027	0.116033
ENSMUSG00000031987	-0.41413	0.0449572	0.280818
ENSMUSG00000032006	-0.63487	0.00627665	0.0757778
ENSMUSG00000032011	0.859465	0.000507655	0.0103566
ENSMUSG00000032013	1.82038	4.2232e-10	3.0213e-08
ENSMUSG00000032014	0.60429	0.0128234	0.126243
ENSMUSG00000032015	-0.972336	0.027612	0.210707
ENSMUSG00000032020	0.5968	0.0251382	0.197482
ENSMUSG00000032034	-1.59686	0.000565954	0.0113063
ENSMUSG00000032035	0.591026	0.0172252	0.154888
ENSMUSG00000032038	0.574895	0.0183965	0.161243
ENSMUSG00000032053	0.878918	0.0029967	0.0433458
ENSMUSG00000032064	-0.677616	0.00184597	0.0296588
ENSMUSG00000032085	0.648022	0.0321089	0.230603
ENSMUSG00000032091	0.694368	0.00686468	0.0810152
ENSMUSG00000032093	0.729745	0.0172053	0.154888
ENSMUSG00000032113	1.79596	1.99434e-05	0.000630533
ENSMUSG00000032118	-1.03993	0.00859053	0.0948818
ENSMUSG00000032122	1.14174	0.00139127	0.0233822
ENSMUSG00000032172	-0.747089	0.0233768	0.188224
ENSMUSG00000032186	-0.738087	0.0476952	0.291568
ENSMUSG00000032204	2.07425	8.95796e-15	1.28171e-12
ENSMUSG00000032218	2.78529	1.11416e-20	2.94919e-18
ENSMUSG00000032224	-0.718111	0.00583396	0.072077
ENSMUSG00000032226	1.48154	0.00420246	0.0566102
ENSMUSG00000032238	-0.868424	0.0185351	0.161997
ENSMUSG00000032254	1.82044	4.13196e-09	2.55097e-07
ENSMUSG00000032281	0.993665	0.0249723	0.196966
ENSMUSG00000032285	-0.560199	0.00963335	0.102459
ENSMUSG00000032289	-0.6246	0.0269313	0.207026
ENSMUSG00000032299	0.487548	0.0434831	0.276412
ENSMUSG00000032307	-0.950562	0.000314253	0.00683021
ENSMUSG00000032311	0.808445	0.0161152	0.148501
ENSMUSG00000032312	0.574723	0.00708746	0.0828278
ENSMUSG00000032322	1.05445	0.000536596	0.0107706
ENSMUSG00000032323	2.12943	1.49067e-10	1.15206e-08
ENSMUSG00000032327	1.45696	0.00178581	0.0289115
ENSMUSG00000032332	-0.870987	0.00352853	0.0491903
ENSMUSG00000032340	-0.63036	0.00453294	0.0599186
ENSMUSG00000032344	0.751364	0.0460042	0.284683
ENSMUSG00000032350	0.726589	0.00484215	0.0627139
ENSMUSG00000032352	-0.690505	0.00323305	0.046072
ENSMUSG00000032356	-0.888184	0.015991	0.147602
ENSMUSG00000032374	-0.514154	0.032235	0.231158
ENSMUSG00000032377	-0.650983	0.00184342	0.0296402
ENSMUSG00000032380	-0.540451	0.0397918	0.262887
ENSMUSG00000032381	0.753287	0.0146835	0.138874
ENSMUSG00000032400	1.54533	3.71945e-06	0.000138181
ENSMUSG00000032402	-0.494938	0.0270253	0.207476
ENSMUSG00000032418	0.556903	0.039929	0.263271
ENSMUSG00000032419	-1.06025	0.0125965	0.12453
ENSMUSG00000032425	-0.481586	0.0450764	0.281182
ENSMUSG00000032436	1.22769	6.58305e-06	0.000232726
ENSMUSG00000032449	-0.443356	0.0451457	0.281333
ENSMUSG00000032462	-0.527325	0.0217656	0.180113
ENSMUSG00000032496	4.54075	9.22798e-95	6.51373e-91
ENSMUSG00000032500	-0.766166	0.00774179	0.0882823
ENSMUSG00000032518	0.682234	0.00708494	0.0828278
ENSMUSG00000032531	-0.70217	0.00223238	0.03485
ENSMUSG00000032548	-0.550764	0.0365553	0.250215
ENSMUSG00000032549	-1.04928	2.65028e-05	0.00079606
ENSMUSG00000032575	0.840141	0.00270463	0.0401354
ENSMUSG00000032577	0.732292	0.00437336	0.0581722
ENSMUSG00000032579	0.597385	0.0376548	0.255161
ENSMUSG00000032586	1.28802	4.38885e-05	0.00125423
ENSMUSG00000032625	-0.798048	0.00740967	0.0856481
ENSMUSG00000032643	0.618532	0.00804412	0.0907573
ENSMUSG00000032648	-0.768872	0.00476011	0.0619642
ENSMUSG00000032649	-0.707892	0.00230487	0.0356783
ENSMUSG00000032661	0.785605	0.0498951	0.299484
ENSMUSG00000032688	0.899508	0.002999	0.0433494
ENSMUSG00000032690	1.02065	0.00649528	0.0776688
ENSMUSG00000032698	-0.851403	0.000292045	0.00641834
ENSMUSG00000032714	-0.528254	0.0381566	0.257408
ENSMUSG00000032725	2.63301	9.61011e-17	1.6545e-14
ENSMUSG00000032735	-0.791161	0.000450762	0.00933985
ENSMUSG00000032782	0.739609	0.00840077	0.0934321
ENSMUSG00000032783	2.78829	6.67885e-13	7.143e-11
ENSMUSG00000032815	1.124	0.00105563	0.0189281
ENSMUSG00000032826	1.09076	0.0029148	0.0424724
ENSMUSG00000032827	-0.902625	0.00207983	0.0329413
ENSMUSG00000032839	-0.540918	0.0133082	0.129451
ENSMUSG00000032860	1.09985	0.00247403	0.0376096
ENSMUSG00000032878	-0.707442	0.012805	0.126121
ENSMUSG00000032902	0.695632	0.0117851	0.119065
ENSMUSG00000032915	0.590158	0.0274821	0.210018
ENSMUSG00000032925	-1.02032	0.000543464	0.0108981
ENSMUSG00000033031	1.99617	1.34763e-11	1.24618e-09
ENSMUSG00000033044	-1.42533	0.00571234	0.0710303
ENSMUSG00000033060	-0.605922	0.0457697	0.283729
ENSMUSG00000033066	0.902708	0.00509338	0.0648572
ENSMUSG00000033149	-0.425701	0.0427842	0.273881
ENSMUSG00000033187	-1.077	0.0287852	0.215848
ENSMUSG00000033192	0.664056	0.00659284	0.0785208
ENSMUSG00000033207	-0.579417	0.0212174	0.17696
ENSMUSG00000033213	3.8623	9.14867e-20	1.99724e-17
ENSMUSG00000033220	1.07929	0.000355034	0.00759413
ENSMUSG00000033222	0.511031	0.035075	0.244035
ENSMUSG00000033227	1.15408	0.0154656	0.143829
ENSMUSG00000033278	-0.542605	0.0438197	0.277564
ENSMUSG00000033294	0.626309	0.00783744	0.0891456
ENSMUSG00000033307	0.670117	0.00598098	0.0731254
ENSMUSG00000033316	0.958943	0.0495878	0.298655
ENSMUSG00000033350	-0.782996	0.00248609	0.0377387
ENSMUSG00000033377	-0.616286	0.0123313	0.122577
ENSMUSG00000033386	1.22867	0.000179127	0.00422404
ENSMUSG00000033419	-1.24169	0.0164734	0.150882
ENSMUSG00000033427	1.12335	0.0158454	0.146589
ENSMUSG00000033467	0.639079	0.00761866	0.0873485
ENSMUSG00000033488	0.728287	0.00336573	0.0472916
ENSMUSG00000033538	1.15414	3.13575e-07	1.40982e-05
ENSMUSG00000033542	-0.645523	0.0101575	0.106378
ENSMUSG00000033576	1.18266	0.000298009	0.006526
ENSMUSG00000033577	-0.49112	0.0422847	0.272143
ENSMUSG00000033578	-0.675325	0.0322706	0.231184
ENSMUSG00000033579	-0.977218	0.0383333	0.257659
ENSMUSG00000033589	0.725292	0.00174466	0.0283319
ENSMUSG00000033644	2.17554	6.00489e-08	2.99199e-06
ENSMUSG00000033684	0.538276	0.0286632	0.215391
ENSMUSG00000033701	0.835223	5.482e-05	0.00150958
ENSMUSG00000033713	-0.519813	0.012309	0.122546
ENSMUSG00000033717	3.05248	4.22913e-23	1.33666e-20
ENSMUSG00000033737	1.06231	0.0371988	0.253287
ENSMUSG00000033752	1.00674	0.0144107	0.137213
ENSMUSG00000033762	1.21179	0.00247088	0.0375886
ENSMUSG00000033769	-0.575736	0.0345369	0.24201
ENSMUSG00000033777	1.17779	0.000206729	0.00476872
ENSMUSG00000033792	-0.967236	0.0221871	0.182408
ENSMUSG00000033826	0.655287	0.0474125	0.290291
ENSMUSG00000033845	0.587066	0.0436022	0.276775
ENSMUSG00000033847	1.53364	0.0021518	0.0339069
ENSMUSG00000033871	1.35359	0.000151118	0.00368248
ENSMUSG00000033880	0.773829	0.00624939	0.0755349
ENSMUSG00000033910	-0.426782	0.0348917	0.243369
ENSMUSG00000033952	2.8583	1.93171e-13	2.28525e-11
ENSMUSG00000033960	-0.678978	0.0118008	0.119167
ENSMUSG00000033970	0.856029	0.000881807	0.0163656
ENSMUSG00000034023	1.43864	7.00339e-06	0.000245536
ENSMUSG00000034037	-0.681596	0.0120757	0.121077
ENSMUSG00000034071	-0.725631	0.0279386	0.212053
ENSMUSG00000034101	-0.558384	0.0218571	0.180729
ENSMUSG00000034107	1.9067	0.000195745	0.00455504
ENSMUSG00000034116	0.94782	0.000293942	0.00645028
ENSMUSG00000034120	0.458363	0.0344893	0.241784
ENSMUSG00000034145	-0.98119	0.0439942	0.278179
ENSMUSG00000034161	-0.644051	0.011577	0.117299
ENSMUSG00000034206	1.23388	0.00223326	0.03485
ENSMUSG00000034235	-0.756219	0.00964744	0.102485
ENSMUSG00000034258	-0.659641	0.00214922	0.0339069
ENSMUSG00000034266	1.22489	2.18731e-06	8.49882e-05
ENSMUSG00000034290	-0.495966	0.0143675	0.137025
ENSMUSG00000034292	-0.453992	0.0312074	0.226293
ENSMUSG00000034311	1.673	4.72921e-09	2.90278e-07
ENSMUSG00000034329	1.22387	0.00101652	0.0183043
ENSMUSG00000034330	0.687872	0.0197494	0.168702
ENSMUSG00000034342	1.28044	0.000165014	0.00395956
ENSMUSG00000034349	0.624348	0.0279548	0.2121
ENSMUSG00000034416	1.14377	0.0210901	0.176384
ENSMUSG00000034452	-1.15336	0.0252563	0.197755
ENSMUSG00000034459	0.833644	0.00594269	0.0727834
ENSMUSG00000034460	-0.732214	0.0357426	0.247106
ENSMUSG00000034462	-0.777934	0.00123538	0.0213729
ENSMUSG00000034485	-0.649391	0.0311479	0.226184
ENSMUSG00000034487	-0.567953	0.0433143	0.276023
ENSMUSG00000034488	-0.651166	0.00249759	0.0378813
ENSMUSG00000034520	-0.512253	0.0330322	0.235123
ENSMUSG00000034557	-0.711541	0.0327396	0.233733
ENSMUSG00000034570	1.33564	0.000196293	0.00455778
ENSMUSG00000034574	-0.681983	0.0118182	0.119187
ENSMUSG00000034579	1.26077	0.0144756	0.13755
ENSMUSG00000034641	0.849698	0.00580437	0.0717533
ENSMUSG00000034652	1.21248	6.16715e-05	0.00167002
ENSMUSG00000034656	0.758287	0.0449624	0.280818
ENSMUSG00000034663	0.601817	0.0129111	0.126657
ENSMUSG00000034687	-0.740483	0.0160382	0.147856
ENSMUSG00000034708	0.747606	0.000512101	0.0104171
ENSMUSG00000034738	-0.520111	0.0216268	0.179583
ENSMUSG00000034744	0.595646	0.0425201	0.273016
ENSMUSG00000034761	-0.469799	0.0396203	0.262225
ENSMUSG00000034764	1.29077	0.0122447	0.122136
ENSMUSG00000034773	2.4391	2.95145e-08	1.57035e-06
ENSMUSG00000034786	0.495563	0.0499352	0.299525
ENSMUSG00000034792	1.60468	1.43404e-10	1.11644e-08
ENSMUSG00000034795	0.653666	0.0499809	0.299574
ENSMUSG00000034799	-0.604757	0.00866815	0.0954037
ENSMUSG00000034807	0.63955	0.0405607	0.265909
ENSMUSG00000034810	-0.607662	0.0123426	0.122592
ENSMUSG00000034848	-0.448839	0.0399333	0.263271
ENSMUSG00000034854	0.922461	6.85293e-05	0.00182998
ENSMUSG00000034855	3.13059	3.58325e-20	8.62259e-18
ENSMUSG00000034871	1.06665	0.033564	0.237948
ENSMUSG00000034883	2.22189	2.72911e-07	1.24565e-05
ENSMUSG00000034906	0.732661	0.00275945	0.0406922
ENSMUSG00000034910	-0.623238	0.011351	0.115617
ENSMUSG00000034947	1.14696	6.93955e-07	2.98077e-05
ENSMUSG00000034959	0.773863	0.0120002	0.120491
ENSMUSG00000034987	1.38816	4.5388e-05	0.00128666
ENSMUSG00000034997	1.12733	0.00336776	0.0472916
ENSMUSG00000035004	0.946215	0.000407117	0.00853576
ENSMUSG00000035041	1.65674	0.000994216	0.0180407
ENSMUSG00000035104	0.547146	0.0240261	0.191774
ENSMUSG00000035105	0.99603	0.000450184	0.00933985
ENSMUSG00000035186	2.42119	1.90577e-06	7.50124e-05
ENSMUSG00000035200	1.2949	0.00489255	0.063135
ENSMUSG00000035208	0.704752	0.0349251	0.243521
ENSMUSG00000035258	-0.79763	0.00161478	0.026528
ENSMUSG00000035273	1.11755	2.20877e-05	0.000690884
ENSMUSG00000035275	-0.556823	0.00642446	0.0771139
ENSMUSG00000035337	0.867432	0.0171046	0.154451
ENSMUSG00000035352	2.91633	2.24787e-12	2.24532e-10
ENSMUSG00000035356	0.619751	0.00599543	0.0732176
ENSMUSG00000035365	2.50287	4.03958e-13	4.55012e-11
ENSMUSG00000035373	4.4245	1.48892e-26	5.73262e-24
ENSMUSG00000035385	4.08702	3.32045e-30	1.75785e-27
ENSMUSG00000035435	-0.614355	0.00545557	0.0685214
ENSMUSG00000035439	0.643186	0.0145582	0.137935
ENSMUSG00000035448	1.7684	8.18663e-11	6.61679e-09
ENSMUSG00000035455	2.04785	7.50906e-06	0.000261533
ENSMUSG00000035493	1.27147	1.06546e-05	0.000359843
ENSMUSG00000035528	0.979714	0.0317975	NA
ENSMUSG00000035559	0.517923	0.0493264	0.297758
ENSMUSG00000035620	-0.502211	0.0343416	0.241362
ENSMUSG00000035649	-0.762197	0.0282291	0.213779
ENSMUSG00000035673	0.769128	0.0176485	0.157491
ENSMUSG00000035683	2.65563	2.80684e-10	2.08553e-08
ENSMUSG00000035692	1.31468	1.52415e-06	6.13601e-05
ENSMUSG00000035711	0.96812	0.000614541	0.0120831
ENSMUSG00000035770	-0.529041	0.0209925	0.175915
ENSMUSG00000035778	-0.472999	0.0360479	0.248325
ENSMUSG00000035783	1.03665	6.3843e-05	0.001719
ENSMUSG00000035835	0.600082	0.0466118	0.287017
ENSMUSG00000035852	0.464754	0.0496926	0.298946
ENSMUSG00000035860	-0.6608	0.0147377	0.139075
ENSMUSG00000035877	-0.662265	0.0268507	0.206836
ENSMUSG00000035878	-0.507278	0.0359957	0.248207
ENSMUSG00000035885	0.542036	0.0414072	0.268969
ENSMUSG00000035896	1.24874	0.00541552	0.0682207
ENSMUSG00000035901	-0.53902	0.0222928	0.182793
ENSMUSG00000035914	0.518578	0.049873	0.299484
ENSMUSG00000035930	-0.917341	0.0226615	0.18464
ENSMUSG00000035932	-1.09076	0.000273392	0.00609405
ENSMUSG00000035948	-0.560437	0.01515	0.141871
ENSMUSG00000035960	1.08047	7.93016e-05	0.00208629
ENSMUSG00000036022	0.957815	0.000363341	0.00774834
ENSMUSG00000036026	-0.617899	0.0169374	0.15346
ENSMUSG00000036030	-1.38285	0.00744848	0.0858622
ENSMUSG00000036040	-0.602883	0.00742589	0.0857886
ENSMUSG00000036062	-0.768233	0.00876462	0.0963153
ENSMUSG00000036067	1.81815	9.82602e-10	6.79986e-08
ENSMUSG00000036095	-0.747002	0.014918	0.140339
ENSMUSG00000036098	-0.664349	0.0353824	0.245413
ENSMUSG00000036117	2.11203	3.51696e-05	0.00103726
ENSMUSG00000036158	-0.557353	0.0413471	0.268826
ENSMUSG00000036167	-0.440374	0.0448482	0.280818
ENSMUSG00000036172	1.59364	0.000691356	0.013273
ENSMUSG00000036186	0.606922	0.0341498	0.240433
ENSMUSG00000036197	-0.51075	0.0287272	0.215642
ENSMUSG00000036223	3.50833	3.52428e-19	7.53839e-17
ENSMUSG00000036246	0.620849	0.0289379	0.21622
ENSMUSG00000036249	1.13564	0.00334764	0.0471882
ENSMUSG00000036306	-0.521452	0.0311377	0.226184
ENSMUSG00000036322	1.05578	0.000133574	0.0032967
ENSMUSG00000036353	0.769296	0.0141605	0.135439
ENSMUSG00000036356	-0.562118	0.0193253	0.166084
ENSMUSG00000036381	0.609523	0.01325	0.128962
ENSMUSG00000036395	-0.844393	0.00766099	0.0876914
ENSMUSG00000036411	0.806933	0.0204002	0.172453
ENSMUSG00000036412	1.73395	1.68496e-06	6.70691e-05
ENSMUSG00000036437	0.520069	0.0166043	0.151545
ENSMUSG00000036450	-0.589766	0.00859384	0.0948818
ENSMUSG00000036469	0.748514	0.00575588	0.0713616
ENSMUSG00000036478	0.587802	0.0290209	0.216576
ENSMUSG00000036504	1.44597	0.000201784	0.00466992
ENSMUSG00000036528	-0.52846	0.00938096	0.100583
ENSMUSG00000036560	0.757409	0.0294326	0.218188
ENSMUSG00000036580	-0.411939	0.043202	0.275556
ENSMUSG00000036585	-0.884629	4.86458e-05	0.001359
ENSMUSG00000036594	1.17458	1.36024e-05	0.000448667
ENSMUSG00000036596	1.0162	0.001515	0.025162
ENSMUSG00000036599	-0.594181	0.0299759	0.220636
ENSMUSG00000036634	0.97519	0.00298543	0.0432418
ENSMUSG00000036639	0.83049	0.0128407	0.126295
ENSMUSG00000036661	-0.721593	0.0220746	0.1819
ENSMUSG00000036678	0.544753	0.0339011	0.239376
ENSMUSG00000036768	1.95613	4.56438e-10	3.25439e-08
ENSMUSG00000036777	2.02003	3.04493e-12	3.01306e-10
ENSMUSG00000036805	1.29295	7.56323e-05	0.00200449
ENSMUSG00000036814	2.12307	5.9555e-16	9.48223e-14
ENSMUSG00000036817	-0.634441	0.0244145	0.193924
ENSMUSG00000036820	1.21759	1.28341e-06	5.2365e-05
ENSMUSG00000036833	0.759452	0.000520355	0.0105445
ENSMUSG00000036860	0.502015	0.049066	0.296525
ENSMUSG00000036863	-0.547799	0.0112638	0.115061
ENSMUSG00000036867	-0.528727	0.0429246	0.274365
ENSMUSG00000036875	1.0335	0.000157804	0.00380599
ENSMUSG00000036887	2.90683	3.02748e-25	1.0685e-22
ENSMUSG00000036896	3.0724	1.81136e-48	2.25631e-45
ENSMUSG00000036905	3.20411	9.42759e-38	7.12995e-35
ENSMUSG00000036908	1.01143	2.63976e-05	0.000795157
ENSMUSG00000036913	-0.97949	0.0159967	0.147602
ENSMUSG00000036928	1.57693	0.00101417	0.018293
ENSMUSG00000036931	0.808507	0.00409839	0.0554907
ENSMUSG00000036941	-0.542131	0.0147155	0.13899
ENSMUSG00000036949	1.94128	9.45568e-07	3.93386e-05
ENSMUSG00000036986	0.54602	0.0145123	0.137685
ENSMUSG00000036989	-0.574734	0.0401754	0.264209
ENSMUSG00000037005	-0.584238	0.0206408	0.17388
ENSMUSG00000037007	-0.603684	0.0158992	0.146894
ENSMUSG00000037010	-0.776614	0.00276833	0.0407948
ENSMUSG00000037031	-0.626908	0.00828905	0.0927743
ENSMUSG00000037095	1.98466	1.52971e-14	2.17404e-12
ENSMUSG00000037103	0.624249	0.0230427	0.186526
ENSMUSG00000037106	5.12586	2.8936e-40	2.78522e-37
ENSMUSG00000037108	1.03522	0.0101369	0.106311
ENSMUSG00000037126	0.696773	0.0211574	0.176641
ENSMUSG00000037185	-0.607874	0.0448266	0.280818
ENSMUSG00000037211	-0.540188	0.0263289	0.203779
ENSMUSG00000037217	2.21124	9.8783e-09	5.68432e-07
ENSMUSG00000037243	0.509005	0.0323631	0.231762
ENSMUSG00000037280	1.31498	4.5114e-06	0.000164713
ENSMUSG00000037313	1.53569	4.9452e-06	0.000179401
ENSMUSG00000037321	1.1067	0.000332972	0.00716567
ENSMUSG00000037337	1.20373	0.00013854	0.0034113
ENSMUSG00000037362	0.574503	0.0235327	0.188904
ENSMUSG00000037366	-0.802271	0.0014258	0.023849
ENSMUSG00000037370	0.948934	0.000893959	0.0165621
ENSMUSG00000037447	0.664471	0.0158345	0.146589
ENSMUSG00000037466	1.79831	1.1981e-09	8.1842e-08
ENSMUSG00000037474	2.36261	2.84337e-11	2.47782e-09
ENSMUSG00000037492	-0.987186	0.00678722	0.0803389
ENSMUSG00000037544	2.85874	5.13201e-17	8.90782e-15
ENSMUSG00000037548	1.30808	8.43274e-07	3.56812e-05
ENSMUSG00000037553	-0.477534	0.0406669	0.266279
ENSMUSG00000037572	0.936041	0.00397981	0.0541622
ENSMUSG00000037580	0.632734	0.00363127	0.0503245
ENSMUSG00000037605	-0.854731	0.00281665	0.0413343
ENSMUSG00000037621	-0.496387	0.0279123	0.212053
ENSMUSG00000037624	-0.530254	0.0145087	0.137685
ENSMUSG00000037628	3.14086	2.18445e-13	2.56989e-11
ENSMUSG00000037638	0.775182	0.02831	0.213952
ENSMUSG00000037643	-0.598349	0.00453588	0.05992
ENSMUSG00000037649	1.09463	2.9078e-05	0.000868019
ENSMUSG00000037661	2.20227	9.00649e-11	7.18072e-09
ENSMUSG00000037664	-0.634973	0.00924008	0.0996272
ENSMUSG00000037681	-0.785255	0.00359133	0.0499016
ENSMUSG00000037686	0.74678	0.0358372	0.247517
ENSMUSG00000037692	-1.2533	0.000645788	0.0125691
ENSMUSG00000037709	-1.5259	8.44176e-07	3.56812e-05
ENSMUSG00000037712	-0.581503	0.0105802	0.109789
ENSMUSG00000037725	2.85589	1.11803e-25	4.08198e-23
ENSMUSG00000037731	1.02059	0.000174083	0.00414201
ENSMUSG00000037736	-0.788827	0.00171358	0.0278914
ENSMUSG00000037754	-0.938436	0.00402521	0.0547098
ENSMUSG00000037759	0.604527	0.00899944	0.0980309
ENSMUSG00000037762	-0.669243	0.00242943	0.0370379
ENSMUSG00000037815	-0.465287	0.0269846	0.207307
ENSMUSG00000037846	-0.817631	0.000417895	0.00874441
ENSMUSG00000037860	0.887113	0.00667515	0.0793227
ENSMUSG00000037868	2.23071	1.5617e-16	2.64564e-14
ENSMUSG00000037887	-0.625591	0.00419774	0.0565986
ENSMUSG00000037902	0.552248	0.0299409	0.220455
ENSMUSG00000037905	0.501217	0.0307572	0.224246
ENSMUSG00000037921	0.605463	0.0293417	0.218111
ENSMUSG00000037922	0.693091	0.017641	0.15749
ENSMUSG00000037966	0.870316	0.0100059	0.105365
ENSMUSG00000037973	-0.614365	0.00743837	0.0858163
ENSMUSG00000037991	2.39471	1.60673e-13	1.94423e-11
ENSMUSG00000038022	-0.56256	0.0109837	0.112908
ENSMUSG00000038034	0.835444	0.00111924	0.0198003
ENSMUSG00000038037	1.38148	0.00179999	0.0290966
ENSMUSG00000038077	-1.1024	0.00894426	0.0976423
ENSMUSG00000038112	1.4102	0.00250085	0.0378813
ENSMUSG00000038115	1.14844	0.0265076	0.205087
ENSMUSG00000038145	-1.26964	0.0020153	0.0321335
ENSMUSG00000038147	1.38822	2.3188e-06	8.92782e-05
ENSMUSG00000038173	-0.792181	0.0109675	0.112851
ENSMUSG00000038180	2.72389	1.41279e-07	6.78397e-06
ENSMUSG00000038209	4.29604	3.7043e-22	1.07455e-19
ENSMUSG00000038224	-1.00304	0.0448304	0.280818
ENSMUSG00000038239	-1.12887	0.0279335	0.212053
ENSMUSG00000038244	-0.548466	0.0485529	0.294939
ENSMUSG00000038252	1.66192	3.0621e-09	1.94724e-07
ENSMUSG00000038259	0.668257	0.0439511	0.278054
ENSMUSG00000038267	-0.570298	0.0380958	0.257291
ENSMUSG00000038276	0.933417	0.0381751	NA
ENSMUSG00000038295	0.815285	0.0444709	0.279618
ENSMUSG00000038301	0.872406	0.000911006	0.0168337
ENSMUSG00000038347	-0.779817	0.00825738	0.0925666
ENSMUSG00000038379	2.8707	2.08394e-10	1.59312e-08
ENSMUSG00000038388	0.97711	0.000119893	0.0029904
ENSMUSG00000038393	-0.48213	0.0387165	0.25904
ENSMUSG00000038400	0.503524	0.028376	0.214144
ENSMUSG00000038403	-1.19511	0.0140871	0.134859
ENSMUSG00000038495	-0.657871	0.00526912	0.0667737
ENSMUSG00000038496	-0.775428	0.00416406	0.0562719
ENSMUSG00000038521	0.693884	0.0091596	0.099091
ENSMUSG00000038523	1.7228	0.000866694	0.0161134
ENSMUSG00000038526	-0.591714	0.0381866	0.257511
ENSMUSG00000038527	0.535477	0.0239436	0.19126
ENSMUSG00000038533	-1.0738	0.0147102	0.13899
ENSMUSG00000038542	-0.638699	0.0426276	0.273322
ENSMUSG00000038550	0.835658	0.00333342	0.0470276
ENSMUSG00000038578	1.67206	3.34704e-10	2.44403e-08
ENSMUSG00000038583	-0.927612	0.0478441	0.292057
ENSMUSG00000038587	-0.909527	0.000650032	0.0126111
ENSMUSG00000038594	-0.505175	0.0436009	0.276775
ENSMUSG00000038642	2.09714	3.4808e-10	2.52429e-08
ENSMUSG00000038644	0.686401	0.027239	0.208612
ENSMUSG00000038650	0.571226	0.0240792	0.192125
ENSMUSG00000038663	-0.707095	0.0172041	0.154888
ENSMUSG00000038700	-0.537998	0.0169024	0.153221
ENSMUSG00000038725	-0.706064	0.0365787	0.250215
ENSMUSG00000038729	1.295	0.0119121	0.119891
ENSMUSG00000038775	0.543586	0.0485034	0.294722
ENSMUSG00000038776	-0.672667	0.00143345	0.0239391
ENSMUSG00000038793	0.663014	0.0238692	0.190738
ENSMUSG00000038797	0.762853	0.00699926	0.0821251
ENSMUSG00000038836	-0.526362	0.0482315	0.293173
ENSMUSG00000038859	-0.680637	0.00100328	0.0181431
ENSMUSG00000038879	-0.502503	0.0231478	0.186948
ENSMUSG00000038910	0.705702	0.00512626	0.0651583
ENSMUSG00000038943	2.22365	2.00362e-11	1.79024e-09
ENSMUSG00000038949	-0.777325	0.0411609	0.268274
ENSMUSG00000038957	-0.48031	0.0288923	0.216115
ENSMUSG00000038963	1.23958	4.11739e-05	0.00118787
ENSMUSG00000038970	-0.631647	0.0353084	0.245144
ENSMUSG00000039004	-0.867765	0.00112699	0.0198876
ENSMUSG00000039055	1.97183	4.25941e-05	0.00122384
ENSMUSG00000039062	0.809727	0.000143709	0.00353037
ENSMUSG00000039084	1.24502	0.000112541	0.00286394
ENSMUSG00000039100	-0.428552	0.0474177	0.290291
ENSMUSG00000039109	1.05712	3.85511e-06	0.00014272
ENSMUSG00000039116	-0.614184	0.0247281	0.19588
ENSMUSG00000039126	1.68285	6.48878e-09	3.85973e-07
ENSMUSG00000039145	0.560547	0.0468997	0.288291
ENSMUSG00000039146	1.00994	0.000254972	0.00573172
ENSMUSG00000039159	-0.413803	0.0439571	0.278054
ENSMUSG00000039167	-0.596664	0.0145356	0.137783
ENSMUSG00000039179	-0.483485	0.0462545	0.285686
ENSMUSG00000039183	0.460464	0.0413347	0.268826
ENSMUSG00000039187	1.77301	9.84149e-08	4.79088e-06
ENSMUSG00000039196	1.72342	0.000839002	0.0156486
ENSMUSG00000039198	1.05066	0.0316521	NA
ENSMUSG00000039202	-0.630464	0.0237096	0.18982
ENSMUSG00000039206	0.738175	0.000589034	0.0117011
ENSMUSG00000039208	1.4865	7.58206e-10	5.29893e-08
ENSMUSG00000039239	-0.611	0.0175953	0.157281
ENSMUSG00000039257	1.15271	0.0248886	0.196829
ENSMUSG00000039264	0.569554	0.0370122	0.252259
ENSMUSG00000039313	1.35189	0.00568652	NA
ENSMUSG00000039316	0.656915	0.0174058	0.155982
ENSMUSG00000039328	-0.581838	0.0184633	0.161628
ENSMUSG00000039349	-0.763712	0.00105664	0.0189302
ENSMUSG00000039382	-0.519746	0.0324235	0.232038
ENSMUSG00000039396	3.50469	3.02038e-20	7.35168e-18
ENSMUSG00000039431	1.02291	0.00879456	0.0965486
ENSMUSG00000039476	0.823292	0.0363894	0.249622
ENSMUSG00000039496	-0.73518	0.0268711	0.206917
ENSMUSG00000039497	0.580767	0.0184574	0.161628
ENSMUSG00000039519	1.72094	1.23726e-10	9.70378e-09
ENSMUSG00000039521	1.68026	0.000450747	0.00933985
ENSMUSG00000039601	-0.800902	0.00113542	0.019936
ENSMUSG00000039607	-0.526303	0.0205279	0.173256
ENSMUSG00000039672	-0.689893	0.00755949	0.0867641
ENSMUSG00000039682	0.832299	0.000747052	0.0141752
ENSMUSG00000039706	-0.572418	0.0213714	0.177893
ENSMUSG00000039735	-0.635777	0.0062995	0.0759671
ENSMUSG00000039748	2.07139	2.91046e-07	1.32257e-05
ENSMUSG00000039760	-1.16293	0.000155798	0.00378346
ENSMUSG00000039763	-0.620935	0.005593	0.0699571
ENSMUSG00000039774	0.91802	0.00345348	0.0482394
ENSMUSG00000039783	1.37069	1.54398e-06	6.20403e-05
ENSMUSG00000039787	0.653783	0.00917581	0.099091
ENSMUSG00000039798	1.22296	0.0121403	0.121495
ENSMUSG00000039814	2.29485	5.3706e-08	2.70137e-06
ENSMUSG00000039831	-0.616199	0.00956347	0.101983
ENSMUSG00000039879	-0.871782	0.0359801	0.248181
ENSMUSG00000039891	-1.08255	0.0277337	0.21128
ENSMUSG00000039899	0.913873	8.05881e-05	0.00211466
ENSMUSG00000039936	0.94991	0.00459381	0.060459
ENSMUSG00000039942	1.75964	3.88932e-15	5.71947e-13
ENSMUSG00000039954	-0.84181	0.00287842	0.0421239
ENSMUSG00000039977	1.86545	1.68573e-12	1.7245e-10
ENSMUSG00000039981	0.827161	0.0136129	0.131387
ENSMUSG00000040010	1.69461	1.45035e-08	8.14659e-07
ENSMUSG00000040017	2.65914	2.84342e-07	1.29489e-05
ENSMUSG00000040026	5.45288	6.45624e-62	1.13931e-58
ENSMUSG00000040037	-0.936222	0.00039236	0.00825604
ENSMUSG00000040046	2.70556	1.69724e-07	8.00464e-06
ENSMUSG00000040061	0.639499	0.030422	0.222897
ENSMUSG00000040084	2.37847	4.89965e-17	8.5748e-15
ENSMUSG00000040147	-0.640606	0.00427871	0.0572731
ENSMUSG00000040152	0.888335	1.56976e-05	0.000508275
ENSMUSG00000040170	-0.835385	0.000806944	0.0151101
ENSMUSG00000040181	-0.560245	0.00670539	0.0795926
ENSMUSG00000040197	6.29647	4.87942e-74	1.72211e-70
ENSMUSG00000040204	2.98279	8.1435e-25	2.7814e-22
ENSMUSG00000040209	-0.677093	0.0292784	0.217806
ENSMUSG00000040212	0.782079	0.00313428	0.0449063
ENSMUSG00000040229	1.21538	6.38199e-05	0.001719
ENSMUSG00000040247	0.76356	0.00882493	0.096677
ENSMUSG00000040260	-0.737361	0.0101525	0.106378
ENSMUSG00000040263	0.477201	0.0338931	0.239376
ENSMUSG00000040276	1.28727	0.00463835	0.0608938
ENSMUSG00000040298	1.68571	0.00113593	0.019936
ENSMUSG00000040314	1.17102	0.0137932	NA
ENSMUSG00000040328	0.766486	0.0251682	0.19749
ENSMUSG00000040345	0.939561	0.000174533	0.00414768
ENSMUSG00000040364	0.791661	0.00784961	0.0891998
ENSMUSG00000040405	1.45026	0.00061609	0.0121023
ENSMUSG00000040413	2.25152	1.31887e-05	0.00043638
ENSMUSG00000040446	-0.449616	0.0399275	0.263271
ENSMUSG00000040466	0.576848	0.0358145	0.247442
ENSMUSG00000040488	-0.856952	0.0061636	0.0748718
ENSMUSG00000040522	1.39437	1.52827e-05	0.000495598
ENSMUSG00000040528	1.25394	0.00015606	0.00378503
ENSMUSG00000040532	0.59845	0.0250357	0.197145
ENSMUSG00000040537	-0.703746	0.00835498	0.0931345
ENSMUSG00000040552	3.3195	2.78756e-34	1.84467e-31
ENSMUSG00000040563	0.788247	0.00608477	0.0741802
[truncated: 1,609 more rows]

## Sheet: c_vs_COPD
gene_ID	log2FoldChange	pvalue	padj
ENSMUSG00000000031	-0.691647	0.0142934	0.241851
ENSMUSG00000000120	0.927469	0.000304002	0.0199742
ENSMUSG00000000127	-0.34557	0.0404398	0.413637
ENSMUSG00000000149	0.332137	0.0480857	0.44651
ENSMUSG00000000216	-0.412668	0.00705647	0.163732
ENSMUSG00000000282	0.359934	0.0445158	0.433952
ENSMUSG00000000290	0.55958	0.00188609	0.0730359
ENSMUSG00000000318	0.511505	0.04825	0.447351
ENSMUSG00000000326	0.354639	0.0352993	0.388421
ENSMUSG00000000359	0.482334	0.0109158	0.2061
ENSMUSG00000000386	0.60152	0.0289842	0.353879
ENSMUSG00000000409	0.447437	0.037925	0.400086
ENSMUSG00000000544	0.509735	0.0211282	NA
ENSMUSG00000000552	0.630925	0.0010138	0.0479107
ENSMUSG00000000594	0.404369	0.0114147	0.211555
ENSMUSG00000000605	-0.421427	0.0201621	0.293813
ENSMUSG00000000682	0.501903	0.0326264	0.375321
ENSMUSG00000000794	0.800607	0.000729128	0.0375798
ENSMUSG00000000861	0.532602	0.025161	0.329974
ENSMUSG00000000903	0.876278	0.000110724	0.00973517
ENSMUSG00000000948	-0.56384	0.046148	0.439707
ENSMUSG00000001089	-0.50402	0.0296257	0.357726
ENSMUSG00000001128	0.966682	5.50643e-07	0.000204525
ENSMUSG00000001158	-0.344548	0.0233866	0.316459
ENSMUSG00000001248	0.347463	0.0298233	0.358882
ENSMUSG00000001348	0.966859	1.27688e-06	0.000363113
ENSMUSG00000001419	0.357227	0.0349366	0.387238
ENSMUSG00000001424	-0.317491	0.0466029	0.441068
ENSMUSG00000001504	-0.44391	0.00627746	0.153561
ENSMUSG00000001763	0.50771	0.0257584	0.334746
ENSMUSG00000001773	0.577232	0.0197672	NA
ENSMUSG00000001833	-0.488273	0.0159202	0.256151
ENSMUSG00000001918	0.321792	0.0371968	0.396146
ENSMUSG00000001930	-0.307428	0.0430814	0.426595
ENSMUSG00000001946	-0.340983	0.0216577	0.305992
ENSMUSG00000002033	0.561194	0.0082177	0.176049
ENSMUSG00000002058	0.361553	0.0408886	0.414182
ENSMUSG00000002083	0.447839	0.0264579	0.338631
ENSMUSG00000002111	0.585443	0.00171359	0.0682435
ENSMUSG00000002325	-0.424568	0.0286882	0.352361
ENSMUSG00000002477	-0.494613	0.00129911	0.0563943
ENSMUSG00000002489	0.361131	0.0495516	0.455015
ENSMUSG00000002565	0.627762	0.0229608	0.314673
ENSMUSG00000002588	-0.377728	0.0348838	0.387125
ENSMUSG00000002602	0.722044	0.000260614	0.0178315
ENSMUSG00000002617	-0.690727	0.00794746	0.173329
ENSMUSG00000002668	0.475543	0.0111519	0.208289
ENSMUSG00000002688	-0.381054	0.0150203	0.248066
ENSMUSG00000002699	0.646411	8.83959e-05	0.0083329
ENSMUSG00000002741	-0.425547	0.0387798	0.40331
ENSMUSG00000002778	-0.392168	0.0115657	0.213879
ENSMUSG00000002847	0.619161	0.0234717	0.317139
ENSMUSG00000003032	0.364796	0.038065	0.400731
ENSMUSG00000003206	0.993251	2.75586e-06	0.000651384
ENSMUSG00000003226	-0.542829	0.00749526	0.168412
ENSMUSG00000003233	0.499354	0.0312745	0.368412
ENSMUSG00000003279	0.550201	0.0461299	NA
ENSMUSG00000003363	0.62186	5.80403e-05	0.00617739
ENSMUSG00000003418	0.757476	0.00249307	0.0877639
ENSMUSG00000003452	-0.69953	0.00217825	0.0802133
ENSMUSG00000003863	0.586002	0.031222	0.368031
ENSMUSG00000004044	-0.395245	0.0123182	0.221095
ENSMUSG00000004187	0.423064	0.0486142	0.448907
ENSMUSG00000004266	0.434381	0.0139718	0.238767
ENSMUSG00000004296	0.869108	0.00180126	0.0711126
ENSMUSG00000004455	-0.737738	0.0080102	0.173715
ENSMUSG00000004552	0.416177	0.0350709	0.387657
ENSMUSG00000004609	0.642577	0.00289856	0.0967959
ENSMUSG00000004698	0.904868	0.000400292	0.02478
ENSMUSG00000004707	0.447368	0.036144	0.39156
ENSMUSG00000004730	0.84827	6.68197e-06	0.00129374
ENSMUSG00000004789	-0.57139	0.0198395	0.291132
ENSMUSG00000004815	0.435735	0.0079678	0.173462
ENSMUSG00000004892	-1.01613	7.40864e-05	0.00732811
ENSMUSG00000004902	0.779918	0.00468497	0.130178
ENSMUSG00000004933	0.598237	0.0238504	0.320187
ENSMUSG00000004951	-0.382587	0.0265519	0.33912
ENSMUSG00000005045	0.941953	3.03391e-05	0.00375627
ENSMUSG00000005057	0.465923	0.0368689	0.394302
ENSMUSG00000005087	0.616631	0.0108289	0.205701
ENSMUSG00000005125	0.359364	0.0191658	0.285407
ENSMUSG00000005237	0.563648	0.00247608	0.0873363
ENSMUSG00000005373	0.663318	0.0195113	0.287549
ENSMUSG00000005465	0.447733	0.0301032	0.360929
ENSMUSG00000005547	0.674558	0.00772728	0.171508
ENSMUSG00000005583	-1.62288	1.60347e-14	2.64957e-11
ENSMUSG00000005667	0.48984	0.0360853	0.39139
ENSMUSG00000005705	0.628668	0.0236239	0.318486
ENSMUSG00000005718	0.517065	0.0104412	0.202413
ENSMUSG00000005824	0.616068	0.00677926	0.161074
ENSMUSG00000005917	1.0412	0.000208968	0.0156511
ENSMUSG00000005947	0.710586	0.00102681	0.0480412
ENSMUSG00000005968	-0.444985	0.002698	0.092127
ENSMUSG00000005973	-0.353004	0.0117776	0.215742
ENSMUSG00000006218	0.570436	0.0444563	0.433604
ENSMUSG00000006269	0.806174	0.00420324	0.121814
ENSMUSG00000006313	-0.582902	0.0223213	0.311198
ENSMUSG00000006335	-0.62892	0.00701728	0.163451
ENSMUSG00000006356	-0.414363	0.0138227	0.237333
ENSMUSG00000006390	0.449538	0.0437043	0.429491
ENSMUSG00000006435	0.433964	0.0195123	0.287549
ENSMUSG00000006457	-0.58587	0.0371405	0.396146
ENSMUSG00000006476	0.375107	0.0172991	0.267952
ENSMUSG00000006529	0.599621	0.0342598	0.383709
ENSMUSG00000006542	-0.632697	0.000503343	0.0287146
ENSMUSG00000006649	-0.657361	0.00893157	0.185989
ENSMUSG00000006678	-0.378706	0.0282839	0.350181
ENSMUSG00000006731	0.621669	0.000290389	0.0192184
ENSMUSG00000006800	0.679694	1.84873e-05	0.00260829
ENSMUSG00000007440	-0.709287	0.0103314	0.201318
ENSMUSG00000007480	-0.630035	0.00577393	NA
ENSMUSG00000007613	0.486609	0.0160431	0.25771
ENSMUSG00000007827	-0.415703	0.0493556	0.45355
ENSMUSG00000007891	0.366672	0.0395542	0.407868
ENSMUSG00000008193	0.948523	0.000156948	0.012752
ENSMUSG00000008206	-0.493265	0.00719702	0.165424
ENSMUSG00000008305	-0.362336	0.0149888	0.247997
ENSMUSG00000008318	0.834498	0.000493866	0.0283162
ENSMUSG00000008348	-0.569457	0.00699864	0.163451
ENSMUSG00000008496	0.654644	0.0125629	0.223285
ENSMUSG00000009097	0.440214	0.04116	0.41525
ENSMUSG00000009185	1.44913	3.35946e-07	0.000142191
ENSMUSG00000009292	0.434709	0.045573	0.438367
ENSMUSG00000009549	-0.460334	0.00324137	0.102418
ENSMUSG00000009628	-0.688934	0.00990806	0.197071
ENSMUSG00000009687	0.486067	0.00379288	0.1141
ENSMUSG00000010021	0.820994	0.000248098	0.0174848
ENSMUSG00000010044	0.430088	0.0330394	0.377001
ENSMUSG00000010066	0.776592	0.00580446	0.148651
ENSMUSG00000010136	0.453303	0.0231075	0.315496
ENSMUSG00000010142	0.528732	0.015004	0.248023
ENSMUSG00000010175	0.644678	0.00479403	0.1318
ENSMUSG00000010307	0.557994	0.00090384	0.0437171
ENSMUSG00000010609	-0.453131	0.0272996	0.344319
ENSMUSG00000011008	0.999152	6.06248e-05	0.00619594
ENSMUSG00000011034	0.592405	0.0210449	0.301351
ENSMUSG00000011256	0.34825	0.0311575	0.367748
ENSMUSG00000011305	0.676816	0.00403384	0.118592
ENSMUSG00000012350	0.418527	0.0431554	0.426863
ENSMUSG00000012428	0.755149	0.0010736	0.0498457
ENSMUSG00000012889	1.0826	4.21329e-05	0.00487959
ENSMUSG00000013275	0.446647	0.00239773	0.0857341
ENSMUSG00000013707	0.409827	0.045958	0.438886
ENSMUSG00000013878	-0.574644	0.0311515	0.367748
ENSMUSG00000013974	0.690157	0.00131849	0.0568639
ENSMUSG00000014158	0.52079	0.0202478	0.294337
ENSMUSG00000014453	0.687568	0.0100452	0.198855
ENSMUSG00000014602	0.49738	0.0118113	0.215852
ENSMUSG00000015134	0.77376	0.00367498	0.111847
ENSMUSG00000015314	0.49235	0.012351	0.22114
ENSMUSG00000015316	0.50346	0.0189957	0.284226
ENSMUSG00000015340	0.811634	8.10018e-06	0.00150432
ENSMUSG00000015354	-0.315234	0.0469928	0.443307
ENSMUSG00000015355	0.61597	0.000648287	0.0342989
ENSMUSG00000015396	0.581902	0.000532405	0.0299993
ENSMUSG00000015452	-0.518459	0.00278531	0.0943996
ENSMUSG00000015476	0.723188	0.00968902	0.194261
ENSMUSG00000015568	0.561665	0.00599383	0.15004
ENSMUSG00000015653	0.466917	0.0402854	0.413067
ENSMUSG00000015709	1.01454	7.68327e-05	0.00755867
ENSMUSG00000015829	-0.451121	0.0491704	NA
ENSMUSG00000015882	-0.424491	0.0355243	0.389332
ENSMUSG00000015947	0.832944	0.000186281	0.0144269
ENSMUSG00000015950	0.840029	1.21427e-05	0.00198175
ENSMUSG00000015957	0.43186	0.0290298	0.353879
ENSMUSG00000015966	0.674843	0.015114	0.248705
ENSMUSG00000015981	-0.462738	0.00907421	0.187158
ENSMUSG00000016024	0.455251	0.0208222	0.299813
ENSMUSG00000016028	0.492628	0.00122418	0.0545408
ENSMUSG00000016239	-0.425985	0.0413041	0.416243
ENSMUSG00000016252	-0.481739	0.0186504	0.281691
ENSMUSG00000016255	0.576729	0.0124355	0.221869
ENSMUSG00000016283	0.576393	0.0298838	0.359
ENSMUSG00000016308	-0.468594	0.0307958	0.365613
ENSMUSG00000016496	0.774988	5.01518e-05	0.00559977
ENSMUSG00000016552	0.446766	0.0459246	0.438886
ENSMUSG00000017002	0.466176	0.0297971	0.358882
ENSMUSG00000017007	0.415029	0.0109427	0.206167
ENSMUSG00000017390	0.559949	0.00946547	0.191788
ENSMUSG00000017400	0.863521	0.000367779	0.0231612
ENSMUSG00000017607	0.565227	0.027654	0.346425
ENSMUSG00000017639	0.359513	0.0453113	0.43784
ENSMUSG00000017801	-0.462163	0.0253857	0.331362
ENSMUSG00000017929	0.390949	0.0100862	0.198883
ENSMUSG00000018008	0.763154	1.88295e-05	0.002616
ENSMUSG00000018168	0.597273	0.00319984	0.102035
ENSMUSG00000018189	-0.449505	0.0101923	0.199891
ENSMUSG00000018199	-0.402325	0.017097	0.26669
ENSMUSG00000018379	-0.775689	9.64016e-06	0.00170341
ENSMUSG00000018486	0.673139	0.0164379	0.261284
ENSMUSG00000018581	0.473676	0.0142984	0.241851
ENSMUSG00000018599	0.648667	0.0157109	0.253941
ENSMUSG00000018654	0.473496	0.0320883	0.37293
ENSMUSG00000018774	0.80848	1.32229e-05	0.00207397
ENSMUSG00000018821	0.352129	0.0350501	0.387657
ENSMUSG00000018845	-0.354555	0.0210432	0.301351
ENSMUSG00000018906	-0.300255	0.0493672	0.45355
ENSMUSG00000018919	0.551593	0.0398668	NA
ENSMUSG00000018927	0.682387	0.00126936	0.0554011
ENSMUSG00000019027	0.685077	0.000188681	0.0144894
ENSMUSG00000019122	0.728263	0.000362912	0.022934
ENSMUSG00000019320	0.43397	0.0410331	0.41466
ENSMUSG00000019564	0.432155	0.0100487	0.198855
ENSMUSG00000019762	-0.532954	0.00206515	0.0776596
ENSMUSG00000019817	-0.636543	0.00689525	0.162557
ENSMUSG00000019832	0.485509	0.00896057	0.186167
ENSMUSG00000019850	0.85118	5.79025e-05	0.00617739
ENSMUSG00000019920	-1.03519	1.2623e-10	1.27632e-07
ENSMUSG00000019929	0.614105	0.00525498	0.140235
ENSMUSG00000019943	-0.73537	1.01672e-05	0.00176232
ENSMUSG00000019966	-0.491116	0.0120353	0.217519
ENSMUSG00000019971	-0.849017	0.000993501	0.0472107
ENSMUSG00000019982	0.457797	0.0151152	0.248705
ENSMUSG00000020017	1.38829	4.01733e-07	0.000162479
ENSMUSG00000020059	-0.631093	0.0110452	0.207321
ENSMUSG00000020070	-0.415488	0.0327489	0.375321
ENSMUSG00000020097	0.499389	0.0413357	0.416331
ENSMUSG00000020101	-0.615685	0.000931866	0.0446315
ENSMUSG00000020120	0.695743	0.00191327	0.0739312
ENSMUSG00000020143	0.668979	0.000114482	0.0100069
ENSMUSG00000020182	-0.54788	0.00494482	0.133922
ENSMUSG00000020218	-0.37375	0.0433392	0.427984
ENSMUSG00000020227	0.372716	0.0436205	0.429364
ENSMUSG00000020228	0.314823	0.0414041	0.416558
ENSMUSG00000020231	0.40506	0.0122229	0.220208
ENSMUSG00000020265	0.631966	0.00130259	0.0563943
ENSMUSG00000020272	0.432816	0.0101089	0.199115
ENSMUSG00000020279	0.728613	0.0057003	0.146948
ENSMUSG00000020312	0.603253	0.0048085	0.131998
ENSMUSG00000020329	0.392578	0.0479293	0.446136
ENSMUSG00000020334	0.541379	0.0499316	0.45689
ENSMUSG00000020340	0.646166	0.000159423	0.0128956
ENSMUSG00000020377	0.477243	0.030183	0.361266
ENSMUSG00000020400	0.319737	0.0424792	0.42224
ENSMUSG00000020437	0.469514	0.0205102	0.29691
ENSMUSG00000020483	-0.451825	0.0111404	0.208289
ENSMUSG00000020519	-0.498757	0.00112152	0.0511571
ENSMUSG00000020542	0.56235	0.0352007	0.387868
ENSMUSG00000020573	0.498404	0.00545838	0.143145
ENSMUSG00000020577	-0.319015	0.0245536	0.325711
ENSMUSG00000020580	-0.39643	0.0349351	0.387238
ENSMUSG00000020581	0.57344	0.019324	0.286866
ENSMUSG00000020608	-0.518823	0.0023519	0.0844272
ENSMUSG00000020620	-0.374144	0.0402738	0.413067
ENSMUSG00000020642	-0.319466	0.0242643	0.323287
ENSMUSG00000020651	1.72021	1.40258e-10	1.34352e-07
ENSMUSG00000020668	-0.44209	0.0220888	0.309005
ENSMUSG00000020679	0.390618	0.0119265	0.216413
ENSMUSG00000020686	0.622803	0.0152083	0.249361
ENSMUSG00000020728	-0.445287	0.0371801	0.396146
ENSMUSG00000020733	0.340327	0.0313838	0.368745
ENSMUSG00000020798	0.952677	0.000542767	0.0302091
ENSMUSG00000020810	0.319947	0.0456721	0.438367
ENSMUSG00000020838	0.543155	0.00242535	0.0865517
ENSMUSG00000020843	-0.565688	0.0282634	0.350166
ENSMUSG00000020884	-0.716117	0.00409019	0.119681
ENSMUSG00000020889	1.06207	4.05643e-11	4.34277e-08
ENSMUSG00000020894	0.433043	0.00955585	0.193026
ENSMUSG00000020901	0.845967	9.22099e-07	0.000279703
ENSMUSG00000020911	-0.391177	0.0194063	0.287022
ENSMUSG00000020941	0.669226	3.69789e-05	0.0043988
ENSMUSG00000020956	-0.492986	0.0297592	0.358687
ENSMUSG00000021032	-0.607691	0.00639419	0.155166
ENSMUSG00000021055	-0.55201	0.0125566	0.223285
ENSMUSG00000021062	0.368733	0.0319893	0.372254
ENSMUSG00000021136	0.750401	0.00345555	0.106957
ENSMUSG00000021156	-0.423954	0.00572877	0.147473
ENSMUSG00000021182	0.44601	0.0077638	0.171697
ENSMUSG00000021198	0.823756	0.00209849	0.0780106
ENSMUSG00000021209	-0.365508	0.041721	0.417899
ENSMUSG00000021219	-0.440113	0.0146826	0.244934
ENSMUSG00000021258	0.352703	0.0356559	0.389872
ENSMUSG00000021270	-0.483981	0.0109362	0.206167
ENSMUSG00000021277	0.742535	0.00224448	0.0816991
ENSMUSG00000021281	1.12143	8.50519e-07	0.000271569
ENSMUSG00000021282	-0.522573	0.00702946	0.163451
ENSMUSG00000021294	0.448247	0.0244943	0.325161
ENSMUSG00000021298	0.569076	0.00980213	0.195613
ENSMUSG00000021303	0.578125	0.0165098	0.261651
ENSMUSG00000021322	1.08518	4.74001e-05	0.00539176
ENSMUSG00000021356	0.835306	1.50901e-05	0.00225115
ENSMUSG00000021363	0.507844	0.0223532	0.311198
ENSMUSG00000021377	-0.364643	0.0343687	0.384219
ENSMUSG00000021388	-0.600602	0.00394656	0.117557
ENSMUSG00000021390	-0.46044	0.0280852	0.349252
ENSMUSG00000021403	-0.532836	0.0316348	0.369784
ENSMUSG00000021411	-0.571211	0.00162493	0.066013
ENSMUSG00000021423	0.61099	0.00120676	0.0539633
ENSMUSG00000021451	0.544455	0.00591234	0.148947
ENSMUSG00000021457	0.680283	1.98431e-05	0.00273519
ENSMUSG00000021461	-0.447302	0.0200732	0.292969
ENSMUSG00000021520	-0.38196	0.0246345	0.326309
ENSMUSG00000021537	-0.30262	0.0434113	0.42823
ENSMUSG00000021553	0.57551	0.0406617	0.413793
ENSMUSG00000021579	0.378484	0.0391728	NA
ENSMUSG00000021624	0.55163	0.00336171	0.104945
ENSMUSG00000021707	-0.386463	0.0353915	0.388965
ENSMUSG00000021720	0.460881	0.0178139	0.273443
ENSMUSG00000021737	-0.308349	0.032477	0.375321
ENSMUSG00000021751	0.465192	0.0310636	0.367405
ENSMUSG00000021759	-0.343329	0.027396	0.344528
ENSMUSG00000021770	-1.13924	8.96841e-09	6.27789e-06
ENSMUSG00000021772	-0.545595	0.00118329	0.053355
ENSMUSG00000021838	-0.603408	0.00144392	0.0611102
ENSMUSG00000021843	-0.417419	0.0259071	0.335116
ENSMUSG00000021880	0.481097	0.00931074	0.18969
ENSMUSG00000021886	0.505917	0.025023	0.328822
ENSMUSG00000021898	0.72246	0.00931774	0.18969
ENSMUSG00000021913	0.577165	0.0420833	0.41991
ENSMUSG00000021922	0.769812	0.00198827	0.0758628
ENSMUSG00000021948	0.324899	0.0366027	0.393288
ENSMUSG00000021950	0.783046	0.00054657	0.0302358
ENSMUSG00000021978	-0.496016	0.00046369	0.027145
ENSMUSG00000021998	0.620281	0.000169174	0.0133868
ENSMUSG00000022014	0.42456	0.0296689	0.357836
ENSMUSG00000022018	-0.605855	0.000258058	0.0177978
ENSMUSG00000022032	0.602939	0.00593623	0.149226
ENSMUSG00000022048	-0.421586	0.00226862	0.0820852
ENSMUSG00000022094	0.512307	0.00555114	0.144062
ENSMUSG00000022096	0.721202	5.11362e-06	0.00106974
ENSMUSG00000022106	0.369718	0.0220125	0.30865
ENSMUSG00000022126	0.531637	0.0322871	NA
ENSMUSG00000022132	-0.367919	0.0320705	0.37293
ENSMUSG00000022150	0.446955	0.0193606	0.287022
ENSMUSG00000022178	0.685373	0.00181521	0.0715084
ENSMUSG00000022186	-0.857759	6.16603e-07	0.000220043
ENSMUSG00000022218	0.606047	0.0105583	0.202906
ENSMUSG00000022262	0.734836	0.000596286	0.0321024
ENSMUSG00000022305	0.544547	0.00257876	0.0893971
ENSMUSG00000022321	0.376202	0.0403557	NA
ENSMUSG00000022322	-0.569074	0.0415626	0.417383
ENSMUSG00000022358	0.400836	0.018784	0.282303
ENSMUSG00000022436	0.383062	0.0260406	0.335562
ENSMUSG00000022439	0.667716	0.00046598	0.0271822
ENSMUSG00000022488	0.613307	0.000873825	0.0425868
ENSMUSG00000022489	0.527147	0.00697474	0.163451
ENSMUSG00000022490	0.820538	0.000796385	0.0396017
ENSMUSG00000022504	0.959933	5.73307e-06	0.00115116
ENSMUSG00000022528	0.349183	0.0348574	0.387068
ENSMUSG00000022543	0.718072	0.00886476	0.185021
ENSMUSG00000022587	-0.630605	0.000661615	0.0348017
ENSMUSG00000022595	0.533251	0.0471262	0.443943
ENSMUSG00000022615	0.551631	0.0111583	0.208289
ENSMUSG00000022621	0.481472	0.013534	0.233874
ENSMUSG00000022635	-0.421515	0.0151409	0.248705
ENSMUSG00000022636	0.682813	0.00373893	0.113225
ENSMUSG00000022657	0.52022	0.0161781	0.258891
ENSMUSG00000022659	0.783753	0.00291231	0.0970771
ENSMUSG00000022667	0.808253	9.15111e-06	0.00164901
ENSMUSG00000022676	-0.372451	0.0481823	0.446951
ENSMUSG00000022757	0.576228	0.00134745	0.0577025
ENSMUSG00000022759	0.644342	0.00218603	0.0802133
ENSMUSG00000022768	0.58511	0.0392799	0.40592
ENSMUSG00000022769	0.44738	0.0173585	0.268643
ENSMUSG00000022783	0.526631	0.0122374	0.220208
ENSMUSG00000022790	0.712773	0.00690489	0.162573
ENSMUSG00000022844	-0.354406	0.0359773	0.391151
ENSMUSG00000022861	0.454969	0.0183931	0.279428
ENSMUSG00000022876	0.379186	0.048362	0.447941
ENSMUSG00000022901	0.750197	0.000166132	0.0132035
ENSMUSG00000022938	-0.565783	0.0408817	0.414182
ENSMUSG00000022949	0.503029	0.0163231	0.260141
ENSMUSG00000022952	0.305044	0.0409403	0.414182
ENSMUSG00000023019	0.603271	0.000403329	0.0248834
ENSMUSG00000023030	0.409707	0.0303217	0.361663
ENSMUSG00000023036	0.468595	0.0327811	0.375321
ENSMUSG00000023067	-0.643852	6.0297e-05	0.00619594
ENSMUSG00000023078	1.16555	1.24131e-05	0.00198175
ENSMUSG00000023084	-0.694821	0.0067095	0.159834
ENSMUSG00000023089	-0.501144	0.00822205	0.176049
ENSMUSG00000023132	-0.867882	0.000104224	0.00934423
ENSMUSG00000023169	0.470842	0.00517044	0.138781
ENSMUSG00000023266	0.433612	0.04701	0.443307
ENSMUSG00000023274	0.66521	0.000504872	0.0287146
ENSMUSG00000023349	0.47942	0.00749498	0.168412
ENSMUSG00000023764	0.43504	0.00308092	0.0999514
ENSMUSG00000023805	0.406193	0.00695531	0.163451
ENSMUSG00000023806	0.436394	0.00656421	0.157764
ENSMUSG00000023861	-0.962983	2.85979e-05	0.00358952
ENSMUSG00000023903	1.01851	1.00761e-05	0.00176232
ENSMUSG00000023944	-0.317942	0.046412	0.440731
ENSMUSG00000023947	0.531319	0.0104979	0.202906
ENSMUSG00000023949	0.517586	0.026089	0.335562
ENSMUSG00000023951	-0.429787	0.00486732	0.132412
ENSMUSG00000023964	-0.574124	0.0286007	0.352187
ENSMUSG00000023992	1.17411	3.53844e-08	2.22068e-05
ENSMUSG00000024011	0.337432	0.0491849	0.45279
ENSMUSG00000024013	0.510262	0.0060428	0.150757
ENSMUSG00000024014	0.528748	0.00149581	0.0621897
ENSMUSG00000024030	0.352361	0.0460916	0.439707
ENSMUSG00000024033	0.630268	0.00225829	0.0820377
ENSMUSG00000024053	0.385438	0.0476108	0.446136
ENSMUSG00000024084	0.397418	0.0483629	0.447941
ENSMUSG00000024087	0.579847	0.00140317	0.0596677
ENSMUSG00000024112	0.959781	0.000608437	0.0324738
ENSMUSG00000024124	0.921006	0.000760716	0.0380358
ENSMUSG00000024175	0.45286	0.0470748	0.443687
ENSMUSG00000024206	0.429486	0.0130036	0.227804
ENSMUSG00000024290	-0.612541	0.00263039	0.0904973
ENSMUSG00000024293	-0.639055	0.00325293	0.102605
ENSMUSG00000024300	0.499177	0.00531501	0.140967
ENSMUSG00000024301	-0.554321	0.022068	0.308952
ENSMUSG00000024327	-0.412035	0.0183534	0.279291
ENSMUSG00000024349	0.51852	0.00548084	0.143311
ENSMUSG00000024353	0.57443	0.0287182	0.352361
ENSMUSG00000024397	0.758606	0.00135623	0.0579424
ENSMUSG00000024399	0.591404	0.0129583	0.227646
ENSMUSG00000024401	0.671494	0.01747	0.2696
ENSMUSG00000024479	-0.390071	0.0237031	0.319317
ENSMUSG00000024517	-0.395419	0.0378994	0.400086
ENSMUSG00000024575	0.592184	0.0118986	0.216413
ENSMUSG00000024581	-0.596726	0.033551	0.379744
ENSMUSG00000024610	0.478444	0.0165084	0.261651
ENSMUSG00000024621	0.370868	0.0113994	0.211555
ENSMUSG00000024653	-0.547949	0.00635648	0.15487
ENSMUSG00000024663	0.782032	1.88107e-05	0.002616
ENSMUSG00000024669	0.8213	0.00041933	0.0256101
ENSMUSG00000024670	0.852484	0.000143487	0.0119245
ENSMUSG00000024672	0.922539	0.000826498	0.0406548
ENSMUSG00000024679	0.78911	8.92811e-05	0.0083329
ENSMUSG00000024680	-0.701041	0.0130049	0.227804
ENSMUSG00000024691	-0.456959	0.0338823	0.381357
ENSMUSG00000024696	0.627767	0.011183	0.208536
ENSMUSG00000024737	0.490135	0.00466187	0.129734
ENSMUSG00000024742	-0.508232	0.0117422	0.215742
ENSMUSG00000024743	0.385914	0.0107304	0.20471
ENSMUSG00000024754	-0.380868	0.0190276	0.284321
ENSMUSG00000024795	-0.739837	0.00776409	0.171697
ENSMUSG00000024810	0.79372	6.01194e-05	0.00619594
ENSMUSG00000024878	-0.390129	0.0350348	0.387657
ENSMUSG00000024901	0.690856	0.00169645	0.0678579
ENSMUSG00000024937	0.350137	0.0196519	0.289373
ENSMUSG00000024943	-0.415172	0.0386102	0.402927
ENSMUSG00000024965	0.411388	0.0345159	0.384684
ENSMUSG00000024974	-0.52337	0.00474647	0.131375
ENSMUSG00000025017	0.726083	1.06904e-05	0.00181794
ENSMUSG00000025037	-0.346932	0.0435713	0.429212
ENSMUSG00000025128	0.897542	5.93927e-05	0.00619594
ENSMUSG00000025140	0.82487	0.00198728	0.0758628
ENSMUSG00000025153	0.311127	0.0410906	0.41501
ENSMUSG00000025154	0.611519	0.0187772	0.282303
ENSMUSG00000025161	0.644563	0.00206631	0.0776596
ENSMUSG00000025234	-0.896285	3.38661e-05	0.00410909
ENSMUSG00000025257	0.763686	0.00285103	0.0962685
ENSMUSG00000025279	1.00441	0.000259041	0.0177978
ENSMUSG00000025314	0.401669	0.0416371	0.417584
ENSMUSG00000025323	-0.459524	0.0332682	0.37819
ENSMUSG00000025324	0.360956	0.041844	0.41844
ENSMUSG00000025329	0.467589	0.049607	0.455293
ENSMUSG00000025348	0.409621	0.0282554	0.350166
ENSMUSG00000025354	-0.551146	0.00785913	0.1731
ENSMUSG00000025407	0.426168	0.0241911	0.32282
ENSMUSG00000025422	0.482762	0.032607	0.375321
ENSMUSG00000025429	0.451145	0.0206314	0.298002
ENSMUSG00000025453	-0.619203	1.81361e-05	0.00260829
ENSMUSG00000025461	0.803306	0.00313393	0.101005
ENSMUSG00000025473	1.12804	8.46757e-06	0.00155666
ENSMUSG00000025492	-0.415339	0.0116271	0.2144
ENSMUSG00000025602	0.42362	0.0454159	0.43784
ENSMUSG00000025648	0.769202	9.391e-05	0.00852956
ENSMUSG00000025733	0.387449	0.0258961	0.335116
ENSMUSG00000025766	-0.508116	0.0194134	0.287022
ENSMUSG00000025780	0.372004	0.0333174	0.378512
ENSMUSG00000025804	0.479616	0.0153196	0.250636
ENSMUSG00000025862	-0.402801	0.0214736	0.304769
ENSMUSG00000025894	-0.409922	0.0434935	0.428809
ENSMUSG00000025900	0.38708	0.0450509	0.436828
ENSMUSG00000025902	0.597342	0.00555666	0.144062
ENSMUSG00000025903	0.854376	0.000440423	0.026281
ENSMUSG00000025907	-0.615884	0.00126408	0.0554011
ENSMUSG00000025929	0.818501	0.000581516	NA
ENSMUSG00000025936	-0.556314	0.00769965	0.171103
ENSMUSG00000025949	0.503647	0.0171665	0.267034
ENSMUSG00000025981	-0.392019	0.0258755	0.335116
ENSMUSG00000026009	1.03335	2.55799e-05	0.00337339
ENSMUSG00000026012	0.385281	0.0321599	0.373285
ENSMUSG00000026065	0.537189	0.0204241	0.296426
ENSMUSG00000026069	0.38033	0.0400264	0.411339
ENSMUSG00000026166	0.835366	0.00305794	0.0997686
ENSMUSG00000026185	0.398715	0.0367979	0.394186
ENSMUSG00000026271	0.593942	0.00263783	0.090582
ENSMUSG00000026285	1.18433	2.88846e-05	0.00360068
ENSMUSG00000026358	0.735171	0.00948118	0.191788
ENSMUSG00000026384	-0.450611	0.0104432	0.202413
ENSMUSG00000026393	-1.71633	5.94353e-22	1.54532e-18
ENSMUSG00000026411	0.43368	0.0384783	0.402166
ENSMUSG00000026415	1.25868	8.56222e-06	0.00155832
ENSMUSG00000026417	1.16551	3.21552e-06	0.000737483
ENSMUSG00000026426	0.505305	0.0167221	0.263272
ENSMUSG00000026430	0.331937	0.044887	0.436024
ENSMUSG00000026458	0.419101	0.0479812	0.446136
ENSMUSG00000026466	0.595742	0.0322333	0.373898
ENSMUSG00000026475	0.752994	0.007985	0.173629
ENSMUSG00000026479	-0.410045	0.0106109	0.203497
ENSMUSG00000026480	0.421573	0.0283701	0.350533
ENSMUSG00000026483	0.310317	0.0378662	0.39998
ENSMUSG00000026489	0.542088	0.0249426	0.328491
ENSMUSG00000026548	0.667963	0.00216121	0.079785
ENSMUSG00000026580	0.562228	0.0178144	0.273443
ENSMUSG00000026605	-0.880603	0.00177682	0.0704536
ENSMUSG00000026610	0.4741	0.0439427	0.430904
ENSMUSG00000026622	0.585586	0.021169	0.302652
ENSMUSG00000026639	-0.322321	0.03042	0.362359
ENSMUSG00000026649	0.661427	0.00157992	0.0647623
ENSMUSG00000026656	1.07473	1.52257e-07	7.91737e-05
ENSMUSG00000026657	0.561525	0.000219516	0.0161748
ENSMUSG00000026688	-0.418788	0.0229601	0.314673
ENSMUSG00000026700	0.587965	0.0122245	NA
ENSMUSG00000026701	-0.402158	0.00735048	0.166599
ENSMUSG00000026712	0.501201	0.016122	0.258749
ENSMUSG00000026725	-0.330116	0.0409949	0.414504
ENSMUSG00000026737	0.321237	0.0400194	0.411339
ENSMUSG00000026748	0.40104	0.0233836	0.316459
ENSMUSG00000026749	0.360405	0.0321325	0.373204
ENSMUSG00000026770	0.622684	0.00396872	0.117748
ENSMUSG00000026781	-0.318825	0.0406537	0.413793
ENSMUSG00000026822	1.09509	1.14042e-05	0.00190418
ENSMUSG00000026824	0.650686	0.0218313	0.307293
ENSMUSG00000026831	0.653833	0.00113624	0.0516482
ENSMUSG00000026866	0.671065	0.00428842	0.123802
ENSMUSG00000026922	0.541892	0.000905569	0.0437171
ENSMUSG00000026941	-0.806428	0.00331886	0.104144
ENSMUSG00000026956	-0.381527	0.0390425	0.404194
ENSMUSG00000026961	-0.390345	0.0378072	0.399821
ENSMUSG00000026971	-0.464095	0.00318023	0.101723
ENSMUSG00000026980	0.460784	0.0138577	0.23761
ENSMUSG00000027009	0.416318	0.0154391	0.250886
ENSMUSG00000027011	-0.415348	0.013934	0.238568
ENSMUSG00000027068	0.625866	0.00322914	0.102387
ENSMUSG00000027073	0.639452	0.0129715	0.227658
ENSMUSG00000027088	-0.451768	0.0263211	0.337117
ENSMUSG00000027173	-0.510172	0.0336567	0.380383
ENSMUSG00000027193	-0.373059	0.0198842	0.291145
ENSMUSG00000027195	-0.452524	0.0375814	0.398823
ENSMUSG00000027305	-0.401993	0.0182176	0.277851
ENSMUSG00000027322	0.722609	0.000895075	0.043441
ENSMUSG00000027339	0.350245	0.027384	0.344528
ENSMUSG00000027340	0.350046	0.0343834	0.384219
ENSMUSG00000027347	0.536576	0.00250317	0.0877799
ENSMUSG00000027359	0.792706	0.00518627	0.138781
ENSMUSG00000027364	-0.965155	0.000246946	0.0174848
ENSMUSG00000027365	-0.455234	0.0291517	0.354416
ENSMUSG00000027368	0.617603	0.0166349	0.262125
ENSMUSG00000027381	-0.50113	0.00244355	0.0866912
ENSMUSG00000027398	0.41447	0.0479907	0.446136
ENSMUSG00000027427	0.384274	0.0405228	0.413637
ENSMUSG00000027485	0.530595	0.0180274	0.275714
ENSMUSG00000027490	-0.398452	0.0433949	0.42823
ENSMUSG00000027514	0.627397	0.0036277	0.111114
ENSMUSG00000027544	0.634469	0.000463851	0.027145
ENSMUSG00000027550	-0.791709	0.000289912	0.0192184
ENSMUSG00000027555	0.481747	0.0223427	0.311198
ENSMUSG00000027630	0.526093	0.0214166	0.304518
ENSMUSG00000027699	-0.44829	0.0389778	0.404002
ENSMUSG00000027712	-0.377225	0.00905963	0.187158
ENSMUSG00000027714	-0.352911	0.0288157	0.352687
ENSMUSG00000027746	-0.415117	0.0334362	0.379131
ENSMUSG00000027765	-0.475689	0.00764895	0.17093
ENSMUSG00000027822	-0.551955	0.0159168	0.256151
ENSMUSG00000027843	0.532343	0.0108142	0.205663
ENSMUSG00000027845	-0.491976	0.0073452	0.166599
ENSMUSG00000027857	-0.549316	0.0130973	0.228983
ENSMUSG00000027867	0.45198	0.032834	0.375321
ENSMUSG00000027977	-0.755375	0.00688145	NA
ENSMUSG00000028001	0.485605	0.0379555	NA
ENSMUSG00000028028	0.357144	0.0474379	0.445955
ENSMUSG00000028031	0.552348	0.0391629	0.40521
ENSMUSG00000028064	0.532186	0.00462368	0.129331
ENSMUSG00000028068	-0.730515	0.00921773	0.188717
ENSMUSG00000028071	0.792606	0.000237246	0.017025
ENSMUSG00000028101	0.3873	0.0325124	0.375321
ENSMUSG00000028111	0.772101	0.00109382	0.0501448
ENSMUSG00000028159	0.340851	0.0309743	0.367252
ENSMUSG00000028186	0.679553	0.0165428	0.261787
ENSMUSG00000028195	0.463189	0.0453359	0.43784
ENSMUSG00000028214	-0.409607	0.00825193	0.176234
ENSMUSG00000028232	-0.357413	0.0314448	0.368985
ENSMUSG00000028238	0.547132	0.0129516	0.227646
ENSMUSG00000028282	-0.624404	0.00544062	0.14294
ENSMUSG00000028294	0.543812	0.00727881	0.165658
ENSMUSG00000028312	-0.443862	0.0259812	0.335319
ENSMUSG00000028337	0.561036	0.000730947	0.0375798
ENSMUSG00000028360	0.561653	0.0368188	NA
ENSMUSG00000028362	0.787305	0.00144717	0.0611102
ENSMUSG00000028367	-0.370225	0.0310115	0.367405
ENSMUSG00000028389	-0.637494	0.00584747	0.148947
ENSMUSG00000028416	-0.285581	0.047968	0.446136
ENSMUSG00000028420	-0.566074	0.001474	0.0618131
ENSMUSG00000028435	0.955033	0.00075261	0.0379724
ENSMUSG00000028437	0.410255	0.0189555	0.284177
ENSMUSG00000028444	-0.586209	0.00969173	0.194261
ENSMUSG00000028459	0.561474	0.00447001	0.127315
ENSMUSG00000028525	0.775582	0.00118436	0.053355
ENSMUSG00000028555	0.385342	0.0360196	0.391377
ENSMUSG00000028565	-0.339455	0.0442268	0.431989
ENSMUSG00000028581	0.753035	4.35573e-06	0.000966759
ENSMUSG00000028583	-0.317828	0.0276569	0.346425
ENSMUSG00000028599	0.584491	0.000921598	0.0442562
ENSMUSG00000028613	0.651255	0.017618	0.271506
ENSMUSG00000028634	0.425475	0.00851973	0.178846
ENSMUSG00000028637	0.439219	0.0312083	0.368031
ENSMUSG00000028693	-0.352953	0.0272441	0.344096
ENSMUSG00000028702	-1.17048	2.85466e-05	0.00358952
ENSMUSG00000028708	0.296239	0.0463103	0.440129
ENSMUSG00000028713	-0.563537	0.000576927	0.0315317
ENSMUSG00000028730	0.501974	0.0204553	0.296643
ENSMUSG00000028782	0.548215	0.0318915	0.371591
ENSMUSG00000028801	0.726847	0.0028758	0.0964938
ENSMUSG00000028832	-0.683246	0.000233259	0.0169412
ENSMUSG00000028874	0.697157	0.000324662	0.0208596
ENSMUSG00000028879	-0.378989	0.0354217	0.389061
ENSMUSG00000028885	1.0198	7.17875e-07	0.000239346
ENSMUSG00000028914	0.411013	0.00935645	0.190053
ENSMUSG00000028931	0.421801	0.0232609	0.316266
ENSMUSG00000028933	-0.36257	0.0343687	0.384219
ENSMUSG00000028957	0.563327	0.00165489	0.0667826
ENSMUSG00000028967	-0.409335	0.00850108	0.178846
ENSMUSG00000028996	-0.782398	0.00581534	0.148651
ENSMUSG00000029005	0.726292	0.00532901	0.140971
ENSMUSG00000029026	0.658277	0.00110844	0.0506877
ENSMUSG00000029086	0.568465	0.0212887	0.303276
ENSMUSG00000029120	-1.01571	7.85944e-06	0.00147466
ENSMUSG00000029121	0.795439	0.00477393	0.131634
ENSMUSG00000029126	-0.305004	0.0441509	0.431782
ENSMUSG00000029155	0.447407	0.0148198	0.246096
ENSMUSG00000029165	0.375928	0.0189262	0.283971
ENSMUSG00000029217	0.443576	0.0174276	0.269255
ENSMUSG00000029273	0.684128	0.0141447	0.240368
ENSMUSG00000029275	0.667068	0.0180262	0.275714
ENSMUSG00000029304	0.53732	0.00405	0.118696
ENSMUSG00000029309	-0.349163	0.0377268	0.399452
ENSMUSG00000029322	-0.409825	0.0232928	0.316266
ENSMUSG00000029334	-0.393044	0.0328443	0.375321
ENSMUSG00000029380	0.954781	0.000184384	0.0144025
ENSMUSG00000029397	-0.40075	0.0365983	0.393288
ENSMUSG00000029413	0.368485	0.0326734	0.375321
ENSMUSG00000029417	2.42861	1.30208e-19	2.6331e-16
ENSMUSG00000029442	0.382231	0.0461634	0.439707
ENSMUSG00000029484	-0.365893	0.0131231	0.229165
ENSMUSG00000029490	0.371422	0.0478061	0.446136
ENSMUSG00000029510	-0.721504	0.0105284	0.202906
ENSMUSG00000029516	0.489286	0.0304223	0.362359
ENSMUSG00000029522	-0.566759	0.00985246	0.196187
ENSMUSG00000029530	0.688757	0.00803673	0.173922
ENSMUSG00000029553	0.570927	0.010312	0.201156
ENSMUSG00000029563	-0.649607	0.00154385	0.0635703
ENSMUSG00000029581	0.329513	0.0464454	0.440731
ENSMUSG00000029603	0.40352	0.0376437	0.399019
ENSMUSG00000029622	0.394416	0.015932	0.256151
ENSMUSG00000029641	-0.437885	0.035857	0.39031
ENSMUSG00000029647	0.406035	0.0477765	0.446136
ENSMUSG00000029650	0.469203	0.0389851	0.404002
ENSMUSG00000029660	0.44755	0.0435816	0.429212
ENSMUSG00000029669	-0.315531	0.0325544	0.375321
ENSMUSG00000029675	-0.346752	0.033076	0.377182
ENSMUSG00000029720	0.736054	0.000185828	0.0144269
ENSMUSG00000029771	0.707283	1.83591e-05	0.00260829
ENSMUSG00000029778	0.531425	0.0281085	0.349252
ENSMUSG00000029811	0.778682	0.00610299	0.151067
ENSMUSG00000029816	0.524555	0.00591697	0.148947
ENSMUSG00000029822	0.364818	0.04223	0.420913
ENSMUSG00000029836	-0.643614	0.000494756	0.0283162
ENSMUSG00000029851	-0.354837	0.0222391	0.310392
ENSMUSG00000029875	-0.490695	0.0484327	0.44836
ENSMUSG00000029919	0.76443	0.00306903	0.0998241
ENSMUSG00000029925	0.968204	1.31205e-06	0.000367375
ENSMUSG00000029998	-0.763286	0.00607632	0.151067
ENSMUSG00000030016	-0.445338	0.0334552	0.379131
ENSMUSG00000030022	-0.441355	0.0338427	0.381357
ENSMUSG00000030042	-0.762605	0.000237602	0.017025
ENSMUSG00000030043	0.704558	0.0082985	0.176234
ENSMUSG00000030057	-0.477751	0.0235728	0.318031
ENSMUSG00000030059	-0.319388	0.0459357	0.438886
ENSMUSG00000030074	0.588274	0.00722648	0.165424
ENSMUSG00000030077	1.53001	5.87608e-08	3.44983e-05
ENSMUSG00000030088	-0.397149	0.0266457	0.339601
ENSMUSG00000030093	-0.36459	0.0388738	0.403366
ENSMUSG00000030103	0.54993	0.00334239	0.104701
ENSMUSG00000030124	0.671522	0.00657888	0.157764
ENSMUSG00000030144	0.796925	0.000461313	0.027145
ENSMUSG00000030148	0.545169	0.00418222	0.121771
ENSMUSG00000030157	-0.470504	0.003712	0.112597
ENSMUSG00000030188	-0.448473	0.0229484	0.314673
ENSMUSG00000030214	0.720652	0.000152833	0.0125456
ENSMUSG00000030218	-0.500695	0.00101287	0.0479107
ENSMUSG00000030220	0.449445	0.0144983	0.243197
ENSMUSG00000030223	0.604528	0.00597936	0.15004
ENSMUSG00000030256	0.539275	0.00304317	0.0997686
ENSMUSG00000030257	0.56454	0.00403996	0.118592
ENSMUSG00000030263	0.55281	0.00906046	0.187158
ENSMUSG00000030269	0.321746	0.0289887	0.353879
ENSMUSG00000030329	0.365892	0.0431158	0.426703
ENSMUSG00000030397	0.409491	0.0386834	0.403164
ENSMUSG00000030402	0.447631	0.0356913	NA
ENSMUSG00000030413	0.732613	0.00624934	0.153079
ENSMUSG00000030468	0.845284	0.000387003	0.0240391
ENSMUSG00000030474	0.49878	0.0317925	0.371151
ENSMUSG00000030512	-0.363394	0.0381603	0.401223
ENSMUSG00000030519	0.665873	0.0165703	0.261787
ENSMUSG00000030521	-0.39063	0.0469836	0.443307
ENSMUSG00000030539	0.411804	0.0325426	0.375321
ENSMUSG00000030551	-0.645544	0.0020695	0.0776596
ENSMUSG00000030577	0.639353	0.000546339	0.0302358
ENSMUSG00000030592	0.755676	0.00229566	0.0827347
ENSMUSG00000030630	-0.299211	0.047834	0.446136
ENSMUSG00000030638	0.567261	0.0457588	0.438603
ENSMUSG00000030650	0.402611	0.0363952	0.392863
ENSMUSG00000030651	0.595188	0.0311274	NA
ENSMUSG00000030657	0.546724	0.00124424	0.0551915
ENSMUSG00000030711	-0.414073	0.0290261	0.353879
ENSMUSG00000030729	-0.724989	0.00429225	0.123802
ENSMUSG00000030737	0.405016	0.0273713	0.344528
ENSMUSG00000030747	0.494242	0.0206682	0.298068
ENSMUSG00000030753	-0.585731	0.0103543	0.201548
ENSMUSG00000030761	0.359412	0.0319878	0.372254
ENSMUSG00000030789	0.739089	0.000128715	0.0108959
ENSMUSG00000030800	0.390252	0.0170613	0.26669
ENSMUSG00000030830	0.488007	0.00243097	0.0865824
ENSMUSG00000030854	1.00351	2.67945e-06	0.000650213
ENSMUSG00000030889	0.447941	0.0488586	0.45047
ENSMUSG00000030905	-0.420435	0.0199533	0.291687
ENSMUSG00000030956	0.478473	0.0130925	0.228983
ENSMUSG00000030960	0.874671	4.91922e-06	0.00105329
ENSMUSG00000031022	0.46268	0.02651	0.338822
ENSMUSG00000031089	-0.380284	0.0310679	0.367405
ENSMUSG00000031101	0.476866	0.00925147	0.188975
ENSMUSG00000031103	0.350553	0.0357324	0.389899
ENSMUSG00000031165	0.51763	0.00446808	0.127315
ENSMUSG00000031196	-0.445938	0.0370669	0.39567
ENSMUSG00000031214	-0.360444	0.01777	0.273384
ENSMUSG00000031229	-0.525097	0.0190789	0.284605
ENSMUSG00000031232	-0.357166	0.045795	0.438603
ENSMUSG00000031245	-0.531576	0.00874268	0.182683
ENSMUSG00000031246	-0.6628	0.000331393	0.0211626
ENSMUSG00000031264	0.529567	0.00610057	0.151067
ENSMUSG00000031389	0.458996	0.0147723	0.245726
ENSMUSG00000031391	0.310704	0.0453471	0.43784
ENSMUSG00000031431	-0.813999	8.92495e-07	0.000275312
ENSMUSG00000031438	0.431381	0.0392984	0.40592
ENSMUSG00000031444	1.03686	3.7867e-05	0.00444632
ENSMUSG00000031445	0.995874	0.000196039	0.0148046
ENSMUSG00000031448	0.56864	0.041701	0.417899
ENSMUSG00000031494	0.785086	0.000221573	0.0162606
ENSMUSG00000031506	1.04447	6.54212e-07	0.000228668
ENSMUSG00000031548	0.494431	0.0174796	0.2696
ENSMUSG00000031592	-0.525098	0.00964235	0.194127
ENSMUSG00000031596	0.790178	0.000409327	0.0251681
ENSMUSG00000031608	0.508281	0.00363975	0.111147
ENSMUSG00000031613	-0.718371	5.06949e-05	0.00560312
ENSMUSG00000031626	0.447635	0.0397837	0.40977
ENSMUSG00000031654	0.652291	0.00339787	NA
ENSMUSG00000031662	0.579554	0.00219472	0.0802162
ENSMUSG00000031697	-0.40912	0.0192499	0.285999
ENSMUSG00000031706	0.450174	0.0118891	0.216413
ENSMUSG00000031709	1.00851	1.78928e-07	8.6822e-05
ENSMUSG00000031737	0.410467	0.0100645	0.198855
ENSMUSG00000031778	-0.468771	0.00684025	0.161522
ENSMUSG00000031779	1.09467	2.59492e-05	0.00337339
ENSMUSG00000031780	0.848547	0.00149518	0.0621897
ENSMUSG00000031803	0.621325	0.00478077	0.131634
ENSMUSG00000031805	0.448088	0.00732162	0.166359
ENSMUSG00000031818	-0.594849	0.000586303	0.0318174
ENSMUSG00000031821	-0.494706	0.042658	0.423555
ENSMUSG00000031822	0.569378	0.00552922	0.14376
ENSMUSG00000031827	0.422678	0.0184432	0.279722
ENSMUSG00000031831	0.550562	0.0126276	0.224217
ENSMUSG00000031833	0.336292	0.0267649	0.340169
ENSMUSG00000031841	-0.358486	0.0227628	0.313614
ENSMUSG00000031880	0.554302	0.0110177	0.20715
ENSMUSG00000031881	-0.769941	0.000194269	0.0147746
ENSMUSG00000031893	0.522572	0.03564	0.389872
ENSMUSG00000031903	0.34255	0.0408444	0.414182
ENSMUSG00000031906	0.470462	0.0153536	0.250636
ENSMUSG00000031910	0.870235	0.00153849	0.0634933
ENSMUSG00000031950	-0.346307	0.0165185	0.261651
ENSMUSG00000031966	-0.5361	0.0464957	0.440731
ENSMUSG00000031970	0.983241	0.000147415	0.0121952
ENSMUSG00000032010	0.791009	0.000194418	0.0147746
ENSMUSG00000032011	0.688079	0.00109234	0.0501448
ENSMUSG00000032013	0.857823	0.000597951	0.0321024
ENSMUSG00000032014	0.459641	0.0178573	0.273572
ENSMUSG00000032015	-0.603571	0.0334484	0.379131
ENSMUSG00000032020	0.351928	0.0368686	0.394302
ENSMUSG00000032023	0.569435	0.0162543	0.259499
ENSMUSG00000032024	0.431643	0.0172906	0.267952
ENSMUSG00000032053	0.605423	0.00828385	0.176234
ENSMUSG00000032059	0.308799	0.0461692	0.439707
ENSMUSG00000032093	0.600492	0.0102877	0.200897
ENSMUSG00000032122	0.480326	0.0408966	0.414182
ENSMUSG00000032172	-0.776642	0.00108677	0.0501448
ENSMUSG00000032185	0.80277	2.71957e-05	0.00348565
ENSMUSG00000032186	0.596794	0.00632969	0.154424
ENSMUSG00000032215	-0.441385	0.0423771	0.421455
ENSMUSG00000032238	-0.508401	0.0340794	0.382545
ENSMUSG00000032253	-0.549694	0.00788869	0.17319
ENSMUSG00000032258	0.464532	0.0109155	0.2061
ENSMUSG00000032280	0.40947	0.00812455	0.174783
ENSMUSG00000032281	0.668918	0.0183371	0.279277
ENSMUSG00000032322	0.489978	0.0360415	0.391382
ENSMUSG00000032332	-0.656452	6.17709e-05	0.00624572
ENSMUSG00000032350	0.479497	0.0042238	0.122215
ENSMUSG00000032409	-0.396436	0.0479316	0.446136
ENSMUSG00000032412	-0.315402	0.0377961	0.399821
ENSMUSG00000032436	0.506311	0.0171904	0.267178
ENSMUSG00000032440	-0.661319	0.000802301	0.0397872
ENSMUSG00000032484	0.514637	0.0287223	0.352361
ENSMUSG00000032511	0.630862	0.0228213	0.313941
ENSMUSG00000032514	0.474165	0.010766	0.205175
ENSMUSG00000032561	0.705135	0.00056589	0.0311154
ENSMUSG00000032577	0.39619	0.0198513	0.291132
ENSMUSG00000032589	0.612101	0.0139541	0.238689
ENSMUSG00000032591	1.04263	0.000240517	0.0171663
ENSMUSG00000032595	0.835953	0.000211644	0.0157866
ENSMUSG00000032621	-0.603417	0.00841143	0.177799
ENSMUSG00000032688	0.608188	0.000587397	0.0318174
ENSMUSG00000032691	0.629819	0.00354404	0.108772
ENSMUSG00000032735	-0.303936	0.0481521	0.446898
ENSMUSG00000032757	-0.297739	0.0392699	0.40592
ENSMUSG00000032788	0.33676	0.0281241	0.349252
ENSMUSG00000032816	0.614247	0.016347	0.260293
ENSMUSG00000032826	0.577726	0.015579	0.252482
ENSMUSG00000032860	0.797193	0.00249903	0.0877799
ENSMUSG00000032878	-0.429333	0.0440465	0.431456
ENSMUSG00000033016	0.322883	0.0259965	0.335319
ENSMUSG00000033082	-0.561184	0.015082	0.248635
ENSMUSG00000033192	0.472354	0.0141193	0.240368
ENSMUSG00000033213	0.68339	0.0118884	0.216413
ENSMUSG00000033220	0.438407	0.0425211	0.422426
ENSMUSG00000033295	0.39183	0.00661518	0.158208
ENSMUSG00000033350	-0.608099	0.0144956	0.243197
ENSMUSG00000033417	0.489263	0.049092	0.452163
ENSMUSG00000033453	-0.386519	0.0135441	0.233874
ENSMUSG00000033460	-0.303108	0.04492	0.436024
ENSMUSG00000033697	0.339938	0.0430787	0.426595
ENSMUSG00000033717	0.541922	0.0399104	0.410783
ENSMUSG00000033731	0.567023	0.0331848	0.377949
ENSMUSG00000033777	0.567333	0.00183962	0.0721574
ENSMUSG00000033788	-0.335793	0.0254877	0.332209
ENSMUSG00000033849	0.650409	0.0164371	0.261284
ENSMUSG00000033852	0.547031	0.0446688	0.434977
ENSMUSG00000033855	-0.506415	0.00297427	0.0984213
ENSMUSG00000033964	-0.441886	0.0198412	0.291132
ENSMUSG00000033966	0.582167	0.00329589	0.10378
ENSMUSG00000034035	0.451548	0.0408656	0.414182
ENSMUSG00000034041	0.382492	0.0307569	0.365519
ENSMUSG00000034116	0.515257	0.0105506	0.202906
ENSMUSG00000034127	-0.514196	0.000523268	0.029576
ENSMUSG00000034227	0.85661	4.25484e-07	0.000168344
ENSMUSG00000034245	0.492001	0.0358319	0.39031
ENSMUSG00000034271	-0.360791	0.0208844	0.300234
ENSMUSG00000034310	-0.352958	0.0184643	0.279809
ENSMUSG00000034330	0.461674	0.0141681	0.24054
ENSMUSG00000034342	0.868914	0.000325502	0.0208596
ENSMUSG00000034349	-0.598012	0.00459992	0.129331
ENSMUSG00000034353	0.470592	0.0109165	0.2061
ENSMUSG00000034361	0.504715	0.00588619	0.148947
ENSMUSG00000034394	0.455551	0.0387564	0.403297
ENSMUSG00000034403	-0.435318	0.0291374	0.354416
ENSMUSG00000034460	0.346269	0.0419128	0.418668
ENSMUSG00000034463	0.5136	0.00928705	0.189489
ENSMUSG00000034488	-0.462627	0.0065353	0.157718
ENSMUSG00000034579	0.598508	0.0252348	NA
ENSMUSG00000034607	-0.437992	0.0178202	0.273443
ENSMUSG00000034652	0.711043	0.000720359	0.0373155
ENSMUSG00000034675	0.339626	0.0453166	0.43784
ENSMUSG00000034723	-0.4453	0.0244662	0.325025
ENSMUSG00000034744	0.516527	0.00991852	0.197071
ENSMUSG00000034786	-0.877483	6.65903e-07	0.000228668
ENSMUSG00000034792	0.978391	2.96614e-08	1.9994e-05
ENSMUSG00000034845	-0.417124	0.021633	0.305992
ENSMUSG00000034854	0.430225	0.00599751	0.15004
ENSMUSG00000034855	1.35622	8.85633e-07	0.000275312
ENSMUSG00000035004	0.513567	0.00600159	0.15004
ENSMUSG00000035032	0.487715	0.0387309	0.403262
ENSMUSG00000035064	0.331772	0.0316899	0.37019
ENSMUSG00000035133	-0.914493	4.94575e-05	0.00559085
ENSMUSG00000035165	0.631053	0.0212485	0.30325
ENSMUSG00000035171	-0.315561	0.0388665	0.403366
ENSMUSG00000035186	1.21684	6.20745e-06	0.00121479
ENSMUSG00000035202	0.635135	0.0146291	0.244914
ENSMUSG00000035236	-0.560725	0.0377285	0.399452
ENSMUSG00000035246	0.499808	0.0305483	0.363622
ENSMUSG00000035273	0.504196	0.0268829	0.34143
ENSMUSG00000035295	0.517272	0.0367528	0.393935
ENSMUSG00000035305	0.403253	0.0186216	0.281533
ENSMUSG00000035356	0.796527	3.58989e-05	0.00429843
ENSMUSG00000035486	0.857278	0.00124965	0.0551915
ENSMUSG00000035509	0.648652	0.0133369	0.231698
ENSMUSG00000035528	0.628995	0.00426619	NA
ENSMUSG00000035539	0.588695	0.0111269	0.208289
ENSMUSG00000035578	0.63106	0.000462637	0.027145
ENSMUSG00000035673	0.347953	0.0294549	0.35691
ENSMUSG00000035692	-0.547918	0.0058403	0.148947
ENSMUSG00000035711	0.55881	0.00894497	0.186055
ENSMUSG00000035818	0.771147	0.00604812	0.150757
ENSMUSG00000035860	0.660976	0.00368224	0.111881
ENSMUSG00000035932	-0.791354	0.00037017	0.0232313
ENSMUSG00000035984	0.450668	0.0350913	0.387657
ENSMUSG00000036019	0.434179	0.0473577	0.445662
ENSMUSG00000036098	-0.362343	0.0266401	0.339601
ENSMUSG00000036160	-0.553041	0.00452863	0.128382
ENSMUSG00000036196	0.721526	0.00779446	NA
ENSMUSG00000036202	-0.431482	0.0218789	0.307511
ENSMUSG00000036246	0.470188	0.0119905	0.217358
ENSMUSG00000036305	-0.504816	0.0075792	0.169879
ENSMUSG00000036322	0.674736	0.00166973	0.0670839
ENSMUSG00000036323	0.439292	0.0253641	0.331362
ENSMUSG00000036362	0.488478	0.0148557	0.246342
ENSMUSG00000036395	-0.424226	0.0479964	0.446136
ENSMUSG00000036437	0.479366	0.00255901	0.0892223
ENSMUSG00000036526	0.625162	0.000313271	0.0203626
ENSMUSG00000036572	-0.380974	0.0325586	0.375321
ENSMUSG00000036587	0.800308	0.0048295	0.132375
ENSMUSG00000036594	0.500416	0.0253657	0.331362
ENSMUSG00000036634	0.613985	0.011924	0.216413
ENSMUSG00000036639	-0.614025	0.0115871	0.213879
ENSMUSG00000036805	0.573239	0.0190935	0.284605
ENSMUSG00000036814	1.0927	1.33326e-05	0.00207397
ENSMUSG00000036833	0.374778	0.0230919	0.315496
ENSMUSG00000036875	0.524378	0.00336016	0.104945
ENSMUSG00000036887	0.737934	0.000426792	0.0257206
ENSMUSG00000036896	0.926699	8.39946e-07	0.000271569
ENSMUSG00000036905	0.834107	4.23613e-05	0.00487959
ENSMUSG00000036908	0.433688	0.0165104	0.261651
ENSMUSG00000036960	0.467132	0.043691	NA
ENSMUSG00000036962	0.509038	0.0332628	0.37819
ENSMUSG00000037072	-0.277632	0.0486564	0.44906
ENSMUSG00000037095	1.22017	1.70724e-07	8.63102e-05
ENSMUSG00000037101	0.524317	0.0249535	0.328491
ENSMUSG00000037143	0.650579	0.00261396	0.0902734
ENSMUSG00000037157	0.485662	0.0477557	0.446136
ENSMUSG00000037202	-0.497072	0.0122445	0.220208
ENSMUSG00000037236	-0.573842	0.00512073	0.137866
ENSMUSG00000037254	-0.631265	0.004655	0.129734
ENSMUSG00000037337	0.61948	0.0054962	0.143311
ENSMUSG00000037348	-0.35872	0.048524	0.448907
ENSMUSG00000037370	0.525787	0.00917532	0.188477
ENSMUSG00000037440	0.750707	0.00211576	0.0782658
ENSMUSG00000037447	0.405252	0.0226005	0.312322
ENSMUSG00000037509	0.585669	0.00313228	0.101005
ENSMUSG00000037548	0.812523	1.42414e-05	0.00219091
ENSMUSG00000037579	0.658163	0.00530445	0.140943
ENSMUSG00000037610	0.504454	0.00787511	0.1731
ENSMUSG00000037613	0.591806	0.0167662	0.263738
ENSMUSG00000037640	0.51073	0.0419093	0.418668
ENSMUSG00000037649	0.475661	0.0141896	0.24068
ENSMUSG00000037664	-0.457021	0.00913055	0.187982
ENSMUSG00000037683	0.487603	0.0380915	0.400731
ENSMUSG00000037685	0.59276	0.00286956	0.0964938
ENSMUSG00000037692	-0.67938	0.00851621	0.178846
ENSMUSG00000037716	0.665941	0.0154059	0.250886
ENSMUSG00000037725	-0.554192	0.0298662	0.359
ENSMUSG00000037731	0.517103	0.00722253	0.165424
ENSMUSG00000037762	-0.451879	0.00460665	0.129331
ENSMUSG00000037795	0.511953	0.0293256	0.355818
ENSMUSG00000037801	0.622723	0.0259708	0.335319
ENSMUSG00000037845	0.552364	0.00684248	0.161522
ENSMUSG00000037846	-0.361824	0.0267057	0.339891
ENSMUSG00000037855	-0.419632	0.0183742	0.279373
ENSMUSG00000037860	0.550117	0.00591023	0.148947
ENSMUSG00000037868	0.833143	8.59231e-05	0.00819831
ENSMUSG00000037902	0.73278	8.80153e-05	0.0083329
ENSMUSG00000037907	0.480109	0.0314428	0.368985
ENSMUSG00000037935	-0.397057	0.040682	0.413793
ENSMUSG00000037949	-0.306074	0.0456017	0.438367
ENSMUSG00000037995	0.522365	0.0257681	0.334746
ENSMUSG00000038011	0.590141	0.000648097	0.0342989
ENSMUSG00000038034	0.468513	0.0140985	0.240368
ENSMUSG00000038037	0.603219	0.0101449	0.199426
ENSMUSG00000038039	-0.329622	0.0486	0.448907
ENSMUSG00000038060	0.465943	0.0151551	0.248713
ENSMUSG00000038074	-0.508092	0.0217489	0.306608
ENSMUSG00000038079	-0.37434	0.0100737	0.198855
ENSMUSG00000038112	0.94241	0.000811754	0.0401465
ENSMUSG00000038147	0.682728	0.000449185	0.0267162
ENSMUSG00000038155	-0.556537	0.0246276	0.326309
ENSMUSG00000038179	0.716219	0.000721706	0.0373155
ENSMUSG00000038180	0.569988	0.0075526	NA
ENSMUSG00000038259	0.5203	0.0405018	0.413637
ENSMUSG00000038346	0.398895	0.0493483	0.45355
ENSMUSG00000038352	0.475668	0.0361285	0.39156
ENSMUSG00000038370	0.517137	0.0193952	0.287022
ENSMUSG00000038384	0.33628	0.0498876	0.456717
ENSMUSG00000038402	0.334278	0.0315175	0.369551
ENSMUSG00000038418	0.643263	0.0207391	0.298853
ENSMUSG00000038453	0.437747	0.018574	0.281237
ENSMUSG00000038489	-0.394586	0.0294074	0.356572
ENSMUSG00000038522	0.594013	0.0302294	0.361266
ENSMUSG00000038535	-0.607813	0.00703134	0.163451
ENSMUSG00000038543	-0.453202	0.0029232	0.0970844
ENSMUSG00000038608	0.361169	0.0230962	0.315496
ENSMUSG00000038642	1.02994	3.83717e-06	0.000862178
ENSMUSG00000038677	0.523578	0.0278586	0.348232
ENSMUSG00000038683	-0.49986	0.0217232	0.306482
ENSMUSG00000038690	-0.433926	0.0386612	0.403164
ENSMUSG00000038722	-0.355341	0.0210341	0.301351
ENSMUSG00000038756	0.665679	0.00493124	0.133753
ENSMUSG00000038797	0.743719	0.00706205	0.163732
ENSMUSG00000038801	-0.820048	0.00124692	0.0551915
ENSMUSG00000038843	0.530228	0.00321932	0.102254
ENSMUSG00000038903	-0.348117	0.0354973	0.389332
ENSMUSG00000038910	0.394285	0.0356668	0.389872
ENSMUSG00000038987	0.504501	0.0369638	0.394801
ENSMUSG00000039084	0.830081	0.000181567	0.0142436
ENSMUSG00000039096	0.560969	0.00617036	0.152375
ENSMUSG00000039099	0.573696	0.0223652	0.311198
ENSMUSG00000039103	-0.57032	0.00458101	0.129263
ENSMUSG00000039116	-0.413378	0.0418071	0.418301
ENSMUSG00000039126	0.51574	0.00557845	0.144216
ENSMUSG00000039145	0.707802	1.06458e-06	0.000307545
ENSMUSG00000039153	0.476503	0.00858631	0.180036
ENSMUSG00000039158	0.448837	0.0117828	0.215742
ENSMUSG00000039168	-0.458437	0.0301951	0.361266
ENSMUSG00000039187	-0.548915	0.0311308	0.367748
ENSMUSG00000039193	0.517786	0.0131329	0.229165
ENSMUSG00000039208	0.518739	0.00399716	0.118164
ENSMUSG00000039218	0.511896	0.00848477	0.17873
ENSMUSG00000039219	-0.688387	0.00185812	0.0724151
ENSMUSG00000039221	-0.489807	0.00414976	0.121229
ENSMUSG00000039238	0.629296	0.00657928	0.157764
ENSMUSG00000039285	0.631435	9.42001e-05	0.00852956
ENSMUSG00000039372	0.631472	0.00302274	0.0996627
ENSMUSG00000039382	-0.363917	0.0171134	0.26669
ENSMUSG00000039391	0.672801	0.00462961	0.129331
ENSMUSG00000039521	1.11188	5.95051e-05	0.00619594
ENSMUSG00000039543	0.526058	0.011483	0.212605
ENSMUSG00000039552	0.382838	0.0407625	0.414182
ENSMUSG00000039601	-0.394978	0.0120326	0.217519
ENSMUSG00000039629	0.643245	0.00588972	0.148947
ENSMUSG00000039630	-0.301663	0.046735	0.442004
ENSMUSG00000039720	0.613878	0.030324	0.361663
ENSMUSG00000039738	0.401706	0.0365465	0.393288
ENSMUSG00000039760	-0.670768	0.00344691	0.106957
ENSMUSG00000039783	0.715347	0.000712182	0.0370335
ENSMUSG00000039795	-0.423002	0.0219223	0.307859
ENSMUSG00000039804	0.438732	0.0469089	0.443042
ENSMUSG00000039809	0.402256	0.032376	NA
ENSMUSG00000039853	0.398385	0.0106538	0.203891
ENSMUSG00000039899	0.409394	0.0188637	0.283267
ENSMUSG00000039936	0.516976	0.00728167	0.165658
ENSMUSG00000039942	0.459758	0.0127138	0.225528
ENSMUSG00000039956	0.733083	0.00963718	0.194127
ENSMUSG00000039967	-0.516362	0.0143287	0.242138
ENSMUSG00000039981	0.453073	0.033861	0.381357
ENSMUSG00000040003	0.704664	0.00703199	0.163451
ENSMUSG00000040010	0.656135	0.000915013	0.0440562
ENSMUSG00000040026	1.43414	9.06835e-08	5.15763e-05
ENSMUSG00000040061	0.56898	0.0013037	0.0563943
ENSMUSG00000040093	0.758761	0.000249783	0.0174848
ENSMUSG00000040123	-0.463075	0.0259926	0.335319
ENSMUSG00000040165	0.545357	0.0448536	0.436024
ENSMUSG00000040181	-0.307523	0.0437522	0.42973
ENSMUSG00000040229	0.608073	0.00586641	0.148947
ENSMUSG00000040242	-0.665246	0.00654271	0.157718
ENSMUSG00000040247	0.528342	0.019235	0.285999
ENSMUSG00000040276	0.563097	0.0474184	0.445955
ENSMUSG00000040283	0.560556	0.0229953	0.314835
ENSMUSG00000040289	-0.337618	0.0464962	0.440731
ENSMUSG00000040329	0.47798	0.0209892	0.301265
ENSMUSG00000040345	0.531793	0.00562032	0.145092
ENSMUSG00000040350	0.717514	0.000753189	0.0379724
ENSMUSG00000040483	-0.40017	0.00972014	0.194403
ENSMUSG00000040489	0.489728	0.0155567	NA
ENSMUSG00000040522	0.710763	0.00269715	0.092127
ENSMUSG00000040528	0.551818	0.0122435	0.220208
ENSMUSG00000040552	0.717852	0.00274825	0.0933174
ENSMUSG00000040613	0.591771	0.00197273	0.0755867
ENSMUSG00000040640	-0.395664	0.0345724	0.384852
ENSMUSG00000040659	0.470855	0.00542638	0.142923
ENSMUSG00000040703	0.404179	0.0103664	0.201569
ENSMUSG00000040711	0.471721	0.0047566	0.131375
ENSMUSG00000040732	-0.333652	0.0238733	0.320187
ENSMUSG00000040746	-0.343995	0.0465554	0.440847
ENSMUSG00000040747	0.455508	0.00305884	0.0997686
ENSMUSG00000040751	0.728957	0.00244013	0.0866912
ENSMUSG00000040812	0.548643	0.008137	0.174845
ENSMUSG00000040828	0.470716	0.0446202	NA
ENSMUSG00000040842	1.14884	4.73347e-07	0.000179478
ENSMUSG00000040899	0.912154	0.000100433	0.00904895
ENSMUSG00000040950	0.83816	8.30829e-05	0.00804313
ENSMUSG00000040978	0.576546	0.00679245	0.161177
ENSMUSG00000040987	-0.483108	0.00258443	0.0894232
ENSMUSG00000041117	-0.480471	0.00202054	0.076831
ENSMUSG00000041132	0.436156	0.00966434	0.19414
ENSMUSG00000041164	0.340742	0.0358982	0.390525
ENSMUSG00000041193	0.582755	0.0213522	0.303839
ENSMUSG00000041202	1.18391	9.48302e-07	0.000282936
ENSMUSG00000041258	0.554206	0.0020268	0.0768496
ENSMUSG00000041268	0.379024	0.0388347	0.403366
ENSMUSG00000041323	0.44195	0.0280933	0.349252
ENSMUSG00000041351	0.546461	0.00159494	0.0650849
ENSMUSG00000041417	-1.82148	1.56223e-30	1.42163e-26
ENSMUSG00000041431	-0.583076	0.0383014	0.40201
ENSMUSG00000041477	0.402538	0.0223938	0.311358
ENSMUSG00000041515	0.600863	0.000703188	0.0367759
ENSMUSG00000041552	0.624183	0.0262632	0.33685
ENSMUSG00000041642	0.420452	0.0227321	0.313477
ENSMUSG00000041654	0.330728	0.0498089	0.456227
ENSMUSG00000041685	-0.517034	0.0271156	0.343188
ENSMUSG00000041757	0.292338	0.0448647	0.436024
ENSMUSG00000041789	-0.647314	0.0218806	0.307511
ENSMUSG00000041809	0.505842	0.0117612	0.215742
ENSMUSG00000041817	-0.654051	0.0199526	0.291687
ENSMUSG00000041920	0.520393	0.0208415	0.299854
ENSMUSG00000041954	0.535523	0.029535	0.357167
ENSMUSG00000041966	-0.84844	0.000749165	0.0379724
ENSMUSG00000041986	0.442716	0.037394	0.397222
ENSMUSG00000041995	0.473351	0.00231491	0.0832636
ENSMUSG00000042029	-0.397426	0.0384458	0.402166
ENSMUSG00000042043	-0.341568	0.0290298	0.353879
ENSMUSG00000042063	-0.514704	0.011705	0.215618
ENSMUSG00000042129	0.734999	5.30771e-05	0.0058193
ENSMUSG00000042202	0.650182	0.00125916	0.0553542
ENSMUSG00000042254	0.892822	0.000607983	0.0324738
ENSMUSG00000042289	0.58653	0.00843642	0.177917
ENSMUSG00000042345	0.744983	0.00430132	0.123843
ENSMUSG00000042349	0.644142	0.00147795	0.0618359
ENSMUSG00000042351	0.632837	0.000217635	0.0161014
ENSMUSG00000042363	-0.341211	0.028755	0.352361
ENSMUSG00000042372	0.95437	0.000123242	NA
ENSMUSG00000042379	-1.06071	4.65496e-06	0.00102073
ENSMUSG00000042404	0.428187	0.0138649	0.23761
ENSMUSG00000042423	0.595166	0.00784613	0.1731
ENSMUSG00000042428	0.340747	0.0475473	0.446136
ENSMUSG00000042453	0.464105	0.025165	0.329974
ENSMUSG00000042514	0.701294	0.0117679	0.215742
ENSMUSG00000042541	-0.589466	0.00307151	0.0998241
ENSMUSG00000042644	0.320349	0.0366487	0.393514
ENSMUSG00000042677	0.827926	2.73365e-06	0.000651384
ENSMUSG00000042678	0.680836	0.0158538	0.255796
ENSMUSG00000042707	0.545225	0.0065765	0.157764
ENSMUSG00000042712	-0.306404	0.0340337	0.382353
ENSMUSG00000042734	0.637637	0.00167581	0.0671801
ENSMUSG00000042737	-0.579239	0.00829592	0.176234
ENSMUSG00000042744	0.326351	0.0432738	0.427802
ENSMUSG00000042788	0.610713	0.00982069	0.195768
ENSMUSG00000042793	0.456574	0.0465189	0.440731
ENSMUSG00000042817	0.935103	3.98205e-05	0.00464572
ENSMUSG00000042834	-0.46616	0.00720178	0.165424
ENSMUSG00000042961	-0.468119	0.0124466	0.221869
ENSMUSG00000043017	0.707123	0.000284016	0.0190517
ENSMUSG00000043020	0.568835	0.0100739	0.198855
ENSMUSG00000043099	0.551672	0.000757204	0.0379862
ENSMUSG00000043122	0.699262	0.00703008	0.163451
ENSMUSG00000043157	0.578048	0.00546747	0.143177
ENSMUSG00000043164	0.454914	0.043312	0.427947
ENSMUSG00000043241	-0.455599	0.0174237	0.269255
ENSMUSG00000043243	0.770073	0.00310507	0.100555
ENSMUSG00000043461	0.66504	0.00377168	0.11365
ENSMUSG00000043621	0.767913	5.56711e-06	0.00113844
ENSMUSG00000043740	0.649938	0.00916044	0.188384
ENSMUSG00000043807	0.860932	0.00226694	0.0820852
ENSMUSG00000043913	0.780549	0.000481139	0.0277112
ENSMUSG00000044052	0.666303	0.0157342	0.254093
ENSMUSG00000044155	-0.376792	0.0201633	0.293813
ENSMUSG00000044156	0.769649	0.000187573	0.0144654
ENSMUSG00000044162	0.771557	0.00640732	0.155277
ENSMUSG00000044254	-0.439377	0.0459168	NA
ENSMUSG00000044258	-0.829887	3.20286e-07	0.000138791
ENSMUSG00000044303	-0.593122	0.0351427	0.387657
ENSMUSG00000044330	-0.752381	0.00185078	0.0723369
ENSMUSG00000044393	0.340407	0.0313824	0.368745
ENSMUSG00000044433	0.363607	0.0308853	0.366436
ENSMUSG00000044453	0.567163	0.0323699	0.375244
ENSMUSG00000044501	-0.738331	0.000792732	0.039528
ENSMUSG00000044583	0.564831	0.00696765	0.163451
ENSMUSG00000044633	-0.747027	0.00151259	0.0625662
ENSMUSG00000044708	1.09066	0.000105283	0.00938316
ENSMUSG00000044726	0.5505	0.0134342	NA
ENSMUSG00000044772	0.451874	0.0227357	0.313477
ENSMUSG00000044811	0.57267	0.00268461	0.092015
ENSMUSG00000044827	0.665671	0.000323015	0.0208471
ENSMUSG00000044976	0.830759	0.00317554	0.101723
ENSMUSG00000045036	0.378199	0.0459624	0.438886
ENSMUSG00000045092	-0.321191	0.0292768	0.355462
ENSMUSG00000045165	0.332625	0.0326132	0.375321
ENSMUSG00000045216	0.322025	0.0248859	0.328443
ENSMUSG00000045232	0.456573	0.0206377	NA
ENSMUSG00000045312	0.615412	0.00185214	0.0723369
ENSMUSG00000045322	0.985013	1.07878e-05	0.00181794
ENSMUSG00000045328	-0.686366	0.0143718	0.242343
ENSMUSG00000045374	0.420117	0.00463317	0.129331
ENSMUSG00000045411	0.654975	0.00416665	0.121527
ENSMUSG00000045441	-0.506109	0.0148618	0.246342
ENSMUSG00000045467	0.646788	0.0191788	0.285407
ENSMUSG00000045502	0.622715	0.00321145	0.102183
ENSMUSG00000045624	-0.561426	0.0127959	0.226451
ENSMUSG00000045655	0.447313	0.0143796	0.242343
ENSMUSG00000045657	-0.472003	0.0171233	0.26669
ENSMUSG00000045730	-0.674093	7.19671e-05	0.00715738
ENSMUSG00000045761	0.512187	0.00902846	0.186937
ENSMUSG00000045763	0.545856	0.010267	0.200708
ENSMUSG00000045903	0.550028	0.0399831	NA
ENSMUSG00000045973	-0.890163	0.000236932	0.017025
ENSMUSG00000045980	0.59238	0.00801587	0.173715
ENSMUSG00000046207	0.486016	0.00304578	0.0997686
ENSMUSG00000046230	-0.500941	0.0212608	0.30325
ENSMUSG00000046314	-0.390199	0.0228214	0.313941
ENSMUSG00000046341	-0.401801	0.0186699	0.281752
ENSMUSG00000046456	0.846492	0.000471754	0.0273437
ENSMUSG00000046585	0.518733	0.0250004	0.328762
ENSMUSG00000046623	0.57594	0.0322882	NA
ENSMUSG00000046636	-0.46106	0.0169981	0.266235
ENSMUSG00000046637	0.725685	0.00150178	0.0622608
ENSMUSG00000046667	-0.68423	0.00785129	0.1731
ENSMUSG00000046688	0.51189	0.00751102	0.168558
ENSMUSG00000046711	0.569263	0.0336607	0.380383
ENSMUSG00000046733	-0.376676	0.0118728	0.216413
ENSMUSG00000046805	0.488675	0.010569	0.202906
ENSMUSG00000046828	-0.659672	0.012911	0.227474
ENSMUSG00000046886	0.395996	0.0350159	0.387657
ENSMUSG00000046982	0.620539	0.0266869	0.339889
ENSMUSG00000047021	0.506446	0.00305526	0.0997686
ENSMUSG00000047044	-0.341843	0.0187275	0.281966
ENSMUSG00000047061	-0.782868	0.0058073	0.148651
ENSMUSG00000047141	-0.425626	0.0328509	0.375321
ENSMUSG00000047228	0.754496	0.00499135	0.134964
ENSMUSG00000047260	-0.463424	0.00792567	0.173329
ENSMUSG00000047330	0.381708	0.0287286	0.352361
ENSMUSG00000047370	1.01616	0.000278126	0.0188174
ENSMUSG00000047407	0.644283	0.000284728	0.0190517
ENSMUSG00000047419	0.55854	0.0379422	0.400086
ENSMUSG00000047454	0.600165	0.000286845	0.019123
ENSMUSG00000047462	0.72187	0.00101613	0.0479107
ENSMUSG00000047547	-0.316297	0.0355319	0.389332
ENSMUSG00000047557	-0.322545	0.0295045	0.357167
ENSMUSG00000047604	0.596146	0.00647998	0.156621
ENSMUSG00000047642	0.669545	0.0171037	0.26669
ENSMUSG00000047671	0.674876	0.00457772	0.129263
ENSMUSG00000047773	0.939602	0.000319871	0.0207176
ENSMUSG00000047793	0.681096	0.00721523	0.165424
ENSMUSG00000047797	0.862799	0.000538166	0.0300448
ENSMUSG00000047798	0.465284	0.0358116	0.39031
ENSMUSG00000047810	0.729756	1.44331e-05	0.00219091
ENSMUSG00000047875	0.377219	0.0464599	0.440731
ENSMUSG00000047880	0.633296	0.0106966	0.20428
ENSMUSG00000047898	1.01783	0.000293619	0.0193618
ENSMUSG00000047905	-0.43767	0.0324551	0.375321
ENSMUSG00000047907	0.422776	0.011001	0.20705
ENSMUSG00000047945	0.422461	0.0230072	0.314835
ENSMUSG00000047976	0.790976	0.00378928	NA
ENSMUSG00000047986	-0.804276	0.00132251	0.0569022
ENSMUSG00000048078	0.481748	0.0355253	0.389332
ENSMUSG00000048100	-0.524379	0.0234508	0.317091
ENSMUSG00000048142	0.467362	0.0216717	0.305992
ENSMUSG00000048148	1.25137	7.1315e-06	0.00136625
ENSMUSG00000048234	0.32551	0.0467575	0.442004
ENSMUSG00000048280	-0.574933	0.0365648	0.393288
ENSMUSG00000048281	0.47044	0.0291294	NA
ENSMUSG00000048402	0.565727	0.00228687	0.0825812
ENSMUSG00000048416	0.448983	0.0214885	0.304769
ENSMUSG00000048485	-0.712921	0.00835701	0.177064
ENSMUSG00000048521	1.52383	5.64423e-10	5.13625e-07
ENSMUSG00000048709	-0.791759	0.00473387	0.131336
ENSMUSG00000048731	0.713507	0.00775539	0.171697
ENSMUSG00000048776	0.646433	0.0172316	0.26759
ENSMUSG00000048779	0.630991	0.000124876	0.0106203
ENSMUSG00000048794	0.610911	0.00623434	0.152918
ENSMUSG00000048833	0.622094	0.00122567	0.0545408
ENSMUSG00000048865	0.564015	0.000535514	0.0300217
ENSMUSG00000048897	0.741267	0.000105689	0.00938316
ENSMUSG00000049037	0.478323	0.0141351	0.240368
ENSMUSG00000049044	-0.381984	0.043978	0.431017
ENSMUSG00000049124	-0.481912	0.0209638	0.301138
ENSMUSG00000049130	0.597046	0.00301944	0.0996627
ENSMUSG00000049134	0.577134	0.0362352	0.392081
ENSMUSG00000049164	-0.533135	0.00645362	0.156191
ENSMUSG00000049295	0.498298	0.0043073	0.123843
ENSMUSG00000049307	0.51391	0.00908024	0.187158
ENSMUSG00000049404	0.581878	0.00795218	0.173329
ENSMUSG00000049571	0.536077	0.0170759	0.26669
ENSMUSG00000049580	0.472338	0.0413913	0.416558
ENSMUSG00000049588	0.529118	0.0374087	0.397222
ENSMUSG00000049606	-0.38384	0.0383591	0.402166
ENSMUSG00000049608	0.772549	0.00530474	0.140943
ENSMUSG00000049625	0.726157	2.25024e-05	0.00301136
ENSMUSG00000049723	1.01879	3.24168e-06	0.000737483
ENSMUSG00000049734	0.565788	0.046234	0.439764
ENSMUSG00000049804	-0.370028	0.0181794	0.277571
ENSMUSG00000049811	0.520893	0.015694	0.253894
ENSMUSG00000049823	0.715593	0.003311	0.104076
ENSMUSG00000049922	0.35795	0.0270262	0.342772
ENSMUSG00000049929	-0.528395	0.0251385	0.329974
ENSMUSG00000049988	0.51324	0.0344744	0.384684
ENSMUSG00000050022	0.669497	0.000259143	0.0177978
ENSMUSG00000050075	0.640816	0.00977613	0.195308
ENSMUSG00000050105	0.494084	0.0118125	0.215852
ENSMUSG00000050122	0.582293	0.00515812	0.138667
ENSMUSG00000050138	0.636634	0.00257221	0.0893971
ENSMUSG00000050157	0.576892	0.0198829	0.291145
ENSMUSG00000050232	0.725071	0.000937976	0.0448062
ENSMUSG00000050241	-0.639323	0.0243891	0.324475
ENSMUSG00000050295	0.457557	0.0212007	0.302867
ENSMUSG00000050370	0.905075	2.58349e-05	0.00337339
ENSMUSG00000050377	0.885069	9.26115e-05	0.00851278
ENSMUSG00000050490	-0.612724	0.000280901	0.0189348
ENSMUSG00000050578	-0.644759	0.0232047	0.315926
ENSMUSG00000050600	0.654529	0.00618767	0.152596
ENSMUSG00000050608	-0.402434	0.0345732	0.384852
ENSMUSG00000050640	0.390035	0.0390017	0.404002
ENSMUSG00000050896	0.481322	0.0352065	0.387868
ENSMUSG00000050947	-0.5887	0.0291106	0.35439
ENSMUSG00000050967	0.637657	0.0205227	0.29691
ENSMUSG00000051212	0.498108	0.0343897	0.384219
ENSMUSG00000051255	-0.307993	0.0406375	0.413793
ENSMUSG00000051279	0.527189	0.0479456	NA
ENSMUSG00000051314	0.602428	0.0283608	0.350533
ENSMUSG00000051367	0.599826	0.00585209	0.148947
ENSMUSG00000051435	0.432952	0.0276952	0.346666
ENSMUSG00000051439	0.877868	0.000122504	0.0104675
ENSMUSG00000051457	0.388562	0.0384006	0.402166
ENSMUSG00000051498	0.71903	0.00141855	0.0601811
ENSMUSG00000051506	0.805963	3.73818e-07	0.000154625
ENSMUSG00000051590	0.909216	2.6488e-05	0.00341902
ENSMUSG00000051969	0.970188	1.83156e-05	0.00260829
ENSMUSG00000051989	-0.467188	0.012878	0.227127
ENSMUSG00000051998	0.534091	0.0235656	0.318031
ENSMUSG00000052013	0.534214	0.0105483	0.202906
ENSMUSG00000052102	0.363035	0.0447026	0.435073
ENSMUSG00000052133	0.578105	0.0385435	0.402463
ENSMUSG00000052142	0.643334	0.00118868	0.0534172
ENSMUSG00000052155	-0.437177	0.0172745	0.267952
ENSMUSG00000052160	0.824	5.96176e-07	0.000217008
ENSMUSG00000052212	0.729236	0.00660874	0.158208
ENSMUSG00000052234	0.355627	0.0475929	NA
ENSMUSG00000052241	0.82884	0.00296446	0.0982754
ENSMUSG00000052270	0.442115	0.0423516	0.421432
ENSMUSG00000052273	0.391852	0.0339031	0.381357
ENSMUSG00000052302	0.536957	0.00292183	0.0970844
ENSMUSG00000052407	-0.799226	0.00165169	0.0667826
ENSMUSG00000052419	-0.677147	0.000175018	0.0137893
ENSMUSG00000052426	-0.646339	0.00700629	NA
ENSMUSG00000052613	0.385996	0.0370677	NA
ENSMUSG00000052724	0.709786	0.0120101	0.217497
ENSMUSG00000052837	0.805492	0.000580148	0.0316128
ENSMUSG00000052861	0.586144	0.00320121	0.102035
ENSMUSG00000052957	0.427385	0.00535195	0.141372
ENSMUSG00000053012	-0.789425	0.00158853	0.0649691
ENSMUSG00000053063	0.619781	0.00392428	0.117085
ENSMUSG00000053080	1.51317	1.71959e-23	5.2161e-20
ENSMUSG00000053110	-0.526506	0.00532113	0.140967
ENSMUSG00000053113	0.552009	0.00323732	0.102418
ENSMUSG00000053153	0.696867	0.000118861	0.0102331
ENSMUSG00000053158	0.378914	0.0198102	0.291132
ENSMUSG00000053175	0.567382	0.000437341	0.0261829
ENSMUSG00000053318	1.26113	2.27045e-07	0.000103305
ENSMUSG00000053560	0.454801	0.0378625	0.39998
ENSMUSG00000053574	-0.626061	0.0274133	0.344528
ENSMUSG00000053783	0.569643	0.00519286	0.138781
ENSMUSG00000053835	-0.345058	0.0237211	0.319323
ENSMUSG00000053846	0.414644	0.00440517	0.12606
ENSMUSG00000054128	0.566945	0.0409289	NA
ENSMUSG00000054150	0.642753	9.06025e-05	0.00837038
ENSMUSG00000054161	0.957467	0.000247159	0.0174848
ENSMUSG00000054252	0.44618	0.0257378	0.334746
ENSMUSG00000054312	-0.528381	0.0217668	0.306622
ENSMUSG00000054320	0.428292	0.0270769	0.343175
ENSMUSG00000054342	0.480937	0.0386993	0.403164
ENSMUSG00000054385	0.562651	0.0169125	0.26581
ENSMUSG00000054517	0.430517	0.00948402	0.191788
ENSMUSG00000054520	0.433066	0.0336911	0.380383
ENSMUSG00000054545	0.565747	0.0278893	0.348294
ENSMUSG00000054659	0.57893	0.0220365	0.308749
ENSMUSG00000054672	1.42376	4.62673e-07	0.000179163
ENSMUSG00000054716	-0.442246	0.0396746	0.408878
ENSMUSG00000054753	-0.57806	0.017507	NA
ENSMUSG00000055093	-0.334244	0.030037	0.360603
ENSMUSG00000055116	-0.528049	0.00808275	0.174268
ENSMUSG00000055254	0.720694	0.00187327	0.0726999
ENSMUSG00000055301	0.76894	0.000757637	0.0379862
ENSMUSG00000055320	-0.420058	0.0262052	0.336343
ENSMUSG00000055415	0.496817	0.0416437	0.417584
ENSMUSG00000055555	-0.459016	0.0325168	NA
ENSMUSG00000055567	-0.703971	0.00257726	0.0893971
ENSMUSG00000055795	-0.720316	0.00834851	NA
ENSMUSG00000055805	0.444287	0.0101501	0.199426
ENSMUSG00000055882	0.538869	0.023044	NA
ENSMUSG00000055884	0.465704	0.0248131	0.327958
ENSMUSG00000055978	0.566478	0.0456913	0.438367
ENSMUSG00000055994	0.684589	0.00239511	0.0857341
ENSMUSG00000056130	0.558362	0.0233325	0.316266
ENSMUSG00000056215	0.65904	0.00314115	0.101005
ENSMUSG00000056413	0.502647	0.00966349	0.19414
ENSMUSG00000056458	0.63656	0.00382905	0.114998
ENSMUSG00000056493	0.319743	0.038493	0.402166
ENSMUSG00000056498	0.571637	0.00126821	0.0554011
ENSMUSG00000056529	0.972222	2.39798e-06	0.000597853
ENSMUSG00000056569	0.593507	0.0128032	0.226451
ENSMUSG00000056648	0.550099	0.0490249	0.451774
ENSMUSG00000056752	0.649369	0.000850234	0.0415975
ENSMUSG00000056888	0.492029	0.0194669	0.287549
ENSMUSG00000057068	0.725238	0.00873124	0.182654
ENSMUSG00000057074	-0.643594	0.00125242	0.0551915
ENSMUSG00000057191	0.509474	0.0248683	0.328443
ENSMUSG00000057262	0.444942	0.038455	0.402166
ENSMUSG00000057265	0.810841	0.000154972	0.012648
ENSMUSG00000057322	-0.591638	0.0258436	0.335116
ENSMUSG00000057440	-0.406237	0.0224525	0.31146
ENSMUSG00000057816	0.954388	0.000383012	0.0238726
ENSMUSG00000057858	-0.381497	0.0415778	0.417383
ENSMUSG00000057886	-0.365036	0.0331634	0.377942
ENSMUSG00000057895	0.454627	0.0430147	0.426399
ENSMUSG00000058022	0.70375	0.0129243	0.227487
ENSMUSG00000058050	-0.567792	0.0244602	0.325025
ENSMUSG00000058099	0.618382	7.92369e-05	0.00775329
ENSMUSG00000058159	0.660795	0.0115817	0.213879
ENSMUSG00000058163	0.697964	0.00834449	0.177004
ENSMUSG00000058173	-0.362255	0.0412911	0.416243
ENSMUSG00000058503	-0.422611	0.0204799	0.296763
ENSMUSG00000058624	0.390859	0.0493104	0.45355
ENSMUSG00000058626	-0.580906	0.0404954	0.413637
ENSMUSG00000058715	0.477313	0.0161698	0.258891
ENSMUSG00000058755	0.912774	0.000277404	0.0188174
ENSMUSG00000058816	-0.751302	0.00683907	0.161522
ENSMUSG00000058818	0.844105	1.43941e-06	0.000391004
ENSMUSG00000058921	0.503647	0.0271352	0.343198
ENSMUSG00000058975	0.566078	0.0452332	0.43784
ENSMUSG00000059089	0.533726	0.0153687	0.250636
ENSMUSG00000059142	-0.531876	0.0117426	0.215742
ENSMUSG00000059325	-0.627014	0.00902725	0.186937
ENSMUSG00000059326	0.674584	0.000249037	0.0174848
ENSMUSG00000059395	-0.596358	0.0258713	0.335116
ENSMUSG00000059456	0.361016	0.0290806	0.354261
ENSMUSG00000059498	0.565375	0.00363258	0.111114
ENSMUSG00000059534	-0.46787	0.0347574	0.386429
ENSMUSG00000059588	-0.346158	0.0237646	0.319672
ENSMUSG00000059647	-0.391359	0.0302312	0.361266
ENSMUSG00000059751	-0.649326	0.00113796	0.0516482
ENSMUSG00000059824	0.732579	1.58661e-05	0.00232874
ENSMUSG00000059854	0.655609	0.00107078	0.0498419
ENSMUSG00000059897	-0.452849	0.0264998	0.338822
ENSMUSG00000060112	0.36112	0.0443242	NA
ENSMUSG00000060131	0.450202	0.028421	0.350925
ENSMUSG00000060176	0.378457	0.0476738	0.446136
ENSMUSG00000060183	0.808772	0.00067535	NA
ENSMUSG00000060188	0.68327	0.00842103	0.177799
ENSMUSG00000060212	0.534254	0.0344909	0.384684
ENSMUSG00000060487	-0.459173	0.0144301	0.242851
ENSMUSG00000060509	0.814915	0.00102245	0.0479601
ENSMUSG00000060586	0.712091	0.000425964	0.0257206
ENSMUSG00000060639	0.535965	0.0253723	0.331362
ENSMUSG00000060680	-0.490805	0.0182282	0.277851
ENSMUSG00000060924	0.698074	0.0101576	0.199426
ENSMUSG00000060962	0.835412	0.000216622	0.0160919
ENSMUSG00000060989	1.67527	1.01429e-27	4.61503e-24
ENSMUSG00000061126	-0.455243	0.0292488	0.355359
ENSMUSG00000061132	0.557074	0.0076474	0.17093
ENSMUSG00000061136	-0.451652	0.0285452	0.351742
ENSMUSG00000061353	-0.69789	0.00419587	0.121794
ENSMUSG00000061360	-0.414319	0.0247394	0.327222
ENSMUSG00000061397	0.590348	0.0220023	0.30865
ENSMUSG00000061410	0.455698	0.0084064	0.177799
ENSMUSG00000061517	1.14498	5.54833e-05	0.00602472
ENSMUSG00000061577	0.563396	0.0141284	0.240368
ENSMUSG00000061665	-0.362226	0.0438465	0.430367
ENSMUSG00000061718	0.401679	0.0476053	0.446136
ENSMUSG00000061723	0.619413	0.0239959	0.321358
ENSMUSG00000061755	-0.446329	0.0409201	0.414182
ENSMUSG00000061947	0.725721	0.00804883	0.173977
ENSMUSG00000062040	-0.562882	0.0054427	0.14294
ENSMUSG00000062082	0.713798	0.00074493	0.0379724
ENSMUSG00000062098	-0.328406	0.044253	0.431989
ENSMUSG00000062210	0.348477	0.0436901	0.429491
ENSMUSG00000062328	-0.588922	0.00455295	0.12887
ENSMUSG00000062329	-0.318608	0.0496868	0.455796
ENSMUSG00000062461	-0.558057	0.0365691	0.393288
ENSMUSG00000062524	-0.546217	0.00674179	0.160393
ENSMUSG00000062661	0.450532	0.0315946	0.369551
ENSMUSG00000062743	-0.541566	0.0287607	0.352361
ENSMUSG00000062778	-0.580818	0.000253331	0.0175978
ENSMUSG00000062859	0.56152	0.0159183	0.256151
ENSMUSG00000062939	0.376772	0.0467748	0.442004
ENSMUSG00000063130	0.908715	0.0013045	0.0563943
ENSMUSG00000063171	-0.36465	0.0461625	0.439707
ENSMUSG00000063193	0.400776	0.0315855	0.369551
ENSMUSG00000063430	0.470758	0.0231273	0.31553
ENSMUSG00000063529	0.510707	0.0324031	0.375321
ENSMUSG00000063531	-0.325396	0.0281945	0.349789
ENSMUSG00000063558	-0.331851	0.0242376	0.323168
ENSMUSG00000063600	0.780699	0.00102015	0.0479601
ENSMUSG00000063730	-0.77203	0.00605513	0.150757
ENSMUSG00000063739	-0.428912	0.0327295	0.375321
ENSMUSG00000063779	1.14546	2.49431e-05	0.00331361
ENSMUSG00000064057	0.505473	0.0184334	0.279722
ENSMUSG00000064125	0.611848	0.00790611	0.173329
ENSMUSG00000064246	0.555337	0.0127999	0.226451
ENSMUSG00000064267	0.748166	8.20895e-05	0.00798946
ENSMUSG00000064280	0.438132	0.0456785	0.438367
ENSMUSG00000064307	0.479872	0.0063751	0.155116
ENSMUSG00000064339	-0.384092	0.0364781	0.393288
ENSMUSG00000064359	-0.630779	0.0231585	0.315719
ENSMUSG00000064360	-0.566708	0.000821008	0.0404942
ENSMUSG00000064364	-0.70482	0.00170442	0.0680271
ENSMUSG00000064366	-0.726844	0.00108824	0.0501448
ENSMUSG00000064368	-0.591898	0.00487084	0.132412
ENSMUSG00000064369	-0.621829	0.00638668	0.155166
ENSMUSG00000065037	1.12129	1.23757e-05	0.00198175
ENSMUSG00000065952	-0.576497	0.0307679	0.365519
ENSMUSG00000066057	-0.592833	0.0285115	0.351564
ENSMUSG00000066108	0.608441	0.00711572	0.164649
ENSMUSG00000066129	0.504323	0.0147456	0.245588
ENSMUSG00000066196	0.551244	0.0195021	0.287549
ENSMUSG00000066270	-0.446469	0.0283693	0.350533
ENSMUSG00000066366	0.661795	0.0176659	0.272012
ENSMUSG00000066456	-0.407299	0.0351118	0.387657
ENSMUSG00000066491	-0.651403	0.0136307	0.234702
ENSMUSG00000066800	-0.594848	0.0128692	0.227127
ENSMUSG00000066902	-0.478295	0.0216549	0.305992
ENSMUSG00000067149	0.758646	0.00376463	0.113626
ENSMUSG00000067158	-0.617541	0.00303558	0.0997686
ENSMUSG00000067341	0.552102	0.0453744	0.43784
ENSMUSG00000067577	0.534961	0.0264935	NA
ENSMUSG00000067599	-0.500217	0.0411181	NA
ENSMUSG00000067616	0.567887	0.0450439	0.436828
ENSMUSG00000067629	0.381105	0.0438643	0.430367
ENSMUSG00000067714	0.791364	0.000706422	0.0368392
ENSMUSG00000067719	-0.435746	0.0239681	0.321223
ENSMUSG00000067768	0.692914	0.0106701	0.203987
ENSMUSG00000067924	-0.569327	0.00872919	0.182654
ENSMUSG00000067942	-0.518297	0.016202	0.258891
ENSMUSG00000068014	-0.409424	0.0357336	0.389899
ENSMUSG00000068105	0.826289	0.000160208	0.0129017
ENSMUSG00000068299	1.08	8.60177e-05	0.00819831
ENSMUSG00000068428	-0.614978	0.00669372	0.159667
ENSMUSG00000068551	0.487606	0.0233377	0.316266
ENSMUSG00000068606	0.751646	0.00741554	0.16724
ENSMUSG00000068617	0.469384	0.0178339	0.273443
ENSMUSG00000068748	0.507486	0.0232084	0.315926
ENSMUSG00000068876	-0.329041	0.0247251	0.327222
ENSMUSG00000068882	-0.40469	0.0240419	0.32173
ENSMUSG00000069045	-0.529893	0.00786938	0.1731
ENSMUSG00000069072	0.512025	0.0230472	NA
ENSMUSG00000069305	0.796714	0.0048745	0.132412
ENSMUSG00000069662	-0.331275	0.0290121	0.353879
ENSMUSG00000069727	-0.622524	0.0154893	0.251476
ENSMUSG00000069743	-0.701157	0.00576921	0.148095
ENSMUSG00000069755	-0.399808	0.0455382	0.438316
ENSMUSG00000069806	0.407223	0.0393415	0.406134
ENSMUSG00000069862	-0.57517	0.0131589	0.229399
ENSMUSG00000069913	-1.03915	0.000253231	0.0175978
ENSMUSG00000070000	0.519116	0.0287697	0.352361
ENSMUSG00000070354	1.13671	2.0778e-06	0.000540229
ENSMUSG00000070509	0.399708	0.0243097	0.323656
ENSMUSG00000070576	0.429669	0.0100132	0.198735
ENSMUSG00000070644	0.738767	0.00750601	NA
ENSMUSG00000070691	0.740091	0.000207945	0.0156388
ENSMUSG00000070803	0.561094	0.0313605	0.368745
ENSMUSG00000070873	0.413978	0.0241938	0.32282
ENSMUSG00000070877	0.495434	0.0272986	0.344319
ENSMUSG00000070942	0.602405	0.00551514	0.143599
ENSMUSG00000071005	0.871276	0.00203891	0.077148
ENSMUSG00000071203	0.765698	0.000518834	0.0294168
ENSMUSG00000071266	-0.554356	0.00801759	0.173715
ENSMUSG00000071267	-0.596272	0.00475692	0.131375
ENSMUSG00000071281	-0.455175	0.0371985	0.396146
ENSMUSG00000071324	0.493195	0.0202042	0.294049
ENSMUSG00000071347	0.614574	0.0301038	0.360929
ENSMUSG00000071392	0.493162	0.036676	0.393575
ENSMUSG00000071398	0.555291	0.008091	0.174268
ENSMUSG00000071478	0.614508	0.0285203	NA
ENSMUSG00000071528	-0.535753	0.0186245	0.281533
ENSMUSG00000071550	0.590669	0.00195882	0.075212
ENSMUSG00000071552	0.67489	0.0108666	0.205799
ENSMUSG00000071656	0.529465	0.0346933	0.385952
ENSMUSG00000071713	1.02167	1.30686e-07	6.99555e-05
ENSMUSG00000071714	0.979475	2.15723e-06	0.000552981
ENSMUSG00000071715	0.524522	0.0155239	0.251813
ENSMUSG00000071855	-0.569477	0.00193222	0.0744939
ENSMUSG00000071856	-0.32921	0.0395387	0.407868
ENSMUSG00000072109	1.18795	1.54271e-05	0.00228271
ENSMUSG00000072596	0.472078	0.013485	0.233295
ENSMUSG00000072600	0.517121	0.0382176	0.401594
ENSMUSG00000072754	0.472922	0.0178833	NA
ENSMUSG00000072762	-0.5695	0.0356239	0.389872
ENSMUSG00000072770	1.01285	3.76841e-05	0.00444632
ENSMUSG00000073403	-0.574064	0.0144376	0.242851
ENSMUSG00000073421	0.758693	0.000110422	0.00973517
ENSMUSG00000073427	-0.812458	0.00375101	0.113403
ENSMUSG00000073434	-0.586734	0.0372793	0.396738
ENSMUSG00000073435	-0.833329	0.00316827	0.101697
ENSMUSG00000073492	0.584753	0.0363082	0.392564
ENSMUSG00000073616	-0.584959	0.00449247	0.127754
ENSMUSG00000073633	0.457347	0.0462477	0.439764
ENSMUSG00000073664	-0.573794	0.00399938	0.118164
ENSMUSG00000073802	-0.439614	0.00740879	0.16724
ENSMUSG00000074071	0.610411	0.0121376	0.219151
ENSMUSG00000074121	0.481243	0.0253983	0.331362
ENSMUSG00000074151	0.75059	0.000116886	0.0101301
ENSMUSG00000074158	-0.814561	0.000736738	0.0377708
ENSMUSG00000074165	-0.59198	0.0229149	0.314673
ENSMUSG00000074194	-0.497623	0.0476649	0.446136
ENSMUSG00000074342	0.671994	0.000425489	0.0257206
ENSMUSG00000074398	0.59569	0.0337696	0.381034
ENSMUSG00000074457	-0.492183	0.00519235	0.138781
ENSMUSG00000074580	0.652645	0.0181276	0.277013
ENSMUSG00000074591	0.659611	0.0105636	0.202906
ENSMUSG00000074622	0.619111	0.00289795	0.0967959
ENSMUSG00000074637	0.55592	0.00526858	0.140393
ENSMUSG00000074794	-0.458221	0.0497708	0.456107
ENSMUSG00000074796	0.517737	0.0405211	0.413637
ENSMUSG00000074802	0.54071	0.0358454	0.39031
ENSMUSG00000074863	-0.449779	0.0420405	0.419713
ENSMUSG00000074903	-0.452272	0.021296	0.303276
ENSMUSG00000075014	1.27097	7.62976e-06	0.00144648
ENSMUSG00000075015	0.775755	0.000977602	NA
ENSMUSG00000075302	0.676704	0.00397236	0.117748
ENSMUSG00000075304	0.772919	0.000306063	0.0200372
ENSMUSG00000075420	0.64897	0.0134009	0.232503
ENSMUSG00000075528	-0.449373	0.0154255	0.250886
ENSMUSG00000076465	0.587139	0.0328002	0.375321
ENSMUSG00000076480	0.606021	0.0327359	0.375321
ENSMUSG00000076501	0.974108	0.000379358	0.0237262
ENSMUSG00000076523	1.1992	1.45808e-05	0.00219314
ENSMUSG00000076532	1.00179	0.000411751	0.0252319
ENSMUSG00000076534	0.55759	0.0193983	0.287022
ENSMUSG00000076535	0.800004	0.00483924	0.132412
ENSMUSG00000076538	1.17853	3.22884e-05	0.0039706
ENSMUSG00000076540	0.730159	0.00548851	0.143311
ENSMUSG00000076541	0.857502	0.00159944	0.0651226
ENSMUSG00000076549	1.12446	1.28527e-05	0.00203407
ENSMUSG00000076550	0.539377	0.0386647	NA
ENSMUSG00000076556	1.40298	7.23298e-07	0.000239346
ENSMUSG00000076562	1.13406	2.74023e-05	0.00348756
ENSMUSG00000076563	1.37838	3.78178e-08	2.29428e-05
ENSMUSG00000076564	1.35064	1.93891e-06	0.000511423
ENSMUSG00000076569	1.26452	5.75581e-06	0.00115116
ENSMUSG00000076576	0.581372	0.0123558	0.22114
ENSMUSG00000076577	1.10822	8.60372e-05	0.00819831
ENSMUSG00000076578	0.596194	0.0255715	0.332905
ENSMUSG00000076583	1.03137	0.000229546	0.016778
ENSMUSG00000076586	0.894925	0.00145068	0.0611165
ENSMUSG00000076594	1.35833	1.01529e-06	0.000298035
ENSMUSG00000076613	0.845615	0.00187342	0.0726999
ENSMUSG00000076614	1.06373	9.32474e-05	0.00852815
ENSMUSG00000076615	1.10163	3.52932e-05	0.00425388
ENSMUSG00000076617	1.52846	1.55069e-11	1.76391e-08
ENSMUSG00000076655	0.614065	0.0131683	NA
ENSMUSG00000076666	0.830612	0.00166867	0.0670839
ENSMUSG00000076668	1.20517	1.99879e-05	0.00273519
ENSMUSG00000076670	1.20387	1.19906e-05	NA
ENSMUSG00000076672	1.66485	2.31063e-09	1.75222e-06
ENSMUSG00000076680	1.02835	5.56128e-05	0.00602472
ENSMUSG00000076695	0.931125	0.000875134	0.0425868
ENSMUSG00000076731	0.753299	0.00507259	0.136772
ENSMUSG00000076749	1.06381	8.8903e-05	0.0083329
ENSMUSG00000076752	0.932146	0.000748547	0.0379724
ENSMUSG00000076934	1.15584	6.0645e-06	0.00119972
ENSMUSG00000076937	1.29281	1.33722e-06	0.00036875
ENSMUSG00000077709	-0.995594	9.61095e-05	NA
ENSMUSG00000078157	0.567709	0.0453397	0.43784
ENSMUSG00000078161	0.823546	0.000141623	0.0118368
ENSMUSG00000078238	-0.492435	0.0261224	0.335754
ENSMUSG00000078252	-0.699055	0.00918608	0.188486
ENSMUSG00000078429	0.504083	0.029523	0.357167
ENSMUSG00000078435	-0.580076	0.0332128	0.378032
ENSMUSG00000078440	0.857624	0.000695512	0.0364793
ENSMUSG00000078451	0.609851	0.00623331	0.152918
ENSMUSG00000078490	0.575505	0.00665213	0.158883
ENSMUSG00000078496	-0.713816	0.0114094	0.211555
ENSMUSG00000078552	0.737123	0.00346684	0.107074
ENSMUSG00000078584	0.376496	0.031581	0.369551
ENSMUSG00000078588	0.741352	0.00826635	0.176234
ENSMUSG00000078656	-0.504915	0.0373134	0.396738
ENSMUSG00000078771	0.76994	0.00179979	0.0711126
ENSMUSG00000078776	0.508688	0.0376155	0.398953
ENSMUSG00000078789	-0.413039	0.0260809	0.335562
ENSMUSG00000078862	-0.811214	6.09381e-05	0.00619594
ENSMUSG00000078864	-0.824561	0.00149665	0.0621897
ENSMUSG00000078866	-0.803702	5.96531e-05	0.00619594
ENSMUSG00000078875	-0.741368	0.00386058	0.115754
ENSMUSG00000078877	-0.803618	0.0039645	0.117748
ENSMUSG00000078879	-0.650015	0.0039088	0.116991
ENSMUSG00000078889	-0.559632	0.00210457	0.0780106
ENSMUSG00000078903	-0.699112	0.0134722	0.233295
ENSMUSG00000078915	-0.427501	0.0259031	0.335116
ENSMUSG00000078921	0.715456	0.00202209	0.076831
ENSMUSG00000078942	0.81063	0.000194829	0.0147746
ENSMUSG00000078945	0.722651	0.000114915	0.0100069
ENSMUSG00000078956	-0.733783	5.01424e-05	0.00559977
ENSMUSG00000079020	-0.33679	0.0266399	0.339601
ENSMUSG00000079065	-0.506703	0.0211457	0.302556
ENSMUSG00000079083	-0.419046	0.0141092	0.240368
ENSMUSG00000079225	0.415668	0.0401931	0.412585
ENSMUSG00000079227	0.710734	0.00253593	0.0885873
ENSMUSG00000079293	0.766451	1.68689e-05	0.00245611
ENSMUSG00000079298	0.785037	0.000980111	0.0466964
ENSMUSG00000079317	-0.31425	0.0422812	0.421192
ENSMUSG00000079355	-0.429012	0.0137458	0.236459
ENSMUSG00000079426	-0.561169	0.0144588	0.242982
ENSMUSG00000079445	0.731808	0.00218163	0.0802133
ENSMUSG00000079484	0.609509	0.00888792	0.185292
ENSMUSG00000079492	0.900199	0.00023364	0.0169412
ENSMUSG00000079502	0.588271	0.0171297	0.26669
ENSMUSG00000079543	0.803122	0.00461357	0.129331
ENSMUSG00000079553	-0.690705	0.00538177	0.141954
ENSMUSG00000079555	-0.593138	0.0044376	0.126789
ENSMUSG00000079620	0.821589	0.00138871	0.0591911
ENSMUSG00000079845	0.609267	0.0284431	0.350959
ENSMUSG00000080746	0.721185	0.000571497	0.031329
ENSMUSG00000080921	-0.472593	0.0357101	0.389899
ENSMUSG00000081044	0.57034	0.0356858	NA
ENSMUSG00000081058	0.516958	0.0226647	0.312973
ENSMUSG00000081239	-0.519242	0.0153646	0.250636
ENSMUSG00000081492	0.401609	0.0328926	NA
ENSMUSG00000081665	0.721206	0.000630258	0.03354
ENSMUSG00000081723	0.780468	1.44455e-05	0.00219091
ENSMUSG00000081769	-0.590531	0.0254998	0.332209
ENSMUSG00000081967	-0.636424	0.0146193	NA
ENSMUSG00000081999	-0.351092	0.0421437	0.420282
ENSMUSG00000082044	-0.684966	0.0102461	0.200515
ENSMUSG00000082145	-0.577884	0.0246665	NA
ENSMUSG00000082286	0.409091	0.0479775	0.446136
ENSMUSG00000082433	0.556297	0.00163493	0.0662709
ENSMUSG00000082454	-0.338694	0.038242	0.401619
ENSMUSG00000082475	-0.480949	0.0306336	0.364399
ENSMUSG00000082536	0.43931	0.0318884	0.371591
ENSMUSG00000082674	-0.566962	0.034182	0.383074
ENSMUSG00000082809	-0.497533	0.00286332	0.0964938
ENSMUSG00000082876	-0.436584	0.0477475	0.446136
ENSMUSG00000082896	-0.526199	0.0143808	0.242343
ENSMUSG00000083027	-0.852854	0.00207923	0.0777041
ENSMUSG00000083111	-0.641934	0.0206473	0.298002
ENSMUSG00000083311	-0.620728	0.0152657	0.250077
ENSMUSG00000083411	-0.494231	0.0153607	0.250636
ENSMUSG00000083454	-0.799702	0.0048518	0.132412
ENSMUSG00000083538	-0.555801	0.0280511	NA
ENSMUSG00000083621	-0.439202	0.0105294	0.202906
ENSMUSG00000083670	-0.446818	0.0369291	0.394662
ENSMUSG00000083854	-0.522946	0.0475457	0.446136
ENSMUSG00000083892	-0.40595	0.0388542	0.403366
ENSMUSG00000084067	-0.461516	0.0110564	0.207321
ENSMUSG00000084085	-0.41466	0.0415204	NA
ENSMUSG00000084168	-0.565116	0.0438366	NA
ENSMUSG00000084235	-0.665883	0.00042086	0.0256176
ENSMUSG00000084314	-0.435121	0.0324672	0.375321
ENSMUSG00000084799	-0.632169	0.0200482	0.292838
ENSMUSG00000084803	0.641679	0.0238446	0.320187
ENSMUSG00000084817	-0.62898	0.00621061	0.152918
ENSMUSG00000084822	-0.604968	0.00501227	NA
ENSMUSG00000084830	-0.585496	0.00739135	0.167109
ENSMUSG00000084902	0.574735	0.0138048	0.237249
ENSMUSG00000084910	-0.486682	0.015437	0.250886
ENSMUSG00000084957	-0.345885	0.0368738	0.394302
ENSMUSG00000085084	-0.952735	0.000508121	NA
ENSMUSG00000085241	-0.553217	0.0477342	0.446136
ENSMUSG00000085385	0.37805	0.0423177	0.421326
ENSMUSG00000085565	0.67425	0.0133025	NA
ENSMUSG00000085614	-0.436215	0.0403966	0.413637
ENSMUSG00000085636	0.372477	0.0414202	NA
ENSMUSG00000085720	0.576151	0.0278236	0.348034
ENSMUSG00000085887	0.617359	0.0225454	0.312035
ENSMUSG00000085967	0.412577	0.0299093	NA
ENSMUSG00000085976	-0.689393	0.00723681	0.165424
ENSMUSG00000086228	0.74343	0.0044699	NA
ENSMUSG00000086287	-0.569916	0.0259305	NA
ENSMUSG00000086513	-0.527054	0.0406532	0.413793
ENSMUSG00000086514	0.517124	0.012246	NA
ENSMUSG00000086537	-0.406494	0.029641	NA
ENSMUSG00000086587	-0.644982	0.018708	0.281966
ENSMUSG00000086596	0.512125	0.0480685	0.44651
ENSMUSG00000086706	1.09184	0.000119199	0.0102331
ENSMUSG00000086922	-0.385392	0.00725488	0.165462
ENSMUSG00000087001	-0.521188	0.0296402	0.357726
ENSMUSG00000087057	-0.640953	0.00935065	0.190053
ENSMUSG00000087111	0.575731	0.0363229	0.392564
ENSMUSG00000087153	-0.878811	0.00146046	0.0613865
ENSMUSG00000087340	0.663156	0.006112	NA
ENSMUSG00000087365	-0.576018	0.00313622	0.101005
ENSMUSG00000087431	-0.613726	0.00287891	0.0964938
ENSMUSG00000087458	0.589858	0.0338883	0.381357
ENSMUSG00000087642	1.49893	3.86075e-08	NA
ENSMUSG00000087644	0.476101	0.0336397	NA
ENSMUSG00000087687	-0.5007	0.0328832	0.375454
ENSMUSG00000087691	-0.497125	0.0373195	0.396738
ENSMUSG00000087701	-0.47787	0.0161883	0.258891
ENSMUSG00000089417	-0.566059	0.0455416	0.438316
ENSMUSG00000089715	-0.668231	0.010796	0.20553
ENSMUSG00000089722	0.556805	0.0123814	0.22114
ENSMUSG00000089753	0.550434	0.0272315	0.344096
ENSMUSG00000089762	0.356641	0.0436777	0.429491
ENSMUSG00000089768	-0.609272	0.0199444	NA
ENSMUSG00000089818	0.538729	0.0453042	NA
ENSMUSG00000089824	-0.422794	0.0287622	0.352361
ENSMUSG00000089901	0.768947	0.00253046	0.088566
ENSMUSG00000089960	3.1242	2.15028e-29	1.30451e-25
ENSMUSG00000090031	-1.11433	6.70224e-05	0.00673927
ENSMUSG00000090093	-0.649403	0.0222304	0.310392
ENSMUSG00000090136	-0.442971	0.0187306	0.281966
ENSMUSG00000090141	-0.456756	0.0423127	NA
ENSMUSG00000090164	0.798273	0.00262777	0.0904973
ENSMUSG00000090173	0.624714	0.0267637	0.340169
ENSMUSG00000090231	0.889137	0.000343704	0.0218721
ENSMUSG00000090291	0.433702	0.0326732	0.375321
ENSMUSG00000090877	-0.604488	0.0035079	0.108027
ENSMUSG00000091405	0.649216	0.021585	0.305717
ENSMUSG00000091523	0.983012	0.000478784	0.0276631
ENSMUSG00000091568	-0.585808	0.0355139	NA
ENSMUSG00000091580	-0.484157	0.0453375	0.43784
ENSMUSG00000091697	-0.565586	0.0446013	0.434552
ENSMUSG00000091712	0.713256	0.0108443	0.205701
ENSMUSG00000092074	1.04521	1.23303e-05	0.00198175
ENSMUSG00000092187	-0.599325	0.023295	0.316266
ENSMUSG00000092329	0.664018	0.0039147	0.116991
ENSMUSG00000092517	0.764889	0.00546295	NA
ENSMUSG00000094006	0.607371	0.0169456	0.266099
ENSMUSG00000094094	1.47565	1.99804e-07	9.3242e-05
ENSMUSG00000094164	1.67812	1.70658e-09	1.35042e-06
ENSMUSG00000094174	1.13108	1.14485e-05	NA
ENSMUSG00000094322	0.837283	0.000983909	NA
ENSMUSG00000094344	-0.511347	0.0233262	0.316266
ENSMUSG00000094345	1.90696	2.82727e-12	3.43042e-09
ENSMUSG00000094410	-0.776175	0.00347108	0.107074
ENSMUSG00000094420	0.982125	0.000428308	0.0257268
ENSMUSG00000094433	0.875549	0.000655097	0.0345587
ENSMUSG00000094475	-0.520543	0.0135608	0.233941
ENSMUSG00000094509	1.28646	5.08703e-06	0.00106974
ENSMUSG00000094530	-0.468406	0.0206282	0.298002
ENSMUSG00000094546	1.10103	6.99406e-05	0.00699406
ENSMUSG00000094683	0.440785	0.0462237	0.439764
ENSMUSG00000094686	0.419919	0.0190572	0.284529
ENSMUSG00000094694	1.08042	0.000141781	0.0118368
ENSMUSG00000094695	0.556403	0.0351378	NA
ENSMUSG00000094719	-0.610995	0.0298346	0.358882
ENSMUSG00000094737	-0.556729	0.045952	0.438886
ENSMUSG00000094786	-1.97327	1.74697e-14	2.64957e-11
ENSMUSG00000094940	0.610467	0.0102713	NA
ENSMUSG00000094951	1.1398	5.66538e-05	0.00610118
ENSMUSG00000094973	-0.355943	0.0449184	NA
ENSMUSG00000094974	-0.615137	0.0302925	0.361663
ENSMUSG00000095007	2.18249	8.86487e-19	1.61341e-15
ENSMUSG00000095029	0.843499	0.00183936	0.0721574
ENSMUSG00000095105	0.61332	0.0238713	0.320187
ENSMUSG00000095159	-0.368292	0.0340928	0.382545
ENSMUSG00000095170	0.851728	0.000536101	0.0300217
ENSMUSG00000095193	-0.915691	0.00117661	0.0532693
ENSMUSG00000095200	1.24532	1.04792e-05	0.00179926
ENSMUSG00000095204	0.573123	0.0269483	NA
ENSMUSG00000095210	0.83249	0.00173299	0.0688656
ENSMUSG00000095280	0.873456	0.000322905	NA
ENSMUSG00000095366	0.741283	0.00768236	0.171014
ENSMUSG00000095379	0.67839	0.00963807	0.194127
ENSMUSG00000095429	1.284	5.52992e-06	0.00113844
ENSMUSG00000095478	-0.403924	0.0124859	0.222351
ENSMUSG00000095497	1.21297	9.36545e-06	0.00167109
ENSMUSG00000095571	0.996229	0.000356572	0.0226119
ENSMUSG00000095583	1.17392	2.07125e-05	0.00281319
ENSMUSG00000095616	0.628076	0.0065495	NA
ENSMUSG00000095630	1.03985	0.000133595	0.0112566
ENSMUSG00000095633	1.32431	2.65382e-06	0.000650213
ENSMUSG00000095642	1.04601	6.02343e-05	0.00619594
ENSMUSG00000095677	0.436681	0.0275844	0.346024
ENSMUSG00000095700	0.516131	0.0270143	NA
ENSMUSG00000095753	1.20496	2.20652e-05	0.00297471
ENSMUSG00000095771	0.644684	0.00946351	0.191788
ENSMUSG00000095788	0.718446	0.000456435	0.027059
ENSMUSG00000095794	1.96001	7.70908e-14	1.07927e-10
ENSMUSG00000095863	1.36111	1.52873e-06	0.000409159
ENSMUSG00000095955	-0.437024	0.00898764	0.186517
ENSMUSG00000095990	-0.560271	0.0417808	0.418267
ENSMUSG00000096108	0.710214	0.00401768	0.118512
ENSMUSG00000096129	0.399934	0.0332945	NA
ENSMUSG00000096173	-0.638335	0.0225124	0.311815
ENSMUSG00000096255	0.423713	0.033674	0.380383
ENSMUSG00000096336	1.65353	7.08192e-10	5.85868e-07
ENSMUSG00000096410	0.600414	0.00663029	NA
ENSMUSG00000096433	-0.587333	0.00724411	0.165424
ENSMUSG00000096459	1.27197	4.91293e-06	0.00105329
ENSMUSG00000096464	1.02997	0.000165195	0.0131866
ENSMUSG00000096490	1.93525	6.4058e-13	8.32754e-10
ENSMUSG00000096498	1.46139	2.64074e-07	0.000117223
ENSMUSG00000096499	0.593461	0.0301602	0.361266
ENSMUSG00000096515	0.577586	0.0333918	0.379121
ENSMUSG00000096594	1.22909	1.23254e-05	0.00198175
ENSMUSG00000096638	0.691126	0.00808756	0.174268
ENSMUSG00000096715	0.827702	0.0033827	0.10524
ENSMUSG00000096764	1.05281	0.000153029	0.0125456
ENSMUSG00000096780	0.356295	0.0440815	0.431567
ENSMUSG00000096795	-0.625146	0.00712817	0.164649
ENSMUSG00000096805	1.48706	1.21904e-07	6.72317e-05
ENSMUSG00000096842	-0.685156	0.00700998	0.163451
ENSMUSG00000096844	0.655678	0.0118188	NA
ENSMUSG00000096856	-0.397722	0.0454928	0.438311
ENSMUSG00000096918	0.535817	0.0469223	NA
ENSMUSG00000096940	0.655417	0.0149999	NA
ENSMUSG00000096971	0.64977	0.00609767	0.151067
ENSMUSG00000097015	-0.563248	0.0360657	0.39139
ENSMUSG00000097058	-0.643518	0.00274752	0.0933174
ENSMUSG00000097059	0.534908	0.0132695	0.230885
ENSMUSG00000097074	0.934197	0.000209428	NA
ENSMUSG00000097182	-0.362492	0.0426019	NA
ENSMUSG00000097184	-0.46955	0.0269742	0.34235
ENSMUSG00000097263	-0.646828	0.0189934	0.284226
ENSMUSG00000097296	0.525861	0.0190057	0.284226
ENSMUSG00000097312	0.442339	0.0454245	NA
ENSMUSG00000097324	0.640539	0.0189913	NA
ENSMUSG00000097328	0.557858	0.0123711	0.22114
ENSMUSG00000097331	-0.610689	0.0182292	NA
ENSMUSG00000097462	0.803665	0.00155741	0.0639837
ENSMUSG00000097466	0.573667	0.0240772	0.321736
ENSMUSG00000097471	0.445855	0.0404833	0.413637
ENSMUSG00000097503	-0.720257	0.0106307	0.203662
ENSMUSG00000097620	0.63614	0.0206786	NA
ENSMUSG00000097632	0.380651	0.0390012	NA
ENSMUSG00000097804	0.721082	0.0110609	0.207321
ENSMUSG00000097852	0.38067	0.0389994	NA
ENSMUSG00000097944	0.454525	0.0406972	0.413793
ENSMUSG00000097993	0.797034	0.0049981	0.134964
ENSMUSG00000097994	0.910853	0.000590684	0.0319004
ENSMUSG00000098008	0.766071	0.00629651	0.153821
ENSMUSG00000098098	-0.448871	0.0228383	0.313941
ENSMUSG00000098112	0.455682	0.0108502	0.205701
ENSMUSG00000098132	0.671968	0.00245895	0.0870679
ENSMUSG00000098176	0.350295	0.0441101	0.431615
ENSMUSG00000098814	1.00815	0.000309152	0.0201669
ENSMUSG00000099021	0.750633	0.00209253	0.0780106
ENSMUSG00000099083	-0.898846	0.000467694	0.027195
ENSMUSG00000099250	0.465882	0.0471745	0.444168
ENSMUSG00000099397	-0.430574	0.0147841	0.245726
ENSMUSG00000099398	0.552549	0.0129483	NA
ENSMUSG00000099564	0.474571	0.0411577	0.41525
ENSMUSG00000099655	0.644441	0.00109178	0.0501448
ENSMUSG00000099974	0.600518	0.00403944	0.118592
ENSMUSG00000100094	-0.678239	0.0146357	0.244914
ENSMUSG00000100131	-0.457403	0.0399272	0.410783
ENSMUSG00000100162	-0.509547	0.0121578	NA
ENSMUSG00000100280	0.550121	0.0485551	0.448907
ENSMUSG00000100826	-0.527074	0.02149	0.304769
ENSMUSG00000100916	0.713877	0.000747063	0.0379724
ENSMUSG00000100969	-0.845038	3.03705e-06	0.000708646
ENSMUSG00000100987	-0.843051	0.00272289	0.0928025
ENSMUSG00000101133	-0.434038	0.0415838	NA
ENSMUSG00000101337	0.624867	0.00451849	0.128294
ENSMUSG00000101397	-0.409198	0.0383886	0.402166
ENSMUSG00000101431	0.447868	0.044267	0.431989
ENSMUSG00000101556	0.486235	0.0400691	NA
ENSMUSG00000101615	0.520774	0.0378473	NA
ENSMUSG00000101939	-0.48526	0.00793186	0.173329
ENSMUSG00000102037	0.513341	0.0166038	0.262075
ENSMUSG00000102049	0.402591	0.014238	0.241277
ENSMUSG00000102135	-0.533376	0.02001	NA
ENSMUSG00000102140	0.565905	0.0380833	0.400731
ENSMUSG00000102364	1.16359	3.27061e-05	0.00399497
ENSMUSG00000102418	0.538478	0.00814673	0.174847
ENSMUSG00000102425	-0.584244	0.0279366	0.348294
ENSMUSG00000102670	-0.371145	0.0396971	NA
ENSMUSG00000102697	-0.413403	0.0203085	0.294984
ENSMUSG00000102827	-0.670459	0.00622637	0.152918
ENSMUSG00000102942	0.648987	0.00498267	NA
ENSMUSG00000103254	0.819437	0.00188004	NA
ENSMUSG00000103271	1.33695	2.35797e-06	0.000596042
ENSMUSG00000103332	-3.31091	1.26454e-36	2.30146e-32
ENSMUSG00000103593	0.566709	0.0458041	0.438603
ENSMUSG00000103726	0.483082	0.0454988	NA
ENSMUSG00000103772	0.377918	0.0398077	NA
ENSMUSG00000103804	0.59847	0.0126933	NA
ENSMUSG00000103865	0.560721	0.0151315	0.248705
ENSMUSG00000103928	0.594634	0.0361671	0.391577
ENSMUSG00000104235	-0.687303	0.0124155	NA
ENSMUSG00000104422	0.674096	0.0169817	0.266235
ENSMUSG00000104801	-0.43068	0.0241769	NA
ENSMUSG00000104882	-0.561873	0.0406444	0.413793
ENSMUSG00000104913	-0.669358	0.0102113	0.20005
ENSMUSG00000104965	-0.576304	0.00738312	0.167109
ENSMUSG00000105061	-0.485827	0.0327278	0.375321
ENSMUSG00000105096	0.411635	0.0486151	0.448907
ENSMUSG00000105176	-0.744311	0.00432685	0.124143
ENSMUSG00000105606	1.66984	3.79154e-09	2.76024e-06
ENSMUSG00000105646	0.740702	0.00418839	0.121771
ENSMUSG00000105868	-0.647132	0.0224504	0.31146
ENSMUSG00000105928	-0.628728	0.0162845	0.259753
ENSMUSG00000106086	-0.544802	0.0414439	0.416728
ENSMUSG00000106106	0.636987	0.000837302	0.0410752
ENSMUSG00000106166	-0.593773	0.00765533	NA
ENSMUSG00000106926	-0.345952	0.047813	0.446136
ENSMUSG00000107035	0.70319	0.0079515	0.173329
ENSMUSG00000107225	0.517814	0.0493721	NA
ENSMUSG00000107412	0.509322	0.0198631	NA
ENSMUSG00000107478	0.536789	0.0166173	0.262075
ENSMUSG00000107872	0.683971	0.00744871	0.16778
ENSMUSG00000107951	-0.557665	0.0279213	0.348294
ENSMUSG00000108126	0.59722	0.0345019	0.384684
ENSMUSG00000108294	-0.572114	0.00224408	0.0816991
ENSMUSG00000108348	0.80499	0.00416869	NA
ENSMUSG00000108350	0.503103	0.0150471	0.248285
ENSMUSG00000108358	-0.447477	0.0071487	0.1649
ENSMUSG00000108487	1.49281	3.43461e-08	2.22068e-05
ENSMUSG00000108506	-0.564433	0.0147487	0.245588
ENSMUSG00000108815	-0.714347	0.00924568	0.188975
ENSMUSG00000108823	-0.600734	0.0318776	0.371591
ENSMUSG00000108841	0.627323	0.00716685	0.16511
ENSMUSG00000109178	-0.420036	0.0264554	NA
ENSMUSG00000109967	-0.687314	0.00350203	NA
ENSMUSG00000109975	-0.652845	0.00610909	0.151067
ENSMUSG00000110126	0.479487	0.028132	0.349252
ENSMUSG00000110170	0.787858	0.00367397	0.111847
ENSMUSG00000110194	-0.654802	0.0202253	NA
ENSMUSG00000110264	-0.683056	0.0161751	0.258891
ENSMUSG00000110266	0.61382	0.0275869	0.346024
ENSMUSG00000110350	-0.596432	0.0352746	0.388384
[truncated: 131 more rows]

## Sheet: c_vs_ACO
gene_ID	log2FoldChange	pvalue	padj
ENSMUSG00000000028	1.88254	9.04904e-24	8.99301e-22
ENSMUSG00000000031	-0.872679	0.0367277	0.139548
ENSMUSG00000000078	-0.479043	0.000363312	0.00317641
ENSMUSG00000000088	0.566624	0.0131202	0.0643099
ENSMUSG00000000094	-0.482101	0.00110652	0.00831737
ENSMUSG00000000120	1.59826	5.55105e-08	1.16647e-06
ENSMUSG00000000125	-1.32084	0.00881228	0.0467428
ENSMUSG00000000134	0.429242	0.00697983	0.038754
ENSMUSG00000000149	0.474238	0.0117374	0.0589043
ENSMUSG00000000159	-0.422131	0.00522138	0.0307014
ENSMUSG00000000171	0.323243	0.0498808	0.174133
ENSMUSG00000000182	5.49587	1.37381e-30	2.18849e-28
ENSMUSG00000000202	2.00273	6.12555e-05	0.00067229
ENSMUSG00000000204	1.15885	7.93515e-05	0.000844376
ENSMUSG00000000216	-0.835078	1.46205e-07	2.86654e-06
ENSMUSG00000000244	0.584984	0.00497614	0.0294799
ENSMUSG00000000247	2.47318	7.60799e-06	0.000104919
ENSMUSG00000000266	-0.789938	7.01559e-05	0.000756183
ENSMUSG00000000276	-0.454475	0.00663186	0.0371745
ENSMUSG00000000278	0.539688	0.000544818	0.00453806
ENSMUSG00000000282	0.561324	0.00318179	0.0202151
ENSMUSG00000000290	1.37162	5.85917e-15	2.81461e-13
ENSMUSG00000000308	0.759935	5.43563e-07	9.56645e-06
ENSMUSG00000000317	-0.699874	0.000543239	0.00453135
ENSMUSG00000000318	1.9259	4.66613e-11	1.49544e-09
ENSMUSG00000000320	-0.790194	0.000175111	0.00169744
ENSMUSG00000000325	-0.577257	0.000912171	0.0070278
ENSMUSG00000000340	-0.422303	0.0296888	0.119076
ENSMUSG00000000384	0.432717	0.00749343	0.0410366
ENSMUSG00000000386	2.48601	3.65042e-15	1.82027e-13
ENSMUSG00000000392	1.75915	1.46343e-06	2.34505e-05
ENSMUSG00000000409	0.90462	1.90575e-05	0.000241592
ENSMUSG00000000416	-0.896299	3.98314e-05	0.000462211
ENSMUSG00000000420	0.361453	0.0212659	0.0924103
ENSMUSG00000000440	0.549884	0.00194998	0.0135405
ENSMUSG00000000486	0.500051	0.0195861	0.0870428
ENSMUSG00000000489	-0.478385	0.00924543	0.0484898
ENSMUSG00000000530	-0.94396	0.000123532	0.00125237
ENSMUSG00000000538	-0.314327	0.0397768	0.147783
ENSMUSG00000000552	1.62321	4.67822e-09	1.13118e-07
ENSMUSG00000000562	1.01539	3.00851e-05	0.00035971
ENSMUSG00000000594	0.829429	3.92951e-06	5.76391e-05
ENSMUSG00000000617	1.8676	0.000151292	0.00149327
ENSMUSG00000000682	1.51308	2.33483e-11	7.73457e-10
ENSMUSG00000000791	1.70832	7.91746e-14	3.38996e-12
ENSMUSG00000000794	1.0179	0.000269708	0.00246653
ENSMUSG00000000805	-0.539536	0.0150069	0.0709261
ENSMUSG00000000811	-0.452652	0.0027457	0.017939
ENSMUSG00000000827	-0.379868	0.0474146	0.168321
ENSMUSG00000000861	1.40564	8.01147e-11	2.50459e-09
ENSMUSG00000000881	-0.383236	0.00729546	0.0402383
ENSMUSG00000000942	-0.587784	0.00731245	0.0402818
ENSMUSG00000000957	0.673795	3.35759e-05	0.000396632
ENSMUSG00000000958	0.488295	0.00853524	0.0455346
ENSMUSG00000000982	1.24574	0.00124848	0.00924095
ENSMUSG00000001020	1.62543	1.50404e-13	6.29056e-12
ENSMUSG00000001025	-0.850078	1.64382e-05	0.000211985
ENSMUSG00000001029	-0.773815	0.000481391	0.00408353
ENSMUSG00000001056	0.564776	0.00810964	0.0436944
ENSMUSG00000001095	1.15721	0.00463266	0.0277716
ENSMUSG00000001098	-0.420098	0.00733875	0.0403702
ENSMUSG00000001105	-0.584607	0.000223092	0.00209505
ENSMUSG00000001119	0.67832	6.7579e-05	0.000732049
ENSMUSG00000001128	2.76576	5.05746e-45	1.79623e-42
ENSMUSG00000001131	3.88185	6.30021e-89	1.13745e-85
ENSMUSG00000001158	-0.904825	3.24921e-07	5.98081e-06
ENSMUSG00000001175	0.418317	0.0265923	0.109842
ENSMUSG00000001225	-1.25427	0.0214467	0.0930216
ENSMUSG00000001228	3.15535	3.22599e-52	1.45606e-49
ENSMUSG00000001240	-0.665392	3.78976e-05	0.000442855
ENSMUSG00000001248	0.562096	0.000246691	0.00227913
ENSMUSG00000001281	0.509887	0.0291099	0.117333
ENSMUSG00000001289	-0.573088	0.00140219	0.0101975
ENSMUSG00000001300	-0.877698	7.81615e-07	1.32191e-05
ENSMUSG00000001305	-0.39624	0.0403432	0.149394
ENSMUSG00000001348	2.59033	1.32319e-31	2.34975e-29
ENSMUSG00000001366	-0.372163	0.0220375	0.0948626
ENSMUSG00000001403	3.07548	3.1757e-60	1.91115e-57
ENSMUSG00000001419	0.429698	0.0094943	0.0496007
ENSMUSG00000001444	0.675882	0.0431365	0.15712
ENSMUSG00000001473	1.44052	7.36363e-23	6.87642e-21
ENSMUSG00000001493	-0.490683	0.0177399	0.0807089
ENSMUSG00000001497	2.2428	4.817e-05	0.000546686
ENSMUSG00000001504	-0.791034	2.74848e-05	0.000331547
ENSMUSG00000001506	0.82278	1.96768e-05	0.000248136
ENSMUSG00000001507	-0.411795	0.0156918	0.0734735
ENSMUSG00000001517	1.38321	0.000304022	0.00273078
ENSMUSG00000001525	1.25086	4.34327e-05	0.000499188
ENSMUSG00000001542	0.570162	0.000351651	0.00309209
ENSMUSG00000001552	-0.414261	0.012696	0.0626273
ENSMUSG00000001576	-0.929743	0.00150496	0.0108647
ENSMUSG00000001588	0.884707	0.000377897	0.00329065
ENSMUSG00000001604	-0.751788	0.00424237	0.025854
ENSMUSG00000001627	-0.332843	0.0265735	0.109804
ENSMUSG00000001665	-0.419396	0.0122889	0.0610654
ENSMUSG00000001670	-1.51223	0.00582936	0.0335351
ENSMUSG00000001674	-0.412664	0.006212	0.0352311
ENSMUSG00000001687	-0.443585	0.000846028	0.00661227
ENSMUSG00000001700	0.365393	0.0305078	0.121543
ENSMUSG00000001739	-0.575378	0.0200802	0.0887289
ENSMUSG00000001750	1.31941	3.85676e-10	1.09082e-08
ENSMUSG00000001751	0.90497	5.20863e-07	9.22689e-06
ENSMUSG00000001763	0.845445	4.99046e-05	0.000562823
ENSMUSG00000001768	-0.381473	0.0153612	0.072332
ENSMUSG00000001794	-0.49637	0.000459323	0.00391626
ENSMUSG00000001864	0.800013	0.00128424	0.0094733
ENSMUSG00000001865	-0.691503	0.00160824	0.0114992
ENSMUSG00000001910	0.53645	0.00604341	0.0345281
ENSMUSG00000001943	-0.614112	0.000848	0.00662317
ENSMUSG00000001946	-0.782399	7.37251e-07	1.25275e-05
ENSMUSG00000001948	-0.934911	0.00664432	0.037225
ENSMUSG00000001985	-0.49544	0.0102168	0.0527871
ENSMUSG00000001995	-0.619103	0.000113064	0.0011538
ENSMUSG00000001999	0.402169	0.0275348	0.112725
ENSMUSG00000002014	0.414372	0.0134741	0.0655696
ENSMUSG00000002033	0.628125	0.00063161	0.00515981
ENSMUSG00000002055	3.01453	2.85363e-22	2.48289e-20
ENSMUSG00000002068	2.52796	5.9831e-19	4.20857e-17
ENSMUSG00000002083	0.429041	0.0301854	0.120703
ENSMUSG00000002102	-0.456764	0.011832	0.0592558
ENSMUSG00000002103	0.705144	1.49869e-05	0.000194425
ENSMUSG00000002107	0.40611	0.0449423	0.162279
ENSMUSG00000002111	1.63215	3.65482e-15	1.82027e-13
ENSMUSG00000002190	1.13175	0.0356288	0.136474
ENSMUSG00000002204	-0.426619	0.0351047	0.135112
ENSMUSG00000002228	0.791427	0.00539089	0.0314977
ENSMUSG00000002250	0.355421	0.0232794	0.098989
ENSMUSG00000002257	0.839738	0.000198408	0.00189278
ENSMUSG00000002297	1.3614	1.02993e-11	3.57013e-10
ENSMUSG00000002395	-0.458757	0.0358969	0.137189
ENSMUSG00000002455	-0.336033	0.0226128	0.0969152
ENSMUSG00000002458	0.769902	1.54878e-05	0.000200564
ENSMUSG00000002489	0.744008	0.00138766	0.0101089
ENSMUSG00000002504	-0.377506	0.0185844	0.0836043
ENSMUSG00000002565	4.63766	9.77739e-83	1.41218e-79
ENSMUSG00000002578	-1.04083	0.000131548	0.00132373
ENSMUSG00000002588	-2.57633	1.98411e-21	1.60996e-19
ENSMUSG00000002602	0.651588	0.000125901	0.0012746
ENSMUSG00000002603	0.718589	6.5045e-06	9.09508e-05
ENSMUSG00000002625	-0.444682	0.00190121	0.013281
ENSMUSG00000002633	0.547073	0.00310306	0.019837
ENSMUSG00000002668	0.532857	0.0203673	0.0896867
ENSMUSG00000002688	-0.721446	1.32553e-05	0.000173416
ENSMUSG00000002699	1.73083	8.37628e-23	7.7885e-21
ENSMUSG00000002732	-0.376878	0.029341	0.118001
ENSMUSG00000002769	-1.2602	0.000276031	0.00251587
ENSMUSG00000002771	0.642881	0.00100297	0.00761895
ENSMUSG00000002831	-0.909819	3.44452e-06	5.11134e-05
ENSMUSG00000002835	1.37465	1.24677e-16	7.20303e-15
ENSMUSG00000002870	1.36163	2.5303e-16	1.40562e-14
ENSMUSG00000002885	-0.323855	0.0185161	0.0833993
ENSMUSG00000002897	0.645048	0.000390993	0.00339378
ENSMUSG00000002900	-0.61585	2.14452e-05	0.000267632
ENSMUSG00000002910	-0.608206	0.0136721	0.0662022
ENSMUSG00000002944	-0.411837	0.0499888	0.174438
ENSMUSG00000002948	-1.27142	0.000201562	0.00192033
ENSMUSG00000002968	0.301365	0.0388676	0.145334
ENSMUSG00000002983	0.669109	0.00269274	0.0176515
ENSMUSG00000002985	0.512049	0.0145659	0.0693867
ENSMUSG00000002992	1.26969	0.0202947	0.0894749
ENSMUSG00000003051	0.441159	0.0170343	0.0782684
ENSMUSG00000003166	0.549627	0.0494668	0.17333
ENSMUSG00000003206	1.3327	1.74814e-08	3.92878e-07
ENSMUSG00000003228	-0.592865	0.000371745	0.0032436
ENSMUSG00000003234	-0.350715	0.0129579	0.0637018
ENSMUSG00000003235	-0.347196	0.0171514	0.0786396
ENSMUSG00000003309	-0.465564	0.0150397	0.0710035
ENSMUSG00000003348	0.508011	0.00201393	0.0138955
ENSMUSG00000003352	0.701756	7.78853e-05	0.000830405
ENSMUSG00000003354	-0.701102	0.0140636	0.0677085
ENSMUSG00000003363	1.15798	2.67089e-13	1.09592e-11
ENSMUSG00000003379	0.699643	0.0298627	0.119721
ENSMUSG00000003380	-0.492779	0.0141282	0.0679047
ENSMUSG00000003418	1.54883	4.51831e-13	1.81276e-11
ENSMUSG00000003420	0.703961	0.000620721	0.00508399
ENSMUSG00000003437	-0.330398	0.0178925	0.0812153
ENSMUSG00000003477	-1.36357	7.04058e-12	2.49647e-10
ENSMUSG00000003484	1.1254	0.00016056	0.00157257
ENSMUSG00000003518	-0.776682	0.00117553	0.00877896
ENSMUSG00000003526	-0.628917	0.0115859	0.0583198
ENSMUSG00000003531	-0.49033	0.0201495	0.0889805
ENSMUSG00000003545	-0.631751	0.0303793	0.121209
ENSMUSG00000003559	-0.532697	0.000264811	0.0024279
ENSMUSG00000003581	-0.348101	0.02111	0.0918923
ENSMUSG00000003617	0.815284	1.49475e-05	0.000194031
ENSMUSG00000003644	0.307473	0.0443943	0.160729
ENSMUSG00000003662	-0.39038	0.0458203	0.164435
ENSMUSG00000003680	0.313954	0.0347772	0.134161
ENSMUSG00000003746	0.893924	5.72365e-07	1.00083e-05
ENSMUSG00000003779	2.68029	1.21132e-14	5.5956e-13
ENSMUSG00000003812	0.446099	0.0153408	0.0722521
ENSMUSG00000003814	0.523531	0.00190287	0.0132858
ENSMUSG00000003824	1.28155	4.53599e-06	6.57339e-05
ENSMUSG00000003849	-0.896404	2.78524e-05	0.00033542
ENSMUSG00000003863	0.803908	0.0175569	0.0800778
ENSMUSG00000003882	0.977992	0.000299551	0.00269621
ENSMUSG00000004035	-1.00396	7.76962e-05	0.000828798
ENSMUSG00000004038	-1.51583	0.00577603	0.0332724
ENSMUSG00000004043	0.801919	1.83815e-07	3.53359e-06
ENSMUSG00000004044	-0.694636	1.48199e-05	0.000192605
ENSMUSG00000004054	0.38735	0.0279804	0.114128
ENSMUSG00000004071	-0.554089	0.000405621	0.00349415
ENSMUSG00000004085	-0.409014	0.0158691	0.0741277
ENSMUSG00000004096	-0.371892	0.0088758	0.0469583
ENSMUSG00000004098	0.700353	0.00779915	0.0422698
ENSMUSG00000004099	0.604806	3.32031e-05	0.000392442
ENSMUSG00000004105	-0.429171	0.0272242	0.111749
ENSMUSG00000004110	1.1007	0.000766953	0.00609539
ENSMUSG00000004207	1.33037	2.05839e-14	9.31004e-13
ENSMUSG00000004263	-0.497637	0.0390598	0.145927
ENSMUSG00000004266	0.975946	1.04821e-07	2.11447e-06
ENSMUSG00000004296	1.58815	0.0021152	0.0144972
ENSMUSG00000004317	1.00782	1.14825e-06	1.87609e-05
ENSMUSG00000004328	-0.876355	0.00624947	0.0353696
ENSMUSG00000004341	1.23631	0.0161369	NA
ENSMUSG00000004359	1.82053	2.68499e-08	5.88173e-07
ENSMUSG00000004360	-0.960991	0.00192783	0.0134242
ENSMUSG00000004394	-0.507731	0.000594464	0.00489326
ENSMUSG00000004446	1.00293	1.41933e-07	2.78547e-06
ENSMUSG00000004473	0.946502	9.50908e-05	0.000990453
ENSMUSG00000004552	0.640323	0.00241797	0.0161833
ENSMUSG00000004558	-1.31961	2.28809e-13	9.40635e-12
ENSMUSG00000004568	-0.567861	0.000719468	0.00577949
ENSMUSG00000004609	1.47126	1.655e-10	4.97303e-09
ENSMUSG00000004626	0.45606	0.0167931	0.0773926
ENSMUSG00000004631	-0.797516	2.09062e-06	3.25383e-05
ENSMUSG00000004642	0.461558	0.00207235	0.0142577
ENSMUSG00000004655	-0.674261	8.62829e-05	0.000907877
ENSMUSG00000004677	0.526598	0.000138986	0.00138635
ENSMUSG00000004698	1.61239	4.94487e-07	8.7812e-06
ENSMUSG00000004707	1.39003	7.18457e-10	1.95545e-08
ENSMUSG00000004730	2.4066	8.52974e-34	1.69538e-31
ENSMUSG00000004791	0.695307	0.000926273	0.00712631
ENSMUSG00000004814	3.58325	2.31562e-40	6.60105e-38
ENSMUSG00000004815	0.421464	0.0134341	0.0654263
ENSMUSG00000004837	-0.695389	6.71621e-05	0.000727898
ENSMUSG00000004864	0.922245	9.86755e-07	1.63566e-05
ENSMUSG00000004885	1.18569	0.028432	0.115374
ENSMUSG00000004892	-1.2051	2.33155e-05	0.000287169
ENSMUSG00000004902	0.827678	0.0306835	0.122041
ENSMUSG00000004933	3.33948	1.71204e-30	2.70739e-28
ENSMUSG00000004939	-0.992518	0.0403806	NA
ENSMUSG00000004951	-0.804464	1.94724e-05	0.000246275
ENSMUSG00000004952	1.33791	1.55062e-09	4.01844e-08
ENSMUSG00000004988	4.61482	6.96919e-26	7.98876e-24
ENSMUSG00000005054	1.00987	1.63087e-08	3.68049e-07
ENSMUSG00000005057	2.17773	2.41383e-24	2.49027e-22
ENSMUSG00000005087	1.46542	9.99988e-08	2.02285e-06
ENSMUSG00000005103	0.348459	0.0241146	0.101662
ENSMUSG00000005125	0.358058	0.0189696	0.0848773
ENSMUSG00000005142	0.878246	2.98325e-08	6.48266e-07
ENSMUSG00000005220	1.89276	6.51714e-10	1.78726e-08
ENSMUSG00000005233	2.45234	1.78233e-40	5.14856e-38
ENSMUSG00000005320	-0.6941	7.03273e-05	0.000757653
ENSMUSG00000005338	2.03241	5.35409e-13	2.12059e-11
ENSMUSG00000005360	-0.428757	0.0185847	0.0836043
ENSMUSG00000005410	1.80636	1.14348e-21	9.41956e-20
ENSMUSG00000005413	1.00322	1.67159e-05	0.000215309
ENSMUSG00000005417	-0.602932	7.14585e-05	0.000768693
ENSMUSG00000005442	0.818225	1.37998e-06	2.2212e-05
ENSMUSG00000005465	0.811151	7.45035e-05	0.000798278
ENSMUSG00000005470	2.74521	1.13516e-46	4.3146e-44
ENSMUSG00000005505	-0.350229	0.0350694	0.135048
ENSMUSG00000005533	-0.553272	0.00337891	0.0213175
ENSMUSG00000005540	1.2154	2.36253e-05	0.000290489
ENSMUSG00000005615	-0.724791	0.0376321	0.142013
ENSMUSG00000005621	-0.416325	0.0478354	0.169339
ENSMUSG00000005640	1.08321	0.0234057	0.0993503
ENSMUSG00000005667	1.79855	1.00636e-13	4.26669e-12
ENSMUSG00000005672	-0.5023	0.00276986	0.0180587
ENSMUSG00000005718	0.600871	0.0163603	0.0758987
ENSMUSG00000005800	1.16923	3.97767e-09	9.6936e-08
ENSMUSG00000005803	-0.412345	0.00620352	0.0352086
ENSMUSG00000005813	-0.44251	0.0291544	0.117439
ENSMUSG00000005824	1.02875	4.60054e-05	0.000524858
ENSMUSG00000005881	-0.404398	0.028155	0.114625
ENSMUSG00000005882	-0.401247	0.021406	0.0928714
ENSMUSG00000005917	1.09431	0.0230063	0.0981046
ENSMUSG00000005947	0.983363	0.000118322	0.00120462
ENSMUSG00000005968	-0.866151	0.000197609	0.00188765
ENSMUSG00000005973	-0.290397	0.047762	0.169167
ENSMUSG00000006057	-0.905471	0.0073861	0.040573
ENSMUSG00000006058	-0.35786	0.048907	0.171896
ENSMUSG00000006127	-0.56195	9.37124e-05	0.000977505
ENSMUSG00000006205	-0.595829	0.00104548	0.00790038
ENSMUSG00000006221	-0.822624	0.0172425	0.0789429
ENSMUSG00000006269	1.40759	0.000186225	0.00178917
ENSMUSG00000006273	0.496545	0.000296099	0.00266736
ENSMUSG00000006276	0.300551	0.0292534	0.117736
ENSMUSG00000006281	1.03209	2.2958e-12	8.63517e-11
ENSMUSG00000006301	-0.390442	0.00912268	0.048024
ENSMUSG00000006310	0.919038	2.34025e-05	0.000288077
ENSMUSG00000006313	-2.26492	2.2503e-14	1.00937e-12
ENSMUSG00000006335	-0.726031	0.00539843	0.0315248
ENSMUSG00000006344	0.939487	1.26044e-07	2.49875e-06
ENSMUSG00000006345	-1.06617	0.000344103	0.00303665
ENSMUSG00000006356	-0.637339	0.000696767	0.00562424
ENSMUSG00000006369	-0.465447	0.00100925	0.00765574
ENSMUSG00000006373	-0.764562	9.70648e-08	1.96717e-06
ENSMUSG00000006386	-0.925147	1.65949e-09	4.29543e-08
ENSMUSG00000006398	2.6231	7.24887e-35	1.53967e-32
ENSMUSG00000006403	1.74895	2.97087e-05	0.000355405
ENSMUSG00000006412	-0.342909	0.0495511	0.173509
ENSMUSG00000006442	0.547767	0.00181801	0.0127763
ENSMUSG00000006445	-0.621693	3.7762e-05	0.000441678
ENSMUSG00000006456	0.720365	0.00440525	0.0266964
ENSMUSG00000006464	-0.393979	0.0102702	0.053015
ENSMUSG00000006476	0.421141	0.010325	0.0532089
ENSMUSG00000006494	-0.460633	0.00746363	0.0409263
ENSMUSG00000006517	0.728019	4.16526e-06	6.09321e-05
ENSMUSG00000006519	1.06504	2.02372e-09	5.17027e-08
ENSMUSG00000006526	-0.350741	0.0274962	0.112588
ENSMUSG00000006542	-1.40557	1.73854e-10	5.20959e-09
ENSMUSG00000006567	-0.444083	0.00441032	0.0267197
ENSMUSG00000006574	-2.17551	1.29538e-10	3.94163e-09
ENSMUSG00000006585	1.74752	1.08768e-22	9.94287e-21
ENSMUSG00000006589	0.647053	0.0001361	0.00136195
ENSMUSG00000006611	0.340543	0.0443102	0.160451
ENSMUSG00000006638	-0.616697	0.0135938	0.06593
ENSMUSG00000006651	-0.737057	0.000242698	0.00224703
ENSMUSG00000006675	-0.902763	2.74824e-05	0.000331547
ENSMUSG00000006678	0.924977	1.13505e-06	1.85732e-05
ENSMUSG00000006715	0.781934	1.25735e-05	0.000165595
ENSMUSG00000006717	-0.536454	0.0308929	0.122739
ENSMUSG00000006731	1.08283	7.39369e-09	1.7336e-07
ENSMUSG00000006777	-0.342787	0.0355984	0.136461
ENSMUSG00000006782	0.409378	0.0368912	0.139998
ENSMUSG00000006800	1.54588	6.95611e-27	8.32619e-25
ENSMUSG00000006920	-0.490345	0.000410413	0.00352841
ENSMUSG00000006931	-0.438112	0.0307455	0.122257
ENSMUSG00000006941	-0.471809	0.00598795	0.0342773
ENSMUSG00000006948	1.71075	0.00189299	0.0132381
ENSMUSG00000007029	0.576502	0.00136627	0.0099731
ENSMUSG00000007034	0.529531	0.00516318	0.0303803
ENSMUSG00000007038	0.437688	0.00782898	0.0424037
ENSMUSG00000007039	-0.42802	0.0414309	0.152368
ENSMUSG00000007050	0.704998	0.000385889	0.0033535
ENSMUSG00000007080	2.38196	1.07715e-36	2.56445e-34
ENSMUSG00000007097	-0.389557	0.0128749	0.0633801
ENSMUSG00000007107	-1.02495	1.15003e-05	0.000152762
ENSMUSG00000007122	-0.884555	0.00284446	0.0184397
ENSMUSG00000007279	-1.05772	1.12381e-09	2.95119e-08
ENSMUSG00000007338	-0.323769	0.046725	0.166705
ENSMUSG00000007415	-0.390906	0.0118312	0.0592558
ENSMUSG00000007613	0.927503	5.53115e-06	7.84756e-05
ENSMUSG00000007646	0.699992	0.012586	0.0622262
ENSMUSG00000007659	-0.863245	0.00272779	0.0178381
ENSMUSG00000007670	0.406625	0.00571495	0.0329732
ENSMUSG00000007682	1.36419	2.46526e-06	3.7799e-05
ENSMUSG00000007817	0.524914	0.000324232	0.00288125
ENSMUSG00000007833	0.715391	2.0719e-05	0.000259467
ENSMUSG00000007867	-0.684784	0.000896888	0.00694215
ENSMUSG00000007872	-0.647792	0.000315948	0.00281992
ENSMUSG00000007877	-1.77684	0.000757969	0.0060395
ENSMUSG00000007908	-0.452366	0.020549	0.0901932
ENSMUSG00000007946	1.38946	0.0117803	0.0590925
ENSMUSG00000008129	-0.732496	0.00853352	0.0455346
ENSMUSG00000008193	1.22986	3.15327e-05	0.000375773
ENSMUSG00000008206	-0.904536	2.10882e-06	3.27509e-05
ENSMUSG00000008226	-0.696888	0.00197659	0.0136858
ENSMUSG00000008305	-0.593708	6.55612e-05	0.000713761
ENSMUSG00000008318	1.63805	8.81856e-10	2.35579e-08
ENSMUSG00000008348	-1.13358	5.44865e-05	0.000606603
ENSMUSG00000008384	-0.626187	0.00361896	0.0226081
ENSMUSG00000008461	1.18606	0.0302208	0.120799
ENSMUSG00000008475	0.418186	0.00353903	0.0222176
ENSMUSG00000008575	-0.474359	0.00109268	0.00822261
ENSMUSG00000008845	2.83557	6.6566e-26	7.67103e-24
ENSMUSG00000008999	-1.20047	1.76193e-07	3.39611e-06
ENSMUSG00000009090	0.442344	0.00285477	0.0184788
ENSMUSG00000009092	1.0683	0.000216132	0.00203853
ENSMUSG00000009185	8.29772	6.52815e-292	1.41432e-287
ENSMUSG00000009214	2.41242	3.15725e-08	6.82654e-07
ENSMUSG00000009281	-0.782336	0.000242657	0.00224703
ENSMUSG00000009292	0.956051	7.68776e-06	0.000105845
ENSMUSG00000009549	-0.472385	0.00463724	0.0277914
ENSMUSG00000009563	0.468891	0.0177269	0.0806833
ENSMUSG00000009630	-0.383477	0.0125912	0.0622376
ENSMUSG00000009633	-0.859097	3.90207e-06	5.72753e-05
ENSMUSG00000009640	-0.399513	0.0230449	0.098223
ENSMUSG00000009687	0.942654	1.9017e-09	4.87578e-08
ENSMUSG00000009731	1.45956	6.30637e-08	1.3112e-06
ENSMUSG00000009772	0.418026	0.0200757	0.0887271
ENSMUSG00000009876	-0.727668	0.00028418	0.00257825
ENSMUSG00000009894	-0.358199	0.0453723	0.163396
ENSMUSG00000009905	-0.35956	0.0228634	0.0977187
ENSMUSG00000010021	0.501199	0.0351954	0.135317
ENSMUSG00000010025	-0.346162	0.0311908	0.123605
ENSMUSG00000010048	0.350025	0.0394272	0.146945
ENSMUSG00000010054	-0.369679	0.039788	0.147783
ENSMUSG00000010067	-0.562582	0.00556167	0.0322693
ENSMUSG00000010095	-0.648421	0.000211672	0.00200344
ENSMUSG00000010122	-2.11577	2.41607e-10	7.02606e-09
ENSMUSG00000010142	1.19775	1.69363e-06	2.68612e-05
ENSMUSG00000010175	0.737367	0.00714847	0.0395484
ENSMUSG00000010307	1.38737	1.4513e-12	5.56501e-11
ENSMUSG00000010358	-0.374385	0.0469303	0.167017
ENSMUSG00000010362	-0.655497	0.00599597	0.0343113
ENSMUSG00000010453	-0.296873	0.0283428	0.115206
ENSMUSG00000010651	-0.865577	0.000382383	0.00332704
ENSMUSG00000010796	-1.02606	0.0378849	0.142694
ENSMUSG00000010797	-0.942814	5.78961e-05	0.000640286
ENSMUSG00000010825	1.33752	0.0103764	NA
ENSMUSG00000010830	0.680338	0.0136128	0.0659929
ENSMUSG00000010936	0.557873	0.000231071	0.00215319
ENSMUSG00000011008	2.9955	2.2976e-38	5.9259e-36
ENSMUSG00000011034	2.48112	2.32097e-27	2.87336e-25
ENSMUSG00000011154	-0.800837	0.00475837	0.0283981
ENSMUSG00000011171	-0.907753	4.18822e-05	0.000483677
ENSMUSG00000011256	0.826825	7.55226e-07	1.28128e-05
ENSMUSG00000011257	0.396886	0.0271737	0.111605
ENSMUSG00000011263	0.559641	0.0172715	0.0790426
ENSMUSG00000011267	0.665882	0.018136	0.0820801
ENSMUSG00000011382	-0.321005	0.0381244	0.143348
ENSMUSG00000011427	-0.399615	0.0321466	0.126513
ENSMUSG00000011752	0.430162	0.0015373	0.011065
ENSMUSG00000012114	0.506397	0.000730774	0.00585079
ENSMUSG00000012350	0.57372	0.0101387	0.0524489
ENSMUSG00000012428	2.19741	3.20995e-23	3.0636e-21
ENSMUSG00000012443	3.12996	5.41335e-35	1.16817e-32
ENSMUSG00000012519	0.322881	0.0498052	0.173953
ENSMUSG00000012889	2.13669	3.12436e-13	1.27957e-11
ENSMUSG00000013076	-0.571594	0.00236101	0.0158756
ENSMUSG00000013155	0.530759	0.02965	0.118979
ENSMUSG00000013275	0.396387	0.011766	0.0590346
ENSMUSG00000013338	1.14806	0.0214837	0.0931368
ENSMUSG00000013367	1.50084	0.000127141	0.00128475
ENSMUSG00000013415	-0.76073	0.0158298	0.0740079
ENSMUSG00000013483	-0.778488	0.00728598	0.0402065
ENSMUSG00000013611	-2.4356	8.59895e-06	0.000117389
ENSMUSG00000013622	-0.407661	0.0212717	0.0924103
ENSMUSG00000013701	0.636313	0.000523648	0.00439212
ENSMUSG00000013707	1.39774	1.81993e-09	4.68275e-08
ENSMUSG00000013766	0.881607	0.0382606	0.143635
ENSMUSG00000013878	-1.07855	0.0401443	0.148798
ENSMUSG00000013974	0.853027	6.17919e-06	8.67048e-05
ENSMUSG00000014030	0.791776	0.00806793	0.0434913
ENSMUSG00000014158	1.96483	3.21614e-13	1.31467e-11
ENSMUSG00000014232	-0.416522	0.0114028	0.0575588
ENSMUSG00000014303	0.355962	0.0334763	0.130443
ENSMUSG00000014361	-0.49465	0.0121913	0.0607043
ENSMUSG00000014444	0.357566	0.0124148	0.0615345
ENSMUSG00000014453	0.969349	0.00323558	0.0204967
ENSMUSG00000014496	-0.442151	0.0383246	0.143825
ENSMUSG00000014498	0.646697	8.88408e-06	0.000120976
ENSMUSG00000014547	1.26853	3.27878e-05	0.000388381
ENSMUSG00000014554	-0.450182	0.00776713	0.0421425
ENSMUSG00000014599	0.504311	0.00261978	0.0172673
ENSMUSG00000014602	0.555444	0.031185	0.123604
ENSMUSG00000014668	0.420971	0.0114501	0.0577707
ENSMUSG00000014776	-0.429603	0.0171213	0.0785374
ENSMUSG00000014778	-0.458303	0.00167383	0.0119014
ENSMUSG00000014813	-1.55224	1.17793e-14	5.45295e-13
ENSMUSG00000014846	-1.02835	1.29276e-09	3.38257e-08
ENSMUSG00000014867	0.33118	0.0155382	0.0729751
ENSMUSG00000014905	0.375714	0.0151868	0.0716355
ENSMUSG00000014932	-0.546929	0.0186441	0.0837842
ENSMUSG00000015027	1.14681	5.04542e-12	1.81879e-10
ENSMUSG00000015053	-0.745586	7.48094e-06	0.000103232
ENSMUSG00000015083	0.788074	0.0344551	0.133274
ENSMUSG00000015093	-0.930725	3.42594e-07	6.24774e-06
ENSMUSG00000015112	0.640702	0.000240763	0.00223293
ENSMUSG00000015134	3.61467	1.79075e-35	3.99965e-33
ENSMUSG00000015224	-0.987022	2.39975e-07	4.54464e-06
ENSMUSG00000015243	0.474917	0.0284001	0.115309
ENSMUSG00000015247	0.412451	0.0074945	0.0410366
ENSMUSG00000015312	-0.427441	0.0175839	0.080184
ENSMUSG00000015314	1.69413	6.34502e-16	3.36923e-14
ENSMUSG00000015316	0.587052	0.00753352	0.041226
ENSMUSG00000015340	1.65961	1.23419e-18	8.43495e-17
ENSMUSG00000015354	-1.45316	9.92482e-18	6.25062e-16
ENSMUSG00000015355	1.33145	4.45919e-15	2.18571e-13
ENSMUSG00000015396	1.9114	6.26924e-31	1.03682e-28
ENSMUSG00000015405	-0.763316	0.00061833	0.00506853
ENSMUSG00000015437	0.581692	0.0463761	0.165798
ENSMUSG00000015451	1.00513	0.0208142	0.0910092
ENSMUSG00000015452	-0.709697	5.61069e-06	7.95521e-05
ENSMUSG00000015467	-0.937563	0.0301572	0.12062
ENSMUSG00000015476	0.841746	0.0410463	0.151339
ENSMUSG00000015488	-0.357791	0.0235941	0.0999153
ENSMUSG00000015536	-0.338949	0.0345427	0.133542
ENSMUSG00000015542	-0.531811	0.00499093	0.0295514
ENSMUSG00000015568	0.785944	0.00200515	0.0138525
ENSMUSG00000015599	1.18168	0.028042	0.114262
ENSMUSG00000015652	1.00722	0.0166989	0.0771362
ENSMUSG00000015665	1.78626	0.00101712	0.00770489
ENSMUSG00000015702	-0.434558	0.0304282	0.121315
ENSMUSG00000015709	1.71966	4.1205e-12	1.50287e-10
ENSMUSG00000015733	0.3889	0.017047	0.0782964
ENSMUSG00000015745	0.734627	2.37848e-05	0.000292285
ENSMUSG00000015766	0.778266	1.0312e-06	1.70022e-05
ENSMUSG00000015790	-0.432321	0.00621824	0.0352397
ENSMUSG00000015852	1.30578	3.16835e-12	1.17137e-10
ENSMUSG00000015854	3.77222	4.46784e-18	2.93321e-16
ENSMUSG00000015880	3.206	7.17595e-28	9.14511e-26
ENSMUSG00000015943	-0.960316	0.0104605	0.0538305
ENSMUSG00000015947	1.68545	1.30416e-17	8.16606e-16
ENSMUSG00000015950	1.99755	1.00175e-23	9.91005e-22
ENSMUSG00000015966	1.2347	0.00119583	0.00889152
ENSMUSG00000015971	-0.488048	0.00517946	0.0304678
ENSMUSG00000015981	-0.769087	3.01714e-05	0.000360542
ENSMUSG00000015994	-0.408773	0.00285214	0.0184673
ENSMUSG00000016024	0.509396	0.00129587	0.00953956
ENSMUSG00000016028	0.956891	4.03453e-10	1.13517e-08
ENSMUSG00000016087	-0.746358	0.0155695	0.0731064
ENSMUSG00000016128	-0.344351	0.0177683	0.080821
ENSMUSG00000016179	1.46167	0.000211886	0.00200371
ENSMUSG00000016194	-0.908884	3.86448e-10	1.09158e-08
ENSMUSG00000016256	1.34692	1.77586e-15	9.16046e-14
ENSMUSG00000016283	2.31699	1.05992e-07	2.1361e-06
ENSMUSG00000016319	0.341198	0.0268671	0.110724
ENSMUSG00000016349	-1.23546	0.0248987	0.104238
ENSMUSG00000016386	-0.695946	0.0132901	0.0649224
ENSMUSG00000016477	0.656532	0.00206084	0.014201
ENSMUSG00000016487	-0.512387	0.000735822	0.00588033
ENSMUSG00000016495	0.482157	0.0185572	0.0835326
ENSMUSG00000016496	1.32368	7.67376e-15	3.6379e-13
ENSMUSG00000016498	4.66147	5.93534e-71	4.59247e-68
ENSMUSG00000016520	-0.597802	0.0105521	0.0541991
ENSMUSG00000016529	3.61179	2.32714e-12	8.73785e-11
ENSMUSG00000016541	-0.338069	0.0211399	0.0919853
ENSMUSG00000016552	0.723356	0.0056468	0.0326757
ENSMUSG00000016624	0.828703	0.00431892	0.0262467
ENSMUSG00000016637	-0.330132	0.0454608	0.163524
ENSMUSG00000016756	1.01689	0.00429992	0.0261532
ENSMUSG00000016763	-0.39418	0.0287016	0.116206
ENSMUSG00000016918	-0.331856	0.0495744	0.173539
ENSMUSG00000016933	-0.449772	0.000956215	0.00731253
ENSMUSG00000016940	-0.729909	0.000187697	0.00180171
ENSMUSG00000017002	1.24031	4.52332e-07	8.08563e-06
ENSMUSG00000017007	0.643258	0.000278042	0.00253312
ENSMUSG00000017057	0.400614	0.0283761	0.115283
ENSMUSG00000017132	0.443076	0.0032278	0.0204534
ENSMUSG00000017146	2.5139	1.1592e-21	9.51292e-20
ENSMUSG00000017264	-0.316235	0.0496811	0.173716
ENSMUSG00000017344	-1.03878	1.9449e-07	3.72888e-06
ENSMUSG00000017400	2.4932	1.43397e-18	9.70845e-17
ENSMUSG00000017446	0.33304	0.0428741	0.156401
ENSMUSG00000017491	-0.702145	0.00134233	0.00982487
ENSMUSG00000017493	0.725599	0.00623964	0.0353324
ENSMUSG00000017499	2.66636	5.55065e-20	4.16107e-18
ENSMUSG00000017550	1.42692	1.00537e-10	3.10274e-09
ENSMUSG00000017607	1.61513	1.51127e-07	2.94704e-06
ENSMUSG00000017615	-0.466318	0.0373071	0.141033
ENSMUSG00000017639	0.477925	0.00435063	0.026395
ENSMUSG00000017652	0.567266	0.00266255	0.01748
ENSMUSG00000017664	0.335838	0.0469317	0.167017
ENSMUSG00000017667	-0.540746	0.00522201	0.0307014
ENSMUSG00000017697	1.34983	5.757e-12	2.05818e-10
ENSMUSG00000017713	0.444027	0.0130946	0.0642279
ENSMUSG00000017716	3.00556	2.05294e-25	2.25772e-23
ENSMUSG00000017718	0.99131	0.000950697	0.00727547
ENSMUSG00000017724	1.12659	0.00497411	0.0294759
ENSMUSG00000017734	-0.69526	0.013101	0.0642447
ENSMUSG00000017760	0.734131	1.2061e-06	1.96025e-05
ENSMUSG00000017774	-0.330736	0.0301592	0.12062
ENSMUSG00000017776	-0.654233	0.0187061	0.0839757
ENSMUSG00000017801	-0.464284	0.0262134	0.108712
ENSMUSG00000017830	0.630209	0.00414497	0.0253818
ENSMUSG00000017837	-0.975633	3.20976e-06	4.80163e-05
ENSMUSG00000017861	2.22192	4.97349e-18	3.23576e-16
ENSMUSG00000017929	0.95157	1.38949e-09	3.60951e-08
ENSMUSG00000017969	-0.549067	0.000157911	0.00155013
ENSMUSG00000017978	-0.516776	0.0013454	0.00984402
ENSMUSG00000018001	-0.590979	0.000454497	0.0038797
ENSMUSG00000018008	1.81335	2.35948e-22	2.07797e-20
ENSMUSG00000018040	-0.683234	0.0142643	0.0683555
ENSMUSG00000018143	-0.498323	0.00342423	0.0215594
ENSMUSG00000018168	1.19825	1.08467e-09	2.85187e-08
ENSMUSG00000018171	0.658818	0.000129134	0.00130125
ENSMUSG00000018217	-0.741724	3.08372e-05	0.000367889
ENSMUSG00000018239	-0.449743	0.00855357	0.0456205
ENSMUSG00000018263	-0.463535	0.00469084	0.0280815
ENSMUSG00000018339	-1.06581	0.000766126	0.00609105
ENSMUSG00000018340	-0.303801	0.0368865	0.139998
ENSMUSG00000018341	0.678555	0.032205	0.126628
ENSMUSG00000018362	0.889789	0.0141484	0.0679656
ENSMUSG00000018363	-0.34353	0.0326748	0.128034
ENSMUSG00000018377	-0.407794	0.0151918	0.0716436
ENSMUSG00000018411	-0.965539	2.06672e-09	5.27391e-08
ENSMUSG00000018415	-0.963688	6.71235e-09	1.59106e-07
ENSMUSG00000018417	-0.565074	0.000853873	0.00665198
ENSMUSG00000018451	-1.12513	3.88432e-06	5.70534e-05
ENSMUSG00000018459	2.16171	1.40102e-06	2.25171e-05
ENSMUSG00000018486	2.09531	1.07173e-05	0.000143327
ENSMUSG00000018500	0.681954	2.41515e-05	0.000296286
ENSMUSG00000018507	0.92234	5.37311e-06	7.64336e-05
ENSMUSG00000018554	3.37079	6.31305e-13	2.48677e-11
ENSMUSG00000018559	0.405768	0.0113003	0.0571209
ENSMUSG00000018565	-0.445722	0.00544305	0.0317255
ENSMUSG00000018574	-0.467406	0.0139277	0.0671885
ENSMUSG00000018585	0.446851	0.0147003	0.0697816
ENSMUSG00000018604	-0.489106	0.00298163	0.0191569
ENSMUSG00000018654	1.28336	6.14337e-07	1.06733e-05
ENSMUSG00000018672	-0.527612	0.00209393	0.0143833
ENSMUSG00000018774	2.21237	5.15865e-34	1.04451e-31
ENSMUSG00000018800	-0.507597	0.00798441	0.0431277
ENSMUSG00000018820	-0.405105	0.0419728	0.153917
ENSMUSG00000018822	-0.994385	0.0311768	0.123595
ENSMUSG00000018845	-0.716694	6.68336e-06	9.29961e-05
ENSMUSG00000018849	-0.767262	3.59609e-07	6.54149e-06
ENSMUSG00000018861	0.606723	0.00800213	0.0431978
ENSMUSG00000018893	-1.42585	0.0084171	0.045004
ENSMUSG00000018900	-0.439431	0.0475903	0.168747
ENSMUSG00000018906	-0.753772	0.00017768	0.0017185
ENSMUSG00000018907	3.77977	2.32609e-15	1.18576e-13
ENSMUSG00000018909	0.415657	0.0439692	0.15943
ENSMUSG00000018916	0.703927	0.0252612	0.105572
ENSMUSG00000018919	2.80279	2.16881e-10	6.39281e-09
ENSMUSG00000018920	0.84856	8.94722e-08	1.82525e-06
ENSMUSG00000018924	1.83211	1.08081e-12	4.19639e-11
ENSMUSG00000018927	2.38236	1.18288e-44	4.13341e-42
ENSMUSG00000018930	1.632	9.86476e-06	0.000133325
ENSMUSG00000018931	0.438589	0.026936	0.110924
ENSMUSG00000018986	0.671073	0.0264878	0.109619
ENSMUSG00000019055	0.38179	0.00904171	0.0476615
ENSMUSG00000019066	0.459582	0.032611	0.127888
ENSMUSG00000019088	0.676815	0.000229316	0.00213867
ENSMUSG00000019102	-0.851122	0.00031427	0.00281001
ENSMUSG00000019122	3.57947	1.40052e-62	9.48196e-60
ENSMUSG00000019124	-0.732189	1.71922e-05	0.000220787
ENSMUSG00000019139	0.462164	0.00208496	0.0143263
ENSMUSG00000019194	0.547876	0.00676194	0.0378058
ENSMUSG00000019210	-0.372334	0.0128459	0.0632515
ENSMUSG00000019214	1.96374	2.03962e-24	2.1347e-22
ENSMUSG00000019261	0.299793	0.0469329	0.167017
ENSMUSG00000019278	-1.31052	1.1301e-14	5.25397e-13
ENSMUSG00000019302	0.378829	0.0154251	0.0725698
ENSMUSG00000019320	1.28594	1.8773e-10	5.58351e-09
ENSMUSG00000019326	0.56904	0.00744837	0.0408618
ENSMUSG00000019359	-2.07354	2.45201e-07	4.63145e-06
ENSMUSG00000019368	-0.712229	1.84841e-06	2.90609e-05
ENSMUSG00000019433	0.384456	0.0387779	0.145074
ENSMUSG00000019467	-0.429374	0.00837512	0.0448349
ENSMUSG00000019487	-0.425108	0.00551196	0.0320494
ENSMUSG00000019539	0.407758	0.0247588	0.103841
ENSMUSG00000019564	0.915059	2.3819e-07	4.51873e-06
ENSMUSG00000019577	-1.48828	1.5664e-14	7.15951e-13
ENSMUSG00000019590	-0.343804	0.0185059	0.0833709
ENSMUSG00000019647	-0.66572	0.00375788	0.0233681
ENSMUSG00000019699	-0.301617	0.0469308	0.167017
ENSMUSG00000019715	-0.305092	0.0393547	0.14675
ENSMUSG00000019726	0.644217	0.000167397	0.00162923
ENSMUSG00000019732	-1.02623	6.32627e-05	0.000692216
ENSMUSG00000019737	0.676125	0.0382587	0.143635
ENSMUSG00000019762	-1.80812	7.17892e-17	4.27284e-15
ENSMUSG00000019768	0.728366	0.00169229	0.012005
ENSMUSG00000019773	1.54375	8.95438e-17	5.22902e-15
ENSMUSG00000019795	-0.330196	0.044566	0.161162
ENSMUSG00000019796	-0.634525	0.0342498	0.132693
ENSMUSG00000019817	-0.765098	7.41618e-05	0.00079501
ENSMUSG00000019820	-0.656124	0.000593562	0.00489326
ENSMUSG00000019832	1.33112	1.14535e-12	4.43107e-11
ENSMUSG00000019838	0.421497	0.0204303	0.0898545
ENSMUSG00000019845	1.34743	2.80088e-07	5.2447e-06
ENSMUSG00000019848	-0.647742	0.00256455	0.0169963
ENSMUSG00000019850	0.959859	0.000594181	0.00489326
ENSMUSG00000019852	0.951576	2.1516e-05	0.000268053
ENSMUSG00000019853	1.33596	3.08709e-08	6.68818e-07
ENSMUSG00000019866	0.908588	6.74576e-07	1.15898e-05
ENSMUSG00000019876	1.22393	0.00127613	0.00941985
ENSMUSG00000019889	-0.550085	0.000917023	0.00706017
ENSMUSG00000019891	-0.612242	0.000118097	0.00120291
ENSMUSG00000019893	0.584766	0.00769777	0.0418815
ENSMUSG00000019894	-0.583054	0.0135109	0.0656601
ENSMUSG00000019899	-0.523931	0.00533689	0.0312412
ENSMUSG00000019905	-0.519027	0.0414011	0.152362
ENSMUSG00000019909	-0.461719	0.0493063	0.172879
ENSMUSG00000019920	-0.506335	0.0436726	0.158646
ENSMUSG00000019942	2.83637	7.14208e-27	8.50182e-25
ENSMUSG00000019943	-0.50883	0.011674	0.0586681
ENSMUSG00000019944	-0.359746	0.0377012	0.1422
ENSMUSG00000019945	-0.669192	0.020286	0.0894715
ENSMUSG00000019960	-0.563151	0.00364689	0.0227628
ENSMUSG00000019966	-0.567626	0.010611	0.0544884
ENSMUSG00000019970	-0.430505	0.00822197	0.0441694
ENSMUSG00000019978	-0.49042	0.0174524	0.0796518
ENSMUSG00000019979	-0.295241	0.0455631	0.163757
ENSMUSG00000019982	0.452474	0.00695606	0.0386715
ENSMUSG00000019987	5.69759	1.00332e-87	1.67207e-84
ENSMUSG00000019989	0.534963	0.0205636	0.0902392
ENSMUSG00000019992	1.08313	0.0428709	0.156401
ENSMUSG00000019996	-0.352632	0.0213856	0.0928496
ENSMUSG00000019997	-0.629885	0.00261642	0.0172556
ENSMUSG00000020000	2.47071	3.66374e-09	8.98922e-08
ENSMUSG00000020009	-0.74492	8.75564e-05	0.0009186
ENSMUSG00000020010	1.57	1.06171e-07	2.13774e-06
ENSMUSG00000020017	4.42291	3.1009e-61	2.03579e-58
ENSMUSG00000020019	-0.852573	2.59523e-09	6.54548e-08
ENSMUSG00000020023	-1.04675	1.49299e-07	2.91928e-06
ENSMUSG00000020044	-0.575118	0.0023259	0.0156736
ENSMUSG00000020053	2.46063	1.67478e-31	2.94993e-29
ENSMUSG00000020059	-0.679128	0.0258589	0.107468
ENSMUSG00000020067	-1.53662	0.000454238	0.00387902
ENSMUSG00000020072	0.754717	0.000106183	0.00109026
ENSMUSG00000020083	-0.496934	0.0233505	0.0991875
ENSMUSG00000020086	-0.5574	0.00673582	0.0376986
ENSMUSG00000020089	0.448538	0.0198943	0.088159
ENSMUSG00000020096	-1.24549	0.00391735	0.0241724
ENSMUSG00000020097	0.961203	0.00404389	0.0248683
ENSMUSG00000020100	1.19518	7.6202e-14	3.26914e-12
ENSMUSG00000020101	-0.64624	0.00747243	0.0409434
ENSMUSG00000020107	-0.486239	0.00357991	0.0224159
ENSMUSG00000020108	-0.696453	0.016587	0.0767367
ENSMUSG00000020120	1.67484	2.77673e-10	7.99971e-09
ENSMUSG00000020134	-0.297079	0.0472402	0.167863
ENSMUSG00000020143	1.22799	1.13681e-11	3.91556e-10
ENSMUSG00000020152	0.356655	0.0174709	0.0797192
ENSMUSG00000020154	-0.719477	0.000106294	0.00109089
ENSMUSG00000020160	-0.851692	2.18333e-07	4.1639e-06
ENSMUSG00000020169	-0.698168	0.0014188	0.0103114
ENSMUSG00000020173	-0.532605	0.000235033	0.00218634
ENSMUSG00000020178	0.464408	0.0312776	0.123813
ENSMUSG00000020182	-1.07654	3.32601e-06	4.94903e-05
ENSMUSG00000020183	-0.450051	0.0433769	0.157816
ENSMUSG00000020185	3.018	4.6116e-33	8.76405e-31
ENSMUSG00000020196	0.354597	0.013523	0.0656894
ENSMUSG00000020218	-0.701668	0.000458084	0.00390724
ENSMUSG00000020224	-0.391461	0.0187547	0.0841588
ENSMUSG00000020227	0.470077	0.0127346	0.0627605
ENSMUSG00000020228	0.77959	4.85196e-07	8.62328e-06
ENSMUSG00000020230	-0.517869	0.00526289	0.0308664
ENSMUSG00000020234	0.924326	0.00090772	0.00700347
ENSMUSG00000020235	0.450219	0.019225	0.0857193
ENSMUSG00000020238	0.455658	0.0087996	0.0467149
ENSMUSG00000020241	0.848907	1.45837e-06	2.33869e-05
ENSMUSG00000020256	0.608209	0.0265406	0.109755
ENSMUSG00000020272	0.494755	0.00418436	0.0255508
ENSMUSG00000020275	0.830795	2.74926e-06	4.17436e-05
ENSMUSG00000020279	1.54024	2.93134e-06	4.43489e-05
ENSMUSG00000020280	0.434559	0.0379832	0.14294
ENSMUSG00000020290	0.516213	0.00760906	0.0414926
ENSMUSG00000020295	-1.75064	0.00119645	NA
ENSMUSG00000020312	0.562418	0.0219287	0.0945445
ENSMUSG00000020315	-0.662858	3.77766e-05	0.000441678
ENSMUSG00000020325	-0.424989	0.00593573	0.0340295
ENSMUSG00000020328	0.401346	0.00901268	0.0475228
ENSMUSG00000020329	0.347228	0.0421868	0.154618
ENSMUSG00000020330	3.309	1.83593e-28	2.5497e-26
ENSMUSG00000020331	0.721943	0.0230882	0.0983384
ENSMUSG00000020334	1.2522	0.000330491	0.00293205
ENSMUSG00000020335	-0.751112	0.00943088	0.0493646
ENSMUSG00000020340	0.652326	0.00028096	0.00255649
ENSMUSG00000020357	-0.488397	0.00215125	0.0146979
ENSMUSG00000020374	-1.69867	0.000594291	0.00489326
ENSMUSG00000020377	0.954389	0.000545983	0.00454426
ENSMUSG00000020383	5.44259	1.32432e-29	1.99246e-27
ENSMUSG00000020387	-0.641506	4.49636e-05	0.000514871
ENSMUSG00000020388	1.24807	5.84184e-07	1.01821e-05
ENSMUSG00000020399	0.968834	8.71953e-05	0.000915255
ENSMUSG00000020400	0.649234	6.86627e-05	0.000742674
ENSMUSG00000020409	-0.334494	0.0457275	0.164157
ENSMUSG00000020412	-0.315326	0.038693	0.144832
ENSMUSG00000020415	1.5172	1.23273e-12	4.76063e-11
ENSMUSG00000020422	-0.790282	1.13844e-06	1.86146e-05
ENSMUSG00000020423	-0.761603	2.47081e-05	0.000302613
ENSMUSG00000020427	-1.2625	2.30127e-08	5.10306e-07
ENSMUSG00000020432	-0.45084	0.00304925	0.0195292
ENSMUSG00000020435	-1.7488	6.59098e-05	0.000715795
ENSMUSG00000020437	1.65433	1.66924e-14	7.61348e-13
ENSMUSG00000020440	0.438417	0.0186677	0.0838384
ENSMUSG00000020441	-0.737007	6.21162e-05	0.000681392
ENSMUSG00000020444	-0.53191	0.0126719	0.0625224
ENSMUSG00000020453	-0.359471	0.0355479	0.136357
ENSMUSG00000020463	-0.635701	0.0103818	0.0534677
ENSMUSG00000020467	-0.629243	0.000735181	0.00588033
ENSMUSG00000020469	-1.60051	0.00358361	0.0224261
ENSMUSG00000020474	0.532128	0.0382256	0.143553
ENSMUSG00000020486	-1.00764	2.23506e-08	4.96641e-07
ENSMUSG00000020493	2.63855	3.0774e-29	4.4448e-27
ENSMUSG00000020495	-0.350586	0.0454096	0.163449
ENSMUSG00000020519	-0.845277	2.56178e-09	6.46864e-08
ENSMUSG00000020520	0.73299	1.24119e-05	0.000163793
ENSMUSG00000020524	-1.3572	7.42946e-20	5.51231e-18
ENSMUSG00000020527	0.760719	0.000241984	0.00224234
ENSMUSG00000020534	0.509783	0.00624812	0.0353696
ENSMUSG00000020542	1.52234	1.97756e-05	0.000249093
ENSMUSG00000020553	0.695511	0.0029638	0.0190706
ENSMUSG00000020571	0.412187	0.00538181	0.0314617
ENSMUSG00000020573	1.01745	5.77228e-07	1.00771e-05
ENSMUSG00000020577	-0.730628	3.25327e-07	5.98319e-06
ENSMUSG00000020581	2.6031	2.45089e-06	3.76052e-05
ENSMUSG00000020589	-0.980785	0.00135933	0.0099325
ENSMUSG00000020599	-0.582979	0.000844643	0.00660382
ENSMUSG00000020601	-0.705297	2.13062e-06	3.30421e-05
ENSMUSG00000020604	0.413334	0.0401743	0.148884
ENSMUSG00000020610	-0.431178	0.0123451	0.0613012
ENSMUSG00000020612	-0.345526	0.0170188	0.078233
ENSMUSG00000020620	-0.903697	4.46607e-07	7.98987e-06
ENSMUSG00000020623	-0.679129	0.00213031	0.014587
ENSMUSG00000020629	-0.340147	0.0339867	0.131886
ENSMUSG00000020642	-1.17598	3.48599e-16	1.90237e-14
ENSMUSG00000020644	0.351086	0.0207498	0.0907985
ENSMUSG00000020649	3.08564	4.9553e-54	2.3857e-51
ENSMUSG00000020650	0.709146	0.000532983	0.00445833
ENSMUSG00000020651	6.1583	6.05901e-174	4.37561e-170
ENSMUSG00000020654	0.374952	0.0332501	0.129678
ENSMUSG00000020656	-0.509969	0.0102299	0.052832
ENSMUSG00000020658	-0.395239	0.0277364	0.113315
ENSMUSG00000020659	-0.424525	0.0377997	0.142447
ENSMUSG00000020661	0.509946	0.000227631	0.00212661
ENSMUSG00000020668	-0.460919	0.00615294	0.0350154
ENSMUSG00000020669	-0.790488	4.70745e-05	0.000536209
ENSMUSG00000020672	-0.837061	0.000811213	0.00639088
ENSMUSG00000020674	-0.58053	0.00217559	0.0148501
ENSMUSG00000020676	3.74126	5.19085e-55	2.67761e-52
ENSMUSG00000020679	0.468923	0.00912379	0.048024
ENSMUSG00000020681	-0.604321	5.87505e-05	0.000648081
ENSMUSG00000020684	1.13361	0.0118053	0.0591838
ENSMUSG00000020702	3.27083	1.80195e-09	4.64201e-08
ENSMUSG00000020717	-0.599798	0.000116902	0.00119241
ENSMUSG00000020732	1.01471	1.42447e-05	0.000185687
ENSMUSG00000020733	0.554714	0.00100774	0.00764717
ENSMUSG00000020734	-0.44163	0.0188485	0.0844926
ENSMUSG00000020737	0.772037	7.03918e-05	0.000757971
ENSMUSG00000020741	0.380112	0.0268969	0.110826
ENSMUSG00000020744	0.517653	0.0204174	0.0898464
ENSMUSG00000020773	0.490382	0.008312	0.0445741
ENSMUSG00000020787	0.756229	0.00033705	0.00298414
ENSMUSG00000020798	1.95648	6.91737e-08	1.43411e-06
ENSMUSG00000020799	-0.741558	0.00260159	0.017187
ENSMUSG00000020801	-0.441506	0.0244555	0.102839
ENSMUSG00000020805	2.16245	8.58474e-05	0.000903734
ENSMUSG00000020806	0.717779	4.25812e-06	6.20433e-05
ENSMUSG00000020808	3.31535	2.614e-24	2.684e-22
ENSMUSG00000020810	0.36782	0.0291578	0.117439
ENSMUSG00000020811	-0.477154	0.00293045	0.0188862
ENSMUSG00000020814	-0.712167	4.74142e-06	6.82853e-05
ENSMUSG00000020821	-0.344774	0.0421926	0.154618
ENSMUSG00000020834	-0.451806	0.018031	0.0816902
ENSMUSG00000020836	-1.16819	2.3092e-05	0.000285204
ENSMUSG00000020857	0.584851	0.000184766	0.0017783
ENSMUSG00000020864	-0.462551	0.00274043	0.0179153
ENSMUSG00000020865	-0.647622	0.000328254	0.0029146
ENSMUSG00000020869	0.613837	8.48546e-05	0.000895021
ENSMUSG00000020884	-3.13993	1.60339e-22	1.43543e-20
ENSMUSG00000020891	1.33877	0.0143312	0.0685854
ENSMUSG00000020893	-1.45819	5.61293e-14	2.42723e-12
ENSMUSG00000020897	3.22961	4.07266e-59	2.32195e-56
ENSMUSG00000020899	0.479787	0.0230241	0.0981537
ENSMUSG00000020900	-1.11682	9.07184e-09	2.09532e-07
ENSMUSG00000020901	1.86541	1.1496e-32	2.11069e-30
ENSMUSG00000020902	-0.294354	0.0461444	0.165243
ENSMUSG00000020903	-0.471313	0.0178101	0.08096
ENSMUSG00000020904	-0.436841	0.0310879	0.123378
ENSMUSG00000020911	-0.695325	0.000274997	0.00250856
ENSMUSG00000020914	3.27639	1.59255e-49	6.76521e-47
ENSMUSG00000020926	0.863195	0.00416705	0.0254954
ENSMUSG00000020928	-0.828732	9.43779e-06	0.000127887
ENSMUSG00000020930	-0.523261	0.04576	0.164246
ENSMUSG00000020935	0.352834	0.0332177	0.129646
ENSMUSG00000020941	0.752388	1.63899e-05	0.000211613
ENSMUSG00000020953	-1.35789	0.00896511	0.0473268
ENSMUSG00000020963	-1.2106	0.0177849	0.0808626
ENSMUSG00000020974	0.863752	0.000894272	0.00692685
ENSMUSG00000021003	0.726355	1.64354e-05	0.000211985
ENSMUSG00000021009	-0.34924	0.0295644	0.118702
ENSMUSG00000021032	-2.06624	1.45088e-12	5.56501e-11
ENSMUSG00000021033	-0.714826	0.00111019	0.00833701
ENSMUSG00000021048	-0.615653	0.000206941	0.00196294
ENSMUSG00000021055	-1.24771	9.40646e-07	1.56522e-05
ENSMUSG00000021061	-1.06588	0.000406014	0.00349614
ENSMUSG00000021062	0.996832	2.49269e-08	5.505e-07
ENSMUSG00000021070	-0.631079	0.00457355	0.0275264
ENSMUSG00000021087	-0.398037	0.0347509	0.134107
ENSMUSG00000021091	2.60998	5.74202e-56	3.11002e-53
ENSMUSG00000021094	-0.39823	0.00919909	0.0483499
ENSMUSG00000021096	-0.27598	0.0492545	0.172745
ENSMUSG00000021103	-0.6012	0.000141451	0.00140768
ENSMUSG00000021108	-0.689199	6.56437e-05	0.000714299
ENSMUSG00000021109	0.597731	0.000848216	0.00662317
ENSMUSG00000021112	-0.536022	0.0140937	0.0677931
ENSMUSG00000021115	0.656012	8.92806e-05	0.000935331
ENSMUSG00000021124	-0.315593	0.0350667	0.135048
ENSMUSG00000021125	1.17263	3.51429e-10	1.00049e-08
ENSMUSG00000021156	-0.52813	9.7032e-05	0.0010097
ENSMUSG00000021175	0.91653	2.25395e-06	3.48549e-05
ENSMUSG00000021176	1.24173	6.039e-05	0.000664812
ENSMUSG00000021178	-0.397196	0.00628404	0.0355188
ENSMUSG00000021182	0.573151	0.000805104	0.00636358
ENSMUSG00000021190	1.37916	4.76631e-18	3.1103e-16
ENSMUSG00000021203	-0.572424	0.0118067	0.0591838
ENSMUSG00000021214	1.96949	0.000322641	0.00287148
ENSMUSG00000021218	0.498039	0.0108018	0.055217
ENSMUSG00000021219	-0.548693	0.00994016	0.0516064
ENSMUSG00000021223	-0.898724	0.0247717	0.103841
ENSMUSG00000021224	-0.526278	0.000176956	0.00171379
ENSMUSG00000021234	-0.408389	0.042845	0.156348
ENSMUSG00000021236	-0.409728	0.0343936	0.133132
ENSMUSG00000021238	-1.18434	0.000110089	0.00112557
ENSMUSG00000021256	0.828506	0.00368681	0.0229921
ENSMUSG00000021262	0.858067	4.59581e-06	6.64675e-05
ENSMUSG00000021265	-0.812783	4.10411e-05	0.00047523
ENSMUSG00000021281	1.46826	1.67429e-08	3.77455e-07
ENSMUSG00000021282	-0.641992	0.0189755	0.0848861
ENSMUSG00000021285	-0.482346	0.0017619	0.01245
ENSMUSG00000021286	-0.394302	0.0286082	0.115942
ENSMUSG00000021287	0.671779	0.00117801	0.00879144
ENSMUSG00000021298	1.08558	7.70511e-06	0.000105988
ENSMUSG00000021302	-0.463108	0.0164391	0.0761823
ENSMUSG00000021306	0.309831	0.0436915	0.158682
ENSMUSG00000021313	-1.32339	0.000408527	0.00351359
ENSMUSG00000021314	-0.656679	0.00168236	0.0119542
ENSMUSG00000021319	1.62371	2.48481e-06	3.80718e-05
ENSMUSG00000021322	2.19013	3.55154e-12	1.30635e-10
ENSMUSG00000021326	0.490954	0.00773116	0.042021
ENSMUSG00000021327	0.436442	0.0130228	0.0639483
ENSMUSG00000021338	-0.69072	0.0005439	0.00453215
ENSMUSG00000021356	2.10195	6.83291e-23	6.43631e-21
ENSMUSG00000021360	-0.595066	0.000210102	0.00199032
ENSMUSG00000021361	0.618174	0.0147209	0.0698487
ENSMUSG00000021367	-0.765752	0.00509449	0.0300496
ENSMUSG00000021384	1.22013	9.00111e-07	1.50586e-05
ENSMUSG00000021390	-0.877126	0.00270384	0.0177028
ENSMUSG00000021391	1.91727	4.68079e-07	8.33958e-06
ENSMUSG00000021411	-1.03506	1.90474e-09	4.87779e-08
ENSMUSG00000021417	-0.31024	0.0415407	0.152686
ENSMUSG00000021423	2.17899	1.97374e-28	2.70839e-26
ENSMUSG00000021451	1.36143	2.52708e-10	7.32921e-09
ENSMUSG00000021453	0.575202	0.00585281	0.0336432
ENSMUSG00000021457	1.51351	3.64007e-19	2.59415e-17
ENSMUSG00000021461	-0.508026	0.0083672	0.0448147
ENSMUSG00000021464	1.0038	1.14926e-05	0.000152752
ENSMUSG00000021474	0.586808	4.68032e-05	0.000533399
ENSMUSG00000021476	-0.450675	0.00243801	0.0162922
ENSMUSG00000021482	-0.7237	0.000766069	0.00609105
ENSMUSG00000021484	0.394638	0.00680039	0.0379718
ENSMUSG00000021485	2.94652	4.53915e-28	5.92414e-26
ENSMUSG00000021493	0.503227	0.00702591	0.0389599
ENSMUSG00000021508	-0.400081	0.024808	0.103959
ENSMUSG00000021519	-0.427535	0.0143759	0.0687531
ENSMUSG00000021520	-0.521451	0.0423494	0.154931
ENSMUSG00000021534	-0.76329	0.00720362	0.0398128
ENSMUSG00000021536	-0.39412	0.0454461	0.163524
ENSMUSG00000021552	-0.72342	0.000161785	0.00158386
ENSMUSG00000021556	0.737996	2.10414e-06	3.27018e-05
ENSMUSG00000021559	0.445903	0.0320544	0.126288
ENSMUSG00000021569	2.30713	4.04932e-31	6.96258e-29
ENSMUSG00000021573	-0.610404	7.22257e-05	0.000776176
ENSMUSG00000021575	1.2774	0.00283827	0.018427
ENSMUSG00000021587	0.773267	0.0229862	0.0981046
ENSMUSG00000021591	0.759473	0.000543385	0.00453135
ENSMUSG00000021608	-0.532729	0.0467907	0.166812
ENSMUSG00000021609	1.36668	0.00901318	NA
ENSMUSG00000021614	2.0433	8.85358e-13	3.44987e-11
ENSMUSG00000021622	-1.45053	0.00758626	0.0413922
ENSMUSG00000021624	1.49477	6.28502e-11	1.98491e-09
ENSMUSG00000021636	-0.43511	0.0179455	0.0814047
ENSMUSG00000021638	-0.650592	0.0022937	0.0154759
ENSMUSG00000021640	2.70141	2.83795e-09	7.11623e-08
ENSMUSG00000021646	-0.543827	0.000555942	0.00461651
ENSMUSG00000021662	-0.922519	3.18343e-09	7.90023e-08
ENSMUSG00000021665	1.20021	4.64211e-12	1.68359e-10
ENSMUSG00000021669	-0.442315	0.00678242	0.0379007
ENSMUSG00000021671	-0.355589	0.0174427	0.079624
ENSMUSG00000021675	0.905302	0.00155061	0.0111497
ENSMUSG00000021676	0.744624	2.20778e-05	0.000274736
ENSMUSG00000021679	-0.970471	0.043851	NA
ENSMUSG00000021684	-0.792538	2.61231e-08	5.73993e-07
ENSMUSG00000021697	1.93497	5.24025e-15	2.55124e-13
ENSMUSG00000021700	0.788333	0.0247402	0.103795
ENSMUSG00000021701	-0.351983	0.0413709	0.152312
ENSMUSG00000021702	1.96344	1.42353e-05	0.000185676
ENSMUSG00000021707	0.907325	7.19878e-06	9.9656e-05
ENSMUSG00000021708	-0.563614	0.0102813	0.0530471
ENSMUSG00000021714	1.93095	9.12634e-06	0.000124119
ENSMUSG00000021715	-0.541871	0.0117111	0.0588
ENSMUSG00000021720	1.23861	4.00181e-11	1.30179e-09
ENSMUSG00000021725	0.513893	0.00100701	0.00764429
ENSMUSG00000021730	1.04624	0.00249781	0.0166504
ENSMUSG00000021732	-0.41455	0.0135555	0.0657887
ENSMUSG00000021733	0.72804	0.000243747	0.00225578
ENSMUSG00000021749	5.75958	1.7698e-34	3.65168e-32
ENSMUSG00000021750	-0.952153	0.000204244	0.00194076
ENSMUSG00000021754	0.366951	0.0108096	0.0552204
ENSMUSG00000021756	0.650934	0.00256921	0.0170116
ENSMUSG00000021759	-0.883069	1.18573e-07	2.36981e-06
ENSMUSG00000021763	-0.580838	0.00321339	0.0203882
ENSMUSG00000021765	0.903156	0.000101295	0.00104702
ENSMUSG00000021768	1.87168	0.00019514	0.00186571
ENSMUSG00000021770	-0.559918	0.0305602	0.121703
ENSMUSG00000021771	0.336108	0.0205489	0.0901932
ENSMUSG00000021772	-1.11972	9.57024e-07	1.58881e-05
ENSMUSG00000021773	0.882798	1.14176e-05	0.000152223
ENSMUSG00000021779	-0.638505	0.0108661	0.0554046
ENSMUSG00000021789	0.707763	9.24657e-05	0.000965896
ENSMUSG00000021792	-0.645293	9.27171e-05	0.00096759
ENSMUSG00000021795	0.918038	6.33709e-07	1.09571e-05
ENSMUSG00000021798	-1.20014	0.000831914	0.006522
ENSMUSG00000021803	1.39837	0.00998962	0.0518011
ENSMUSG00000021809	-0.395392	0.0351881	0.135312
ENSMUSG00000021815	0.894538	0.0483104	0.170491
ENSMUSG00000021822	-0.327703	0.039867	0.147998
ENSMUSG00000021823	-0.643638	7.96069e-05	0.000845847
ENSMUSG00000021835	-0.76782	0.00155645	0.0111879
ENSMUSG00000021838	-0.503005	0.0270296	0.111182
ENSMUSG00000021880	0.980966	4.36464e-06	6.34631e-05
ENSMUSG00000021884	-0.408243	0.0166408	0.0769198
ENSMUSG00000021886	2.21234	1.72686e-24	1.81614e-22
ENSMUSG00000021891	-0.410645	0.0140705	0.0677255
ENSMUSG00000021892	-0.646661	7.55965e-05	0.000808789
ENSMUSG00000021895	-0.37699	0.0085067	0.0454383
ENSMUSG00000021903	-1.30968	2.13937e-11	7.11974e-10
ENSMUSG00000021904	-0.691793	3.245e-06	4.84848e-05
ENSMUSG00000021905	-0.596794	0.000369403	0.00322706
ENSMUSG00000021908	0.822223	0.00565847	0.0327083
ENSMUSG00000021913	1.56185	0.000140426	0.00139877
ENSMUSG00000021922	0.386476	0.0333256	0.129926
ENSMUSG00000021929	0.407546	0.0257038	0.106947
ENSMUSG00000021930	-0.36845	0.0253991	0.106002
ENSMUSG00000021939	1.58994	9.4859e-27	1.12302e-24
ENSMUSG00000021948	1.22484	6.00877e-13	2.37122e-11
ENSMUSG00000021957	0.388447	0.0229665	0.0980626
ENSMUSG00000021959	-0.544399	0.000946182	0.00724513
ENSMUSG00000021965	2.72904	1.85991e-16	1.05484e-14
ENSMUSG00000021974	-0.87417	0.0451208	0.162761
ENSMUSG00000021978	-0.458459	0.00780036	0.0422698
ENSMUSG00000021982	-0.51482	0.000362223	0.00316901
ENSMUSG00000021986	1.42017	0.00444441	0.0269036
ENSMUSG00000021994	0.977795	3.3241e-07	6.08762e-06
ENSMUSG00000021998	1.13582	2.45009e-12	9.16772e-11
ENSMUSG00000022000	-0.462578	0.00289415	0.0186929
ENSMUSG00000022010	-0.50166	0.000565014	0.00468288
ENSMUSG00000022014	1.15077	3.53206e-09	8.7155e-08
ENSMUSG00000022015	2.14719	3.57651e-08	7.68701e-07
ENSMUSG00000022018	-1.14174	1.10294e-10	3.3798e-09
ENSMUSG00000022021	2.35706	4.15357e-25	4.52196e-23
ENSMUSG00000022023	-0.425351	0.00511994	0.0301833
ENSMUSG00000022026	1.13022	0.0123229	0.0612048
ENSMUSG00000022032	-0.442882	0.0203283	0.089551
ENSMUSG00000022033	3.2953	9.19201e-25	9.85866e-23
ENSMUSG00000022034	3.27889	2.7807e-21	2.22302e-19
ENSMUSG00000022048	-0.628722	5.12708e-05	0.000575237
ENSMUSG00000022051	-0.362466	0.0255454	0.106431
ENSMUSG00000022057	1.23106	0.025286	0.10562
ENSMUSG00000022070	1.3869	9.46655e-11	2.92572e-09
ENSMUSG00000022090	-0.50468	0.00106707	0.00805228
ENSMUSG00000022091	-0.300837	0.0315976	0.124897
ENSMUSG00000022094	0.960361	0.000125254	0.00126864
ENSMUSG00000022096	1.13803	2.96192e-10	8.48808e-09
ENSMUSG00000022097	-0.347665	0.0248437	0.104068
ENSMUSG00000022098	0.581542	5.27475e-05	0.000589059
ENSMUSG00000022099	-0.580551	0.00223025	0.0151288
ENSMUSG00000022101	1.32439	0.0110737	NA
ENSMUSG00000022102	1.67485	2.04077e-16	1.1484e-14
ENSMUSG00000022106	0.471564	0.00625823	0.0354099
ENSMUSG00000022108	-0.367276	0.00922419	0.0484465
ENSMUSG00000022110	-0.310164	0.0394989	0.147136
ENSMUSG00000022111	0.505207	0.0182497	0.082405
ENSMUSG00000022114	-0.793157	0.00381077	0.023652
ENSMUSG00000022122	-0.614627	1.95767e-05	0.000247162
ENSMUSG00000022123	-0.787592	4.0412e-07	7.29604e-06
ENSMUSG00000022125	0.421046	0.00507687	0.0299783
ENSMUSG00000022126	2.23159	5.30939e-05	0.000592622
ENSMUSG00000022132	-0.572823	0.00268918	0.0176335
ENSMUSG00000022142	0.405611	0.0293013	0.117885
ENSMUSG00000022144	-0.704233	0.00184543	0.0129473
ENSMUSG00000022148	0.577412	0.0110503	0.0561717
ENSMUSG00000022150	1.44618	5.51553e-15	2.67324e-13
ENSMUSG00000022157	1.53789	0.000102824	0.0010603
ENSMUSG00000022159	-1.53532	2.31826e-05	0.000285905
ENSMUSG00000022174	-0.367879	0.024049	0.101445
ENSMUSG00000022176	-0.862193	0.00281678	0.0183205
ENSMUSG00000022180	1.91704	1.33859e-18	9.09106e-17
ENSMUSG00000022181	0.356465	0.0185207	0.0834027
ENSMUSG00000022197	-0.40659	0.00706858	0.0391447
ENSMUSG00000022203	0.500472	0.0323112	0.12693
ENSMUSG00000022215	-1.05294	0.0497115	0.173766
ENSMUSG00000022218	1.79154	5.3374e-18	3.4313e-16
ENSMUSG00000022220	-0.544734	0.00062092	0.00508399
ENSMUSG00000022221	0.659069	5.73875e-05	0.000635634
ENSMUSG00000022226	1.29861	0.0129127	0.063537
ENSMUSG00000022227	2.93384	6.19666e-10	1.70585e-08
ENSMUSG00000022257	-0.659017	4.73448e-06	6.82773e-05
ENSMUSG00000022261	-0.580963	0.000202561	0.00192815
ENSMUSG00000022272	-0.747189	9.16037e-06	0.000124504
ENSMUSG00000022283	0.37324	0.00651252	0.0366192
ENSMUSG00000022292	-0.457067	0.00948422	0.0495839
ENSMUSG00000022303	3.10845	2.20937e-18	1.46828e-16
ENSMUSG00000022305	1.07139	3.59296e-09	8.82558e-08
ENSMUSG00000022307	-0.335723	0.0301103	0.120491
ENSMUSG00000022309	-0.827894	0.000286068	0.002591
ENSMUSG00000022322	3.05171	3.08872e-28	4.15634e-26
ENSMUSG00000022323	-0.466721	0.0119915	0.059902
ENSMUSG00000022340	-0.485802	0.0381026	0.143315
ENSMUSG00000022346	1.24697	1.46657e-11	4.9958e-10
ENSMUSG00000022350	0.317103	0.0400351	0.148419
ENSMUSG00000022360	1.48948	1.79257e-13	7.43984e-12
ENSMUSG00000022364	1.01959	4.45868e-08	9.48894e-07
ENSMUSG00000022367	1.17771	0.00098443	0.00749918
ENSMUSG00000022371	0.47071	0.0107391	0.0549759
ENSMUSG00000022372	1.14386	1.02121e-08	2.34618e-07
ENSMUSG00000022376	-0.577091	0.000714875	0.00574685
ENSMUSG00000022378	1.04293	5.39618e-09	1.29038e-07
ENSMUSG00000022382	0.577257	0.019255	0.0858178
ENSMUSG00000022383	-0.462474	0.0367065	0.139517
ENSMUSG00000022385	2.66866	3.91642e-16	2.12123e-14
ENSMUSG00000022390	0.507927	0.0104789	0.0539
ENSMUSG00000022391	0.389535	0.0160074	0.0746291
ENSMUSG00000022400	-0.405825	0.011088	0.056311
ENSMUSG00000022408	1.76467	1.95585e-10	5.80459e-09
ENSMUSG00000022416	0.927984	0.0106534	0.0546676
ENSMUSG00000022422	2.54001	8.82756e-12	3.09465e-10
ENSMUSG00000022428	-0.37864	0.0391075	0.14608
ENSMUSG00000022433	-0.394014	0.0138427	0.066868
ENSMUSG00000022436	1.05556	2.58573e-10	7.48927e-09
ENSMUSG00000022439	0.881118	2.19828e-05	0.000273711
ENSMUSG00000022440	0.786038	1.46552e-05	0.000190694
ENSMUSG00000022453	0.395207	0.0232251	0.0987773
ENSMUSG00000022455	1.02322	0.036808	NA
ENSMUSG00000022456	0.582777	0.011863	0.0593973
ENSMUSG00000022464	-1.0635	3.71058e-06	5.47614e-05
ENSMUSG00000022466	-0.378253	0.0366467	0.139338
ENSMUSG00000022468	-0.777955	0.00215021	0.0146979
ENSMUSG00000022469	-0.608134	6.88867e-05	0.000744354
ENSMUSG00000022479	0.937479	2.37017e-06	3.6496e-05
ENSMUSG00000022488	1.74915	1.49858e-27	1.86591e-25
ENSMUSG00000022489	0.790174	5.20777e-05	0.000583384
ENSMUSG00000022498	0.382865	0.0313353	0.123973
ENSMUSG00000022500	0.924914	8.20241e-09	1.90262e-07
ENSMUSG00000022503	0.429308	0.0181937	0.0822553
ENSMUSG00000022504	2.03861	9.38662e-19	6.45591e-17
ENSMUSG00000022505	-0.812307	5.91207e-06	8.33344e-05
ENSMUSG00000022508	-0.519176	0.0100062	0.0518527
ENSMUSG00000022510	0.97011	0.00193326	0.0134502
ENSMUSG00000022512	0.590859	0.00239759	0.0160618
ENSMUSG00000022519	-0.926882	0.0132803	0.0648889
ENSMUSG00000022528	-0.352175	0.0229964	0.0981046
ENSMUSG00000022534	2.14969	2.03213e-10	6.0063e-09
ENSMUSG00000022537	-0.71992	0.00021684	0.00204332
ENSMUSG00000022548	-0.891772	0.000111491	0.00113883
ENSMUSG00000022553	-0.449347	0.0145314	0.0692636
ENSMUSG00000022558	0.52552	0.000786608	0.00623245
ENSMUSG00000022561	0.524405	0.00383314	0.0237475
ENSMUSG00000022571	0.440681	0.0286494	0.11606
ENSMUSG00000022574	0.633517	0.00222628	0.0151237
ENSMUSG00000022579	-1.13148	9.88863e-10	2.62224e-08
ENSMUSG00000022586	3.21332	2.23087e-21	1.79672e-19
ENSMUSG00000022595	1.05449	4.84647e-05	0.000549157
ENSMUSG00000022596	-2.09638	1.96867e-10	5.82835e-09
ENSMUSG00000022607	-0.519487	0.000281937	0.00256247
ENSMUSG00000022610	-0.584102	0.000173652	0.00168405
ENSMUSG00000022635	-0.688856	1.86109e-05	0.000236762
ENSMUSG00000022650	4.51007	1.71337e-18	1.14923e-16
ENSMUSG00000022651	0.840879	0.000400142	0.00345795
ENSMUSG00000022656	-0.51669	0.000865359	0.0067342
ENSMUSG00000022657	0.458239	0.0387931	0.145106
ENSMUSG00000022659	1.3056	6.59133e-05	0.000715795
ENSMUSG00000022665	0.801807	0.00275031	0.0179583
ENSMUSG00000022667	2.17717	5.06698e-24	5.12973e-22
ENSMUSG00000022672	0.365087	0.0377428	0.142332
ENSMUSG00000022673	0.632962	3.10561e-05	0.000370297
ENSMUSG00000022676	-1.08412	4.27072e-10	1.19851e-08
ENSMUSG00000022677	-0.364395	0.0371806	0.140677
ENSMUSG00000022679	-1.37978	6.68462e-07	1.15121e-05
ENSMUSG00000022684	-0.317069	0.0459662	0.164759
ENSMUSG00000022685	-0.392847	0.0171544	0.0786396
ENSMUSG00000022687	-0.334574	0.0416775	0.153093
ENSMUSG00000022702	-0.504514	0.000438433	0.00375292
ENSMUSG00000022708	-1.02468	5.12892e-06	7.32969e-05
ENSMUSG00000022711	0.518996	0.0486165	0.171153
ENSMUSG00000022724	0.416585	0.0267476	0.110352
ENSMUSG00000022747	-0.509069	0.00130019	0.00956491
ENSMUSG00000022756	-0.555817	0.0124615	0.0616772
ENSMUSG00000022757	0.60094	0.00556851	0.0322831
ENSMUSG00000022758	-0.443881	0.0450075	0.16246
ENSMUSG00000022762	-1.66143	0.00258325	0.0170889
ENSMUSG00000022763	0.452567	0.0491082	0.172425
ENSMUSG00000022765	0.345198	0.0240659	0.101497
ENSMUSG00000022768	0.99313	0.0260262	0.108101
ENSMUSG00000022769	2.14613	3.50591e-28	4.68861e-26
ENSMUSG00000022774	-0.511328	0.0363391	0.138387
ENSMUSG00000022793	-0.763378	6.13128e-07	1.06608e-05
ENSMUSG00000022797	1.0609	1.52356e-08	3.44909e-07
ENSMUSG00000022799	-0.364026	0.0467714	0.166812
ENSMUSG00000022803	-1.17789	1.73991e-06	2.7555e-05
ENSMUSG00000022805	-0.471046	0.030033	0.120249
ENSMUSG00000022807	0.477371	0.00225229	0.0152507
ENSMUSG00000022814	0.372586	0.0123881	0.0614163
ENSMUSG00000022818	1.52641	0.000145078	0.00143872
ENSMUSG00000022831	1.07601	1.76919e-09	4.56846e-08
ENSMUSG00000022837	-0.522373	0.0127652	0.0628971
ENSMUSG00000022838	1.24324	0.00862791	0.0459498
ENSMUSG00000022840	-0.322348	0.0358727	0.137189
ENSMUSG00000022863	-0.658987	5.78803e-06	8.17988e-05
ENSMUSG00000022868	2.43092	1.48327e-13	6.21566e-12
ENSMUSG00000022871	1.20174	4.90653e-10	1.36808e-08
ENSMUSG00000022876	1.48155	8.01405e-12	2.82316e-10
ENSMUSG00000022878	-1.16686	0.029216	0.117651
ENSMUSG00000022881	1.2005	3.67984e-10	1.0435e-08
ENSMUSG00000022884	-0.490253	0.0014998	0.0108347
ENSMUSG00000022890	-0.391701	0.0498554	0.1741
ENSMUSG00000022893	-0.646742	0.00192655	0.0134242
ENSMUSG00000022895	-0.652707	0.000109738	0.00112251
ENSMUSG00000022901	1.43777	1.70364e-13	7.08432e-12
ENSMUSG00000022906	0.314921	0.04405	0.159616
ENSMUSG00000022941	-0.351348	0.0456846	0.164057
ENSMUSG00000022945	1.45533	3.54951e-16	1.93216e-14
ENSMUSG00000022947	0.43537	0.0185911	0.0836064
ENSMUSG00000022952	0.312068	0.0352303	0.135379
ENSMUSG00000022960	0.364041	0.0233669	0.0992246
ENSMUSG00000022965	0.559666	0.000185331	0.00178216
ENSMUSG00000022967	0.385662	0.023159	0.0985931
ENSMUSG00000022974	0.42638	0.0337933	0.131277
ENSMUSG00000022978	0.539653	0.00357611	0.0223985
ENSMUSG00000022982	-0.710331	2.09899e-05	0.000262556
ENSMUSG00000022987	-0.756264	9.78738e-05	0.00101651
ENSMUSG00000022993	1.36311	0.0130484	0.064045
ENSMUSG00000022996	-0.528226	0.0220127	0.0947744
ENSMUSG00000023011	-1.55967	4.52186e-14	1.98714e-12
ENSMUSG00000023015	2.38496	9.379e-39	2.53995e-36
ENSMUSG00000023019	0.704313	3.86775e-05	0.000450752
ENSMUSG00000023026	0.350845	0.0371432	0.140609
ENSMUSG00000023031	1.15601	0.0100033	0.0518527
ENSMUSG00000023032	1.0352	2.3169e-07	4.40699e-06
ENSMUSG00000023034	-0.809808	0.00882499	0.0467496
ENSMUSG00000023036	0.512522	0.0467776	0.166812
ENSMUSG00000023039	-0.57181	0.000925724	0.00712462
ENSMUSG00000023045	2.17424	1.8301e-05	0.000233367
ENSMUSG00000023046	-1.15547	9.98016e-06	0.000134633
ENSMUSG00000023047	-0.627261	0.0294587	0.118365
ENSMUSG00000023051	0.442333	0.0213136	0.092574
ENSMUSG00000023055	-0.711272	5.77175e-05	0.000638963
ENSMUSG00000023064	-0.665502	0.0156651	0.0734123
ENSMUSG00000023066	0.41917	0.033083	0.129237
ENSMUSG00000023067	-0.688762	1.72075e-05	0.000220854
ENSMUSG00000023078	4.37896	4.4504e-71	3.70838e-68
ENSMUSG00000023087	0.671373	2.74543e-05	0.000331547
ENSMUSG00000023089	-0.709864	0.00126368	0.00933752
ENSMUSG00000023092	-0.71916	2.47361e-07	4.66818e-06
ENSMUSG00000023094	-0.695292	8.51589e-05	0.000897795
ENSMUSG00000023104	0.373528	0.0146308	0.0695451
ENSMUSG00000023122	-1.12417	0.0362775	0.138201
ENSMUSG00000023132	-0.653831	0.00759806	0.0414431
ENSMUSG00000023169	1.13672	3.10782e-11	1.02171e-09
ENSMUSG00000023186	0.359049	0.0162276	0.0754469
ENSMUSG00000023216	-1.79876	0.00110681	0.00831737
ENSMUSG00000023232	-0.372755	0.0227004	0.0972136
ENSMUSG00000023243	-0.63552	0.0108267	0.0552947
ENSMUSG00000023259	0.530649	0.0134771	0.0655696
ENSMUSG00000023272	0.497082	0.00212794	0.0145754
ENSMUSG00000023274	1.13737	7.85578e-07	1.32654e-05
ENSMUSG00000023277	0.420771	0.0146691	0.0696944
ENSMUSG00000023349	1.26338	2.85203e-11	9.39045e-10
ENSMUSG00000023367	0.346625	0.0204244	0.0898464
ENSMUSG00000023393	1.40393	1.3877e-07	2.73066e-06
ENSMUSG00000023460	-0.697853	3.78355e-06	5.57245e-05
ENSMUSG00000023473	1.46977	0.000109627	0.0011219
ENSMUSG00000023505	3.10782	3.38066e-35	7.39818e-33
ENSMUSG00000023764	0.441947	0.0100229	0.0519114
ENSMUSG00000023805	0.332964	0.0308622	0.122662
ENSMUSG00000023809	-0.462905	0.00331633	0.0209654
ENSMUSG00000023827	-0.56592	0.000317688	0.00283123
ENSMUSG00000023868	0.647622	0.0393444	0.146737
ENSMUSG00000023886	-0.526689	0.00208101	0.0143082
ENSMUSG00000023903	2.28727	2.90374e-20	2.21513e-18
ENSMUSG00000023908	1.42331	2.51107e-10	7.29254e-09
ENSMUSG00000023913	1.42106	1.92271e-15	9.89441e-14
ENSMUSG00000023919	0.672933	0.0149439	0.0706603
ENSMUSG00000023923	0.304694	0.0471092	0.16748
ENSMUSG00000023940	3.27531	1.54596e-29	2.30988e-27
ENSMUSG00000023942	-0.418413	0.0126718	0.0625224
ENSMUSG00000023944	-0.361173	0.0455506	0.163747
ENSMUSG00000023947	1.41451	7.38573e-13	2.8883e-11
ENSMUSG00000023951	-0.998227	3.64405e-11	1.18719e-09
ENSMUSG00000023953	0.370151	0.0376442	0.142034
ENSMUSG00000023959	-0.512896	0.003561	0.0223297
ENSMUSG00000023961	-0.39627	0.00895602	0.0472903
ENSMUSG00000023963	-0.374621	0.0361043	0.137687
ENSMUSG00000023973	-0.559582	0.0243049	0.102305
ENSMUSG00000023980	-0.476645	0.0135771	0.0658637
ENSMUSG00000023982	0.841146	0.0248297	0.104029
ENSMUSG00000023990	0.50082	0.0246248	0.103391
ENSMUSG00000023992	3.45591	5.43553e-55	2.73862e-52
ENSMUSG00000023993	-0.750085	0.0239846	0.101226
ENSMUSG00000023999	-0.542562	0.0317862	0.125505
ENSMUSG00000024002	0.41119	0.0281257	0.114538
ENSMUSG00000024006	0.376793	0.0167428	0.0772427
ENSMUSG00000024013	1.17548	2.13805e-10	6.31075e-09
ENSMUSG00000024014	1.30405	7.47829e-12	2.64302e-10
ENSMUSG00000024027	-0.714066	0.00125647	0.00928769
ENSMUSG00000024028	2.93112	1.08311e-07	2.17677e-06
ENSMUSG00000024030	0.840374	1.74462e-05	0.000223784
ENSMUSG00000024032	2.5222	5.0002e-06	7.16937e-05
ENSMUSG00000024039	-1.41716	2.03429e-07	3.8865e-06
ENSMUSG00000024042	-0.68227	0.00135994	0.00993359
ENSMUSG00000024044	-0.789001	0.000337804	0.00298679
ENSMUSG00000024048	-0.857403	2.65065e-09	6.66974e-08
ENSMUSG00000024049	-0.831161	0.00889426	0.0470215
ENSMUSG00000024052	-0.718284	0.0181327	0.0820801
ENSMUSG00000024053	1.34781	6.97116e-10	1.89975e-08
ENSMUSG00000024056	2.44513	5.49326e-14	2.38023e-12
ENSMUSG00000024065	-0.379084	0.0170373	0.0782684
ENSMUSG00000024074	-0.547777	0.000122698	0.00124509
ENSMUSG00000024079	0.565911	0.0133443	0.0650988
ENSMUSG00000024082	-0.395169	0.0199969	0.0884692
ENSMUSG00000024087	1.29483	2.01689e-14	9.16056e-13
ENSMUSG00000024096	-0.450656	0.00143454	0.0104048
ENSMUSG00000024098	-0.495393	0.0010707	0.00807686
ENSMUSG00000024112	1.82318	6.88061e-05	0.000743855
ENSMUSG00000024121	0.584586	0.00743115	0.0407823
ENSMUSG00000024124	1.58655	1.14626e-05	0.000152458
ENSMUSG00000024132	-0.428774	0.023933	0.101074
ENSMUSG00000024140	-0.689521	2.59879e-07	4.89164e-06
ENSMUSG00000024143	0.455995	0.00131659	0.00966911
ENSMUSG00000024164	2.15317	2.1918e-33	4.23977e-31
ENSMUSG00000024165	0.693004	0.00031164	0.00278879
ENSMUSG00000024168	-0.916036	5.5967e-08	1.17379e-06
ENSMUSG00000024173	1.41633	0.010174	0.0525809
ENSMUSG00000024177	0.947392	0.0010322	0.0078164
ENSMUSG00000024190	-1.09423	6.65276e-06	9.26298e-05
ENSMUSG00000024193	-0.420148	0.0127687	0.0629
ENSMUSG00000024215	1.70972	9.04813e-08	1.8441e-06
ENSMUSG00000024220	-0.588527	0.049435	0.173247
ENSMUSG00000024232	-0.882217	1.5626e-07	3.03893e-06
ENSMUSG00000024235	0.454843	0.0110413	0.0561526
ENSMUSG00000024238	-0.542813	0.0244268	0.102739
ENSMUSG00000024245	-0.640366	0.00118771	0.00884813
ENSMUSG00000024251	-1.0878	0.0315915	0.124896
ENSMUSG00000024253	-0.570528	0.00131998	0.00969077
ENSMUSG00000024270	-0.309004	0.0379827	0.14294
ENSMUSG00000024298	0.645861	0.0107154	0.0548945
ENSMUSG00000024300	1.46222	4.89467e-15	2.38836e-13
ENSMUSG00000024301	1.61249	7.37798e-09	1.73179e-07
ENSMUSG00000024304	-0.681606	0.000869044	0.00675526
ENSMUSG00000024309	-0.479763	0.0187624	0.0841588
ENSMUSG00000024330	0.864712	0.00471006	0.0281654
ENSMUSG00000024334	0.687751	0.0317256	0.125312
ENSMUSG00000024338	0.544334	0.00627316	0.0354759
ENSMUSG00000024340	1.07521	0.00693702	0.0385954
ENSMUSG00000024349	1.41238	7.97493e-18	5.06549e-16
ENSMUSG00000024350	-0.310514	0.0383912	0.144
ENSMUSG00000024353	1.91232	4.47544e-11	1.44286e-09
ENSMUSG00000024354	-0.472606	0.0181583	0.0821547
ENSMUSG00000024357	-0.390553	0.00758616	0.0413922
ENSMUSG00000024366	-1.06223	0.0471775	0.167667
ENSMUSG00000024376	-0.703416	2.3032e-05	0.000284811
ENSMUSG00000024379	-0.859669	0.000483167	0.00409379
ENSMUSG00000024393	0.389176	0.0129904	0.0638179
ENSMUSG00000024395	-0.541619	0.00022628	0.00211765
ENSMUSG00000024397	2.0973	5.89974e-24	5.89023e-22
ENSMUSG00000024399	1.11556	6.00067e-05	0.000660928
ENSMUSG00000024401	1.97882	2.86852e-10	8.25317e-09
ENSMUSG00000024402	1.66795	1.15824e-06	1.89097e-05
ENSMUSG00000024413	0.288812	0.0461904	0.16538
ENSMUSG00000024424	1.14752	3.29868e-11	1.07954e-09
ENSMUSG00000024427	-0.680231	0.000871198	0.00676264
ENSMUSG00000024437	1.52879	2.41568e-07	4.56682e-06
ENSMUSG00000024442	-0.42107	0.00457358	0.0275264
ENSMUSG00000024451	-0.380755	0.00681578	0.0380283
ENSMUSG00000024479	-0.608024	0.000265704	0.00243403
ENSMUSG00000024480	0.699337	3.92686e-05	0.000457149
ENSMUSG00000024486	-0.384342	0.0154556	0.0726663
ENSMUSG00000024500	-0.868928	0.000499116	0.00422232
ENSMUSG00000024507	-0.381188	0.00611975	0.0348631
ENSMUSG00000024516	0.620698	0.000109486	0.00112099
ENSMUSG00000024517	-1.26636	1.75275e-05	0.000224443
ENSMUSG00000024525	0.963377	0.000482285	0.00408951
ENSMUSG00000024526	-1.14318	0.00237447	0.0159414
ENSMUSG00000024529	0.635414	0.00222466	0.0151231
ENSMUSG00000024534	-0.6434	0.00532437	0.0311901
ENSMUSG00000024539	0.476522	0.0132631	0.0648343
ENSMUSG00000024542	0.700579	0.000729859	0.00584562
ENSMUSG00000024556	0.73748	6.2801e-07	1.08673e-05
ENSMUSG00000024575	1.36567	1.34171e-08	3.04697e-07
ENSMUSG00000024579	0.580575	0.00284186	0.0184338
ENSMUSG00000024588	-0.423609	0.00635079	0.03584
ENSMUSG00000024589	-0.428695	0.00766376	0.0417384
ENSMUSG00000024590	1.532	1.11278e-22	1.01296e-20
ENSMUSG00000024593	-0.792404	0.0470347	0.16728
ENSMUSG00000024601	0.340458	0.0456759	0.164057
ENSMUSG00000024610	1.07818	8.43674e-08	1.72599e-06
ENSMUSG00000024613	0.392233	0.0200227	0.088529
ENSMUSG00000024620	-0.470625	0.00649921	0.0365567
ENSMUSG00000024621	1.45898	2.20036e-21	1.77876e-19
ENSMUSG00000024622	-0.298918	0.0415335	0.152686
ENSMUSG00000024640	0.968809	0.000182299	0.00175768
ENSMUSG00000024642	-0.545675	0.024237	0.102075
ENSMUSG00000024644	0.469297	0.00132614	0.00972607
ENSMUSG00000024646	-0.485116	0.00558917	0.0323769
ENSMUSG00000024653	-1.07637	1.87759e-08	4.21097e-07
ENSMUSG00000024660	1.58211	1.74982e-15	9.05069e-14
ENSMUSG00000024663	2.62616	9.31591e-52	4.11896e-49
ENSMUSG00000024664	-0.478171	0.00143387	0.0104035
ENSMUSG00000024667	-0.711542	0.01078	0.0551211
ENSMUSG00000024669	1.34248	2.02301e-07	3.86836e-06
ENSMUSG00000024670	1.48046	5.30917e-09	1.27238e-07
ENSMUSG00000024672	3.95254	5.05949e-75	5.21971e-72
ENSMUSG00000024673	0.666279	0.017959	0.0814167
ENSMUSG00000024675	0.637359	0.0210282	0.0915913
ENSMUSG00000024677	1.10078	3.30893e-08	7.12605e-07
ENSMUSG00000024678	-0.792485	1.27225e-05	0.000167254
ENSMUSG00000024679	3.07613	2.36402e-53	1.08971e-50
ENSMUSG00000024696	2.26308	8.77386e-17	5.13745e-15
ENSMUSG00000024730	1.86933	9.39367e-16	4.95168e-14
ENSMUSG00000024736	0.542965	0.00525749	0.0308431
ENSMUSG00000024737	0.978589	4.91145e-06	7.06082e-05
ENSMUSG00000024740	-0.357151	0.0293643	0.118073
ENSMUSG00000024742	0.583126	0.0140375	0.0675977
ENSMUSG00000024743	0.598205	0.000106178	0.00109026
ENSMUSG00000024754	-0.797448	5.15214e-06	7.35801e-05
ENSMUSG00000024761	-0.516147	0.0204242	0.0898464
ENSMUSG00000024764	0.603151	2.79289e-05	0.000336155
ENSMUSG00000024769	-0.940423	1.24682e-07	2.48047e-06
ENSMUSG00000024772	-0.386664	0.0486541	0.171258
ENSMUSG00000024773	0.425809	0.0102864	0.0530606
ENSMUSG00000024778	-0.560605	0.00280191	0.0182402
ENSMUSG00000024781	0.848813	2.23547e-06	3.45939e-05
ENSMUSG00000024789	0.583221	0.00115976	0.00867317
ENSMUSG00000024791	3.16721	8.59268e-30	1.31099e-27
ENSMUSG00000024793	0.658502	0.00475206	0.0283696
ENSMUSG00000024795	1.9053	1.08678e-06	1.78372e-05
ENSMUSG00000024798	1.45495	0.00758682	0.0413922
ENSMUSG00000024803	-0.962627	8.00344e-06	0.000109743
ENSMUSG00000024806	-0.982624	0.0414544	0.152429
ENSMUSG00000024807	0.53295	0.000513291	0.00431862
ENSMUSG00000024810	1.01127	0.000235287	0.00218776
ENSMUSG00000024812	-0.380738	0.0124911	0.0617992
ENSMUSG00000024817	0.349082	0.0262355	0.108783
ENSMUSG00000024818	0.472362	0.0460229	0.164917
ENSMUSG00000024830	0.379696	0.0242398	0.102075
ENSMUSG00000024833	0.538118	0.00528604	0.0309854
ENSMUSG00000024835	0.614482	6.35002e-05	0.000694463
ENSMUSG00000024851	0.505149	0.00176102	0.0124478
ENSMUSG00000024856	0.377138	0.0409084	0.150985
ENSMUSG00000024858	0.372967	0.0184386	0.0831366
ENSMUSG00000024883	0.516146	0.0162929	0.0756508
ENSMUSG00000024892	0.535485	0.000571521	0.00472957
ENSMUSG00000024897	0.634218	0.000508058	0.00428457
ENSMUSG00000024899	-0.758764	1.10522e-05	0.000147533
ENSMUSG00000024913	-0.350477	0.0129261	0.0635741
ENSMUSG00000024914	-0.420789	0.044047	0.159616
ENSMUSG00000024921	-0.732306	2.74611e-06	4.17436e-05
ENSMUSG00000024924	-0.766839	5.69781e-06	8.06291e-05
ENSMUSG00000024926	-0.32244	0.0465351	0.166202
ENSMUSG00000024937	0.751732	5.4186e-07	9.54423e-06
ENSMUSG00000024942	0.358346	0.0272432	0.111806
ENSMUSG00000024944	-0.396552	0.0443096	0.160451
ENSMUSG00000024952	0.384464	0.0220061	0.0947648
ENSMUSG00000024965	1.38835	3.01893e-10	8.64005e-09
ENSMUSG00000024968	0.702277	0.0122525	0.0609389
ENSMUSG00000024972	0.435039	0.0395324	0.147185
ENSMUSG00000024985	0.405543	0.0188802	0.0845691
ENSMUSG00000024989	2.62335	4.60609e-22	3.94431e-20
ENSMUSG00000024998	-0.596479	0.00199108	0.0137685
ENSMUSG00000025001	2.40429	1.15143e-24	1.22886e-22
ENSMUSG00000025006	-0.565213	0.0015662	0.0112543
ENSMUSG00000025007	1.18058	1.83901e-10	5.48791e-09
ENSMUSG00000025017	0.93312	4.42079e-08	9.41755e-07
ENSMUSG00000025026	-0.433905	0.00106044	0.0080106
ENSMUSG00000025035	-0.593215	0.00266186	0.01748
ENSMUSG00000025036	-0.449212	0.0162352	0.0754471
ENSMUSG00000025037	-0.462245	0.00214035	0.0146427
ENSMUSG00000025038	-0.93811	0.0163946	0.076025
ENSMUSG00000025044	2.60493	3.88024e-21	3.06808e-19
ENSMUSG00000025058	1.2785	9.25569e-05	0.000966384
ENSMUSG00000025064	-1.09114	2.1953e-09	5.57576e-08
ENSMUSG00000025068	0.73489	2.40107e-05	0.000294726
ENSMUSG00000025069	-0.957436	0.00434759	0.0263913
ENSMUSG00000025082	-1.28125	0.0187843	0.0842398
ENSMUSG00000025089	-0.879614	9.43699e-05	0.00098389
ENSMUSG00000025092	-0.431161	0.0219671	0.0946722
ENSMUSG00000025128	0.812857	0.00428335	0.0260744
ENSMUSG00000025130	0.33382	0.0227294	0.0972611
ENSMUSG00000025140	2.11216	1.59776e-10	4.81439e-09
ENSMUSG00000025147	-0.372419	0.0395193	0.147185
ENSMUSG00000025150	-0.702196	7.88663e-05	0.000840038
ENSMUSG00000025154	2.23852	7.04751e-16	3.73311e-14
ENSMUSG00000025161	1.20005	2.95994e-07	5.5092e-06
ENSMUSG00000025163	0.715112	0.0105189	0.0540669
ENSMUSG00000025165	1.70362	0.00151176	0.0109102
ENSMUSG00000025171	0.671942	0.000192808	0.00184668
ENSMUSG00000025178	0.498483	0.000643138	0.00524213
ENSMUSG00000025185	0.846095	0.0023943	0.0160496
ENSMUSG00000025188	0.697556	0.00289475	0.0186929
ENSMUSG00000025192	0.806232	7.28489e-07	1.24078e-05
ENSMUSG00000025213	-0.619146	0.0040711	0.0250143
ENSMUSG00000025217	-0.542681	0.00160528	0.0114856
ENSMUSG00000025221	-1.00832	0.0199565	0.0883804
ENSMUSG00000025225	0.965621	3.01855e-09	7.5429e-08
ENSMUSG00000025226	0.428997	0.0239288	0.101074
ENSMUSG00000025227	0.753852	0.000219629	0.00206522
ENSMUSG00000025232	1.14547	2.21294e-11	7.35328e-10
ENSMUSG00000025235	-0.641155	0.000752907	0.006008
ENSMUSG00000025241	-0.408006	0.0200479	0.0886224
ENSMUSG00000025255	-0.701507	0.0146948	0.0697703
ENSMUSG00000025268	-0.373684	0.0312422	0.123718
ENSMUSG00000025270	-2.13157	8.6116e-23	7.97309e-21
ENSMUSG00000025272	-0.900789	0.00187274	0.0131092
ENSMUSG00000025279	2.34217	7.9963e-18	5.06549e-16
ENSMUSG00000025289	0.652604	1.19499e-05	0.000158346
ENSMUSG00000025314	1.03825	1.17804e-06	1.91897e-05
ENSMUSG00000025321	1.07286	0.000146581	0.00145074
ENSMUSG00000025323	-0.70737	0.00758308	0.0413922
ENSMUSG00000025324	0.68136	0.000250478	0.0023092
ENSMUSG00000025337	-0.858209	3.1928e-07	5.89702e-06
ENSMUSG00000025348	0.831892	9.94081e-06	0.000134185
ENSMUSG00000025351	0.584719	0.000122953	0.00124709
ENSMUSG00000025352	0.746502	0.0147834	0.0700529
ENSMUSG00000025354	-1.0767	2.31636e-10	6.76334e-09
ENSMUSG00000025355	1.88566	1.06221e-37	2.64515e-35
ENSMUSG00000025357	-0.363531	0.0344067	0.133159
ENSMUSG00000025366	0.461335	0.00460301	0.0276321
ENSMUSG00000025377	0.557007	0.00104032	0.00786683
ENSMUSG00000025395	0.895513	5.58354e-05	0.000620345
ENSMUSG00000025403	0.53378	0.000742812	0.00593401
ENSMUSG00000025407	0.520321	0.0105123	0.054046
ENSMUSG00000025409	0.438399	0.0304994	0.121532
ENSMUSG00000025421	-0.380512	0.0154991	0.0728231
ENSMUSG00000025422	1.26875	2.9295e-07	5.46663e-06
ENSMUSG00000025429	0.918235	8.53642e-06	0.000116682
ENSMUSG00000025453	-0.386535	0.0267797	0.110448
ENSMUSG00000025461	0.698177	0.0260631	0.108213
ENSMUSG00000025464	0.519751	0.0164956	0.0764115
ENSMUSG00000025465	-0.399904	0.017864	0.0811151
ENSMUSG00000025466	0.600767	0.0176036	0.0802403
ENSMUSG00000025469	6.15128	3.51159e-46	1.3117e-43
ENSMUSG00000025473	2.5674	1.45448e-22	1.31297e-20
ENSMUSG00000025477	-0.718536	1.38457e-06	2.22693e-05
ENSMUSG00000025479	-0.678774	0.045699	0.164082
ENSMUSG00000025484	-0.420882	0.0123631	0.0613393
ENSMUSG00000025488	-2.61495	3.04707e-07	5.65194e-06
ENSMUSG00000025492	-0.365658	0.042674	0.155881
ENSMUSG00000025498	1.29269	3.29241e-07	6.05006e-06
ENSMUSG00000025504	-0.477412	0.0016717	0.011894
ENSMUSG00000025505	-0.368598	0.0273305	0.112122
ENSMUSG00000025507	1.38888	8.96163e-09	2.07208e-07
ENSMUSG00000025509	-0.393452	0.0314933	0.124553
ENSMUSG00000025511	0.493391	0.0075756	0.0413922
ENSMUSG00000025512	0.384859	0.0136356	0.0660737
ENSMUSG00000025521	0.325392	0.0485759	0.171094
ENSMUSG00000025534	1.13521	2.56972e-15	1.30688e-13
ENSMUSG00000025537	-2.05257	1.6208e-05	0.000209389
ENSMUSG00000025551	-1.23261	0.00899674	0.047459
ENSMUSG00000025557	0.761029	0.00193035	0.0134343
ENSMUSG00000025558	-0.503996	0.0023336	0.0157206
ENSMUSG00000025574	2.82038	1.34486e-39	3.78395e-37
ENSMUSG00000025576	-1.46158	1.46579e-06	2.34711e-05
ENSMUSG00000025597	-0.532888	0.0197078	0.087458
ENSMUSG00000025610	1.09565	6.62361e-05	0.000718699
ENSMUSG00000025612	0.394291	0.00659831	0.0370343
ENSMUSG00000025648	0.857085	1.79802e-07	3.45951e-06
ENSMUSG00000025656	-0.446692	0.0110405	0.0561526
ENSMUSG00000025665	-0.589565	0.00413722	0.0253594
ENSMUSG00000025666	-0.53325	0.0013036	0.00958674
ENSMUSG00000025701	0.624278	0.00283537	0.0184138
ENSMUSG00000025733	0.432027	0.0217418	0.093944
ENSMUSG00000025746	2.5244	1.07487e-08	2.46425e-07
ENSMUSG00000025747	1.31397	1.50913e-10	4.56001e-09
ENSMUSG00000025758	1.34432	8.75528e-11	2.72142e-09
ENSMUSG00000025776	-0.759679	0.00157731	0.0113191
ENSMUSG00000025779	0.89282	0.00132515	0.00972207
ENSMUSG00000025782	-0.499293	0.000650805	0.00529665
ENSMUSG00000025784	-0.392464	0.0218247	0.0942083
ENSMUSG00000025786	-0.315874	0.0450276	0.162479
ENSMUSG00000025787	-0.924932	0.0370426	0.140425
ENSMUSG00000025790	-0.532767	0.000836698	0.0065507
ENSMUSG00000025795	-0.389249	0.0136333	0.0660737
ENSMUSG00000025804	2.52429	5.42201e-36	1.2365e-33
ENSMUSG00000025808	1.58905	4.01258e-10	1.13046e-08
ENSMUSG00000025810	-0.702175	0.000235602	0.00218882
ENSMUSG00000025812	-0.384878	0.013468	0.0655548
ENSMUSG00000025821	0.468766	0.0383779	0.143975
ENSMUSG00000025823	0.42454	0.0139163	0.0671484
ENSMUSG00000025854	1.29795	4.8193e-13	1.92639e-11
ENSMUSG00000025855	-0.683946	0.000823724	0.00648002
ENSMUSG00000025856	-0.774581	1.49274e-05	0.000193886
ENSMUSG00000025871	-0.360462	0.0273859	0.112285
ENSMUSG00000025876	0.986061	0.0155211	0.072911
ENSMUSG00000025877	1.33423	5.91484e-14	2.55269e-12
ENSMUSG00000025880	-0.498641	0.00253486	0.0168511
ENSMUSG00000025885	-0.55768	0.000703723	0.00567405
ENSMUSG00000025887	0.542931	0.00831544	0.0445815
ENSMUSG00000025888	0.753834	0.000903316	0.00697944
ENSMUSG00000025889	-2.19663	1.17845e-16	6.82651e-15
ENSMUSG00000025903	1.26486	0.000126965	0.00128417
ENSMUSG00000025912	1.03735	0.000850421	0.00663463
ENSMUSG00000025915	0.737211	0.000940976	0.00721893
ENSMUSG00000025929	3.92222	1.12645e-13	4.7572e-12
ENSMUSG00000025930	1.23341	0.00083207	0.006522
ENSMUSG00000025932	-0.484637	0.0279321	0.114007
ENSMUSG00000025933	-0.392737	0.0303276	0.121115
ENSMUSG00000025934	-1.38907	1.2977e-11	4.4415e-10
ENSMUSG00000025936	-1.36128	6.66511e-09	1.58159e-07
ENSMUSG00000025938	-0.738102	0.00863879	0.0459851
ENSMUSG00000025949	0.679341	0.00021765	0.00204839
ENSMUSG00000025950	0.529884	0.000345681	0.0030481
ENSMUSG00000025955	1.04809	0.0334545	NA
ENSMUSG00000025959	-0.487341	0.00746736	0.0409356
ENSMUSG00000025969	0.473619	0.00238902	0.0160192
ENSMUSG00000025978	-1.00401	4.15628e-10	1.16791e-08
ENSMUSG00000026000	-0.466885	0.0025947	0.0171594
ENSMUSG00000026009	2.20899	1.28745e-27	1.62166e-25
ENSMUSG00000026011	2.81643	1.00898e-21	8.40753e-20
ENSMUSG00000026012	1.02161	4.54851e-08	9.67061e-07
ENSMUSG00000026039	2.55846	2.3499e-16	1.31213e-14
ENSMUSG00000026042	1.0014	2.00585e-09	5.13065e-08
ENSMUSG00000026043	1.35099	3.65122e-15	1.82027e-13
ENSMUSG00000026048	-0.615261	0.000510283	0.00429665
ENSMUSG00000026062	-0.821247	0.00147056	0.0106448
ENSMUSG00000026065	0.921245	3.45752e-05	0.000406866
ENSMUSG00000026068	0.446316	0.0154285	0.0725702
ENSMUSG00000026069	1.34991	5.00872e-11	1.59111e-09
ENSMUSG00000026070	-0.549365	0.00294931	0.0189943
ENSMUSG00000026072	0.358439	0.0337343	0.131166
ENSMUSG00000026073	2.13981	1.99324e-15	1.02089e-13
ENSMUSG00000026077	-0.865634	0.00132674	0.00972718
ENSMUSG00000026078	-0.486004	0.00227462	0.0153759
ENSMUSG00000026080	1.43938	1.5524e-07	3.0218e-06
ENSMUSG00000026095	0.569327	0.00165713	0.0118137
ENSMUSG00000026107	0.697318	0.0311443	0.123489
ENSMUSG00000026109	-0.772293	4.31552e-05	0.000496261
ENSMUSG00000026110	0.916186	1.3988e-07	2.74999e-06
ENSMUSG00000026117	0.936299	5.87115e-05	0.00064798
ENSMUSG00000026121	-0.316981	0.0487161	0.171393
ENSMUSG00000026126	0.382753	0.0475552	0.16865
ENSMUSG00000026134	0.828744	1.29278e-07	2.55781e-06
ENSMUSG00000026155	-0.317801	0.0359407	0.137206
ENSMUSG00000026158	0.413954	0.0198367	0.0879218
ENSMUSG00000026163	-1.52581	4.73671e-06	6.82773e-05
ENSMUSG00000026166	1.58369	0.000569002	0.00471052
ENSMUSG00000026174	1.22288	0.000136882	0.0013685
ENSMUSG00000026177	1.60633	4.67388e-11	1.49564e-09
ENSMUSG00000026180	0.484166	0.0301168	0.120495
ENSMUSG00000026181	-0.503724	0.0287539	0.116375
ENSMUSG00000026193	1.29269	3.62415e-13	1.47312e-11
ENSMUSG00000026196	2.05013	4.89252e-14	2.12844e-12
ENSMUSG00000026198	-0.391096	0.0276915	0.113195
ENSMUSG00000026202	-0.425207	0.00551444	0.0320494
ENSMUSG00000026213	0.475342	0.00296744	0.0190884
ENSMUSG00000026228	1.06465	0.0060906	0.0347427
ENSMUSG00000026229	-0.335102	0.0489768	0.172058
ENSMUSG00000026235	-0.545125	0.000828427	0.00650567
ENSMUSG00000026237	1.33484	2.42045e-05	0.000296769
ENSMUSG00000026241	1.05315	0.0477093	0.169058
ENSMUSG00000026271	2.06993	6.65575e-25	7.17397e-23
ENSMUSG00000026274	1.74237	1.05521e-11	3.6403e-10
ENSMUSG00000026278	0.404691	0.0463466	0.16578
ENSMUSG00000026283	-0.354263	0.0193878	0.0862853
ENSMUSG00000026285	3.50178	2.09885e-26	2.47128e-24
ENSMUSG00000026288	0.493843	0.00168996	0.0119925
ENSMUSG00000026301	-0.827613	0.000938368	0.00720147
ENSMUSG00000026303	0.622723	3.17936e-05	0.000378588
ENSMUSG00000026307	0.431947	0.00972265	0.0506228
ENSMUSG00000026308	-1.31929	0.00696887	0.0387175
ENSMUSG00000026309	-0.323489	0.0438121	0.158993
ENSMUSG00000026311	-0.848183	0.0102801	0.0530471
ENSMUSG00000026317	0.617109	2.89954e-05	0.000348217
ENSMUSG00000026321	1.50547	4.24427e-13	1.71233e-11
ENSMUSG00000026335	-0.773084	3.20701e-05	0.00038092
ENSMUSG00000026341	0.861176	0.000645901	0.0052607
ENSMUSG00000026349	0.363882	0.0483421	0.170575
ENSMUSG00000026355	1.89561	2.28591e-28	3.09526e-26
ENSMUSG00000026358	2.37951	1.54403e-11	5.24315e-10
ENSMUSG00000026383	-0.354953	0.0281962	0.11476
ENSMUSG00000026389	0.662119	0.00360442	0.0225302
ENSMUSG00000026395	1.17007	4.18536e-09	1.01655e-07
ENSMUSG00000026405	1.46786	0.00728829	0.040209
ENSMUSG00000026414	-1.81403	0.00076999	0.00611504
ENSMUSG00000026415	2.1739	6.08313e-10	1.67673e-08
ENSMUSG00000026417	2.79804	1.72203e-43	5.52335e-41
ENSMUSG00000026424	-1.05	0.0316971	0.125245
ENSMUSG00000026429	1.86724	4.5255e-10	1.2651e-08
ENSMUSG00000026437	-0.494881	0.00422876	0.0257999
ENSMUSG00000026442	2.36751	5.69234e-06	8.06043e-05
ENSMUSG00000026443	-0.550491	0.0464966	0.16612
ENSMUSG00000026447	0.518783	0.00147047	0.0106448
ENSMUSG00000026456	-0.405238	0.0211491	0.0920071
ENSMUSG00000026458	1.41797	4.55448e-10	1.27156e-08
ENSMUSG00000026463	-0.357241	0.0465143	0.166155
ENSMUSG00000026473	-0.428801	0.00324387	0.0205432
ENSMUSG00000026475	2.47058	2.90373e-12	1.07722e-10
ENSMUSG00000026480	1.36655	1.25758e-10	3.83199e-09
ENSMUSG00000026483	0.34896	0.0408417	0.150816
ENSMUSG00000026509	-0.432484	0.0070606	0.0391122
ENSMUSG00000026510	-0.577769	3.7116e-05	0.000434659
ENSMUSG00000026532	-1.45224	5.97997e-08	1.25054e-06
ENSMUSG00000026535	2.20275	3.29359e-11	1.07951e-09
ENSMUSG00000026544	-0.503207	0.0240863	0.101563
ENSMUSG00000026548	1.78585	3.37789e-21	2.68066e-19
ENSMUSG00000026554	-0.311738	0.0311311	0.123481
ENSMUSG00000026558	0.381025	0.0146809	0.0697199
ENSMUSG00000026566	-0.345638	0.0319206	0.125921
ENSMUSG00000026571	-0.351989	0.0377871	0.142425
ENSMUSG00000026573	1.91644	0.000343337	0.00303113
ENSMUSG00000026575	0.322105	0.0482915	0.170452
ENSMUSG00000026579	0.913919	3.47266e-05	0.000408
ENSMUSG00000026580	2.58545	2.65737e-26	3.09527e-24
ENSMUSG00000026581	-0.665927	0.0141294	0.0679047
ENSMUSG00000026582	2.24253	2.21182e-10	6.51074e-09
ENSMUSG00000026585	-0.359644	0.0194325	0.0864578
ENSMUSG00000026596	0.827965	0.020722	0.0907135
ENSMUSG00000026600	0.438465	0.00534769	0.031296
ENSMUSG00000026602	0.453098	0.0288667	0.116722
ENSMUSG00000026604	-0.526096	0.00136188	0.00994443
ENSMUSG00000026605	2.85304	9.96845e-14	4.23464e-12
ENSMUSG00000026611	-0.667847	0.0429008	0.156472
ENSMUSG00000026616	0.910579	4.81952e-05	0.000546686
ENSMUSG00000026622	1.1133	2.94611e-09	7.37889e-08
ENSMUSG00000026628	1.59926	1.04052e-11	3.59535e-10
ENSMUSG00000026630	2.18996	1.76192e-12	6.70862e-11
ENSMUSG00000026638	-0.562642	0.000712677	0.00573557
ENSMUSG00000026639	-0.322147	0.0463481	0.16578
ENSMUSG00000026646	0.894827	0.00019951	0.00190246
ENSMUSG00000026648	0.663138	0.0131357	0.0643712
ENSMUSG00000026655	-0.705327	0.0172027	0.0788109
ENSMUSG00000026656	4.23118	3.72636e-114	1.61463e-110
ENSMUSG00000026657	0.346471	0.0233931	0.0993163
ENSMUSG00000026669	2.69082	7.29148e-23	6.83852e-21
ENSMUSG00000026679	-0.607555	0.0395575	0.147253
ENSMUSG00000026683	3.31971	7.4049e-47	2.86477e-44
ENSMUSG00000026691	-2.1902	2.42468e-17	1.50088e-15
ENSMUSG00000026692	-0.720561	0.00179566	0.0126514
ENSMUSG00000026700	2.93351	1.07188e-08	2.46e-07
ENSMUSG00000026701	-1.13586	5.79472e-10	1.60131e-08
ENSMUSG00000026708	0.481182	0.0307542	0.122257
ENSMUSG00000026712	2.12073	2.00309e-19	1.45141e-17
ENSMUSG00000026725	-0.630839	0.00059386	0.00489326
ENSMUSG00000026728	0.547846	0.00621059	0.0352311
ENSMUSG00000026737	0.767204	2.70557e-06	4.12209e-05
ENSMUSG00000026749	0.872224	7.26428e-07	1.23824e-05
ENSMUSG00000026764	0.648223	0.0272178	0.111744
ENSMUSG00000026768	-0.807251	1.83418e-06	2.88791e-05
ENSMUSG00000026770	2.20161	1.01589e-27	1.28709e-25
ENSMUSG00000026779	2.73927	2.09511e-22	1.86027e-20
ENSMUSG00000026784	0.841964	0.00019805	0.0018902
ENSMUSG00000026786	1.00397	9.08426e-08	1.84972e-06
ENSMUSG00000026809	-0.74204	0.00777594	0.0421692
ENSMUSG00000026814	-0.583197	0.000669331	0.00543111
ENSMUSG00000026815	0.892154	0.0382864	0.143707
ENSMUSG00000026821	0.448664	0.0132979	0.0649394
ENSMUSG00000026822	3.31565	1.59671e-55	8.43724e-53
ENSMUSG00000026824	-1.09949	0.0352223	0.135372
ENSMUSG00000026826	-0.77615	0.000172477	0.00167341
ENSMUSG00000026833	0.973484	7.49585e-11	2.34679e-09
ENSMUSG00000026836	-0.336321	0.027319	0.112096
ENSMUSG00000026840	-0.642108	0.00139767	0.0101683
ENSMUSG00000026851	-0.432792	0.0092404	0.0484898
ENSMUSG00000026853	0.340461	0.0458287	0.164438
ENSMUSG00000026856	0.573884	0.000249754	0.00230448
ENSMUSG00000026864	0.500319	0.00219319	0.0149419
ENSMUSG00000026866	1.87829	2.50554e-14	1.11692e-12
ENSMUSG00000026872	0.58544	0.00133228	0.00976122
ENSMUSG00000026873	2.15383	3.75947e-28	4.9664e-26
ENSMUSG00000026874	0.574902	0.00639298	0.0360085
ENSMUSG00000026879	-0.82896	2.98932e-07	5.55911e-06
ENSMUSG00000026888	-0.538802	0.00050729	0.0042798
ENSMUSG00000026889	-0.33574	0.0227095	0.0972232
ENSMUSG00000026890	0.598015	0.0285215	0.115672
ENSMUSG00000026918	-0.361063	0.0209888	0.0915118
ENSMUSG00000026921	-0.551702	0.00228284	0.015417
ENSMUSG00000026923	-0.514613	0.003415	0.0215201
ENSMUSG00000026938	1.84215	3.04447e-08	6.60907e-07
ENSMUSG00000026939	0.522642	0.02046	0.0899485
ENSMUSG00000026941	-2.73101	2.57614e-30	4.01526e-28
ENSMUSG00000026946	-0.370536	0.0482019	0.170219
ENSMUSG00000026950	1.75852	1.99576e-06	3.12415e-05
ENSMUSG00000026955	2.44422	4.01872e-12	1.47319e-10
ENSMUSG00000026958	0.996595	4.95514e-05	0.000560005
ENSMUSG00000026965	-0.364457	0.0204688	0.0899541
ENSMUSG00000026979	0.660737	3.94931e-05	0.000459269
ENSMUSG00000026980	1.00455	6.36628e-11	2.00765e-09
ENSMUSG00000026981	0.872509	7.94073e-07	1.3388e-05
ENSMUSG00000026991	-0.597742	0.000171593	0.00166707
ENSMUSG00000026999	-0.385918	0.0172202	0.0788742
ENSMUSG00000027009	0.994388	3.03693e-07	5.64281e-06
ENSMUSG00000027011	-0.401553	0.00916259	0.0482044
ENSMUSG00000027016	1.0235	1.75286e-05	0.000224443
ENSMUSG00000027018	0.598226	0.0014492	0.0105007
ENSMUSG00000027068	2.19788	2.59746e-17	1.60325e-15
ENSMUSG00000027070	0.519287	0.00608403	0.0347235
ENSMUSG00000027073	2.79896	3.87606e-10	1.09342e-08
ENSMUSG00000027074	-0.443606	0.00524933	0.0308202
ENSMUSG00000027087	1.30701	7.0135e-05	0.000756183
ENSMUSG00000027108	0.346506	0.0427462	0.15604
ENSMUSG00000027115	1.28688	0.00064264	0.00524004
ENSMUSG00000027130	-0.671928	0.000258095	0.00237336
ENSMUSG00000027133	-0.447416	0.00574615	0.0331091
ENSMUSG00000027165	-0.453768	0.0225397	0.0966595
ENSMUSG00000027187	-0.539012	0.000394662	0.00342151
ENSMUSG00000027188	-0.602221	0.000754913	0.00601958
ENSMUSG00000027199	3.2526	5.35617e-71	4.29783e-68
ENSMUSG00000027203	0.676098	5.3286e-05	0.000594154
ENSMUSG00000027204	0.510142	0.02961	0.118862
ENSMUSG00000027206	0.441881	0.0478898	0.169421
ENSMUSG00000027208	-0.655383	0.00125341	0.00927431
ENSMUSG00000027210	-0.744183	1.70708e-05	0.000219489
ENSMUSG00000027217	-0.767988	1.31911e-05	0.000172785
ENSMUSG00000027219	1.35062	4.30541e-06	6.26439e-05
ENSMUSG00000027220	3.00643	5.75258e-10	1.59169e-08
ENSMUSG00000027221	-0.5245	0.00586409	0.0336723
ENSMUSG00000027224	1.68594	0.0022801	0.0154033
ENSMUSG00000027230	0.777168	4.92661e-05	0.000557072
ENSMUSG00000027238	-0.581167	0.045616	0.163919
ENSMUSG00000027239	0.99833	7.17228e-05	0.000771154
ENSMUSG00000027242	0.792227	0.000700311	0.00564864
ENSMUSG00000027248	0.407433	0.0150327	0.0709901
ENSMUSG00000027253	-0.532925	0.000630895	0.00515592
ENSMUSG00000027254	0.557425	0.00251156	0.016727
ENSMUSG00000027263	0.400427	0.0204797	0.089962
ENSMUSG00000027276	-0.460116	0.00721436	0.0398519
ENSMUSG00000027281	1.44024	8.38131e-06	0.000114852
ENSMUSG00000027293	-0.716455	1.41037e-06	2.26506e-05
ENSMUSG00000027304	-0.333162	0.0279573	0.114067
ENSMUSG00000027306	2.84709	1.93138e-44	6.53802e-42
ENSMUSG00000027309	-0.330426	0.0497677	0.17385
ENSMUSG00000027314	-0.911232	3.14358e-09	7.81926e-08
ENSMUSG00000027322	1.92249	9.51068e-23	8.75043e-21
ENSMUSG00000027323	2.79535	1.97519e-28	2.70839e-26
ENSMUSG00000027326	4.12014	1.97777e-23	1.90438e-21
ENSMUSG00000027327	0.409941	0.0217247	0.0939397
ENSMUSG00000027330	0.611705	0.000284185	0.00257825
ENSMUSG00000027331	2.33503	3.79679e-18	2.51552e-16
ENSMUSG00000027332	-0.451125	0.0165102	0.0764629
ENSMUSG00000027335	-0.878486	0.00010572	0.00108757
ENSMUSG00000027342	0.698165	4.83063e-06	6.94924e-05
ENSMUSG00000027346	0.739937	0.01901	0.0850232
ENSMUSG00000027347	1.28814	9.18094e-11	2.8415e-09
ENSMUSG00000027353	1.0033	0.000138044	0.00137885
ENSMUSG00000027359	1.16344	0.000824798	0.00648505
ENSMUSG00000027360	0.329325	0.0331827	0.129555
ENSMUSG00000027366	0.329169	0.035005	0.134896
ENSMUSG00000027368	1.19655	1.29887e-05	0.000170546
ENSMUSG00000027376	-0.646845	0.00769144	0.0418576
ENSMUSG00000027379	2.59306	1.82044e-25	2.01224e-23
ENSMUSG00000027380	-1.10413	1.27004e-11	4.35371e-10
ENSMUSG00000027398	0.736162	0.000467316	0.00397347
ENSMUSG00000027408	1.3733	1.493e-14	6.83846e-13
ENSMUSG00000027420	0.724227	0.0171587	0.0786425
ENSMUSG00000027423	0.948757	2.57848e-07	4.85764e-06
ENSMUSG00000027428	-0.382066	0.0196817	0.0873672
ENSMUSG00000027430	-0.743824	0.000261992	0.00240409
ENSMUSG00000027446	-0.729934	1.24956e-06	2.0248e-05
ENSMUSG00000027447	-0.409184	0.00821462	0.0441503
ENSMUSG00000027454	1.31897	2.90651e-07	5.43309e-06
ENSMUSG00000027460	-1.45938	3.2774e-06	4.88678e-05
ENSMUSG00000027469	2.80625	8.54799e-31	1.39242e-28
ENSMUSG00000027472	-0.606009	0.00299187	0.019217
ENSMUSG00000027485	5.84056	1.62582e-76	1.76117e-73
ENSMUSG00000027490	0.681172	0.000674682	0.00547043
ENSMUSG00000027495	-0.438614	0.0216072	0.0935533
ENSMUSG00000027496	2.30455	4.13314e-31	7.05075e-29
ENSMUSG00000027506	0.689842	1.22603e-05	0.000161963
ENSMUSG00000027514	1.98148	5.19244e-25	5.62471e-23
ENSMUSG00000027523	-0.460686	0.00978995	0.0508997
ENSMUSG00000027524	-0.834673	2.76777e-07	5.18718e-06
ENSMUSG00000027530	-0.684472	0.0282321	0.114842
ENSMUSG00000027533	0.870522	3.39821e-07	6.21285e-06
ENSMUSG00000027536	-0.548664	0.00159247	0.0114024
ENSMUSG00000027540	0.714124	1.66459e-06	2.64393e-05
ENSMUSG00000027544	1.26712	6.54264e-11	2.06026e-09
ENSMUSG00000027546	-0.405714	0.00715796	0.0395807
ENSMUSG00000027555	1.72495	2.82335e-19	2.02542e-17
ENSMUSG00000027560	1.73501	0.0013745	NA
ENSMUSG00000027574	-0.806886	0.000129456	0.00130389
ENSMUSG00000027601	-0.323522	0.0474085	0.168321
ENSMUSG00000027602	-0.4726	0.00806446	0.0434835
ENSMUSG00000027605	-0.3844	0.0135713	0.0658506
ENSMUSG00000027610	-0.602126	0.000809247	0.00638236
ENSMUSG00000027630	1.19862	1.97507e-12	7.48076e-11
ENSMUSG00000027635	0.799499	0.000721938	0.00579288
ENSMUSG00000027641	1.04271	3.52415e-12	1.29848e-10
ENSMUSG00000027646	0.438929	0.0145448	0.0693013
ENSMUSG00000027654	2.02959	8.1469e-09	1.89381e-07
ENSMUSG00000027668	-0.309871	0.0321556	0.126526
ENSMUSG00000027670	3.11834	3.46179e-17	2.11267e-15
ENSMUSG00000027674	-1.12089	0.0284703	0.115486
ENSMUSG00000027678	0.453719	0.00561101	0.032486
ENSMUSG00000027692	-0.599143	0.0107415	0.0549759
ENSMUSG00000027699	2.29868	5.30817e-31	8.98449e-29
ENSMUSG00000027706	-0.662441	0.00182632	0.0128298
ENSMUSG00000027712	-0.561187	4.50067e-05	0.000515093
ENSMUSG00000027715	3.27928	2.21445e-38	5.78025e-36
ENSMUSG00000027718	3.0188	1.01726e-08	2.33958e-07
ENSMUSG00000027737	2.20892	2.00893e-22	1.79109e-20
ENSMUSG00000027739	-0.770269	0.00888793	0.0469995
ENSMUSG00000027775	0.55078	0.000746748	0.00596325
ENSMUSG00000027777	-0.666867	0.000548393	0.00456082
ENSMUSG00000027784	-0.456923	0.00629034	0.0355452
ENSMUSG00000027793	1.26824	0.0022869	0.0154396
ENSMUSG00000027796	-0.786121	9.60929e-07	1.59407e-05
ENSMUSG00000027797	1.84921	9.38496e-12	3.26365e-10
ENSMUSG00000027800	-1.12442	3.45462e-12	1.27503e-10
ENSMUSG00000027803	-0.502695	0.00222315	0.0151223
ENSMUSG00000027811	0.967156	0.000286964	0.0025943
ENSMUSG00000027831	0.516966	0.00263917	0.017374
ENSMUSG00000027832	1.73227	6.29747e-08	1.31061e-06
ENSMUSG00000027840	-0.624138	0.00249421	0.0166319
ENSMUSG00000027843	1.267	2.74147e-10	7.90866e-09
ENSMUSG00000027848	-0.4378	0.0219742	0.0946841
ENSMUSG00000027849	-0.987836	0.00206809	0.0142374
ENSMUSG00000027852	1.1244	0.000259696	0.00238605
ENSMUSG00000027855	0.935575	0.00420919	0.0256879
ENSMUSG00000027857	-1.35163	6.54271e-08	1.35774e-06
ENSMUSG00000027861	-1.8103	0.00098745	0.00751426
ENSMUSG00000027863	0.748308	0.000212544	0.00200819
ENSMUSG00000027875	-0.931233	5.52676e-07	9.70318e-06
ENSMUSG00000027884	-0.309021	0.0292308	0.117689
ENSMUSG00000027889	0.563221	0.00150406	0.0108618
ENSMUSG00000027894	0.782887	0.0041646	0.0254876
ENSMUSG00000027901	0.47493	0.00472626	0.0282467
ENSMUSG00000027931	-0.289848	0.0401842	0.148895
ENSMUSG00000027938	0.718466	0.00586019	0.0336588
ENSMUSG00000027944	-0.539144	0.0182092	0.0822926
ENSMUSG00000027950	0.956425	0.015118	0.0713267
ENSMUSG00000027954	-0.870869	9.13091e-08	1.85573e-06
ENSMUSG00000027955	-0.436951	0.0234522	0.0994636
ENSMUSG00000027959	0.864461	0.00118806	0.00884813
ENSMUSG00000027962	0.602978	0.0018662	0.013076
ENSMUSG00000027968	-0.383007	0.0498676	0.174115
ENSMUSG00000027971	-0.615539	0.0227796	0.0974565
ENSMUSG00000027977	-1.66769	0.00110209	0.00828767
ENSMUSG00000027978	-0.519957	0.00293079	0.0188862
ENSMUSG00000027985	-0.546694	0.0119032	0.0595523
ENSMUSG00000027993	-0.391189	0.00843357	0.045061
ENSMUSG00000027994	1.17199	1.71631e-09	4.43721e-08
ENSMUSG00000027996	1.25157	8.5768e-05	0.000903336
ENSMUSG00000027998	-0.397069	0.00749511	0.0410366
ENSMUSG00000027999	-0.586964	0.00474558	0.0283387
ENSMUSG00000028003	-1.02092	5.42041e-08	1.14124e-06
ENSMUSG00000028007	0.454842	0.00540617	0.0315615
ENSMUSG00000028011	1.59608	4.65646e-08	9.85432e-07
ENSMUSG00000028013	-0.296794	0.0487474	0.171447
ENSMUSG00000028019	2.25493	3.97715e-28	5.22212e-26
ENSMUSG00000028028	0.675922	0.000138223	0.00138
ENSMUSG00000028029	-0.395507	0.0392524	0.146559
ENSMUSG00000028036	-1.01291	1.19814e-07	2.39242e-06
ENSMUSG00000028037	1.31948	2.95969e-07	5.5092e-06
ENSMUSG00000028041	0.668271	5.03928e-05	0.000567148
ENSMUSG00000028042	0.523558	0.0019014	0.013281
ENSMUSG00000028044	1.71721	2.27688e-20	1.74306e-18
ENSMUSG00000028047	-0.326896	0.0332965	0.129836
ENSMUSG00000028048	0.375657	0.0119765	0.0598411
ENSMUSG00000028049	0.359332	0.0344521	0.133274
ENSMUSG00000028057	-0.376628	0.0270373	0.111193
ENSMUSG00000028059	-0.317922	0.0287751	0.116417
ENSMUSG00000028064	1.09895	7.17957e-08	1.48421e-06
ENSMUSG00000028066	1.1271	7.449e-07	1.26475e-05
ENSMUSG00000028068	3.43565	2.64977e-31	4.62962e-29
ENSMUSG00000028071	1.4564	1.1436e-11	3.9327e-10
ENSMUSG00000028072	1.57163	0.000134402	0.0013462
ENSMUSG00000028088	-0.707515	1.01857e-05	0.000137064
ENSMUSG00000028104	-0.422374	0.0374517	0.141481
ENSMUSG00000028111	2.66715	2.74597e-22	2.39885e-20
ENSMUSG00000028116	-1.53644	0.00542587	0.0316509
ENSMUSG00000028125	-0.64031	0.000575442	0.00475838
ENSMUSG00000028132	0.681363	8.21607e-05	0.0008717
ENSMUSG00000028138	-0.366735	0.0178335	0.0810325
ENSMUSG00000028159	0.742624	1.17784e-06	1.91897e-05
ENSMUSG00000028161	-0.494422	0.00322437	0.0204437
ENSMUSG00000028163	0.307859	0.040592	0.149996
ENSMUSG00000028175	2.95609	7.15901e-16	3.78293e-14
ENSMUSG00000028197	2.66454	6.42533e-10	1.76432e-08
ENSMUSG00000028212	1.47354	2.32795e-09	5.89194e-08
ENSMUSG00000028214	-0.644349	6.29713e-05	0.000689723
ENSMUSG00000028217	2.13285	2.64e-05	0.000320963
ENSMUSG00000028223	-0.360805	0.0143923	0.0687863
ENSMUSG00000028238	1.71176	2.53033e-11	8.34392e-10
ENSMUSG00000028251	0.685286	6.43766e-05	0.000702984
ENSMUSG00000028255	1.34214	0.00910096	0.0479272
ENSMUSG00000028262	3.33938	7.2629e-10	1.97181e-08
ENSMUSG00000028268	0.409187	0.00894306	0.0472334
ENSMUSG00000028280	2.73129	3.49023e-07	6.35962e-06
ENSMUSG00000028291	-0.314879	0.0471698	0.167667
ENSMUSG00000028292	0.372726	0.0289028	0.116803
ENSMUSG00000028312	1.39462	3.04371e-07	5.65056e-06
ENSMUSG00000028327	2.27508	8.58279e-10	2.29563e-08
ENSMUSG00000028328	-0.991988	1.89965e-11	6.38075e-10
ENSMUSG00000028334	0.651854	6.26484e-05	0.000686534
ENSMUSG00000028337	1.35508	5.33398e-15	2.59105e-13
ENSMUSG00000028339	1.04423	4.68966e-06	6.76891e-05
ENSMUSG00000028341	0.578638	0.0180595	0.0817848
ENSMUSG00000028347	-0.518437	0.00198122	0.0137135
ENSMUSG00000028354	-1.11873	0.000901529	0.00697309
ENSMUSG00000028359	-1.42231	0.00978257	0.0508736
ENSMUSG00000028362	1.87954	5.66351e-15	2.73884e-13
ENSMUSG00000028364	0.897021	0.00266154	0.01748
ENSMUSG00000028367	-0.37654	0.019236	0.0857506
ENSMUSG00000028373	-0.450106	0.0269416	0.110926
ENSMUSG00000028382	0.602675	0.00242849	0.0162336
ENSMUSG00000028385	0.340067	0.0270856	0.111328
ENSMUSG00000028393	-0.405205	0.0208235	0.0910248
ENSMUSG00000028396	-1.45471	0.00843399	0.045061
ENSMUSG00000028402	-0.64939	0.000106481	0.00109228
ENSMUSG00000028403	0.477995	0.00989236	0.0513952
ENSMUSG00000028409	-0.309613	0.0462677	0.165575
ENSMUSG00000028411	-0.458612	0.00598826	0.0342773
ENSMUSG00000028413	0.578673	0.00123239	0.00913436
ENSMUSG00000028414	-0.616717	0.00392673	0.0242165
ENSMUSG00000028416	-0.537277	0.000140748	0.00140134
ENSMUSG00000028419	-0.443631	0.00352651	0.0221583
ENSMUSG00000028434	-0.738808	3.416e-07	6.23496e-06
ENSMUSG00000028435	2.12597	8.63223e-09	2.00018e-07
ENSMUSG00000028438	1.16554	1.06973e-05	0.000143237
ENSMUSG00000028439	-0.7385	0.00485685	0.0288759
ENSMUSG00000028444	-1.4528	5.90376e-12	2.10717e-10
ENSMUSG00000028445	-0.557409	0.00827162	0.0444016
ENSMUSG00000028453	0.499576	0.00444222	0.0268979
ENSMUSG00000028459	1.61236	6.87378e-22	5.81721e-20
[truncated: 4,325 more rows]

## Sheet: up
	asthma-up		copd-up		ACO-up
	ENSMUSG00000011752		ENSMUSG00000089960		ENSMUSG00000059796
	ENSMUSG00000049382		NewGene.10029		ENSMUSG00000030654
	ENSMUSG00000047139		ENSMUSG00000029417		ENSMUSG00000024413
	ENSMUSG00000073910		ENSMUSG00000095007		ENSMUSG00000033767
	ENSMUSG00000049401		ENSMUSG00000095794		ENSMUSG00000054874
	ENSMUSG00000073982		ENSMUSG00000096490		ENSMUSG00000069622
	ENSMUSG00000063904		ENSMUSG00000094345		ENSMUSG00000019261
	ENSMUSG00000025027		ENSMUSG00000113949		ENSMUSG00000006276
	ENSMUSG00000055172		ENSMUSG00000020651		ENSMUSG00000002968
	ENSMUSG00000024764		ENSMUSG00000094164		ENSMUSG00000048154
	ENSMUSG00000054676		ENSMUSG00000060989		ENSMUSG00000030279
	ENSMUSG00000031278		ENSMUSG00000105606		ENSMUSG00000023923
	ENSMUSG00000022440		ENSMUSG00000076672		ENSMUSG00000036712
	ENSMUSG00000030104		ENSMUSG00000096336		ENSMUSG00000003644
	ENSMUSG00000034120		ENSMUSG00000030077		ENSMUSG00000028163
	ENSMUSG00000022965		ENSMUSG00000076617		ENSMUSG00000059273
	ENSMUSG00000039183		ENSMUSG00000048521		ENSMUSG00000021306
	ENSMUSG00000007038		ENSMUSG00000053080		ENSMUSG00000022952
	ENSMUSG00000035852		ENSMUSG00000087642		ENSMUSG00000003680
	ENSMUSG00000042660		ENSMUSG00000108487		ENSMUSG00000038534
	ENSMUSG00000027901		ENSMUSG00000096805		ENSMUSG00000022906
	ENSMUSG00000018761		ENSMUSG00000094094		ENSMUSG00000052459
	ENSMUSG00000029715		ENSMUSG00000096498		ENSMUSG00000022350
	ENSMUSG00000028645		ENSMUSG00000009185		ENSMUSG00000029552
	ENSMUSG00000021486		ENSMUSG00000040026		ENSMUSG00000033685
	ENSMUSG00000031304		ENSMUSG00000054672		ENSMUSG00000032939
	ENSMUSG00000024030		ENSMUSG00000076556		ENSMUSG00000028961
	ENSMUSG00000019558		ENSMUSG00000020017		ENSMUSG00000028719
	ENSMUSG00000046027		ENSMUSG00000076563		ENSMUSG00000026575
	ENSMUSG00000040263		ENSMUSG00000095863		ENSMUSG00000012519
	ENSMUSG00000016664		ENSMUSG00000076594		ENSMUSG00000052056
	ENSMUSG00000021994		ENSMUSG00000034855		ENSMUSG00000000171
	ENSMUSG00000014668		ENSMUSG00000076564		ENSMUSG00000055866
	ENSMUSG00000022960		ENSMUSG00000103271		ENSMUSG00000106864
	ENSMUSG00000022570		ENSMUSG00000095633		ENSMUSG00000058922
	ENSMUSG00000021811		ENSMUSG00000076937		ENSMUSG00000025521
	ENSMUSG00000004264		ENSMUSG00000094509		ENSMUSG00000049327
	ENSMUSG00000028923		ENSMUSG00000095429		ENSMUSG00000057561
	ENSMUSG00000028633		ENSMUSG00000096459		ENSMUSG00000032068
	ENSMUSG00000022724		ENSMUSG00000075014		ENSMUSG00000036002
	ENSMUSG00000002767		ENSMUSG00000076569		ENSMUSG00000038990
	ENSMUSG00000032299		ENSMUSG00000053318		ENSMUSG00000027366
	ENSMUSG00000025192		ENSMUSG00000026415		ENSMUSG00000027360
	ENSMUSG00000041491		ENSMUSG00000048148		ENSMUSG00000014867
	ENSMUSG00000029625		ENSMUSG00000095200		ENSMUSG00000032640
	ENSMUSG00000023048		ENSMUSG00000096594		ENSMUSG00000039529
	ENSMUSG00000034786		ENSMUSG00000037095		ENSMUSG00000023805
	ENSMUSG00000027163		ENSMUSG00000035186		ENSMUSG00000017446
	ENSMUSG00000028699		ENSMUSG00000095497		ENSMUSG00000039911
	ENSMUSG00000020284		ENSMUSG00000076668		ENSMUSG00000025130
	ENSMUSG00000023277		ENSMUSG00000095753		ENSMUSG00000040865
	ENSMUSG00000041506		ENSMUSG00000076670		ENSMUSG00000032383
	ENSMUSG00000059248		ENSMUSG00000076523		ENSMUSG00000017664
	ENSMUSG00000079491		ENSMUSG00000072109		ENSMUSG00000021771
	ENSMUSG00000000594		ENSMUSG00000026285		ENSMUSG00000039976
	ENSMUSG00000037905		ENSMUSG00000041202		ENSMUSG00000034993
	ENSMUSG00000010048		ENSMUSG00000076538		ENSMUSG00000030082
	ENSMUSG00000036860		ENSMUSG00000023992		ENSMUSG00000038280
	ENSMUSG00000038400		ENSMUSG00000095583		ENSMUSG00000028385
	ENSMUSG00000026520		ENSMUSG00000023078		ENSMUSG00000028478
	ENSMUSG00000099980		ENSMUSG00000026417		ENSMUSG00000024601
	ENSMUSG00000031527		ENSMUSG00000102364		ENSMUSG00000026853
	ENSMUSG00000037243		ENSMUSG00000076934		ENSMUSG00000046434
	ENSMUSG00000023019		NewGene.5233		ENSMUSG00000006611
	ENSMUSG00000033222		ENSMUSG00000040842		ENSMUSG00000016319
	ENSMUSG00000045752		ENSMUSG00000063779		ENSMUSG00000035722
	ENSMUSG00000028614		ENSMUSG00000061517		ENSMUSG00000031400
	ENSMUSG00000040990		ENSMUSG00000094951		ENSMUSG00000075284
	ENSMUSG00000045594		ENSMUSG00000070354		ENSMUSG00000032997
	ENSMUSG00000028961		ENSMUSG00000076562		ENSMUSG00000034616
	ENSMUSG00000097971		ENSMUSG00000094174		ENSMUSG00000022765
	ENSMUSG00000035559		ENSMUSG00000025473		ENSMUSG00000030047
	ENSMUSG00000035914		NewGene.5650		ENSMUSG00000053291
	ENSMUSG00000028268		ENSMUSG00000076549		ENSMUSG00000030269
	ENSMUSG00000028884		ENSMUSG00000021281		ENSMUSG00000026657
	ENSMUSG00000036437		ENSMUSG00000065037		ENSMUSG00000027108
	ENSMUSG00000019951		ENSMUSG00000039521		ENSMUSG00000023367
	ENSMUSG00000070034		ENSMUSG00000076577		ENSMUSG00000032418
	ENSMUSG00000026856		ENSMUSG00000076615		ENSMUSG00000020329
	ENSMUSG00000023262		ENSMUSG00000094546		ENSMUSG00000034120
	ENSMUSG00000059883		ENSMUSG00000026822		ENSMUSG00000039477
	ENSMUSG00000022841		ENSMUSG00000031779		ENSMUSG00000005103
	ENSMUSG00000051367		ENSMUSG00000036814		ENSMUSG00000026483
	ENSMUSG00000020440		ENSMUSG00000086706		ENSMUSG00000024817
	NewGene.16995		ENSMUSG00000044708		ENSMUSG00000050912
	ENSMUSG00000107002		ENSMUSG00000021322		ENSMUSG00000031154
	ENSMUSG00000015112		ENSMUSG00000012889		ENSMUSG00000010048
	ENSMUSG00000062647		ENSMUSG00000094694		ENSMUSG00000028670
	ENSMUSG00000022216		ENSMUSG00000068299		ENSMUSG00000055660
	ENSMUSG00000030107		ENSMUSG00000026656		ENSMUSG00000023026
	ENSMUSG00000028159		ENSMUSG00000076749		ENSMUSG00000035181
	ENSMUSG00000028251		ENSMUSG00000076614		ENSMUSG00000035011
	ENSMUSG00000060860		ENSMUSG00000020889		ENSMUSG00000020644
	ENSMUSG00000029720		ENSMUSG00000096764		ENSMUSG00000113637
	ENSMUSG00000038527		ENSMUSG00000095642		ENSMUSG00000044934
	ENSMUSG00000022391		ENSMUSG00000092074		ENSMUSG00000063229
	ENSMUSG00000000384		ENSMUSG00000031506		ENSMUSG00000042660
	ENSMUSG00000026389		ENSMUSG00000032591		ENSMUSG00000020935
	ENSMUSG00000007050		ENSMUSG00000005917		ENSMUSG00000089832
	ENSMUSG00000022503		ENSMUSG00000095630		ENSMUSG00000032754
	ENSMUSG00000033684		ENSMUSG00000031444		ENSMUSG00000036057
	ENSMUSG00000003438		ENSMUSG00000026009		ENSMUSG00000045216
	ENSMUSG00000052117		ENSMUSG00000076583		ENSMUSG00000079941
	ENSMUSG00000019139		ENSMUSG00000096464		ENSMUSG00000020196
	ENSMUSG00000091649		ENSMUSG00000038642		ENSMUSG00000037552
	ENSMUSG00000027962		ENSMUSG00000076680		ENSMUSG00000002250
	ENSMUSG00000035885		ENSMUSG00000071713		ENSMUSG00000095687
	ENSMUSG00000024556		ENSMUSG00000028885		ENSMUSG00000014303
	ENSMUSG00000031093		ENSMUSG00000049723		ENSMUSG00000032477
	ENSMUSG00000026303		ENSMUSG00000023903		ENSMUSG00000031652
	ENSMUSG00000038775		ENSMUSG00000047898		ENSMUSG00000022181
	ENSMUSG00000006392		ENSMUSG00000047370		ENSMUSG00000020152
	ENSMUSG00000023087		ENSMUSG00000015709		ENSMUSG00000034714
	ENSMUSG00000036678		ENSMUSG00000072770		ENSMUSG00000094724
	ENSMUSG00000036986		NewGene.2966		ENSMUSG00000040712
	ENSMUSG00000066724		ENSMUSG00000031709		ENSMUSG00000014444
	ENSMUSG00000004626		ENSMUSG00000098814		ENSMUSG00000005125
	ENSMUSG00000021262		ENSMUSG00000025279		ENSMUSG00000067071
	ENSMUSG00000035104		ENSMUSG00000030854		ENSMUSG00000024942
	ENSMUSG00000025464		ENSMUSG00000076532		ENSMUSG00000026072
	ENSMUSG00000020604		ENSMUSG00000011008		ENSMUSG00000041995
	ENSMUSG00000020810		ENSMUSG00000095571		ENSMUSG00000023186
	ENSMUSG00000037902		ENSMUSG00000031445		ENSMUSG00000028049
	ENSMUSG00000026980		ENSMUSG00000003206		ENSMUSG00000030691
	ENSMUSG00000028793		ENSMUSG00000045322		ENSMUSG00000039483
	ENSMUSG00000020573		ENSMUSG00000031970		ENSMUSG00000029186
	ENSMUSG00000025226		ENSMUSG00000091523		ENSMUSG00000000420
	ENSMUSG00000028973		ENSMUSG00000094420		ENSMUSG00000056724
	ENSMUSG00000057058		ENSMUSG00000071714		ENSMUSG00000035545
	ENSMUSG00000032418		ENSMUSG00000034792		ENSMUSG00000040725
	ENSMUSG00000004642		ENSMUSG00000076501		ENSMUSG00000038831
	ENSMUSG00000101892		ENSMUSG00000056529		ENSMUSG00000026349
	ENSMUSG00000047250		ENSMUSG00000051969		ENSMUSG00000022960
	ENSMUSG00000025134		ENSMUSG00000029925		ENSMUSG00000039168
	ENSMUSG00000039145		ENSMUSG00000001348		ENSMUSG00000022672
	ENSMUSG00000044734		ENSMUSG00000001128		ENSMUSG00000001700
	ENSMUSG00000024579		ENSMUSG00000022504		ENSMUSG00000040322
	ENSMUSG00000007034		ENSMUSG00000024112		ENSMUSG00000056904
	ENSMUSG00000051727		ENSMUSG00000054161		ENSMUSG00000051007
	ENSMUSG00000027330		ENSMUSG00000028435		ENSMUSG00000042570
	ENSMUSG00000020265		ENSMUSG00000029380		ENSMUSG00000040249
	ENSMUSG00000021474		ENSMUSG00000057816		ENSMUSG00000021754
	ENSMUSG00000022479		ENSMUSG00000042372		ENSMUSG00000038838
	ENSMUSG00000070284		ENSMUSG00000020798		ENSMUSG00000020810
	ENSMUSG00000073565		ENSMUSG00000008193		ENSMUSG00000066245
	ENSMUSG00000003746		ENSMUSG00000038112		ENSMUSG00000042826
	ENSMUSG00000097518		ENSMUSG00000005045		ENSMUSG00000040466
	ENSMUSG00000039264		ENSMUSG00000047773		ENSMUSG00000043091
	ENSMUSG00000027360		ENSMUSG00000042817		ENSMUSG00000023953
	ENSMUSG00000060950		ENSMUSG00000097074		ENSMUSG00000039934
	ENSMUSG00000038650		ENSMUSG00000076752		ENSMUSG00000081999
	ENSMUSG00000028333		ENSMUSG00000076695		ENSMUSG00000038014
	ENSMUSG00000004043		ENSMUSG00000000120		ENSMUSG00000022814
	ENSMUSG00000037362		ENSMUSG00000036896		ENSMUSG00000028292
	ENSMUSG00000029449		ENSMUSG00000024672		ENSMUSG00000024858
	ENSMUSG00000032312		ENSMUSG00000024124		ENSMUSG00000022283
	ENSMUSG00000032038		ENSMUSG00000058755		ENSMUSG00000029430
	ENSMUSG00000026864		ENSMUSG00000040899		ENSMUSG00000023104
	ENSMUSG00000060224		ENSMUSG00000097994		ENSMUSG00000033253
	ENSMUSG00000097328		ENSMUSG00000051590		ENSMUSG00000033114
	ENSMUSG00000025521		ENSMUSG00000063130		ENSMUSG00000047250
	ENSMUSG00000040466		ENSMUSG00000050370		ENSMUSG00000033624
	ENSMUSG00000027248		ENSMUSG00000004698		ENSMUSG00000038417
	ENSMUSG00000026728		ENSMUSG00000079492		ENSMUSG00000020654
	ENSMUSG00000023971		ENSMUSG00000025128		ENSMUSG00000028048
	ENSMUSG00000062753		ENSMUSG00000110440		ENSMUSG00000014905
	ENSMUSG00000019539		ENSMUSG00000076586		ENSMUSG00000028699
	ENSMUSG00000039497		ENSMUSG00000042254		ENSMUSG00000032359
	ENSMUSG00000058729		ENSMUSG00000090231		ENSMUSG00000024006
	ENSMUSG00000024833		ENSMUSG00000050377		ENSMUSG00000024856
	ENSMUSG00000089847		ENSMUSG00000051439		ENSMUSG00000034201
	ENSMUSG00000020571		ENSMUSG00000000903		ENSMUSG00000049657
	ENSMUSG00000024539		ENSMUSG00000094433		ENSMUSG00000019302
	ENSMUSG00000016495		ENSMUSG00000030960		ENSMUSG00000024830
	ENSMUSG00000033845		ENSMUSG00000095280		ENSMUSG00000020741
	ENSMUSG00000036478		NewGene.22158		ENSMUSG00000039886
	ENSMUSG00000066632		ENSMUSG00000071005		ENSMUSG00000081684
	ENSMUSG00000029580		ENSMUSG00000031910		ENSMUSG00000074247
	ENSMUSG00000020744		ENSMUSG00000004296		ENSMUSG00000026558
	ENSMUSG00000032915		ENSMUSG00000034342		ENSMUSG00000043067
	ENSMUSG00000032035		NewGene.1576		ENSMUSG00000046808
	ENSMUSG00000021062		ENSMUSG00000114033		ENSMUSG00000031904
	ENSMUSG00000019326		ENSMUSG00000017400		ENSMUSG00000019055
	ENSMUSG00000023272		ENSMUSG00000047797		ENSMUSG00000039456
	ENSMUSG00000022177		ENSMUSG00000043807		ENSMUSG00000074277
	ENSMUSG00000097141		ENSMUSG00000032013		NewGene.12084
	ENSMUSG00000007029		ENSMUSG00000078440		ENSMUSG00000026126
	ENSMUSG00000034744		ENSMUSG00000076541		ENSMUSG00000022498
	ENSMUSG00000028378		ENSMUSG00000035486		ENSMUSG00000035372
	ENSMUSG00000025227		ENSMUSG00000034227		ENSMUSG00000019433
	ENSMUSG00000029136		ENSMUSG00000025903		ENSMUSG00000024952
	ENSMUSG00000032020		ENSMUSG00000024670		ENSMUSG00000032012
	ENSMUSG00000023051		ENSMUSG00000095170		ENSMUSG00000025512
	ENSMUSG00000054408		ENSMUSG00000019850		ENSMUSG00000028560
	ENSMUSG00000032579		ENSMUSG00000031780		ENSMUSG00000022967
	ENSMUSG00000040532		ENSMUSG00000004730		ENSMUSG00000035890
	ENSMUSG00000042747		ENSMUSG00000046456		ENSMUSG00000035891
	ENSMUSG00000035835		ENSMUSG00000020901		NewGene.1961
	ENSMUSG00000067274		ENSMUSG00000076613		ENSMUSG00000021922
	ENSMUSG00000024644		ENSMUSG00000030468		ENSMUSG00000038607
	ENSMUSG00000014599		ENSMUSG00000058818		NewGene.15252
	ENSMUSG00000034663		ENSMUSG00000095029		ENSMUSG00000028957
	ENSMUSG00000063694		ENSMUSG00000015950		ENSMUSG00000004054
	ENSMUSG00000074738		ENSMUSG00000040950		ENSMUSG00000033379
	ENSMUSG00000032014		ENSMUSG00000094322		ENSMUSG00000021957
	ENSMUSG00000029610		ENSMUSG00000032595		ENSMUSG00000044496
	ENSMUSG00000037759		ENSMUSG00000060962		ENSMUSG00000015733
	ENSMUSG00000021559		ENSMUSG00000026166		ENSMUSG00000069565
	ENSMUSG00000002633		ENSMUSG00000021356		ENSMUSG00000024393
	ENSMUSG00000037921		ENSMUSG00000008318		ENSMUSG00000022391
	ENSMUSG00000029430		ENSMUSG00000036905		ENSMUSG00000031309
	ENSMUSG00000036186		ENSMUSG00000037868		ENSMUSG00000028799
	ENSMUSG00000068758		ENSMUSG00000015947		ENSMUSG00000037458
	ENSMUSG00000109511		ENSMUSG00000095210		ENSMUSG00000029098
	ENSMUSG00000082895		ENSMUSG00000044976		ENSMUSG00000031387
	ENSMUSG00000061167		ENSMUSG00000076666		ENSMUSG00000030002
	ENSMUSG00000023004		ENSMUSG00000039084		ENSMUSG00000024613
	ENSMUSG00000036381		ENSMUSG00000052241		ENSMUSG00000032518
	ENSMUSG00000027641		ENSMUSG00000042677		ENSMUSG00000031333
	ENSMUSG00000075010		ENSMUSG00000096715		ENSMUSG00000035473
	ENSMUSG00000056904		ENSMUSG00000068105		ENSMUSG00000056201
	ENSMUSG00000007041		ENSMUSG00000025140		ENSMUSG00000025612
	ENSMUSG00000022221		ENSMUSG00000052160		ENSMUSG00000040312
	ENSMUSG00000025701		ENSMUSG00000021198		ENSMUSG00000021484
	ENSMUSG00000009687		ENSMUSG00000078161		ENSMUSG00000049300
	ENSMUSG00000030125		ENSMUSG00000079620		ENSMUSG00000032120
	ENSMUSG00000041515		ENSMUSG00000024669		ENSMUSG00000043998
	NewGene.14040		ENSMUSG00000010021		ENSMUSG00000022453
	ENSMUSG00000068240		ENSMUSG00000022490		ENSMUSG00000060032
	ENSMUSG00000030979		ENSMUSG00000103254		ENSMUSG00000040263
	ENSMUSG00000002603		ENSMUSG00000025929		ENSMUSG00000013275
	ENSMUSG00000005142		ENSMUSG00000060509		ENSMUSG00000011257
	ENSMUSG00000022657		ENSMUSG00000037548		ENSMUSG00000032604
	ENSMUSG00000031266		ENSMUSG00000015340		ENSMUSG00000074305
	ENSMUSG00000083716		ENSMUSG00000057265		ENSMUSG00000056493
	ENSMUSG00000026749		ENSMUSG00000078942		ENSMUSG00000027263
	ENSMUSG00000003190		ENSMUSG00000060183		ENSMUSG00000017057
	ENSMUSG00000040701		ENSMUSG00000018774		ENSMUSG00000099913
	ENSMUSG00000062038		ENSMUSG00000022667		ENSMUSG00000020328
	ENSMUSG00000027398		ENSMUSG00000006269		ENSMUSG00000045752
	ENSMUSG00000072437		ENSMUSG00000051506		ENSMUSG00000001999
	ENSMUSG00000044583		ENSMUSG00000052837		ENSMUSG00000035351
	ENSMUSG00000030322		ENSMUSG00000108348		ENSMUSG00000038384
	ENSMUSG00000032643		ENSMUSG00000097462		ENSMUSG00000026278
	ENSMUSG00000062382		ENSMUSG00000025461		ENSMUSG00000042492
	ENSMUSG00000026126		ENSMUSG00000079543		ENSMUSG00000042410
	ENSMUSG00000016024		ENSMUSG00000032185		ENSMUSG00000101188
	ENSMUSG00000079523		ENSMUSG00000000794		ENSMUSG00000024985
	ENSMUSG00000053801		ENSMUSG00000036587		ENSMUSG00000022142
	ENSMUSG00000035356		ENSMUSG00000076535		ENSMUSG00000035021
	ENSMUSG00000070699		ENSMUSG00000090164		ENSMUSG00000018559
	ENSMUSG00000036246		ENSMUSG00000032860		ENSMUSG00000002107
	NewGene.9948		ENSMUSG00000097993		ENSMUSG00000056608
	ENSMUSG00000031609		ENSMUSG00000030144		ENSMUSG00000030671
	ENSMUSG00000018920		ENSMUSG00000069305		ENSMUSG00000007670
	ENSMUSG00000037103		ENSMUSG00000035356		ENSMUSG00000039617
	ENSMUSG00000034349		ENSMUSG00000029121		ENSMUSG00000029093
	ENSMUSG00000029695		ENSMUSG00000024810		ENSMUSG00000027248
	ENSMUSG00000051457		ENSMUSG00000027359		ENSMUSG00000021929
	ENSMUSG00000024194		ENSMUSG00000028071		ENSMUSG00000019539
	ENSMUSG00000105383		ENSMUSG00000067714		ENSMUSG00000035632
	ENSMUSG00000033294		ENSMUSG00000032010		ENSMUSG00000028268
	ENSMUSG00000076498		ENSMUSG00000047976		ENSMUSG00000006782
	ENSMUSG00000046223		ENSMUSG00000031596		ENSMUSG00000033294
	ENSMUSG00000028634		ENSMUSG00000024679		ENSMUSG00000027327
	ENSMUSG00000006281		ENSMUSG00000110170		ENSMUSG00000029723
	ENSMUSG00000024677		ENSMUSG00000028362		ENSMUSG00000042644
	ENSMUSG00000001506		ENSMUSG00000031494		ENSMUSG00000024002
	ENSMUSG00000037580		ENSMUSG00000079298		ENSMUSG00000038828
	ENSMUSG00000050737		ENSMUSG00000022659		ENSMUSG00000028634
	ENSMUSG00000020010		ENSMUSG00000021950		ENSMUSG00000034707
	ENSMUSG00000046432		ENSMUSG00000024663		ENSMUSG00000038151
	ENSMUSG00000031897		ENSMUSG00000063600		ENSMUSG00000020571
	ENSMUSG00000041697		ENSMUSG00000043913		ENSMUSG00000041782
	ENSMUSG00000094627		ENSMUSG00000081723		ENSMUSG00000063052
	ENSMUSG00000024516		ENSMUSG00000004902		ENSMUSG00000015247
	ENSMUSG00000028581		ENSMUSG00000029811		ENSMUSG00000029840
	ENSMUSG00000025403		NewGene.2103		ENSMUSG00000020604
	ENSMUSG00000028860		ENSMUSG00000010066		ENSMUSG00000070808
	ENSMUSG00000026117		ENSMUSG00000075015		ENSMUSG00000026158
	ENSMUSG00000024121		ENSMUSG00000028525		ENSMUSG00000002014
	ENSMUSG00000050377		ENSMUSG00000016496		ENSMUSG00000028978
	ENSMUSG00000027160		ENSMUSG00000015134		ENSMUSG00000032312
	ENSMUSG00000049882		ENSMUSG00000075304		ENSMUSG00000062070
	ENSMUSG00000033467		ENSMUSG00000049608		ENSMUSG00000018909
	ENSMUSG00000040061		ENSMUSG00000028111		ENSMUSG00000022724
	ENSMUSG00000034807		ENSMUSG00000044162		ENSMUSG00000049624
	ENSMUSG00000052821		ENSMUSG00000035818		ENSMUSG00000039308
	ENSMUSG00000003873		ENSMUSG00000043243		ENSMUSG00000029547
	ENSMUSG00000069899		ENSMUSG00000078771		ENSMUSG00000009772
	ENSMUSG00000022842		ENSMUSG00000021922		ENSMUSG00000008475
	ENSMUSG00000008036		ENSMUSG00000044156		ENSMUSG00000001175
	ENSMUSG00000016319		ENSMUSG00000025648		ENSMUSG00000070327
	ENSMUSG00000070003		ENSMUSG00000089901		ENSMUSG00000063160
	ENSMUSG00000035439		ENSMUSG00000055301		ENSMUSG00000023066
	ENSMUSG00000005800		ENSMUSG00000043621		ENSMUSG00000106831
	ENSMUSG00000021957		ENSMUSG00000079293		ENSMUSG00000037610
	ENSMUSG00000060802		NewGene.16837		ENSMUSG00000035278
	ENSMUSG00000103865		ENSMUSG00000098008		ENSMUSG00000023277
	ENSMUSG00000002668		ENSMUSG00000071203		ENSMUSG00000014668
	ENSMUSG00000051977		ENSMUSG00000092517		ENSMUSG00000022125
	ENSMUSG00000006731		ENSMUSG00000029919		ENSMUSG00000006476
	ENSMUSG00000022436		ENSMUSG00000025257		ENSMUSG00000004815
	ENSMUSG00000069682		ENSMUSG00000018008		ENSMUSG00000019838
	ENSMUSG00000109244		ENSMUSG00000040093		ENSMUSG00000040721
	ENSMUSG00000046718		ENSMUSG00000073421		ENSMUSG00000031934
	ENSMUSG00000032085		ENSMUSG00000067149		ENSMUSG00000031007
	ENSMUSG00000050552		ENSMUSG00000024397		ENSMUSG00000050931
	ENSMUSG00000055553		ENSMUSG00000003418		ENSMUSG00000042167
	ENSMUSG00000085611		ENSMUSG00000030592		ENSMUSG00000025823
	ENSMUSG00000049404		ENSMUSG00000012428		ENSMUSG00000033004
	ENSMUSG00000063229		ENSMUSG00000047228		ENSMUSG00000064289
	ENSMUSG00000001999		ENSMUSG00000076731		ENSMUSG00000047181
	ENSMUSG00000028654		ENSMUSG00000028581		ENSMUSG00000038759
	ENSMUSG00000034795		ENSMUSG00000026475		ENSMUSG00000096210
	ENSMUSG00000039787		ENSMUSG00000068606		ENSMUSG00000024773
	NewGene.12709		ENSMUSG00000037440		ENSMUSG00000050390
	ENSMUSG00000053291		ENSMUSG00000099021		ENSMUSG00000035064
	ENSMUSG00000033826		ENSMUSG00000074151		ENSMUSG00000022974
	ENSMUSG00000099794		ENSMUSG00000021136		ENSMUSG00000055760
	ENSMUSG00000039316		ENSMUSG00000022901		ENSMUSG00000042724
	ENSMUSG00000029482		ENSMUSG00000064267		ENSMUSG00000047123
	ENSMUSG00000024937		NewGene.15252		ENSMUSG00000037300
	ENSMUSG00000078439		ENSMUSG00000042345		ENSMUSG00000030123
	ENSMUSG00000048087		ENSMUSG00000038797		ENSMUSG00000057541
	ENSMUSG00000004952		ENSMUSG00000086228		ENSMUSG00000039361
	ENSMUSG00000081723		ENSMUSG00000021277		ENSMUSG00000067629
	ENSMUSG00000020077		ENSMUSG00000078588		ENSMUSG00000025226
	ENSMUSG00000029821		ENSMUSG00000095366		ENSMUSG00000002083
	ENSMUSG00000002257		ENSMUSG00000048897		ENSMUSG00000000134
	ENSMUSG00000028007		ENSMUSG00000105646		ENSMUSG00000022503
	ENSMUSG00000054200		ENSMUSG00000070691		ENSMUSG00000001419
	ENSMUSG00000038793		ENSMUSG00000030789		ENSMUSG00000070034
	ENSMUSG00000033192		ENSMUSG00000070644		ENSMUSG00000061414
	ENSMUSG00000037447		ENSMUSG00000036887		ENSMUSG00000011752
	ENSMUSG00000094420		ENSMUSG00000078552		ENSMUSG00000068196
	ENSMUSG00000001707		ENSMUSG00000029720		ENSMUSG00000062203
	ENSMUSG00000086925		ENSMUSG00000026358		ENSMUSG00000026307
	ENSMUSG00000003617		ENSMUSG00000042129		ENSMUSG00000025733
	ENSMUSG00000022673		ENSMUSG00000022262		ENSMUSG00000000384
	ENSMUSG00000038259		ENSMUSG00000039956		ENSMUSG00000037646
	ENSMUSG00000002983		ENSMUSG00000037902		ENSMUSG00000032842
	ENSMUSG00000033307		ENSMUSG00000030413		ENSMUSG00000035958
	ENSMUSG00000023349		ENSMUSG00000059824		ENSMUSG00000020280
	ENSMUSG00000050555		ENSMUSG00000079445		ENSMUSG00000024972
	ENSMUSG00000058099		ENSMUSG00000076540		ENSMUSG00000039834
	ENSMUSG00000002228		ENSMUSG00000047810		ENSMUSG00000049401
	ENSMUSG00000027490		ENSMUSG00000052212		ENSMUSG00000037470
	ENSMUSG00000030826		ENSMUSG00000040751		ENSMUSG00000022947
	ENSMUSG00000060032		ENSMUSG00000020279		NewGene.25381
	ENSMUSG00000044092		ENSMUSG00000019122		ENSMUSG00000070780
	ENSMUSG00000076928		ENSMUSG00000028801		ENSMUSG00000073418
	ENSMUSG00000030924		ENSMUSG00000029005		ENSMUSG00000066632
	ENSMUSG00000090925		ENSMUSG00000049625		ENSMUSG00000021327
	ENSMUSG00000048677		ENSMUSG00000025017		ENSMUSG00000073678
	ENSMUSG00000055760		ENSMUSG00000061947		ENSMUSG00000096472
	ENSMUSG00000020307		ENSMUSG00000046637		ENSMUSG00000007038
	ENSMUSG00000081049		ENSMUSG00000057068		ENSMUSG00000042688
	ENSMUSG00000030560		ENSMUSG00000050232		ENSMUSG00000025409
	ENSMUSG00000004317		ENSMUSG00000015476		ENSMUSG00000020440
	ENSMUSG00000073792		ENSMUSG00000078945		ENSMUSG00000026600
	ENSMUSG00000046865		ENSMUSG00000027322		ENSMUSG00000018931
	ENSMUSG00000091955		ENSMUSG00000021898		ENSMUSG00000029475
	ENSMUSG00000056201		ENSMUSG00000002602		ENSMUSG00000027646
	ENSMUSG00000092203		ENSMUSG00000047462		ENSMUSG00000060950
	ENSMUSG00000044229		ENSMUSG00000036196		ENSMUSG00000035885
	ENSMUSG00000020089		ENSMUSG00000081665		ENSMUSG00000050708
	ENSMUSG00000040693		ENSMUSG00000022096		ENSMUSG00000022571
	ENSMUSG00000025163		ENSMUSG00000080746		ENSMUSG00000003051
	ENSMUSG00000023345		ENSMUSG00000097804		ENSMUSG00000038866
	ENSMUSG00000032518		ENSMUSG00000055254		ENSMUSG00000027206
	ENSMUSG00000040899		ENSMUSG00000030214		ENSMUSG00000034908
	ENSMUSG00000028693		ENSMUSG00000051498		ENSMUSG00000023764
	ENSMUSG00000107928		NewGene.22910		ENSMUSG00000072889
	ENSMUSG00000053158		ENSMUSG00000095788		ENSMUSG00000023051
	ENSMUSG00000016496		ENSMUSG00000022543		ENSMUSG00000009090
	ENSMUSG00000050921		ENSMUSG00000040552		ENSMUSG00000035279
	ENSMUSG00000078695		ENSMUSG00000040350		ENSMUSG00000017132
	ENSMUSG00000038644		ENSMUSG00000038179		ENSMUSG00000044147
	ENSMUSG00000044702		ENSMUSG00000049823		ENSMUSG00000075705
	ENSMUSG00000059195		ENSMUSG00000078921		ENSMUSG00000049643
	ENSMUSG00000075511		ENSMUSG00000039783		ENSMUSG00000044768
	ENSMUSG00000034330		ENSMUSG00000100916		ENSMUSG00000035310
	ENSMUSG00000017929		ENSMUSG00000062082		ENSMUSG00000017713
	ENSMUSG00000025912		ENSMUSG00000048731		ENSMUSG00000031146
	NewGene.2564		ENSMUSG00000091712		ENSMUSG00000066361
	ENSMUSG00000043091		ENSMUSG00000022790		ENSMUSG00000054387
	ENSMUSG00000020328		ENSMUSG00000060586		ENSMUSG00000021559
	ENSMUSG00000024972		ENSMUSG00000034652		ENSMUSG00000003812
	ENSMUSG00000026012		ENSMUSG00000040522		ENSMUSG00000026068
	ENSMUSG00000060216		ENSMUSG00000079227		ENSMUSG00000018585
	ENSMUSG00000054428		ENSMUSG00000005947		ENSMUSG00000028572
	ENSMUSG00000019982		ENSMUSG00000096108		ENSMUSG00000029104
	ENSMUSG00000017652		ENSMUSG00000052724		ENSMUSG00000087370
	ENSMUSG00000081999		ENSMUSG00000039145		ENSMUSG00000032908
	ENSMUSG00000045455		ENSMUSG00000029771		ENSMUSG00000020089
	ENSMUSG00000056220		ENSMUSG00000043017		ENSMUSG00000026821
	ENSMUSG00000037922		ENSMUSG00000032561		ENSMUSG00000030403
	ENSMUSG00000038521		ENSMUSG00000040003		ENSMUSG00000031337
	ENSMUSG00000050708		ENSMUSG00000030043		ENSMUSG00000028555
	ENSMUSG00000062421		ENSMUSG00000058022		ENSMUSG00000039195
	NewGene.11625		ENSMUSG00000107035		ENSMUSG00000041143
	NewGene.11626		ENSMUSG00000042514		ENSMUSG00000061518
	ENSMUSG00000032091		ENSMUSG00000043122		ENSMUSG00000020235
	ENSMUSG00000018507		ENSMUSG00000060924		ENSMUSG00000030660
	ENSMUSG00000032902		ENSMUSG00000058163		ENSMUSG00000031807
	ENSMUSG00000037126		ENSMUSG00000028874		ENSMUSG00000038047
	ENSMUSG00000022978		ENSMUSG00000053153		ENSMUSG00000031928
	ENSMUSG00000060538		ENSMUSG00000020120		ENSMUSG00000041763
	ENSMUSG00000028937		ENSMUSG00000067768		ENSMUSG00000039218
	ENSMUSG00000079941		ENSMUSG00000096638		ENSMUSG00000019982
	ENSMUSG00000046971		ENSMUSG00000024901		ENSMUSG00000022763
	ENSMUSG00000062075		ENSMUSG00000013974		ENSMUSG00000038068
	ENSMUSG00000006442		ENSMUSG00000029530		ENSMUSG00000026602
	ENSMUSG00000028064		ENSMUSG00000032011		ENSMUSG00000063439
	ENSMUSG00000025188		ENSMUSG00000014453		ENSMUSG00000027678
	ENSMUSG00000075705		ENSMUSG00000022178		ENSMUSG00000047604
	ENSMUSG00000081669		ENSMUSG00000019027		ENSMUSG00000059049
	ENSMUSG00000022571		ENSMUSG00000055994		ENSMUSG00000028007
	ENSMUSG00000047281		NewGene.8997		ENSMUSG00000024235
	ENSMUSG00000035208		ENSMUSG00000029273		ENSMUSG00000033083
	ENSMUSG00000038910		ENSMUSG00000107872		ENSMUSG00000020238
	ENSMUSG00000078941		ENSMUSG00000033213		ENSMUSG00000098188
	ENSMUSG00000021175		ENSMUSG00000060188		ENSMUSG00000024143
	ENSMUSG00000027506		ENSMUSG00000022636		ENSMUSG00000004626
	ENSMUSG00000046841		ENSMUSG00000038147		ENSMUSG00000033684
	ENSMUSG00000024352		ENSMUSG00000018927		ENSMUSG00000047676
	NewGene.21830		ENSMUSG00000047793		ENSMUSG00000022657
	ENSMUSG00000021268		ENSMUSG00000042678		ENSMUSG00000038451
	ENSMUSG00000018168		ENSMUSG00000021457		ENSMUSG00000039246
	ENSMUSG00000067818		ENSMUSG00000006800		ENSMUSG00000019066
	ENSMUSG00000070436		ENSMUSG00000028186		ENSMUSG00000046718
	ENSMUSG00000051506		ENSMUSG00000095379		ENSMUSG00000039470
	NewGene.3393		ENSMUSG00000011305		ENSMUSG00000096687
	ENSMUSG00000030225		ENSMUSG00000075302		ENSMUSG00000025366
	ENSMUSG00000094335		ENSMUSG00000071552		ENSMUSG00000004642
	NewGene.25788		ENSMUSG00000047671		ENSMUSG00000019139
	NewGene.25787		ENSMUSG00000015966		ENSMUSG00000044447
	ENSMUSG00000000409		ENSMUSG00000036322		ENSMUSG00000052310
	ENSMUSG00000018861		ENSMUSG00000059326		ENSMUSG00000056268
	ENSMUSG00000079685		ENSMUSG00000005547		ENSMUSG00000085787
	ENSMUSG00000014243		ENSMUSG00000085565		ENSMUSG00000020178
	ENSMUSG00000024892		ENSMUSG00000104422		ENSMUSG00000036208
	ENSMUSG00000022797		ENSMUSG00000018486		ENSMUSG00000059939
	ENSMUSG00000025779		ENSMUSG00000039391		ENSMUSG00000032370
	ENSMUSG00000024480		ENSMUSG00000074342		ENSMUSG00000039804
	ENSMUSG00000059743		ENSMUSG00000098132		ENSMUSG00000035735
	ENSMUSG00000030761		ENSMUSG00000030124		ENSMUSG00000075012
	ENSMUSG00000027938		ENSMUSG00000024401		ENSMUSG00000030826
	ENSMUSG00000048277		ENSMUSG00000026866		ENSMUSG00000031016
	ENSMUSG00000067106		ENSMUSG00000047642		ENSMUSG00000034227
	ENSMUSG00000006463		ENSMUSG00000050022		ENSMUSG00000044098
	ENSMUSG00000046879		ENSMUSG00000020941		ENSMUSG00000049502
	ENSMUSG00000096617		ENSMUSG00000020143		ENSMUSG00000025821
	ENSMUSG00000064147		ENSMUSG00000032281		ENSMUSG00000009563
	ENSMUSG00000049109		ENSMUSG00000026548		ENSMUSG00000020679
	ENSMUSG00000041654		ENSMUSG00000022439		ENSMUSG00000024644
	ENSMUSG00000076441		ENSMUSG00000029275		ENSMUSG00000028962
	ENSMUSG00000033589		ENSMUSG00000044052		ENSMUSG00000020227
	ENSMUSG00000028341		ENSMUSG00000037716		ENSMUSG00000048538
	ENSMUSG00000032350		ENSMUSG00000030519		ENSMUSG00000022371
	ENSMUSG00000095794		ENSMUSG00000038756		ENSMUSG00000031133
	ENSMUSG00000030978		ENSMUSG00000044827		ENSMUSG00000022106
	ENSMUSG00000027575		ENSMUSG00000023274		ENSMUSG00000024818
	ENSMUSG00000033488		ENSMUSG00000043461		ENSMUSG00000030218
	ENSMUSG00000000486		ENSMUSG00000092329		ENSMUSG00000036136
	ENSMUSG00000096422		ENSMUSG00000005373		ENSMUSG00000025969
	ENSMUSG00000031903		ENSMUSG00000087340		ENSMUSG00000066724
	ENSMUSG00000055413		ENSMUSG00000066366		ENSMUSG00000040264
	ENSMUSG00000027239		ENSMUSG00000026649		ENSMUSG00000082762
	ENSMUSG00000032093		ENSMUSG00000035860		ENSMUSG00000000149
	ENSMUSG00000025888		ENSMUSG00000058159		ENSMUSG00000033545
	ENSMUSG00000026525		ENSMUSG00000074591		ENSMUSG00000015243
	ENSMUSG00000028128		ENSMUSG00000056215		ENSMUSG00000027901
	ENSMUSG00000002033		ENSMUSG00000029026		ENSMUSG00000028973
	ENSMUSG00000029413		ENSMUSG00000037579		ENSMUSG00000026213
	ENSMUSG00000023169		ENSMUSG00000040010		ENSMUSG00000042351
	ENSMUSG00000029436		ENSMUSG00000096844		ENSMUSG00000024539
	ENSMUSG00000032577		ENSMUSG00000059854		ENSMUSG00000050315
	ENSMUSG00000094446		ENSMUSG00000096940		ENSMUSG00000035024
	ENSMUSG00000034906		ENSMUSG00000045411		ENSMUSG00000022807
	ENSMUSG00000092572		ENSMUSG00000008496		ENSMUSG00000017639
	ENSMUSG00000049744		ENSMUSG00000050600		ENSMUSG00000028403
	ENSMUSG00000031971		ENSMUSG00000026831		ENSMUSG00000051817
	ENSMUSG00000040616		ENSMUSG00000074580		ENSMUSG00000043300
	ENSMUSG00000013155		ENSMUSG00000031654		ENSMUSG00000020899
	ENSMUSG00000070394		ENSMUSG00000028613		ENSMUSG00000034216
	ENSMUSG00000031381		ENSMUSG00000026824		ENSMUSG00000062588
	ENSMUSG00000026708		ENSMUSG00000037143		ENSMUSG00000026708
	ENSMUSG00000029163		ENSMUSG00000033849		ENSMUSG00000043099
	NewGene.10941		ENSMUSG00000042202		ENSMUSG00000070436
	ENSMUSG00000076490		ENSMUSG00000043740		ENSMUSG00000070031
	ENSMUSG00000039206		ENSMUSG00000096971		ENSMUSG00000016495
	ENSMUSG00000021361		ENSMUSG00000056752		ENSMUSG00000042292
	ENSMUSG00000025351		ENSMUSG00000091405		ENSMUSG00000029703
	ENSMUSG00000024737		ENSMUSG00000110706		ENSMUSG00000068394
	ENSMUSG00000032782		ENSMUSG00000102942		ENSMUSG00000058454
	ENSMUSG00000020241		ENSMUSG00000075420		ENSMUSG00000026180
	ENSMUSG00000071068		ENSMUSG00000018599		ENSMUSG00000032038
	ENSMUSG00000087006		ENSMUSG00000035509		ENSMUSG00000036698
	ENSMUSG00000044811		ENSMUSG00000045467		ENSMUSG00000029375
	ENSMUSG00000029363		ENSMUSG00000048776		ENSMUSG00000033016
	ENSMUSG00000079003		ENSMUSG00000002699		ENSMUSG00000030536
	ENSMUSG00000105061		ENSMUSG00000020340		ENSMUSG00000037103
	ENSMUSG00000069939		NewGene.6798		ENSMUSG00000041313
	ENSMUSG00000048234		ENSMUSG00000095771		ENSMUSG00000000958
	ENSMUSG00000017830		ENSMUSG00000010175		ENSMUSG00000039234
	ENSMUSG00000037686		ENSMUSG00000025161		ENSMUSG00000030830
	ENSMUSG00000045411		ENSMUSG00000099655		ENSMUSG00000035692
	ENSMUSG00000029490		ENSMUSG00000022759		ENSMUSG00000034957
	ENSMUSG00000056648		ENSMUSG00000047407		ENSMUSG00000020773
	ENSMUSG00000034708		ENSMUSG00000042349		ENSMUSG00000063972
	ENSMUSG00000017760		ENSMUSG00000052142		ENSMUSG00000066878
	ENSMUSG00000059995		ENSMUSG00000038418		ENSMUSG00000021326
	ENSMUSG00000053080		ENSMUSG00000039629		ENSMUSG00000036534
	ENSMUSG00000036469		ENSMUSG00000054150		ENSMUSG00000051735
	ENSMUSG00000054400		ENSMUSG00000004609		ENSMUSG00000033257
	ENSMUSG00000030283		ENSMUSG00000084803		ENSMUSG00000037344
	ENSMUSG00000061518		NewGene.12339		ENSMUSG00000025511
	ENSMUSG00000041319		ENSMUSG00000050075		ENSMUSG00000029470
	NewGene.7251		ENSMUSG00000097324		ENSMUSG00000026288
	ENSMUSG00000048163		NewGene.12190		ENSMUSG00000035505
	ENSMUSG00000032344		ENSMUSG00000027073		ENSMUSG00000031792
	ENSMUSG00000032381		ENSMUSG00000030577		ENSMUSG00000020272
	ENSMUSG00000046413		ENSMUSG00000050967		ENSMUSG00000080078
	ENSMUSG00000027635		ENSMUSG00000042734		ENSMUSG00000037845
	ENSMUSG00000026784		ENSMUSG00000106106		ENSMUSG00000034390
	ENSMUSG00000006360		ENSMUSG00000050138		ENSMUSG00000006273
	ENSMUSG00000022150		ENSMUSG00000056458		ENSMUSG00000038527
	ENSMUSG00000042759		ENSMUSG00000097620		ENSMUSG00000023272
	ENSMUSG00000036560		ENSMUSG00000035202		ENSMUSG00000039285
	ENSMUSG00000034656		ENSMUSG00000027544		ENSMUSG00000041362
	ENSMUSG00000013974		ENSMUSG00000047880		ENSMUSG00000021218
	ENSMUSG00000044894		NewGene.15714		ENSMUSG00000064325
	ENSMUSG00000083773		ENSMUSG00000042351		ENSMUSG00000025178
	ENSMUSG00000036833		ENSMUSG00000020265		ENSMUSG00000030811
	ENSMUSG00000022111		ENSMUSG00000039372		ENSMUSG00000028453
	ENSMUSG00000040724		ENSMUSG00000039285		ENSMUSG00000068329
	ENSMUSG00000044712		ENSMUSG00000035578		ENSMUSG00000000486
	ENSMUSG00000098178		ENSMUSG00000035165		ENSMUSG00000030452
	ENSMUSG00000038797		ENSMUSG00000048779		ENSMUSG00000026864
	ENSMUSG00000041046		ENSMUSG00000000552		ENSMUSG00000022203
	ENSMUSG00000040247		ENSMUSG00000032511		ENSMUSG00000046794
	ENSMUSG00000026042		ENSMUSG00000024033		ENSMUSG00000023990
	ENSMUSG00000020534		ENSMUSG00000032691		ENSMUSG00000031684
	ENSMUSG00000043931		ENSMUSG00000039238		ENSMUSG00000010021
	ENSMUSG00000007833		ENSMUSG00000035528		ENSMUSG00000030655
	ENSMUSG00000009654		ENSMUSG00000005705		ENSMUSG00000038453
	ENSMUSG00000018362		ENSMUSG00000095616		ENSMUSG00000021493
	ENSMUSG00000024087		ENSMUSG00000024696		ENSMUSG00000083567
	ENSMUSG00000028468		ENSMUSG00000002565		ENSMUSG00000074637
	ENSMUSG00000106574		ENSMUSG00000027514		ENSMUSG00000014599
	ENSMUSG00000040328		ENSMUSG00000108841		ENSMUSG00000034205
	ENSMUSG00000015335		ENSMUSG00000110424		ENSMUSG00000036672
	ENSMUSG00000021451		ENSMUSG00000027068		ENSMUSG00000024851
	ENSMUSG00000004791		NewGene.10544		ENSMUSG00000022111
	ENSMUSG00000035673		ENSMUSG00000036526		ENSMUSG00000033307
	ENSMUSG00000010830		ENSMUSG00000101337		ENSMUSG00000012114
	ENSMUSG00000036353		ENSMUSG00000090173		NewGene.26295
	ENSMUSG00000110949		NewGene.11613		ENSMUSG00000029798
	ENSMUSG00000003418		NewGene.9948		ENSMUSG00000051790
	ENSMUSG00000001588		ENSMUSG00000041552		ENSMUSG00000050555
	ENSMUSG00000051498		ENSMUSG00000020686		ENSMUSG00000022390
	ENSMUSG00000050493		ENSMUSG00000037801		ENSMUSG00000003348
	ENSMUSG00000026650		ENSMUSG00000045502		ENSMUSG00000058239
	ENSMUSG00000022947		ENSMUSG00000026770		ENSMUSG00000050640
	ENSMUSG00000025915		ENSMUSG00000048833		ENSMUSG00000016024
	ENSMUSG00000069083		ENSMUSG00000003363		ENSMUSG00000057762
	ENSMUSG00000021880		ENSMUSG00000006731		ENSMUSG00000020534
	ENSMUSG00000062939		ENSMUSG00000031803		ENSMUSG00000001281
	ENSMUSG00000052087		ENSMUSG00000046982		NewGene.25342
	ENSMUSG00000058794		ENSMUSG00000021998		ENSMUSG00000020661
	ENSMUSG00000024330		ENSMUSG00000053063		ENSMUSG00000027204
	ENSMUSG00000033880		ENSMUSG00000037337		ENSMUSG00000060244
	ENSMUSG00000034959		ENSMUSG00000061723		NewGene.10401
	ENSMUSG00000037638		ENSMUSG00000002847		ENSMUSG00000071178
	ENSMUSG00000014453		ENSMUSG00000074622		ENSMUSG00000046410
	ENSMUSG00000090602		ENSMUSG00000058099		ENSMUSG00000029625
	ENSMUSG00000080242		ENSMUSG00000027368		ENSMUSG00000031851
	ENSMUSG00000081665		ENSMUSG00000085887		ENSMUSG00000002985
	ENSMUSG00000026928		ENSMUSG00000005087		ENSMUSG00000023036
	ENSMUSG00000026080		ENSMUSG00000005824		ENSMUSG00000029322
	ENSMUSG00000029559		ENSMUSG00000015355		ENSMUSG00000037306
	ENSMUSG00000050232		ENSMUSG00000045312		ENSMUSG00000096617
	ENSMUSG00000073555		ENSMUSG00000071347		ENSMUSG00000021725
	ENSMUSG00000047676		ENSMUSG00000071478		ENSMUSG00000032280
	ENSMUSG00000053687		ENSMUSG00000032816		ENSMUSG00000034353
	ENSMUSG00000023367		ENSMUSG00000019929		ENSMUSG00000063364
	ENSMUSG00000050856		ENSMUSG00000076655		ENSMUSG00000028860
	ENSMUSG00000031906		ENSMUSG00000036634		ENSMUSG00000024883
	ENSMUSG00000040212		ENSMUSG00000039720		ENSMUSG00000020290
	ENSMUSG00000055069		ENSMUSG00000110266		ENSMUSG00000027831
	ENSMUSG00000094006		ENSMUSG00000095105		ENSMUSG00000029415
	ENSMUSG00000026395		ENSMUSG00000022488		ENSMUSG00000020744
	ENSMUSG00000028599		ENSMUSG00000032589		ENSMUSG00000031885
	ENSMUSG00000005465		ENSMUSG00000064125		ENSMUSG00000062939
	ENSMUSG00000002458		ENSMUSG00000025154		ENSMUSG00000026447
	ENSMUSG00000032661		ENSMUSG00000112148		ENSMUSG00000078636
	ENSMUSG00000025648		ENSMUSG00000021423		ENSMUSG00000022711
	ENSMUSG00000018500		ENSMUSG00000048794		ENSMUSG00000027070
	ENSMUSG00000026786		ENSMUSG00000042788		ENSMUSG00000025464
	ENSMUSG00000047798		ENSMUSG00000094940		ENSMUSG00000025407
	ENSMUSG00000040563		ENSMUSG00000074071		ENSMUSG00000064127
	ENSMUSG00000004266		ENSMUSG00000078451		ENSMUSG00000032561
	ENSMUSG00000090544		ENSMUSG00000079484		ENSMUSG00000042202
	ENSMUSG00000063696		ENSMUSG00000079845		ENSMUSG00000037759
	ENSMUSG00000040364		ENSMUSG00000066108		ENSMUSG00000031848
	ENSMUSG00000091957		ENSMUSG00000032688		ENSMUSG00000036526
	ENSMUSG00000045733		ENSMUSG00000040229		ENSMUSG00000028693
	ENSMUSG00000020857		ENSMUSG00000094006		ENSMUSG00000026939
	ENSMUSG00000020072		ENSMUSG00000022218		ENSMUSG00000086564
	ENSMUSG00000061882		ENSMUSG00000076480		ENSMUSG00000003814
	ENSMUSG00000030187		ENSMUSG00000032053		ENSMUSG00000028042
	ENSMUSG00000027203		ENSMUSG00000030223		ENSMUSG00000022561
	ENSMUSG00000001444		NewGene.18776		ENSMUSG00000007817
	ENSMUSG00000025422		ENSMUSG00000023019		ENSMUSG00000034595
	ENSMUSG00000028480		ENSMUSG00000020312		ENSMUSG00000102117
	ENSMUSG00000021115		ENSMUSG00000038037		ENSMUSG00000022558
	NewGene.7757		ENSMUSG00000022032		ENSMUSG00000041926
	ENSMUSG00000080875		ENSMUSG00000051314		ENSMUSG00000004677
	ENSMUSG00000042345		ENSMUSG00000070942		ENSMUSG00000032265
	ENSMUSG00000027359		ENSMUSG00000000386		ENSMUSG00000048707
	ENSMUSG00000022408		ENSMUSG00000041515		ENSMUSG00000053205
	ENSMUSG00000074637		ENSMUSG00000099974		ENSMUSG00000039678
	ENSMUSG00000021281		ENSMUSG00000032093		ENSMUSG00000007034
	ENSMUSG00000030649		ENSMUSG00000096410		ENSMUSG00000040195
	NewGene.1174		ENSMUSG00000047454		ENSMUSG00000025950
	NewGene.6018		ENSMUSG00000051367		ENSMUSG00000023259
	ENSMUSG00000018740		ENSMUSG00000006529		ENSMUSG00000013155
	ENSMUSG00000027018		ENSMUSG00000034579		ENSMUSG00000037362
	NewGene.19529		ENSMUSG00000103804		ENSMUSG00000020474
	ENSMUSG00000036411		ENSMUSG00000004933		ENSMUSG00000028923
	ENSMUSG00000047497		NewGene.22878		ENSMUSG00000002668
	ENSMUSG00000021591		ENSMUSG00000025902		ENSMUSG00000035095
	ENSMUSG00000021624		ENSMUSG00000018168		ENSMUSG00000024807
	ENSMUSG00000028334		ENSMUSG00000108126		ENSMUSG00000056116
	ENSMUSG00000005364		ENSMUSG00000049130		ENSMUSG00000063275
	ENSMUSG00000032311		ENSMUSG00000032186		ENSMUSG00000025403
	ENSMUSG00000036931		ENSMUSG00000076578		ENSMUSG00000112825
	ENSMUSG00000039062		ENSMUSG00000047604		ENSMUSG00000019989
	ENSMUSG00000026596		ENSMUSG00000026466		ENSMUSG00000024892
	ENSMUSG00000025395		ENSMUSG00000074398		NewGene.10359
	ENSMUSG00000022574		ENSMUSG00000030651		ENSMUSG00000059851
	ENSMUSG00000045917		ENSMUSG00000042423		ENSMUSG00000001910
	ENSMUSG00000100839		ENSMUSG00000103928		ENSMUSG00000094627
	ENSMUSG00000044703		NewGene.22781		ENSMUSG00000024833
	ENSMUSG00000076036		ENSMUSG00000038522		ENSMUSG00000094796
	ENSMUSG00000047880		ENSMUSG00000026271		ENSMUSG00000054693
	NewGene.10359		ENSMUSG00000056569		ENSMUSG00000060639
	ENSMUSG00000070427		ENSMUSG00000096499		ENSMUSG00000110644
	ENSMUSG00000022500		ENSMUSG00000037685		ENSMUSG00000022978
	ENSMUSG00000030336		ENSMUSG00000011034		ENSMUSG00000000278
	ENSMUSG00000059060		ENSMUSG00000045980		ENSMUSG00000042978
	ENSMUSG00000038295		ENSMUSG00000024575		ENSMUSG00000032637
	ENSMUSG00000024338		ENSMUSG00000111547		ENSMUSG00000033287
	ENSMUSG00000096464		ENSMUSG00000037613		ENSMUSG00000032363
	ENSMUSG00000057262		ENSMUSG00000040613		ENSMUSG00000099998
	ENSMUSG00000111875		ENSMUSG00000110696		ENSMUSG00000029661
	ENSMUSG00000068105		ENSMUSG00000024399		ENSMUSG00000059456
	ENSMUSG00000028339		ENSMUSG00000071550		ENSMUSG00000025887
	ENSMUSG00000102037		ENSMUSG00000061397		ENSMUSG00000024736
	ENSMUSG00000068246		ENSMUSG00000038011		ENSMUSG00000052248
	ENSMUSG00000031155		ENSMUSG00000087458		ENSMUSG00000024338
	ENSMUSG00000078920		ENSMUSG00000035539		ENSMUSG00000038181
	ENSMUSG00000063975		ENSMUSG00000030074		NewGene.7932
	ENSMUSG00000039476		ENSMUSG00000079502		ENSMUSG00000047180
	ENSMUSG00000053475		ENSMUSG00000026700		ENSMUSG00000092203
	ENSMUSG00000026107		ENSMUSG00000076465		ENSMUSG00000002633
	ENSMUSG00000018585		ENSMUSG00000042289		ENSMUSG00000087141
	ENSMUSG00000027076		ENSMUSG00000052861		ENSMUSG00000006442
	ENSMUSG00000007815		ENSMUSG00000003863		ENSMUSG00000026728
	ENSMUSG00000024084		ENSMUSG00000037509		ENSMUSG00000019194
	ENSMUSG00000003420		ENSMUSG00000026622		ENSMUSG00000063696
	ENSMUSG00000085939		ENSMUSG00000002111		ENSMUSG00000073910
	ENSMUSG00000052776		ENSMUSG00000022768		ENSMUSG00000032788
	ENSMUSG00000039981		ENSMUSG00000073492		ENSMUSG00000032560
	ENSMUSG00000053746		ENSMUSG00000028599		ENSMUSG00000003166
	ENSMUSG00000006715		NewGene.16306		ENSMUSG00000000440
	ENSMUSG00000031848		ENSMUSG00000041193		ENSMUSG00000032656
	ENSMUSG00000052760		ENSMUSG00000050122		ENSMUSG00000052336
	ENSMUSG00000040564		ENSMUSG00000033966		ENSMUSG00000091780
	ENSMUSG00000030742		ENSMUSG00000015396		ENSMUSG00000027775
	ENSMUSG00000036639		ENSMUSG00000049404		ENSMUSG00000035293
	ENSMUSG00000029204		ENSMUSG00000076576		ENSMUSG00000031833
	ENSMUSG00000028865		ENSMUSG00000024087		ENSMUSG00000039637
	ENSMUSG00000021125		ENSMUSG00000110481		ENSMUSG00000090958
	ENSMUSG00000019845		ENSMUSG00000031662		ENSMUSG00000029086
	ENSMUSG00000029660		ENSMUSG00000054659		ENSMUSG00000095079
	ENSMUSG00000043613		NewGene.24660		ENSMUSG00000056153
	ENSMUSG00000030592		ENSMUSG00000021303		ENSMUSG00000020733
	ENSMUSG00000100774		ENSMUSG00000052133		ENSMUSG00000066442
	ENSMUSG00000076437		ENSMUSG00000043157		ENSMUSG00000083902
	ENSMUSG00000081684		ENSMUSG00000032826		NewGene.22933
	ENSMUSG00000039682		ENSMUSG00000096515		ENSMUSG00000067017
	NewGene.4478		ENSMUSG00000001773		ENSMUSG00000035783
	ENSMUSG00000029401		ENSMUSG00000021913		ENSMUSG00000112597
	ENSMUSG00000014547		ENSMUSG00000049134		ENSMUSG00000014602
	ENSMUSG00000079455		ENSMUSG00000050157		ENSMUSG00000025377
	ENSMUSG00000034459		ENSMUSG00000016255		ENSMUSG00000054400
	ENSMUSG00000006344		ENSMUSG00000040978		ENSMUSG00000040867
	ENSMUSG00000021773		ENSMUSG00000016283		ENSMUSG00000027254
	ENSMUSG00000064193		ENSMUSG00000022757		ENSMUSG00000010936
	ENSMUSG00000015745		ENSMUSG00000085720		ENSMUSG00000032000
	ENSMUSG00000030798		ENSMUSG00000046623		ENSMUSG00000081603
	ENSMUSG00000030144		ENSMUSG00000087111		ENSMUSG00000041642
	ENSMUSG00000070605		ENSMUSG00000021553		ENSMUSG00000011263
	ENSMUSG00000033701		ENSMUSG00000078490		ENSMUSG00000022965
	ENSMUSG00000026950		ENSMUSG00000084902		ENSMUSG00000030257
	ENSMUSG00000038034		ENSMUSG00000024353		ENSMUSG00000000282
	ENSMUSG00000038550		ENSMUSG00000039099		ENSMUSG00000078453
	ENSMUSG00000021298		ENSMUSG00000097466		ENSMUSG00000001248
	ENSMUSG00000020737		ENSMUSG00000020581		ENSMUSG00000020312
	ENSMUSG00000081087		ENSMUSG00000036805		ENSMUSG00000039158
	ENSMUSG00000029322		ENSMUSG00000095204		ENSMUSG00000063895
	ENSMUSG00000076470		ENSMUSG00000044811		ENSMUSG00000027889
	ENSMUSG00000041889		ENSMUSG00000056498		ENSMUSG00000085213
	ENSMUSG00000006589		ENSMUSG00000029553		ENSMUSG00000063975
	ENSMUSG00000032575		ENSMUSG00000006218		ENSMUSG00000001056
	ENSMUSG00000025289		ENSMUSG00000081044		ENSMUSG00000101892
	ENSMUSG00000025348		ENSMUSG00000038180		ENSMUSG00000053317
	ENSMUSG00000076508		ENSMUSG00000053783		ENSMUSG00000036565
	ENSMUSG00000096727		ENSMUSG00000032023		ENSMUSG00000055333
	ENSMUSG00000095419		ENSMUSG00000031822		ENSMUSG00000024079
	ENSMUSG00000041406		ENSMUSG00000046711		ENSMUSG00000041718
	ENSMUSG00000090031		ENSMUSG00000021298		ENSMUSG00000000088
	ENSMUSG00000090272		ENSMUSG00000040061		ENSMUSG00000034041
	ENSMUSG00000015766		ENSMUSG00000043020		ENSMUSG00000017652
	ENSMUSG00000000869		ENSMUSG00000031448		ENSMUSG00000039623
	ENSMUSG00000060550		ENSMUSG00000029086		ENSMUSG00000042328
	ENSMUSG00000068227		ENSMUSG00000112014		ENSMUSG00000019326
	ENSMUSG00000000204		ENSMUSG00000067616		ENSMUSG00000026095
	ENSMUSG00000054520		ENSMUSG00000078157		ENSMUSG00000031609
	ENSMUSG00000034641		ENSMUSG00000110791		ENSMUSG00000041538
	ENSMUSG00000060703		ENSMUSG00000053175		ENSMUSG00000001542
	ENSMUSG00000073405		ENSMUSG00000033777		ENSMUSG00000037326
	ENSMUSG00000057244		ENSMUSG00000030638		ENSMUSG00000029063
	ENSMUSG00000003206		ENSMUSG00000044453		ENSMUSG00000041258
	ENSMUSG00000074151		ENSMUSG00000033731		ENSMUSG00000049866
	ENSMUSG00000027107		ENSMUSG00000054128		ENSMUSG00000101335
	ENSMUSG00000070390		ENSMUSG00000103593		ENSMUSG00000036304
	ENSMUSG00000064109		ENSMUSG00000055978		ENSMUSG00000053007
	ENSMUSG00000026833		ENSMUSG00000058975		ENSMUSG00000030329
	ENSMUSG00000026536		ENSMUSG00000102140		ENSMUSG00000021182
	ENSMUSG00000029687		ENSMUSG00000049734		ENSMUSG00000059883
	ENSMUSG00000029730		ENSMUSG00000054545		ENSMUSG00000012350
	ENSMUSG00000031165		ENSMUSG00000048402		ENSMUSG00000026856
	ENSMUSG00000033970		ENSMUSG00000059498		ENSMUSG00000026874
	ENSMUSG00000025225		ENSMUSG00000017607		ENSMUSG00000021453
	ENSMUSG00000081434		NewGene.1162		ENSMUSG00000042286
	ENSMUSG00000004552		ENSMUSG00000044583		ENSMUSG00000075511
	ENSMUSG00000008193		ENSMUSG00000030257		ENSMUSG00000007029
	ENSMUSG00000020143		ENSMUSG00000048865		ENSMUSG00000039231
	ENSMUSG00000032011		ENSMUSG00000005237		ENSMUSG00000029478
	ENSMUSG00000097906		ENSMUSG00000061577		ENSMUSG00000022382
	ENSMUSG00000022364		ENSMUSG00000028957		ENSMUSG00000032381
	ENSMUSG00000105504		ENSMUSG00000040276		ENSMUSG00000022148
	ENSMUSG00000082044		ENSMUSG00000054385		ENSMUSG00000030678
	ENSMUSG00000092116		ENSMUSG00000020542		ENSMUSG00000028341
	ENSMUSG00000022094		ENSMUSG00000026580		ENSMUSG00000028413
	ENSMUSG00000028037		ENSMUSG00000015568		ENSMUSG00000038400
	ENSMUSG00000030214		ENSMUSG00000028360		ENSMUSG00000097221
	ENSMUSG00000024399		ENSMUSG00000026657		ENSMUSG00000041420
	ENSMUSG00000021932		ENSMUSG00000062859		ENSMUSG00000035284
	ENSMUSG00000020974		ENSMUSG00000028459		ENSMUSG00000024579
	ENSMUSG00000056888		ENSMUSG00000002033		ENSMUSG00000032555
	ENSMUSG00000085156		ENSMUSG00000070803		ENSMUSG00000079499
	ENSMUSG00000096930		ENSMUSG00000028337		ENSMUSG00000022098
	ENSMUSG00000021948		ENSMUSG00000039096		ENSMUSG00000048895
	ENSMUSG00000035337		ENSMUSG00000103865		ENSMUSG00000015437
	ENSMUSG00000024013		ENSMUSG00000040283		ENSMUSG00000110686
	ENSMUSG00000029587		ENSMUSG00000017390		ENSMUSG00000060538
	ENSMUSG00000037966		ENSMUSG00000000290		ENSMUSG00000022456
	ENSMUSG00000021278		ENSMUSG00000035711		ENSMUSG00000024742
	ENSMUSG00000027016		ENSMUSG00000047419		ENSMUSG00000024789
	ENSMUSG00000029217		ENSMUSG00000056130		ENSMUSG00000024121
	ENSMUSG00000029581		ENSMUSG00000010307		ENSMUSG00000025351
	ENSMUSG00000027347		ENSMUSG00000097328		ENSMUSG00000019893
	ENSMUSG00000038301		ENSMUSG00000076534		ENSMUSG00000020857
	ENSMUSG00000053317		ENSMUSG00000061132		ENSMUSG00000097908
	ENSMUSG00000099875		ENSMUSG00000089722		ENSMUSG00000000244
	ENSMUSG00000025854		ENSMUSG00000094695		ENSMUSG00000040945
	ENSMUSG00000083677		ENSMUSG00000082433		ENSMUSG00000044548
	ENSMUSG00000031807		ENSMUSG00000074637		ENSMUSG00000026872
	ENSMUSG00000003051		ENSMUSG00000064246		ENSMUSG00000030872
	ENSMUSG00000024640		ENSMUSG00000071398		ENSMUSG00000073411
	ENSMUSG00000042289		ENSMUSG00000031880		ENSMUSG00000021474
	NewGene.12084		ENSMUSG00000041258		ENSMUSG00000015316
	ENSMUSG00000006517		ENSMUSG00000030263		ENSMUSG00000087440
	ENSMUSG00000027533		ENSMUSG00000099398		ENSMUSG00000070003
	ENSMUSG00000047797		ENSMUSG00000037845		ENSMUSG00000031628
	ENSMUSG00000074280		ENSMUSG00000028031		ENSMUSG00000048612
	ENSMUSG00000113987		ENSMUSG00000067341		ENSMUSG00000048578
	ENSMUSG00000107906		ENSMUSG00000053113		ENSMUSG00000048965
	ENSMUSG00000032053		ENSMUSG00000040528		ENSMUSG00000022512
	ENSMUSG00000005413		ENSMUSG00000043099		ENSMUSG00000066595
	ENSMUSG00000063245		ENSMUSG00000022615		ENSMUSG00000045251
	ENSMUSG00000001056		ENSMUSG00000021624		ENSMUSG00000060962
	ENSMUSG00000059040		ENSMUSG00000018919		ENSMUSG00000052688
	ENSMUSG00000027863		ENSMUSG00000066196		ENSMUSG00000091021
	ENSMUSG00000076754		ENSMUSG00000031831		ENSMUSG00000045594
	ENSMUSG00000021922		ENSMUSG00000044726		ENSMUSG00000037966
	ENSMUSG00000003882		ENSMUSG00000089753		ENSMUSG00000040033
	ENSMUSG00000047443		ENSMUSG00000003279		ENSMUSG00000031145
	ENSMUSG00000024675		ENSMUSG00000100280		ENSMUSG00000075010
	NewGene.10265		ENSMUSG00000037860		ENSMUSG00000036894
	ENSMUSG00000037860		ENSMUSG00000056648		ENSMUSG00000097140
	ENSMUSG00000040629		ENSMUSG00000045903		ENSMUSG00000105383
	ENSMUSG00000042202		ENSMUSG00000030103		ENSMUSG00000021109
	ENSMUSG00000045362		ENSMUSG00000040812		ENSMUSG00000026890
	ENSMUSG00000040152		ENSMUSG00000028782		ENSMUSG00000031441
	ENSMUSG00000093482		ENSMUSG00000028238		ENSMUSG00000029119
	ENSMUSG00000028744		ENSMUSG00000033852		ENSMUSG00000091058
	ENSMUSG00000026981		ENSMUSG00000030657		ENSMUSG00000024743
	ENSMUSG00000027368		ENSMUSG00000041351		ENSMUSG00000027018
	ENSMUSG00000050014		ENSMUSG00000045763		ENSMUSG00000045374
	ENSMUSG00000082762		ENSMUSG00000040165		ENSMUSG00000050737
	ENSMUSG00000094356		ENSMUSG00000042707		ENSMUSG00000031595
	ENSMUSG00000021998		ENSMUSG00000030148		ENSMUSG00000068758
	ENSMUSG00000093789		ENSMUSG00000022305		ENSMUSG00000025466
	ENSMUSG00000027843		ENSMUSG00000021451		ENSMUSG00000005718
	ENSMUSG00000024673		ENSMUSG00000028294		ENSMUSG00000022757
	ENSMUSG00000028885		ENSMUSG00000020838		ENSMUSG00000073016
	ENSMUSG00000031389		ENSMUSG00000026489		ENSMUSG00000036381
	ENSMUSG00000032688		ENSMUSG00000033717		ENSMUSG00000028382
	ENSMUSG00000096336		ENSMUSG00000026922		ENSMUSG00000027962
	ENSMUSG00000026321		ENSMUSG00000020334		ENSMUSG00000029992
	ENSMUSG00000029102		NewGene.21034		ENSMUSG00000111394
	ENSMUSG00000033066		ENSMUSG00000074802		ENSMUSG00000044350
	ENSMUSG00000056749		NewGene.27118		ENSMUSG00000024764
	ENSMUSG00000041920		ENSMUSG00000076550		ENSMUSG00000097906
	ENSMUSG00000009731		ENSMUSG00000030256		ENSMUSG00000061589
	ENSMUSG00000102123		ENSMUSG00000055882		ENSMUSG00000028917
	ENSMUSG00000027072		ENSMUSG00000089818		ENSMUSG00000101337
	ENSMUSG00000010307		ENSMUSG00000102418		ENSMUSG00000004099
	ENSMUSG00000058523		ENSMUSG00000029304		ENSMUSG00000063316
	ENSMUSG00000108437		ENSMUSG00000026065		ENSMUSG00000029291
	NewGene.19750		ENSMUSG00000052302		ENSMUSG00000036834
	ENSMUSG00000027342		ENSMUSG00000107478		ENSMUSG00000039542
	ENSMUSG00000113569		ENSMUSG00000027347		ENSMUSG00000018861
	ENSMUSG00000047230		ENSMUSG00000049571		ENSMUSG00000078853
	ENSMUSG00000024340		ENSMUSG00000060639		ENSMUSG00000035929
	ENSMUSG00000044469		ENSMUSG00000096918		ENSMUSG00000036678
	ENSMUSG00000028464		ENSMUSG00000041954		ENSMUSG00000037486
	ENSMUSG00000022372		ENSMUSG00000067577		ENSMUSG00000035206
	ENSMUSG00000110457		ENSMUSG00000097059		ENSMUSG00000036995
	ENSMUSG00000092486		ENSMUSG00000060212		ENSMUSG00000061533
	ENSMUSG00000024209		ENSMUSG00000052013		ENSMUSG00000020256
	ENSMUSG00000029560		ENSMUSG00000051998		ENSMUSG00000096971
	ENSMUSG00000109061		ENSMUSG00000059089		ENSMUSG00000041319
	ENSMUSG00000039899		ENSMUSG00000022595		ENSMUSG00000044026
	ENSMUSG00000028544		ENSMUSG00000000861		ENSMUSG00000027330
	ENSMUSG00000015027		ENSMUSG00000027843		ENSMUSG00000033857
	ENSMUSG00000070713		ENSMUSG00000028064		ENSMUSG00000060703
	ENSMUSG00000090553		ENSMUSG00000040345		ENSMUSG00000073982
	ENSMUSG00000042306		ENSMUSG00000022126		NewGene.18849
	ENSMUSG00000006310		NewGene.5390		ENSMUSG00000020869
	ENSMUSG00000071303		ENSMUSG00000029778		ENSMUSG00000030742
	ENSMUSG00000042817		ENSMUSG00000023947		ENSMUSG00000033697
	ENSMUSG00000020018		ENSMUSG00000027485		ENSMUSG00000024835
	NewGene.13779		ENSMUSG00000038843		ENSMUSG00000037679
	ENSMUSG00000039774		ENSMUSG00000031264		NewGene.15285
	ENSMUSG00000004707		ENSMUSG00000071656		NewGene.2269
	ENSMUSG00000029771		ENSMUSG00000049588		ENSMUSG00000028468
	ENSMUSG00000046688		ENSMUSG00000024014		ENSMUSG00000062190
	ENSMUSG00000017550		ENSMUSG00000010142		NewGene.8682
	ENSMUSG00000000120		ENSMUSG00000040247		ENSMUSG00000029283
	ENSMUSG00000089682		ENSMUSG00000051279		ENSMUSG00000091639
	ENSMUSG00000026958		ENSMUSG00000022489		ENSMUSG00000034708
	ENSMUSG00000067916		ENSMUSG00000022783		ENSMUSG00000026317
	ENSMUSG00000034854		ENSMUSG00000027630		ENSMUSG00000030600
	ENSMUSG00000021457		ENSMUSG00000039543		ENSMUSG00000054200
	ENSMUSG00000025808		ENSMUSG00000097296		ENSMUSG00000021361
	ENSMUSG00000004446		ENSMUSG00000037370		ENSMUSG00000035842
	ENSMUSG00000004902		ENSMUSG00000029816		ENSMUSG00000054676
	ENSMUSG00000029521		ENSMUSG00000071715		ENSMUSG00000039264
	ENSMUSG00000030074		ENSMUSG00000036875		ENSMUSG00000024516
	ENSMUSG00000064065		ENSMUSG00000037101		ENSMUSG00000053128
	ENSMUSG00000015340		ENSMUSG00000038677		ENSMUSG00000039813
	ENSMUSG00000041707		ENSMUSG00000031893		ENSMUSG00000079298
	ENSMUSG00000102117		ENSMUSG00000037995		ENSMUSG00000041132
	ENSMUSG00000041881		ENSMUSG00000049811		NewGene.11625
	ENSMUSG00000079845		ENSMUSG00000014158		NewGene.11626
	ENSMUSG00000027423		ENSMUSG00000101615		ENSMUSG00000026303
	ENSMUSG00000085890		ENSMUSG00000041920		ENSMUSG00000040990
	ENSMUSG00000029373		ENSMUSG00000038259		ENSMUSG00000061175
	ENSMUSG00000010142		ENSMUSG00000022657		ENSMUSG00000082016
	NewGene.1610		ENSMUSG00000070000		ENSMUSG00000052957
	ENSMUSG00000085048		ENSMUSG00000039208		ENSMUSG00000025701
	ENSMUSG00000111083		ENSMUSG00000046585		ENSMUSG00000063600
	ENSMUSG00000038276		ENSMUSG00000024349		ENSMUSG00000047759
	ENSMUSG00000023393		ENSMUSG00000107225		ENSMUSG00000042606
	ENSMUSG00000025161		ENSMUSG00000039193		ENSMUSG00000045455
	ENSMUSG00000057409		ENSMUSG00000074796		ENSMUSG00000080746
	ENSMUSG00000026095		ENSMUSG00000031165		ENSMUSG00000002033
	ENSMUSG00000037572		ENSMUSG00000023949		ENSMUSG00000017830
	ENSMUSG00000091523		ENSMUSG00000035295		NewGene.11924
	ENSMUSG00000041347		ENSMUSG00000038370		ENSMUSG00000074342
	NewGene.22518		ENSMUSG00000086514		ENSMUSG00000034902
	NewGene.14678		ENSMUSG00000072600		ENSMUSG00000022673
	ENSMUSG00000055612		ENSMUSG00000037731		ENSMUSG00000022574
	ENSMUSG00000040345		ENSMUSG00000005718		ENSMUSG00000024897
	ENSMUSG00000080746		ENSMUSG00000039936		ENSMUSG00000029192
	ENSMUSG00000060131		ENSMUSG00000081058		ENSMUSG00000045411
	ENSMUSG00000043991		ENSMUSG00000034744		ENSMUSG00000036478
	ENSMUSG00000055415		ENSMUSG00000111740		ENSMUSG00000024529
	ENSMUSG00000021795		ENSMUSG00000095700		ENSMUSG00000056220
	ENSMUSG00000046006		ENSMUSG00000039126		ENSMUSG00000108352
	ENSMUSG00000017832		ENSMUSG00000034116		ENSMUSG00000013701
	ENSMUSG00000025058		ENSMUSG00000032484		ENSMUSG00000029695
	ENSMUSG00000035004		ENSMUSG00000049307		ENSMUSG00000060568
	ENSMUSG00000025232		NewGene.17595		ENSMUSG00000091957
	NewGene.20104		ENSMUSG00000034463		NewGene.18848
	ENSMUSG00000052724		ENSMUSG00000035004		ENSMUSG00000024675
	ENSMUSG00000034116		ENSMUSG00000102037		ENSMUSG00000048087
	ENSMUSG00000056612		ENSMUSG00000049988		ENSMUSG00000098905
	ENSMUSG00000037370		ENSMUSG00000022094		ENSMUSG00000051391
	ENSMUSG00000057729		ENSMUSG00000045761		ENSMUSG00000056124
	ENSMUSG00000039936		ENSMUSG00000086596		NewGene.115
	ENSMUSG00000103451		ENSMUSG00000069072		ENSMUSG00000039997
	ENSMUSG00000025068		ENSMUSG00000037795		ENSMUSG00000040212
	ENSMUSG00000075520		ENSMUSG00000039218		ENSMUSG00000004552
	ENSMUSG00000000861		ENSMUSG00000046688		ENSMUSG00000015112
	ENSMUSG00000060377		ENSMUSG00000000318		ENSMUSG00000031304
	ENSMUSG00000076577		ENSMUSG00000037640		ENSMUSG00000070372
	ENSMUSG00000021720		ENSMUSG00000063529		ENSMUSG00000052593
	ENSMUSG00000020650		ENSMUSG00000024013		ENSMUSG00000072572
	ENSMUSG00000003363		ENSMUSG00000000544		ENSMUSG00000056498
	ENSMUSG00000061947		ENSMUSG00000057191		ENSMUSG00000074991
	ENSMUSG00000097742		ENSMUSG00000107412		ENSMUSG00000111875
	ENSMUSG00000101958		ENSMUSG00000036962		ENSMUSG00000030539
	ENSMUSG00000000088		ENSMUSG00000078776		ENSMUSG00000042766
	ENSMUSG00000071203		ENSMUSG00000031608		ENSMUSG00000037905
	ENSMUSG00000060586		ENSMUSG00000021363		ENSMUSG00000002771
	ENSMUSG00000036022		ENSMUSG00000001763		ENSMUSG00000032870
	ENSMUSG00000004698		ENSMUSG00000068748		ENSMUSG00000017007
	ENSMUSG00000033316		ENSMUSG00000047021		ENSMUSG00000039682
	ENSMUSG00000047822		ENSMUSG00000032436		ENSMUSG00000019726
	ENSMUSG00000027115		ENSMUSG00000021886		ENSMUSG00000110545
	ENSMUSG00000041954		ENSMUSG00000041809		ENSMUSG00000032578
	ENSMUSG00000006014		ENSMUSG00000064057		ENSMUSG00000002897
	ENSMUSG00000026344		ENSMUSG00000026426		ENSMUSG00000024298
	ENSMUSG00000042462		ENSMUSG00000034361		ENSMUSG00000107872
	ENSMUSG00000031805		ENSMUSG00000038987		ENSMUSG00000036918
	ENSMUSG00000030844		ENSMUSG00000037610		ENSMUSG00000038331
	ENSMUSG00000103473		ENSMUSG00000066129		ENSMUSG00000014498
	ENSMUSG00000030525		ENSMUSG00000035273		ENSMUSG00000006589
	ENSMUSG00000026193		ENSMUSG00000078429		ENSMUSG00000030122
	ENSMUSG00000024525		ENSMUSG00000058921		ENSMUSG00000031155
	NewGene.7667		ENSMUSG00000025949		ENSMUSG00000023868
	ENSMUSG00000076752		ENSMUSG00000015316		ENSMUSG00000026764
	ENSMUSG00000044349		ENSMUSG00000108350		ENSMUSG00000064043
	ENSMUSG00000035711		ENSMUSG00000022949		ENSMUSG00000079442
	ENSMUSG00000021707		ENSMUSG00000056413		ENSMUSG00000030720
	ENSMUSG00000097993		ENSMUSG00000028730		ENSMUSG00000020400
	ENSMUSG00000041827		NewGene.7297		ENSMUSG00000033701
	ENSMUSG00000060063		ENSMUSG00000000682		ENSMUSG00000030149
	ENSMUSG00000111254		NewGene.1783		ENSMUSG00000105681
	ENSMUSG00000051278		ENSMUSG00000026712		ENSMUSG00000021756
	ENSMUSG00000024402		ENSMUSG00000036594		ENSMUSG00000002602
	ENSMUSG00000049775		ENSMUSG00000035246		ENSMUSG00000028334
	ENSMUSG00000096833		ENSMUSG00000020097		ENSMUSG00000101236
	ENSMUSG00000036634		ENSMUSG00000003233		ENSMUSG00000020340
	ENSMUSG00000098112		ENSMUSG00000024300		ENSMUSG00000025289
	ENSMUSG00000044306		ENSMUSG00000030474		ENSMUSG00000036186
	ENSMUSG00000038388		NewGene.28604		ENSMUSG00000095123
	ENSMUSG00000083945		ENSMUSG00000020573		ENSMUSG00000067608
	ENSMUSG00000031430		ENSMUSG00000049295		ENSMUSG00000074796
	ENSMUSG00000083834		ENSMUSG00000051212		ENSMUSG00000031278
	ENSMUSG00000026622		ENSMUSG00000014602		ENSMUSG00000048251
	ENSMUSG00000027994		ENSMUSG00000055415		ENSMUSG00000061833
	ENSMUSG00000035528		ENSMUSG00000070877		ENSMUSG00000021115
	ENSMUSG00000067608		ENSMUSG00000031548		ENSMUSG00000033970
	ENSMUSG00000031101		ENSMUSG00000030747		ENSMUSG00000016477
	ENSMUSG00000031548		ENSMUSG00000050105		ENSMUSG00000039395
	ENSMUSG00000044827		ENSMUSG00000071324		NewGene.7757
	ENSMUSG00000089753		ENSMUSG00000071392		ENSMUSG00000032109
	ENSMUSG00000025511		ENSMUSG00000016028		ENSMUSG00000100839
	ENSMUSG00000062210		ENSMUSG00000015314		ENSMUSG00000037580
	ENSMUSG00000027510		ENSMUSG00000056888		ENSMUSG00000104222
	NewGene.15980		ENSMUSG00000034245		ENSMUSG00000053101
	ENSMUSG00000030220		ENSMUSG00000024737		ENSMUSG00000036022
	ENSMUSG00000030147		ENSMUSG00000032322		ENSMUSG00000024793
	ENSMUSG00000043157		NewGene.10432		ENSMUSG00000018171
	ENSMUSG00000030707		ENSMUSG00000005667		ENSMUSG00000044303
	ENSMUSG00000042677		ENSMUSG00000040489		ENSMUSG00000022221
	ENSMUSG00000005338		ENSMUSG00000029516		ENSMUSG00000057262
	ENSMUSG00000024670		ENSMUSG00000033417		ENSMUSG00000092116
	ENSMUSG00000021176		ENSMUSG00000046805		ENSMUSG00000026979
	ENSMUSG00000078630		ENSMUSG00000036362		ENSMUSG00000069083
	NewGene.27798		ENSMUSG00000030830		ENSMUSG00000029545
	ENSMUSG00000050721		ENSMUSG00000035032		ENSMUSG00000026389
	ENSMUSG00000005540		ENSMUSG00000068551		ENSMUSG00000031808
	ENSMUSG00000029298		ENSMUSG00000037683		ENSMUSG00000028664
	ENSMUSG00000084350		ENSMUSG00000007613		ENSMUSG00000070427
	ENSMUSG00000040722		ENSMUSG00000101556		ENSMUSG00000026648
	ENSMUSG00000063672		ENSMUSG00000009687		ENSMUSG00000042759
	ENSMUSG00000059493		ENSMUSG00000046207		NewGene.28586
	ENSMUSG00000098055		ENSMUSG00000037157		ENSMUSG00000071068
	ENSMUSG00000022360		ENSMUSG00000028001		ENSMUSG00000050565
	ENSMUSG00000027811		ENSMUSG00000019832		ENSMUSG00000011267
	ENSMUSG00000029245		ENSMUSG00000103726		ENSMUSG00000035311
	ENSMUSG00000063524		NewGene.12236		ENSMUSG00000031398
	ENSMUSG00000004473		ENSMUSG00000025422		ENSMUSG00000024673
	ENSMUSG00000046031		ENSMUSG00000000359		ENSMUSG00000048478
	ENSMUSG00000032281		ENSMUSG00000048078		ENSMUSG00000034613
	ENSMUSG00000004609		ENSMUSG00000027555		ENSMUSG00000060802
	ENSMUSG00000035105		ENSMUSG00000022621		ENSMUSG00000028041
	ENSMUSG00000076540		ENSMUSG00000050896		ENSMUSG00000036622
	ENSMUSG00000087340		ENSMUSG00000074121		ENSMUSG00000087691
	NewGene.16306		ENSMUSG00000021880		ENSMUSG00000080223
	ENSMUSG00000029189		ENSMUSG00000054342		ENSMUSG00000065987
	ENSMUSG00000076522		ENSMUSG00000032122		ENSMUSG00000002983
	ENSMUSG00000068893		ENSMUSG00000037907		ENSMUSG00000046841
	ENSMUSG00000053508		ENSMUSG00000064307		ENSMUSG00000099794
	ENSMUSG00000068696		ENSMUSG00000025804		ENSMUSG00000018986
	ENSMUSG00000021587		ENSMUSG00000032350		ENSMUSG00000037443
	ENSMUSG00000040659		ENSMUSG00000110126		ENSMUSG00000036943
	ENSMUSG00000075266		NewGene.8683		ENSMUSG00000023087
	ENSMUSG00000022378		ENSMUSG00000023349		ENSMUSG00000021287
	ENSMUSG00000087264		ENSMUSG00000036437		ENSMUSG00000025171
	ENSMUSG00000012396		ENSMUSG00000030956		ENSMUSG00000054385
	ENSMUSG00000028681		ENSMUSG00000024610		ENSMUSG00000041449
	ENSMUSG00000028843		ENSMUSG00000049037		ENSMUSG00000023919
	ENSMUSG00000083911		ENSMUSG00000040329		NewGene.14678
	ENSMUSG00000073492		ENSMUSG00000058715		ENSMUSG00000035305
	ENSMUSG00000086124		ENSMUSG00000020377		ENSMUSG00000000957
	ENSMUSG00000028655		ENSMUSG00000031101		ENSMUSG00000074220
	ENSMUSG00000048148		ENSMUSG00000039153		ENSMUSG00000036606
	ENSMUSG00000033752		ENSMUSG00000087644		ENSMUSG00000001444
	ENSMUSG00000001750		ENSMUSG00000038352		ENSMUSG00000028028
	ENSMUSG00000074417		ENSMUSG00000037649		ENSMUSG00000027203
	ENSMUSG00000072621		ENSMUSG00000002668		ENSMUSG00000019737
	ENSMUSG00000029516		ENSMUSG00000099564		ENSMUSG00000038128
	ENSMUSG00000103367		ENSMUSG00000032514		ENSMUSG00000019088
	ENSMUSG00000103255		ENSMUSG00000026610		ENSMUSG00000034917
	ENSMUSG00000039146		ENSMUSG00000018581		ENSMUSG00000001119
	ENSMUSG00000097519		ENSMUSG00000018654		ENSMUSG00000018341
	ENSMUSG00000113128		ENSMUSG00000041995		ENSMUSG00000035960
	ENSMUSG00000036908		ENSMUSG00000072754		ENSMUSG00000025949
	ENSMUSG00000019989		ENSMUSG00000033192		ENSMUSG00000043419
	ENSMUSG00000020120		ENSMUSG00000049580		ENSMUSG00000039191
	ENSMUSG00000047415		ENSMUSG00000072596		ENSMUSG00000039977
	ENSMUSG00000106391		ENSMUSG00000040711		ENSMUSG00000010830
	ENSMUSG00000000308		ENSMUSG00000040659		NewGene.8098
	ENSMUSG00000001095		ENSMUSG00000023169		ENSMUSG00000051977
	ENSMUSG00000027996		ENSMUSG00000063430		ENSMUSG00000027490
	ENSMUSG00000008496		ENSMUSG00000040828		ENSMUSG00000025324
	ENSMUSG00000023919		ENSMUSG00000034353		ENSMUSG00000028132
	ENSMUSG00000055782		ENSMUSG00000031906		ENSMUSG00000018500
	ENSMUSG00000043155		ENSMUSG00000048281		ENSMUSG00000044288
	ENSMUSG00000013367		ENSMUSG00000036246		ENSMUSG00000033508
	ENSMUSG00000076562		ENSMUSG00000020437		ENSMUSG00000046027
	ENSMUSG00000076523		ENSMUSG00000068617		ENSMUSG00000048897
	ENSMUSG00000036596		ENSMUSG00000029650		ENSMUSG00000106870
	ENSMUSG00000061974		ENSMUSG00000023036		ENSMUSG00000037447
	ENSMUSG00000105769		ENSMUSG00000038034		ENSMUSG00000090673
	ENSMUSG00000021665		ENSMUSG00000025329		ENSMUSG00000044783
	NewGene.15950		ENSMUSG00000048142		ENSMUSG00000030225
	ENSMUSG00000101211		ENSMUSG00000036960		ENSMUSG00000106574
	ENSMUSG00000037731		ENSMUSG00000015653		ENSMUSG00000028251
	ENSMUSG00000032690		ENSMUSG00000017002		ENSMUSG00000030530
	ENSMUSG00000076709		ENSMUSG00000038060		ENSMUSG00000035439
	ENSMUSG00000029816		ENSMUSG00000005057		ENSMUSG00000033488
	NewGene.16969		ENSMUSG00000099250		ENSMUSG00000042404
	ENSMUSG00000058402		ENSMUSG00000055884		ENSMUSG00000024334
	ENSMUSG00000081593		ENSMUSG00000047798		ENSMUSG00000040612
	ENSMUSG00000039431		ENSMUSG00000021751		ENSMUSG00000036504
	ENSMUSG00000028896		ENSMUSG00000032258		ENSMUSG00000030978
	ENSMUSG00000059824		ENSMUSG00000042453		ENSMUSG00000087484
	ENSMUSG00000095029		ENSMUSG00000028195		ENSMUSG00000027506
	NewGene.12791		ENSMUSG00000031022		ENSMUSG00000049562
	ENSMUSG00000024300		NewGene.1993		ENSMUSG00000032740
	ENSMUSG00000108129		ENSMUSG00000034330		ENSMUSG00000032643
	ENSMUSG00000111340		ENSMUSG00000021720		ENSMUSG00000032091
	ENSMUSG00000030154		ENSMUSG00000026980		ENSMUSG00000042082
	ENSMUSG00000070691		ENSMUSG00000039942		ENSMUSG00000041889
	ENSMUSG00000042349		ENSMUSG00000032014		ENSMUSG00000040093
	ENSMUSG00000079563		ENSMUSG00000031389		ENSMUSG00000056536
	ENSMUSG00000045545		NewGene.7528		ENSMUSG00000024165
	ENSMUSG00000107388		ENSMUSG00000019982		ENSMUSG00000034807
	ENSMUSG00000029616		ENSMUSG00000050295		ENSMUSG00000004791
	ENSMUSG00000023473		ENSMUSG00000073633		ENSMUSG00000020553
	ENSMUSG00000052160		ENSMUSG00000042793		ENSMUSG00000032575
	ENSMUSG00000030579		ENSMUSG00000045232		ENSMUSG00000083773
	ENSMUSG00000078249		ENSMUSG00000061410		ENSMUSG00000041268
	ENSMUSG00000097474		ENSMUSG00000098112		ENSMUSG00000031659
	ENSMUSG00000053522		ENSMUSG00000034394		ENSMUSG00000026107
	ENSMUSG00000025534		ENSMUSG00000040747		ENSMUSG00000064193
	ENSMUSG00000036875		ENSMUSG00000016024		ENSMUSG00000025188
	ENSMUSG00000029602		ENSMUSG00000022861		ENSMUSG00000081434
	ENSMUSG00000051639		ENSMUSG00000043164		ENSMUSG00000031706
	ENSMUSG00000082308		ENSMUSG00000053560		ENSMUSG00000027342
	ENSMUSG00000085400		ENSMUSG00000057895		ENSMUSG00000025461
	ENSMUSG00000037108		ENSMUSG00000097944		ENSMUSG00000099021
	ENSMUSG00000050503		ENSMUSG00000010136		ENSMUSG00000067235
	ENSMUSG00000076617		ENSMUSG00000039981		ENSMUSG00000024480
	ENSMUSG00000101848		ENSMUSG00000024175		ENSMUSG00000037341
	ENSMUSG00000035783		ENSMUSG00000027867		ENSMUSG00000003379
	ENSMUSG00000051076		ENSMUSG00000044772		ENSMUSG00000081126
	ENSMUSG00000097746		ENSMUSG00000034035		ENSMUSG00000080875
	ENSMUSG00000027219		ENSMUSG00000025429		ENSMUSG00000007646
	ENSMUSG00000015709		ENSMUSG00000035984		ENSMUSG00000037921
	ENSMUSG00000075122		ENSMUSG00000062661		ENSMUSG00000092486
	NewGene.11613		ENSMUSG00000060131		ENSMUSG00000004098
	ENSMUSG00000024575		ENSMUSG00000031706		ENSMUSG00000024542
	ENSMUSG00000047894		ENSMUSG00000111375		ENSMUSG00000003352
	NewGene.27785		ENSMUSG00000006390		ENSMUSG00000087651
	ENSMUSG00000022901		ENSMUSG00000030220		ENSMUSG00000024968
	ENSMUSG00000047945		ENSMUSG00000048416		ENSMUSG00000032902
	ENSMUSG00000051279		ENSMUSG00000039158		ENSMUSG00000055413
	ENSMUSG00000029622		ENSMUSG00000021294		ENSMUSG00000047407
	ENSMUSG00000083344		ENSMUSG00000031805		ENSMUSG00000018916
	ENSMUSG00000083087		ENSMUSG00000030889		ENSMUSG00000003420
	NewGene.18776		ENSMUSG00000101431		ENSMUSG00000023019
	ENSMUSG00000031497		ENSMUSG00000002083		ENSMUSG00000049922
	ENSMUSG00000104724		ENSMUSG00000005465		ENSMUSG00000007050
	ENSMUSG00000095612		ENSMUSG00000031626		ENSMUSG00000002103
	ENSMUSG00000026458		ENSMUSG00000030402		ENSMUSG00000044646
	ENSMUSG00000022831		ENSMUSG00000029660		ENSMUSG00000071551
	ENSMUSG00000039198		ENSMUSG00000000409		ENSMUSG00000060180
	ENSMUSG00000024610		ENSMUSG00000029155		ENSMUSG00000038482
	ENSMUSG00000067341		ENSMUSG00000022769		ENSMUSG00000021789
	ENSMUSG00000076548		ENSMUSG00000004707		ENSMUSG00000052117
	ENSMUSG00000024424		ENSMUSG00000045655		ENSMUSG00000032046
	NewGene.13312		NewGene.20607		NewGene.24246
	ENSMUSG00000032322		ENSMUSG00000022150		NewGene.1492
	ENSMUSG00000017724		ENSMUSG00000016552		NewGene.2564
	ENSMUSG00000028459		ENSMUSG00000013275		ENSMUSG00000030114
	ENSMUSG00000022488		ENSMUSG00000054252		ENSMUSG00000020650
	ENSMUSG00000031933		ENSMUSG00000021182		ENSMUSG00000028843
	ENSMUSG00000000290		ENSMUSG00000097471		ENSMUSG00000030929
	ENSMUSG00000036322		ENSMUSG00000057262		ENSMUSG00000044339
	ENSMUSG00000080002		ENSMUSG00000055805		ENSMUSG00000028927
	ENSMUSG00000030126		ENSMUSG00000029217		ENSMUSG00000093482
	ENSMUSG00000041859		ENSMUSG00000041986		ENSMUSG00000037995
	ENSMUSG00000039109		ENSMUSG00000097312		ENSMUSG00000049686
	ENSMUSG00000000567		ENSMUSG00000052270		ENSMUSG00000027540
	ENSMUSG00000029366		ENSMUSG00000041323		ENSMUSG00000097141
	ENSMUSG00000064267		ENSMUSG00000094683		ENSMUSG00000035165
	ENSMUSG00000063177		ENSMUSG00000009097		ENSMUSG00000025163
	ENSMUSG00000029254		ENSMUSG00000082536		ENSMUSG00000007833
	NewGene.6058		ENSMUSG00000036323		ENSMUSG00000050377
	ENSMUSG00000033737		ENSMUSG00000028637		ENSMUSG00000029660
	ENSMUSG00000024177		ENSMUSG00000039804		ENSMUSG00000096727
	ENSMUSG00000022070		ENSMUSG00000033220		ENSMUSG00000090021
	ENSMUSG00000094162		ENSMUSG00000064280		ENSMUSG00000020806
	ENSMUSG00000022367		ENSMUSG00000038453		ENSMUSG00000093485
	ENSMUSG00000045502		ENSMUSG00000112023		ENSMUSG00000027938
	ENSMUSG00000058897		ENSMUSG00000095677		ENSMUSG00000002603
	ENSMUSG00000028786		ENSMUSG00000023806		ENSMUSG00000029163
	ENSMUSG00000022665		ENSMUSG00000041132		ENSMUSG00000006456
	ENSMUSG00000006800		ENSMUSG00000004815		ENSMUSG00000054408
	ENSMUSG00000034871		ENSMUSG00000023764		ENSMUSG00000030302
	ENSMUSG00000052142		ENSMUSG00000009292		NewGene.3393
	ENSMUSG00000029121		ENSMUSG00000004266		ENSMUSG00000037636
	ENSMUSG00000079168		ENSMUSG00000036019		ENSMUSG00000059430
	ENSMUSG00000027224		ENSMUSG00000019320		ENSMUSG00000040188
	ENSMUSG00000067321		ENSMUSG00000006435		ENSMUSG00000020331
	ENSMUSG00000047810		ENSMUSG00000090291		ENSMUSG00000043931
	ENSMUSG00000027720		ENSMUSG00000036908		ENSMUSG00000069939
	ENSMUSG00000082419		ENSMUSG00000026411		NewGene.28598
	ENSMUSG00000054672		ENSMUSG00000023266		ENSMUSG00000059248
	ENSMUSG00000004207		ENSMUSG00000054520		ENSMUSG00000016552
	ENSMUSG00000025007		ENSMUSG00000020894		ENSMUSG00000108218
	ENSMUSG00000085321		ENSMUSG00000051435		ENSMUSG00000060459
	ENSMUSG00000112980		ENSMUSG00000020272		ENSMUSG00000027420
	ENSMUSG00000019320		ENSMUSG00000019564		ENSMUSG00000050105
	ENSMUSG00000067149		ENSMUSG00000015957		ENSMUSG00000029175
	ENSMUSG00000108348		ENSMUSG00000032024		ENSMUSG00000017493
	NewGene.24518		ENSMUSG00000031438		NewGene.12871
	ENSMUSG00000030670		ENSMUSG00000054517		ENSMUSG00000021003
	ENSMUSG00000045826		ENSMUSG00000034854		ENSMUSG00000096458
	ENSMUSG00000025321		ENSMUSG00000010044		ENSMUSG00000006517
	ENSMUSG00000095497		ENSMUSG00000070576		ENSMUSG00000021733
	ENSMUSG00000096459		ENSMUSG00000024206		ENSMUSG00000105509
	ENSMUSG00000000392		ENSMUSG00000054320		ENSMUSG00000019768
	ENSMUSG00000083220		ENSMUSG00000042404		ENSMUSG00000034591
	ENSMUSG00000050967		ENSMUSG00000052957		ENSMUSG00000064109
	ENSMUSG00000025610		ENSMUSG00000025407		ENSMUSG00000060090
	ENSMUSG00000041324		ENSMUSG00000028634		ENSMUSG00000031129
	ENSMUSG00000033220		ENSMUSG00000022014		ENSMUSG00000076928
	ENSMUSG00000052889		ENSMUSG00000096255		ENSMUSG00000020520
	ENSMUSG00000084989		ENSMUSG00000025602		ENSMUSG00000030336
	ENSMUSG00000080917		ENSMUSG00000004187		ENSMUSG00000017760
	ENSMUSG00000035960		ENSMUSG00000047907		ENSMUSG00000039238
	ENSMUSG00000031608		ENSMUSG00000031827		ENSMUSG00000081208
	ENSMUSG00000040675		ENSMUSG00000047945		ENSMUSG00000042462
	ENSMUSG00000022225		ENSMUSG00000028931		ENSMUSG00000015745
	ENSMUSG00000027281		ENSMUSG00000026480		ENSMUSG00000025068
	NewGene.16931		ENSMUSG00000041642		ENSMUSG00000035713
	ENSMUSG00000046623		ENSMUSG00000045374		ENSMUSG00000063810
	ENSMUSG00000056130		ENSMUSG00000094686		ENSMUSG00000048402
	ENSMUSG00000090061		ENSMUSG00000026458		ENSMUSG00000059089
	ENSMUSG00000113871		ENSMUSG00000012350		ENSMUSG00000074738
	ENSMUSG00000080115		ENSMUSG00000027009		ENSMUSG00000027398
	ENSMUSG00000053063		ENSMUSG00000004552		ENSMUSG00000032185
	ENSMUSG00000031654		ENSMUSG00000079225		ENSMUSG00000025915
	ENSMUSG00000076668		ENSMUSG00000017007		ENSMUSG00000041164
	ENSMUSG00000089669		ENSMUSG00000053846		ENSMUSG00000010175
	ENSMUSG00000030114		ENSMUSG00000027398		ENSMUSG00000024556
	ENSMUSG00000032826		ENSMUSG00000070873		ENSMUSG00000021556
	ENSMUSG00000073242		ENSMUSG00000085967		ENSMUSG00000032093
	ENSMUSG00000057346		NewGene.8718		ENSMUSG00000056749
	ENSMUSG00000015776		ENSMUSG00000030539		ENSMUSG00000096954
	ENSMUSG00000113965		ENSMUSG00000105096		ENSMUSG00000097537
	ENSMUSG00000037649		ENSMUSG00000024965		ENSMUSG00000074419
	ENSMUSG00000031629		ENSMUSG00000028914		ENSMUSG00000029449
	ENSMUSG00000031264		ENSMUSG00000031737		ENSMUSG00000027346
	ENSMUSG00000021730		ENSMUSG00000028437		ENSMUSG00000046879
	ENSMUSG00000055421		ENSMUSG00000013707		ENSMUSG00000028159
	ENSMUSG00000024621		ENSMUSG00000023030		ENSMUSG00000002489
	ENSMUSG00000020334		ENSMUSG00000025348		ENSMUSG00000072437
	ENSMUSG00000072620		ENSMUSG00000030397		ENSMUSG00000021676
	ENSMUSG00000103220		ENSMUSG00000032280		ENSMUSG00000030759
	ENSMUSG00000076564		ENSMUSG00000039899		ENSMUSG00000025352
	ENSMUSG00000032860		ENSMUSG00000082286		ENSMUSG00000032595
	ENSMUSG00000095514		ENSMUSG00000069806		ENSMUSG00000037946
	ENSMUSG00000104291		ENSMUSG00000023805		ENSMUSG00000039873
	ENSMUSG00000023947		ENSMUSG00000029647		ENSMUSG00000027863
	ENSMUSG00000091864		ENSMUSG00000037447		ENSMUSG00000050106
	ENSMUSG00000058818		ENSMUSG00000020231		ENSMUSG00000050921
	ENSMUSG00000109841		ENSMUSG00000030737		ENSMUSG00000030254
	ENSMUSG00000052102		ENSMUSG00000000594		ENSMUSG00000054115
	ENSMUSG00000049588		ENSMUSG00000040703		ENSMUSG00000045362
	ENSMUSG00000062073		ENSMUSG00000029603		ENSMUSG00000024937
	ENSMUSG00000095007		ENSMUSG00000035305		ENSMUSG00000030187
	NewGene.10433		NewGene.25788		ENSMUSG00000067780
	ENSMUSG00000107427		NewGene.25787		ENSMUSG00000032776
	ENSMUSG00000070644		ENSMUSG00000030650		ENSMUSG00000020941
	ENSMUSG00000019832		ENSMUSG00000102049		ENSMUSG00000032691
	ENSMUSG00000063193		ENSMUSG00000041477		ENSMUSG00000046111
	ENSMUSG00000037321		ENSMUSG00000039809		ENSMUSG00000070699
	ENSMUSG00000049526		ENSMUSG00000039738		ENSMUSG00000095042
	ENSMUSG00000059674		ENSMUSG00000061718		ENSMUSG00000025888
	NewGene.15746		ENSMUSG00000025314		ENSMUSG00000025227
	ENSMUSG00000063232		ENSMUSG00000081492		ENSMUSG00000031803
	ENSMUSG00000020732		ENSMUSG00000026748		ENSMUSG00000020072
	ENSMUSG00000028792		ENSMUSG00000022358		ENSMUSG00000074852
	ENSMUSG00000078942		ENSMUSG00000063193		ENSMUSG00000039252
	ENSMUSG00000027317		ENSMUSG00000096129		ENSMUSG00000057069
	ENSMUSG00000018486		ENSMUSG00000070509		ENSMUSG00000020787
	ENSMUSG00000030263		ENSMUSG00000038346		ENSMUSG00000073565
	ENSMUSG00000042262		ENSMUSG00000026185		ENSMUSG00000074785
	ENSMUSG00000078945		ENSMUSG00000039853		ENSMUSG00000031266
	ENSMUSG00000026415		ENSMUSG00000024084		ENSMUSG00000021591
	ENSMUSG00000076615		ENSMUSG00000032577		ENSMUSG00000000308
	ENSMUSG00000031362		ENSMUSG00000046886		NewGene.13779
	ENSMUSG00000095958		ENSMUSG00000029622		ENSMUSG00000020527
	ENSMUSG00000035273		ENSMUSG00000038910		ENSMUSG00000025557
	ENSMUSG00000049305		ENSMUSG00000020329		ENSMUSG00000044092
	ENSMUSG00000030468		ENSMUSG00000052273		ENSMUSG00000109511
	ENSMUSG00000024014		ENSMUSG00000033295		ENSMUSG00000039621
	ENSMUSG00000102700		ENSMUSG00000017929		ENSMUSG00000098172
	ENSMUSG00000002297		ENSMUSG00000058624		NewGene.1887
	ENSMUSG00000033427		ENSMUSG00000020679		ENSMUSG00000030147
	ENSMUSG00000032815		ENSMUSG00000030800		ENSMUSG00000041046
	ENSMUSG00000072789		ENSMUSG00000050640		NewGene.11856
	ENSMUSG00000076534		ENSMUSG00000051457		ENSMUSG00000026737
	ENSMUSG00000024669		ENSMUSG00000025733		ENSMUSG00000085611
	ENSMUSG00000076596		ENSMUSG00000028101		ENSMUSG00000002458
	ENSMUSG00000046598		ENSMUSG00000025900		ENSMUSG00000057406
	ENSMUSG00000034997		NewGene.12676		ENSMUSG00000030142
	ENSMUSG00000044165		ENSMUSG00000052613		NewGene.3440
	ENSMUSG00000043333		ENSMUSG00000024743		ENSMUSG00000020737
	NewGene.3454		ENSMUSG00000024053		ENSMUSG00000096670
	ENSMUSG00000025466		ENSMUSG00000028555		ENSMUSG00000021587
	ENSMUSG00000020377		ENSMUSG00000026012		ENSMUSG00000074071
	ENSMUSG00000023982		ENSMUSG00000027427		ENSMUSG00000060224
	NewGene.17362		ENSMUSG00000022436		ENSMUSG00000039842
	ENSMUSG00000002870		ENSMUSG00000039552		ENSMUSG00000032014
	ENSMUSG00000111088		ENSMUSG00000034041		ENSMUSG00000055865
	ENSMUSG00000024810		ENSMUSG00000029442		ENSMUSG00000035914
	ENSMUSG00000063445		ENSMUSG00000047330		ENSMUSG00000033589
	ENSMUSG00000044206		ENSMUSG00000067629		ENSMUSG00000107478
	ENSMUSG00000093861		ENSMUSG00000097852		ENSMUSG00000027230
	ENSMUSG00000063954		ENSMUSG00000097632		ENSMUSG00000037020
	ENSMUSG00000036249		ENSMUSG00000026069		ENSMUSG00000015766
	ENSMUSG00000040747		ENSMUSG00000022876		ENSMUSG00000055172
	ENSMUSG00000076745		ENSMUSG00000041268		ENSMUSG00000040282
	ENSMUSG00000103273		ENSMUSG00000053158		ENSMUSG00000079543
	ENSMUSG00000031910		ENSMUSG00000021579		ENSMUSG00000020228
	ENSMUSG00000097149		ENSMUSG00000060176		ENSMUSG00000044017
	ENSMUSG00000003355		ENSMUSG00000045036		ENSMUSG00000031453
	ENSMUSG00000032122		ENSMUSG00000085385		ENSMUSG00000006715
	ENSMUSG00000086712		ENSMUSG00000103772		ENSMUSG00000027894
	ENSMUSG00000061833		ENSMUSG00000047875		ENSMUSG00000015568
	ENSMUSG00000093394		ENSMUSG00000062939		ENSMUSG00000022440
	ENSMUSG00000070524		ENSMUSG00000078584		ENSMUSG00000037922
	ENSMUSG00000026043		ENSMUSG00000022321		ENSMUSG00000015083
	ENSMUSG00000034416		ENSMUSG00000029165		ENSMUSG00000021700
	ENSMUSG00000028312		ENSMUSG00000006476		ENSMUSG00000040701
	ENSMUSG00000095788		ENSMUSG00000036833		ENSMUSG00000062896
	ENSMUSG00000015355		ENSMUSG00000020227		ENSMUSG00000022489
	ENSMUSG00000056413		ENSMUSG00000085636		ENSMUSG00000042225
	ENSMUSG00000085887		ENSMUSG00000025780		ENSMUSG00000002228
	ENSMUSG00000034947		ENSMUSG00000029490		ENSMUSG00000014030
	ENSMUSG00000097589		ENSMUSG00000024621		ENSMUSG00000027242
	ENSMUSG00000038115		ENSMUSG00000022106		ENSMUSG00000107502
	ENSMUSG00000025758		ENSMUSG00000021062		ENSMUSG00000048163
	ENSMUSG00000097008		ENSMUSG00000029413		ENSMUSG00000031527
	ENSMUSG00000030218		ENSMUSG00000007891		ENSMUSG00000029363
	ENSMUSG00000044976		ENSMUSG00000030329		NewGene.22865
	ENSMUSG00000051906		NewGene.11856		ENSMUSG00000036377
	ENSMUSG00000026815		ENSMUSG00000029822		ENSMUSG00000027635
	ENSMUSG00000039257		ENSMUSG00000003032		ENSMUSG00000084911
	ENSMUSG00000033227		ENSMUSG00000044433		ENSMUSG00000001864
	ENSMUSG00000033538		ENSMUSG00000052102		ENSMUSG00000029772
	ENSMUSG00000031494		ENSMUSG00000002058		ENSMUSG00000022665
	ENSMUSG00000089998		ENSMUSG00000038608		ENSMUSG00000004043
	ENSMUSG00000076749		ENSMUSG00000002489		ENSMUSG00000067276
	ENSMUSG00000096106		ENSMUSG00000060112		ENSMUSG00000032020
	ENSMUSG00000061232		ENSMUSG00000059456		ENSMUSG00000086513
	ENSMUSG00000055978		ENSMUSG00000025324		ENSMUSG00000030643
	ENSMUSG00000094094		ENSMUSG00000026749		ENSMUSG00000003863
	ENSMUSG00000028337		ENSMUSG00000000282		ENSMUSG00000052837
	ENSMUSG00000047586		ENSMUSG00000017639		ENSMUSG00000052821
	ENSMUSG00000042678		ENSMUSG00000030761		ENSMUSG00000025192
	ENSMUSG00000079445		ENSMUSG00000005125		ENSMUSG00000092470
	ENSMUSG00000084885		ENSMUSG00000049922		ENSMUSG00000048677
	ENSMUSG00000028071		ENSMUSG00000001419		ENSMUSG00000039853
	NewGene.10634		ENSMUSG00000028028		ENSMUSG00000035697
	ENSMUSG00000018459		ENSMUSG00000089762		ENSMUSG00000005465
	ENSMUSG00000101585		ENSMUSG00000096780		ENSMUSG00000105558
	ENSMUSG00000020399		ENSMUSG00000052234		ENSMUSG00000025128
	ENSMUSG00000108084		ENSMUSG00000000326		NewGene.5650
	ENSMUSG00000079492		ENSMUSG00000021258		ENSMUSG00000062075
	ENSMUSG00000106943		ENSMUSG00000024030		ENSMUSG00000003617
	NewGene.27793		ENSMUSG00000018821		ENSMUSG00000047370
	ENSMUSG00000053113		ENSMUSG00000032020		NewGene.12709
	ENSMUSG00000046993		ENSMUSG00000031103		ENSMUSG00000042429
	ENSMUSG00000025507		ENSMUSG00000098176		ENSMUSG00000005442
	ENSMUSG00000097526		ENSMUSG00000027339		ENSMUSG00000039577
	ENSMUSG00000043719		ENSMUSG00000024937		ENSMUSG00000035459
	ENSMUSG00000092243		ENSMUSG00000027340		ENSMUSG00000030924
	ENSMUSG00000040314		ENSMUSG00000022528		ENSMUSG00000074280
	ENSMUSG00000069804		ENSMUSG00000062210		ENSMUSG00000072421
	NewGene.2184		ENSMUSG00000011256		ENSMUSG00000021908
	ENSMUSG00000036594		ENSMUSG00000035673		ENSMUSG00000107086
	ENSMUSG00000030103		ENSMUSG00000001248		ENSMUSG00000001506
	NewGene.26095		ENSMUSG00000034460		ENSMUSG00000059195
	ENSMUSG00000085007		ENSMUSG00000031903		ENSMUSG00000062609
	ENSMUSG00000061397		ENSMUSG00000028159		ENSMUSG00000111171
	ENSMUSG00000073490		ENSMUSG00000042428		ENSMUSG00000033852
	ENSMUSG00000024965		ENSMUSG00000041164		ENSMUSG00000067321
	ENSMUSG00000055629		ENSMUSG00000044393		ENSMUSG00000029616
	ENSMUSG00000033777		ENSMUSG00000020733		ENSMUSG00000032024
	ENSMUSG00000090894		ENSMUSG00000033697		ENSMUSG00000059493
	ENSMUSG00000055541		ENSMUSG00000034675		ENSMUSG00000011256
	ENSMUSG00000101517		ENSMUSG00000024011		ENSMUSG00000029401
	ENSMUSG00000033576		ENSMUSG00000032788		ENSMUSG00000031362
	ENSMUSG00000106735		ENSMUSG00000031833		ENSMUSG00000004902
	ENSMUSG00000108801		ENSMUSG00000038384		ENSMUSG00000034457
	ENSMUSG00000090564		ENSMUSG00000038402		ENSMUSG00000036353
	ENSMUSG00000044254		ENSMUSG00000045165		ENSMUSG00000026596
	ENSMUSG00000026177		ENSMUSG00000000149		ENSMUSG00000050232
	ENSMUSG00000020279		ENSMUSG00000026430		ENSMUSG00000021256
	ENSMUSG00000049625		ENSMUSG00000035064		ENSMUSG00000016624
	ENSMUSG00000076937		ENSMUSG00000041654		ENSMUSG00000038843
	ENSMUSG00000110079		ENSMUSG00000029581		ENSMUSG00000026134
	ENSMUSG00000004359		ENSMUSG00000042744		ENSMUSG00000038301
	NewGene.11683		ENSMUSG00000048234		ENSMUSG00000000594
	ENSMUSG00000090166		ENSMUSG00000021948		ENSMUSG00000102602
	ENSMUSG00000097157		ENSMUSG00000033016		ENSMUSG00000043613
	ENSMUSG00000005054		ENSMUSG00000045216		ENSMUSG00000020275
	ENSMUSG00000017697		ENSMUSG00000001918		ENSMUSG00000029217
	ENSMUSG00000095170		ENSMUSG00000030269		ENSMUSG00000056219
	ENSMUSG00000002835		ENSMUSG00000111128		ENSMUSG00000025348
	ENSMUSG00000050107		ENSMUSG00000026737		ENSMUSG00000042417
	ENSMUSG00000049734		ENSMUSG00000042644		ENSMUSG00000062661
	NewGene.3442		ENSMUSG00000020810		ENSMUSG00000036046
	NewGene.3443		ENSMUSG00000056493		ENSMUSG00000031103
	ENSMUSG00000079444		ENSMUSG00000020400		ENSMUSG00000053158
	NewGene.12745		ENSMUSG00000020228		ENSMUSG00000059336
	NewGene.5391		ENSMUSG00000025153		ENSMUSG00000055805
	ENSMUSG00000054072		ENSMUSG00000031391		ENSMUSG00000046687
	ENSMUSG00000037337		ENSMUSG00000026483		ENSMUSG00000067916
	ENSMUSG00000015437		ENSMUSG00000032059		ENSMUSG00000039193
	ENSMUSG00000031765		ENSMUSG00000022952		ENSMUSG00000044469
	ENSMUSG00000108126		ENSMUSG00000028708		ENSMUSG00000102418
	ENSMUSG00000107909		ENSMUSG00000041757		ENSMUSG00000036155
	ENSMUSG00000031438				ENSMUSG00000047875
	ENSMUSG00000045322				ENSMUSG00000046971
	ENSMUSG00000027555				ENSMUSG00000048763
	ENSMUSG00000000562				ENSMUSG00000002257
	ENSMUSG00000033762				ENSMUSG00000044854
	ENSMUSG00000034652				ENSMUSG00000031381
	ENSMUSG00000108578				ENSMUSG00000024030
	ENSMUSG00000040229				ENSMUSG00000022651
	ENSMUSG00000076575				ENSMUSG00000028614
	ENSMUSG00000074006				ENSMUSG00000023982
	ENSMUSG00000013766				NewGene.22518
	ENSMUSG00000031662				ENSMUSG00000082319
	ENSMUSG00000002992				ENSMUSG00000015476
	ENSMUSG00000036820				ENSMUSG00000026784
	ENSMUSG00000028874				ENSMUSG00000041797
	ENSMUSG00000024353				ENSMUSG00000048277
	ENSMUSG00000073489				ENSMUSG00000100774
	ENSMUSG00000040907				ENSMUSG00000078440
	ENSMUSG00000039798				ENSMUSG00000031849
	ENSMUSG00000034329				ENSMUSG00000001763
	ENSMUSG00000022226				ENSMUSG00000030724
	ENSMUSG00000025279				ENSMUSG00000104350
	ENSMUSG00000034266				ENSMUSG00000031497
	ENSMUSG00000030865				ENSMUSG00000025185
	ENSMUSG00000004864				ENSMUSG00000078771
	ENSMUSG00000020261				ENSMUSG00000074657
	ENSMUSG00000032436				NewGene.16995
	ENSMUSG00000033386				ENSMUSG00000111167
	ENSMUSG00000042942				ENSMUSG00000034675
	ENSMUSG00000105954				NewGene.10338
	ENSMUSG00000020437				ENSMUSG00000051998
	ENSMUSG00000024349				ENSMUSG00000062007
	ENSMUSG00000045751				ENSMUSG00000079003
	ENSMUSG00000096979				ENSMUSG00000090891
	ENSMUSG00000020901				ENSMUSG00000018920
	ENSMUSG00000034206				ENSMUSG00000024781
	ENSMUSG00000024590				ENSMUSG00000020241
	ENSMUSG00000104835				ENSMUSG00000047415
	ENSMUSG00000000791				ENSMUSG00000080242
	ENSMUSG00000038963				NewGene.7086
	ENSMUSG00000075502				ENSMUSG00000094683
	ENSMUSG00000028362				ENSMUSG00000038352
	ENSMUSG00000040627				ENSMUSG00000085917
	NewGene.15714				ENSMUSG00000049744
	ENSMUSG00000096638				ENSMUSG00000110195
	ENSMUSG00000039084				ENSMUSG00000061119
	ENSMUSG00000048012				ENSMUSG00000033826
	ENSMUSG00000035896				ENSMUSG00000013974
	ENSMUSG00000086706				ENSMUSG00000049404
	ENSMUSG00000021506				ENSMUSG00000045231
	NewGene.9949				ENSMUSG00000050503
	ENSMUSG00000040528				ENSMUSG00000033222
	ENSMUSG00000006519				ENSMUSG00000046070
	NewGene.17916				ENSMUSG00000046456
	ENSMUSG00000090164				ENSMUSG00000025648
	ENSMUSG00000081467				ENSMUSG00000042423
	ENSMUSG00000079484				ENSMUSG00000021262
	ENSMUSG00000041774				ENSMUSG00000109498
	ENSMUSG00000034579				ENSMUSG00000030844
	NewGene.13336				ENSMUSG00000034959
	ENSMUSG00000030745				ENSMUSG00000097971
	ENSMUSG00000112808				ENSMUSG00000057457
	ENSMUSG00000024682				ENSMUSG00000026341
	NewGene.7115				ENSMUSG00000034663
	ENSMUSG00000087107				ENSMUSG00000030220
	ENSMUSG00000086245				ENSMUSG00000051343
	ENSMUSG00000042096				ENSMUSG00000020926
	ENSMUSG00000035493				ENSMUSG00000052241
	ENSMUSG00000021939				ENSMUSG00000056888
	ENSMUSG00000017002				ENSMUSG00000020974
	ENSMUSG00000095609				ENSMUSG00000027959
	ENSMUSG00000021765				ENSMUSG00000024330
	ENSMUSG00000034342				ENSMUSG00000108892
	ENSMUSG00000029910				ENSMUSG00000036948
	ENSMUSG00000062082				ENSMUSG00000058729
	ENSMUSG00000061540				ENSMUSG00000029720
	ENSMUSG00000110697				ENSMUSG00000107215
	ENSMUSG00000096351				ENSMUSG00000039787
	ENSMUSG00000078653				ENSMUSG00000034165
	ENSMUSG00000053338				ENSMUSG00000113425
	ENSMUSG00000080773				ENSMUSG00000027533
	ENSMUSG00000040276				ENSMUSG00000059060
	ENSMUSG00000032586				ENSMUSG00000039153
	ENSMUSG00000017607				ENSMUSG00000028793
	ENSMUSG00000034764				ENSMUSG00000029821
	ENSMUSG00000036805				ENSMUSG00000026749
	NewGene.17109				ENSMUSG00000026981
	ENSMUSG00000042029				ENSMUSG00000055994
	ENSMUSG00000022945				ENSMUSG00000037224
	ENSMUSG00000021190				ENSMUSG00000060216
	ENSMUSG00000035200				ENSMUSG00000049823
	ENSMUSG00000038729				ENSMUSG00000030365
	ENSMUSG00000048217				ENSMUSG00000063245
	ENSMUSG00000021453				ENSMUSG00000093384
	ENSMUSG00000091050				ENSMUSG00000078700
	ENSMUSG00000000552				ENSMUSG00000109715
	NewGene.18701				ENSMUSG00000040247
	ENSMUSG00000112895				ENSMUSG00000033467
	ENSMUSG00000071005				ENSMUSG00000005142
	ENSMUSG00000013338				ENSMUSG00000028792
	ENSMUSG00000025498				ENSMUSG00000076441
	ENSMUSG00000024053				ENSMUSG00000046169
	ENSMUSG00000028931				ENSMUSG00000051855
	ENSMUSG00000028212				ENSMUSG00000022439
	ENSMUSG00000052271				ENSMUSG00000039497
	ENSMUSG00000053175				ENSMUSG00000013766
	ENSMUSG00000076535				ENSMUSG00000030104
	ENSMUSG00000037548				ENSMUSG00000063130
	ENSMUSG00000110588				ENSMUSG00000021773
	ENSMUSG00000096156				ENSMUSG00000079362
	ENSMUSG00000022014				ENSMUSG00000056069
	ENSMUSG00000018008				ENSMUSG00000032782
	ENSMUSG00000023247				ENSMUSG00000001588
	ENSMUSG00000035692				ENSMUSG00000055958
	ENSMUSG00000037280				ENSMUSG00000034028
	ENSMUSG00000095028				NewGene.1610
	ENSMUSG00000067768				ENSMUSG00000040563
	ENSMUSG00000015947				ENSMUSG00000038623
	ENSMUSG00000092021				ENSMUSG00000052087
	ENSMUSG00000020609				ENSMUSG00000108732
	ENSMUSG00000012428				ENSMUSG00000018362
	ENSMUSG00000104649				ENSMUSG00000029490
	ENSMUSG00000090634				ENSMUSG00000045045
	ENSMUSG00000052212				ENSMUSG00000100280
	ENSMUSG00000057191				ENSMUSG00000035355
	ENSMUSG00000070000				ENSMUSG00000026815
	ENSMUSG00000015314				ENSMUSG00000025779
	ENSMUSG00000028066				NewGene.26276
	NewGene.22223				NewGene.4478
	ENSMUSG00000061577				ENSMUSG00000003746
	ENSMUSG00000109973				ENSMUSG00000039109
	ENSMUSG00000044244				ENSMUSG00000109841
	ENSMUSG00000026628				ENSMUSG00000031093
	ENSMUSG00000111094				ENSMUSG00000021815
	ENSMUSG00000021322				ENSMUSG00000026646
	ENSMUSG00000005220				ENSMUSG00000025395
	ENSMUSG00000054717				ENSMUSG00000059995
	ENSMUSG00000034570				ENSMUSG00000051920
	ENSMUSG00000027322				ENSMUSG00000028364
	ENSMUSG00000026579				ENSMUSG00000049305
	ENSMUSG00000041449				ENSMUSG00000030322
	ENSMUSG00000089844				ENSMUSG00000050822
	ENSMUSG00000065987				ENSMUSG00000090307
	ENSMUSG00000107552				ENSMUSG00000028480
	ENSMUSG00000025747				ENSMUSG00000021765
	ENSMUSG00000076670				ENSMUSG00000000409
	ENSMUSG00000067714				ENSMUSG00000001751
	ENSMUSG00000016256				ENSMUSG00000036086
	ENSMUSG00000090230				ENSMUSG00000021675
	ENSMUSG00000056531				ENSMUSG00000038608
	ENSMUSG00000078867				ENSMUSG00000038179
	ENSMUSG00000052726				ENSMUSG00000112468
	ENSMUSG00000022346				ENSMUSG00000063524
	ENSMUSG00000013707				ENSMUSG00000021707
	ENSMUSG00000028671				ENSMUSG00000031903
	ENSMUSG00000030043				ENSMUSG00000019866
	ENSMUSG00000041605				ENSMUSG00000091649
	ENSMUSG00000039313				ENSMUSG00000073010
	ENSMUSG00000022881				ENSMUSG00000038034
	ENSMUSG00000033871				ENSMUSG00000026616
	ENSMUSG00000030793				ENSMUSG00000038644
	ENSMUSG00000051235				NewGene.21615
	NewGene.17594				ENSMUSG00000090272
	NewGene.12597				ENSMUSG00000046711
	ENSMUSG00000050010				ENSMUSG00000026579
	ENSMUSG00000059430				ENSMUSG00000019564
	ENSMUSG00000085873				ENSMUSG00000094526
	ENSMUSG00000021384				ENSMUSG00000040350
	ENSMUSG00000079547				ENSMUSG00000026110
	ENSMUSG00000026073				ENSMUSG00000021175
	NewGene.10431				ENSMUSG00000097703
	ENSMUSG00000019853				ENSMUSG00000021795
	ENSMUSG00000085129				ENSMUSG00000025429
	ENSMUSG00000054342				ENSMUSG00000037697
	ENSMUSG00000039783				ENSMUSG00000050010
	ENSMUSG00000096490				ENSMUSG00000006310
	ENSMUSG00000026480				ENSMUSG00000045733
	ENSMUSG00000022180				ENSMUSG00000047654
	ENSMUSG00000020891				ENSMUSG00000041654
	ENSMUSG00000021702				ENSMUSG00000034906
	ENSMUSG00000094797				ENSMUSG00000026065
	ENSMUSG00000028238				ENSMUSG00000095865
	ENSMUSG00000031142				ENSMUSG00000078439
	ENSMUSG00000050896				ENSMUSG00000004864
	ENSMUSG00000046997				ENSMUSG00000018507
	ENSMUSG00000031596				ENSMUSG00000035448
	NewGene.11812				ENSMUSG00000037126
	ENSMUSG00000038037				ENSMUSG00000020234
	ENSMUSG00000110126				ENSMUSG00000022500
	ENSMUSG00000049932				ENSMUSG00000006678
	ENSMUSG00000019773				ENSMUSG00000038521
	ENSMUSG00000056394				ENSMUSG00000068227
	ENSMUSG00000008318				ENSMUSG00000040693
	ENSMUSG00000030162				ENSMUSG00000042942
	ENSMUSG00000034987				ENSMUSG00000028744
	ENSMUSG00000038147				ENSMUSG00000007613
	ENSMUSG00000078452				ENSMUSG00000087445
	ENSMUSG00000059326				ENSMUSG00000085890
	ENSMUSG00000095366				ENSMUSG00000022416
	ENSMUSG00000001497				ENSMUSG00000105950
	ENSMUSG00000040522				ENSMUSG00000103593
	ENSMUSG00000051212				ENSMUSG00000051457
	ENSMUSG00000076532				ENSMUSG00000025017
	ENSMUSG00000025154				ENSMUSG00000030592
	ENSMUSG00000085995				ENSMUSG00000033538
	ENSMUSG00000027797				ENSMUSG00000027855
	ENSMUSG00000085058				ENSMUSG00000026117
	ENSMUSG00000029123				ENSMUSG00000022479
	ENSMUSG00000022595				ENSMUSG00000034275
	ENSMUSG00000021913				ENSMUSG00000006344
	ENSMUSG00000112234				NewGene.17595
	ENSMUSG00000015652				ENSMUSG00000109279
	ENSMUSG00000040658				ENSMUSG00000049109
	ENSMUSG00000020787				ENSMUSG00000028782
	ENSMUSG00000103358				ENSMUSG00000111929
	ENSMUSG00000001473				ENSMUSG00000009687
	ENSMUSG00000048031				ENSMUSG00000090551
	ENSMUSG00000038112				ENSMUSG00000070713
	ENSMUSG00000055546				ENSMUSG00000102140
	ENSMUSG00000110266				ENSMUSG00000085376
	ENSMUSG00000074026				ENSMUSG00000045917
	ENSMUSG00000026405				ENSMUSG00000004473
	ENSMUSG00000058624				ENSMUSG00000089669
	ENSMUSG00000094151				ENSMUSG00000076652
	ENSMUSG00000026196				ENSMUSG00000031971
	ENSMUSG00000094027				ENSMUSG00000036833
	ENSMUSG00000030361				ENSMUSG00000024177
	ENSMUSG00000046908				ENSMUSG00000039206
	ENSMUSG00000025929				ENSMUSG00000048899
	ENSMUSG00000021565				ENSMUSG00000098178
	ENSMUSG00000076556				ENSMUSG00000030798
	ENSMUSG00000076547				ENSMUSG00000036246
	ENSMUSG00000045312				ENSMUSG00000027423
	ENSMUSG00000099583				NewGene.826
	ENSMUSG00000085360				ENSMUSG00000031162
	ENSMUSG00000028262				ENSMUSG00000032207
	ENSMUSG00000064246				ENSMUSG00000033182
	ENSMUSG00000060989				ENSMUSG00000035896
	ENSMUSG00000055170				ENSMUSG00000017929
	ENSMUSG00000058022				ENSMUSG00000019852
	ENSMUSG00000024124				NewGene.18029
	ENSMUSG00000058163				ENSMUSG00000035158
	ENSMUSG00000029919				ENSMUSG00000037907
	ENSMUSG00000034023				ENSMUSG00000020377
	NewGene.826				ENSMUSG00000079484
	ENSMUSG00000029664				ENSMUSG00000092371
	NewGene.22224				ENSMUSG00000048234
	ENSMUSG00000036504				ENSMUSG00000009292
	ENSMUSG00000002699				ENSMUSG00000027950
	ENSMUSG00000040405				ENSMUSG00000016028
	ENSMUSG00000099757				ENSMUSG00000109799
	ENSMUSG00000041498				ENSMUSG00000044702
	NewGene.18485				ENSMUSG00000078653
	ENSMUSG00000094430				ENSMUSG00000061517
	ENSMUSG00000024660				NewGene.1992
	ENSMUSG00000048521				ENSMUSG00000019850
	ENSMUSG00000067767				ENSMUSG00000055612
	ENSMUSG00000015396				ENSMUSG00000022094
	ENSMUSG00000032327				ENSMUSG00000020097
	ENSMUSG00000029161				ENSMUSG00000044703
	ENSMUSG00000101431				ENSMUSG00000036466
	ENSMUSG00000020388				ENSMUSG00000037638
	ENSMUSG00000049103				ENSMUSG00000024525
	ENSMUSG00000023908				ENSMUSG00000070369
	ENSMUSG00000029530				ENSMUSG00000029730
	ENSMUSG00000087351				ENSMUSG00000025225
	ENSMUSG00000060188				ENSMUSG00000112297
	ENSMUSG00000026548				ENSMUSG00000070291
	ENSMUSG00000054293				ENSMUSG00000027811
	ENSMUSG00000012889				ENSMUSG00000024640
	ENSMUSG00000024032				ENSMUSG00000036931
	ENSMUSG00000050410				ENSMUSG00000020399
	ENSMUSG00000049303				ENSMUSG00000072620
	ENSMUSG00000006585				ENSMUSG00000014453
	ENSMUSG00000028011				ENSMUSG00000040675
	ENSMUSG00000030674				ENSMUSG00000022510
	ENSMUSG00000043939				ENSMUSG00000045826
	ENSMUSG00000032226				ENSMUSG00000061356
	ENSMUSG00000031162				ENSMUSG00000097078
	ENSMUSG00000039208				ENSMUSG00000070323
	NewGene.8997				ENSMUSG00000030154
	ENSMUSG00000030651				ENSMUSG00000092277
	ENSMUSG00000072596				ENSMUSG00000026833
	ENSMUSG00000078922				ENSMUSG00000030126
	ENSMUSG00000025140				ENSMUSG00000112571
	ENSMUSG00000007682				ENSMUSG00000039062
	ENSMUSG00000111720				ENSMUSG00000004266
	ENSMUSG00000002111				ENSMUSG00000029204
	ENSMUSG00000022504				ENSMUSG00000032577
	ENSMUSG00000025877				ENSMUSG00000062464
	ENSMUSG00000096594				ENSMUSG00000104452
	ENSMUSG00000087387				ENSMUSG00000021994
	ENSMUSG00000003824				ENSMUSG00000003882
	ENSMUSG00000048779				ENSMUSG00000086862
	ENSMUSG00000079017				ENSMUSG00000037640
	ENSMUSG00000076619				ENSMUSG00000024737
	ENSMUSG00000104348				ENSMUSG00000032593
	ENSMUSG00000053398				ENSMUSG00000079575
	ENSMUSG00000086742				ENSMUSG00000085720
	ENSMUSG00000047898				ENSMUSG00000021880
	ENSMUSG00000059956				ENSMUSG00000031494
	ENSMUSG00000057135				ENSMUSG00000005947
	ENSMUSG00000026069				ENSMUSG00000079685
	ENSMUSG00000020702				ENSMUSG00000025876
	ENSMUSG00000005339				ENSMUSG00000096106
	ENSMUSG00000030553				ENSMUSG00000051076
	ENSMUSG00000082433				ENSMUSG00000056612
	NewGene.10371				ENSMUSG00000109036
	ENSMUSG00000108176				ENSMUSG00000042385
	ENSMUSG00000076543				ENSMUSG00000085043
	ENSMUSG00000056737				ENSMUSG00000053687
	ENSMUSG00000023913				ENSMUSG00000045980
	ENSMUSG00000033847				ENSMUSG00000043263
	ENSMUSG00000022876				ENSMUSG00000033880
	ENSMUSG00000075420				ENSMUSG00000017718
	ENSMUSG00000037313				ENSMUSG00000039774
	ENSMUSG00000071714				ENSMUSG00000050600
	ENSMUSG00000031506				ENSMUSG00000022768
	ENSMUSG00000027408				NewGene.12597
	ENSMUSG00000094433				NewGene.27798
	ENSMUSG00000045763				ENSMUSG00000041202
	ENSMUSG00000032400				ENSMUSG00000027009
	ENSMUSG00000097855				ENSMUSG00000033272
	ENSMUSG00000030223				ENSMUSG00000034394
	ENSMUSG00000109350				ENSMUSG00000031932
	ENSMUSG00000049719				ENSMUSG00000030144
	NewGene.16074				ENSMUSG00000026958
	ENSMUSG00000001020				ENSMUSG00000021062
	ENSMUSG00000015950				ENSMUSG00000027239
	ENSMUSG00000110737				ENSMUSG00000037568
	ENSMUSG00000021768				NewGene.19667
	ENSMUSG00000071713				ENSMUSG00000086047
	NewGene.3549				ENSMUSG00000086952
	ENSMUSG00000113757				ENSMUSG00000112880
	ENSMUSG00000096883				ENSMUSG00000109244
	ENSMUSG00000079620				ENSMUSG00000026042
	ENSMUSG00000063903				ENSMUSG00000047228
	ENSMUSG00000055235				NewGene.8731
	ENSMUSG00000094777				ENSMUSG00000004446
	ENSMUSG00000022586				ENSMUSG00000005413
	ENSMUSG00000079330				ENSMUSG00000027353
	NewGene.27784				ENSMUSG00000021464
	ENSMUSG00000036928				ENSMUSG00000026786
	ENSMUSG00000054136				ENSMUSG00000072476
	ENSMUSG00000062510				ENSMUSG00000026980
	ENSMUSG00000031838				ENSMUSG00000015451
	ENSMUSG00000041219				NewGene.19529
	ENSMUSG00000020310				ENSMUSG00000097004
	ENSMUSG00000049988				ENSMUSG00000094174
	ENSMUSG00000026271				ENSMUSG00000083140
	ENSMUSG00000076587				ENSMUSG00000015652
	ENSMUSG00000054161				ENSMUSG00000087263
	ENSMUSG00000024795				ENSMUSG00000105572
	ENSMUSG00000036172				ENSMUSG00000004317
	ENSMUSG00000021391				ENSMUSG00000029436
	NewGene.7290				ENSMUSG00000028859
	ENSMUSG00000025355				ENSMUSG00000005054
	ENSMUSG00000058715				ENSMUSG00000113211
	ENSMUSG00000022871				NewGene.14999
	ENSMUSG00000022534				ENSMUSG00000031430
	ENSMUSG00000030117				ENSMUSG00000024810
	ENSMUSG00000034792				ENSMUSG00000081683
	ENSMUSG00000027454				ENSMUSG00000113070
	ENSMUSG00000089929				ENSMUSG00000050395
	ENSMUSG00000112843				ENSMUSG00000048534
	ENSMUSG00000026274				ENSMUSG00000038677
	NewGene.21670				ENSMUSG00000038388
	ENSMUSG00000070354				ENSMUSG00000036560
	ENSMUSG00000040613				ENSMUSG00000020732
	ENSMUSG00000024215				ENSMUSG00000000562
	ENSMUSG00000026475				ENSMUSG00000044712
	ENSMUSG00000021569				ENSMUSG00000016756
	ENSMUSG00000000202				ENSMUSG00000073538
	ENSMUSG00000027220				ENSMUSG00000020573
	ENSMUSG00000059498				ENSMUSG00000000794
	ENSMUSG00000026429				ENSMUSG00000041859
	ENSMUSG00000005410				ENSMUSG00000031933
	ENSMUSG00000030413				ENSMUSG00000031389
	ENSMUSG00000071715				ENSMUSG00000097541
	ENSMUSG00000049608				ENSMUSG00000022364
	ENSMUSG00000047517				ENSMUSG00000047880
	ENSMUSG00000084353				ENSMUSG00000094872
	ENSMUSG00000046804				ENSMUSG00000032350
	ENSMUSG00000000682				ENSMUSG00000026012
	ENSMUSG00000068220				ENSMUSG00000041954
	ENSMUSG00000112758				ENSMUSG00000108307
	ENSMUSG00000021614				ENSMUSG00000097558
	ENSMUSG00000005716				ENSMUSG00000022455
	ENSMUSG00000076695				ENSMUSG00000027016
	ENSMUSG00000095771				ENSMUSG00000051969
	ENSMUSG00000018774				ENSMUSG00000035364
	ENSMUSG00000015852				ENSMUSG00000079547
	ENSMUSG00000026866				ENSMUSG00000113679
	ENSMUSG00000092232				ENSMUSG00000033730
	ENSMUSG00000035041				ENSMUSG00000061232
	ENSMUSG00000031827				ENSMUSG00000046598
	NewGene.6798				NewGene.19463
	ENSMUSG00000038252				ENSMUSG00000005824
	ENSMUSG00000027832				ENSMUSG00000029622
	ENSMUSG00000022102				ENSMUSG00000078240
	ENSMUSG00000024730				ENSMUSG00000031906
	ENSMUSG00000097755				ENSMUSG00000112267
	ENSMUSG00000019214				ENSMUSG00000006281
	ENSMUSG00000021697				ENSMUSG00000052776
	ENSMUSG00000073985				ENSMUSG00000039579
	ENSMUSG00000038578				ENSMUSG00000023032
	ENSMUSG00000034311				ENSMUSG00000030579
	ENSMUSG00000078771				ENSMUSG00000096938
	ENSMUSG00000046057				ENSMUSG00000080002
	ENSMUSG00000060044				ENSMUSG00000025912
	ENSMUSG00000005057				ENSMUSG00000104649
	ENSMUSG00000026355				ENSMUSG00000095633
	ENSMUSG00000097213				ENSMUSG00000025314
	ENSMUSG00000003484				ENSMUSG00000069301
	ENSMUSG00000042254				ENSMUSG00000053746
	ENSMUSG00000039521				ENSMUSG00000095419
	ENSMUSG00000029275				ENSMUSG00000045725
	ENSMUSG00000004730				ENSMUSG00000079598
	ENSMUSG00000031562				ENSMUSG00000097919
	ENSMUSG00000039126				ENSMUSG00000045545
	ENSMUSG00000017861				ENSMUSG00000027641
	ENSMUSG00000097471				ENSMUSG00000022378
	ENSMUSG00000006403				ENSMUSG00000046413
	ENSMUSG00000040298				NewGene.16306
	ENSMUSG00000021356				ENSMUSG00000028339
	ENSMUSG00000081165				ENSMUSG00000028497
	ENSMUSG00000040010				ENSMUSG00000031880
	ENSMUSG00000049037				ENSMUSG00000036249
	ENSMUSG00000051439				ENSMUSG00000030761
	ENSMUSG00000028613				ENSMUSG00000033417
	ENSMUSG00000058952				ENSMUSG00000070564
	ENSMUSG00000024301				ENSMUSG00000021730
	ENSMUSG00000029380				ENSMUSG00000038910
	ENSMUSG00000092627				ENSMUSG00000030707
	ENSMUSG00000069306				ENSMUSG00000087538
	ENSMUSG00000030641				ENSMUSG00000025955
	ENSMUSG00000025165				ENSMUSG00000070390
	ENSMUSG00000093726				NewGene.9948
	ENSMUSG00000039519				ENSMUSG00000102555
	ENSMUSG00000025903				ENSMUSG00000082107
	ENSMUSG00000038523				ENSMUSG00000112792
	ENSMUSG00000073705				ENSMUSG00000052736
	ENSMUSG00000075402				ENSMUSG00000033316
	ENSMUSG00000039196				ENSMUSG00000026241
	ENSMUSG00000096108				ENSMUSG00000076552
	ENSMUSG00000107218				ENSMUSG00000055069
	ENSMUSG00000022860				ENSMUSG00000022595
	ENSMUSG00000036412				ENSMUSG00000110457
	ENSMUSG00000061132				ENSMUSG00000022436
	ENSMUSG00000026009				ENSMUSG00000099519
	ENSMUSG00000042002				ENSMUSG00000113587
	ENSMUSG00000061991				ENSMUSG00000049526
	ENSMUSG00000050578				ENSMUSG00000073489
	NewGene.15333				ENSMUSG00000061947
	ENSMUSG00000028197				ENSMUSG00000079845
	ENSMUSG00000079419				ENSMUSG00000108578
	ENSMUSG00000078521				ENSMUSG00000102765
	ENSMUSG00000101493				NewGene.12870
	ENSMUSG00000039942				ENSMUSG00000086527
	ENSMUSG00000058755				ENSMUSG00000075224
	ENSMUSG00000111857				ENSMUSG00000022797
	ENSMUSG00000113701				ENSMUSG00000076514
	ENSMUSG00000007080				ENSMUSG00000107427
	ENSMUSG00000000028				ENSMUSG00000031165
	ENSMUSG00000035448				ENSMUSG00000026228
	ENSMUSG00000039187				ENSMUSG00000112364
	ENSMUSG00000020415				ENSMUSG00000006519
	ENSMUSG00000018919				ENSMUSG00000091623
	ENSMUSG00000028019				ENSMUSG00000042182
	ENSMUSG00000029075				ENSMUSG00000097415
	ENSMUSG00000028072				ENSMUSG00000028896
	ENSMUSG00000022021				ENSMUSG00000066510
	ENSMUSG00000017146				ENSMUSG00000009092
	ENSMUSG00000029177				ENSMUSG00000030577
	ENSMUSG00000023031				ENSMUSG00000095457
	ENSMUSG00000067577				ENSMUSG00000076934
	ENSMUSG00000005667				ENSMUSG00000030528
	ENSMUSG00000068129				ENSMUSG00000034330
	ENSMUSG00000026535				ENSMUSG00000113311
	ENSMUSG00000032113				ENSMUSG00000040061
	ENSMUSG00000037466				ENSMUSG00000022305
	ENSMUSG00000028435				ENSMUSG00000025321
	ENSMUSG00000027737				ENSMUSG00000094365
	ENSMUSG00000028044				ENSMUSG00000024340
	ENSMUSG00000041064				ENSMUSG00000039005
	ENSMUSG00000076598				ENSMUSG00000022831
	ENSMUSG00000000617				ENSMUSG00000029560
	ENSMUSG00000027654				ENSMUSG00000103047
	ENSMUSG00000094322				ENSMUSG00000099708
	ENSMUSG00000015665				ENSMUSG00000052013
	ENSMUSG00000058427				ENSMUSG00000113894
	ENSMUSG00000078780				ENSMUSG00000042289
	ENSMUSG00000073421				ENSMUSG00000072618
	ENSMUSG00000026873				ENSMUSG00000024610
	ENSMUSG00000024164				NewGene.15431
	ENSMUSG00000036067				ENSMUSG00000040829
	ENSMUSG00000032013				ENSMUSG00000110589
	ENSMUSG00000032254				ENSMUSG00000049871
	ENSMUSG00000027068				ENSMUSG00000095200
	NewGene.22910				ENSMUSG00000032311
	NewGene.1964				ENSMUSG00000050957
	ENSMUSG00000094017				ENSMUSG00000032661
	ENSMUSG00000028327				ENSMUSG00000030283
	ENSMUSG00000105906				ENSMUSG00000097423
	ENSMUSG00000051748				ENSMUSG00000006731
	ENSMUSG00000026712				ENSMUSG00000019992
	NewGene.22158				ENSMUSG00000005640
	ENSMUSG00000046982				ENSMUSG00000107028
	ENSMUSG00000014158				ENSMUSG00000035673
	ENSMUSG00000024770				ENSMUSG00000038259
	ENSMUSG00000048216				ENSMUSG00000021298
	ENSMUSG00000026770				ENSMUSG00000040152
	ENSMUSG00000112331				ENSMUSG00000060188
	ENSMUSG00000061517				ENSMUSG00000097755
	ENSMUSG00000085786				ENSMUSG00000046207
	ENSMUSG00000050335				ENSMUSG00000036362
	ENSMUSG00000017400				ENSMUSG00000097194
	ENSMUSG00000053030				ENSMUSG00000109054
	ENSMUSG00000039977				ENSMUSG00000059040
	ENSMUSG00000068744				ENSMUSG00000086652
	ENSMUSG00000001525				ENSMUSG00000047443
	ENSMUSG00000031762				ENSMUSG00000033192
	ENSMUSG00000029829				ENSMUSG00000039431
	ENSMUSG00000062593				ENSMUSG00000054150
[truncated: 1,703 more rows]

## Sheet: down
	asthma-down		copd-down		ACO-down
[truncated: 2,717 more rows]
